# Supplementary material for: A Multi-Tissue Gene Expression Atlas of Water Buffalo (Bubalus bubalis) Reveals Transcriptome Conservation between Buffalo and Cattle
Source: Genes (Basel). 2023 Apr 10;14(4):890. doi: 10.3390/genes14040890 (PMC10137413; doi:10.3390/genes14040890)
Supplement: Supplementary file 1 [file genes-14-00890-s001.zip › Supplementary_Tables_1-5.xlsx]

## Sheet: Table S1
Table S1. Detailed information of the RNA-seq data.
Source	BioProject	BioSample	SampleIDa	Species	Breed	Tissue detailsb	Tissue classc	Clean reads	Mapping rate	Publicationd
Download	PRJNA448902	SAMN08871710	SAMN08871710	Swamp Buffalo	Xinyang	Adipose	Adipose	54487809	0.9241	9
Download	PRJNA448902	SAMN08871711	SAMN08871711	Swamp Buffalo	Xinyang	Adipose	Adipose	69738285	0.9272	9
Download	PRJNA448902	SAMN08871712	SAMN08871712	Swamp Buffalo	Xinyang	Adipose	Adipose	59991893	0.9361	9
Download	PRJNA448902	SAMN08871713	SAMN08871713	Swamp Buffalo	Xinyang	Adipose	Adipose	58585393	0.7792	9
Download	PRJNA448902	SAMN08871714	SAMN08871714	Swamp Buffalo	Xinyang	Adipose	Adipose	61269254	0.8027	9
Download	PRJNA448902	SAMN08871715	SAMN08871715	Swamp Buffalo	Xinyang	Adipose	Adipose	61662929	0.8146	9
Download	PRJEB25226	SAMEA103886462	SAMEA103886462	River Buffalo	Mediterranean	Adrenal	Adrenal	8082376	0.885	1
Download	PRJEB25226	SAMEA103886575	SAMEA103886575	River Buffalo	Mediterranean	Adrenal	Adrenal	15549979	0.8471	1
Download	PRJEB25226	SAMEA103886752	SAMEA103886752	River Buffalo	Pandharpuri	Adrenal	Adrenal	14254593	0.8539	1
Download	PRJEB25226	SAMEA103886909	SAMEA103886909	River Buffalo	Mediterranean	Adrenal	Adrenal	13958462	0.838	1
Download	PRJEB25226	SAMEA103886998	SAMEA103886998	River Buffalo	Mediterranean	Adrenal	Adrenal	17276087	0.8924	1
Download	PRJEB25226	SAMEA103887227	SAMEA103887227	River Buffalo	Pandharpuri	Adrenal	Adrenal	14970676	0.8539	1
Download	PRJNA514883	SAMN10736066	SAMN10736066.1	River Buffalo	Nili Ravi	Blood	Blood_Immune	23182027	0.8945	4
Download	PRJNA514883	SAMN10736066	SAMN10736066.2	River Buffalo	Nili Ravi	Blood	Blood_Immune	25307973	0.9204	4
Download	PRJNA514883	SAMN10736066	SAMN10736066.3	River Buffalo	Nili Ravi	Blood	Blood_Immune	25860320	0.9221	4
Download	PRJNA514883	SAMN10736066	SAMN10736066.4	River Buffalo	Nili Ravi	Blood	Blood_Immune	15988176	0.9234	4
Download	PRJNA514883	SAMN10736066	SAMN10736066.5	River Buffalo	Nili Ravi	Blood	Blood_Immune	25577430	0.9266	4
Download	PRJNA514883	SAMN10736066	SAMN10736066.6	River Buffalo	Nili Ravi	Blood	Blood_Immune	26399781	0.9285	4
Download	PRJNA517372	SAMN10829592	SAMN10829592	River Buffalo	Nili-Ravi × Murrah	Blood	Blood_Immune	26058950	0.9191	3
Download	PRJNA517372	SAMN10829593	SAMN10829593	River Buffalo	Nili-Ravi × Murrah	Blood	Blood_Immune	21845230	0.9131	3
Download	PRJNA517372	SAMN10829594	SAMN10829594	River Buffalo	Nili-Ravi × Murrah	Blood	Blood_Immune	24026157	0.8827	3
Download	PRJNA517372	SAMN10829595	SAMN10829595	River Buffalo	Nili-Ravi × Murrah	Blood	Blood_Immune	27550013	0.8993	3
Download	PRJNA517372	SAMN10829596	SAMN10829596	River Buffalo	Nili-Ravi × Murrah	Blood	Blood_Immune	24247869	0.9109	3
Download	PRJNA517372	SAMN10829597	SAMN10829597	River Buffalo	Nili-Ravi × Murrah	Blood	Blood_Immune	21064488	0.8826	3
Download	PRJNA517372	SAMN10829598	SAMN10829598	River Buffalo	Nili-Ravi × Murrah	Blood	Blood_Immune	24189056	0.9293	3
Download	PRJNA517372	SAMN10829599	SAMN10829599	River Buffalo	Nili-Ravi × Murrah	Blood	Blood_Immune	25502204	0.9178	3
Download	PRJEB25226	SAMEA103886460	SAMEA103886460	River Buffalo	Pandharpuri	Peripheral_blood_mononuclear_cell	Blood_Immune	9465360	0.8724	1
Download	PRJEB25226	SAMEA103886584	SAMEA103886584	River Buffalo	Pandharpuri	Peripheral_blood_mononuclear_cell	Blood_Immune	16112001	0.8842	1
Download	PRJEB25226	SAMEA103886618	SAMEA103886618	River Buffalo	Mediterranean	Peripheral_blood_mononuclear_cell	Blood_Immune	21858998	0.9022	1
Download	PRJEB25226	SAMEA103886753	SAMEA103886753	River Buffalo	Mediterranean	Peripheral_blood_mononuclear_cell	Blood_Immune	17759130	0.8806	1
Download	PRJEB25226	SAMEA103886843	SAMEA103886843	River Buffalo	Bhadawari	Peripheral_blood_mononuclear_cell	Blood_Immune	17729670	0.8775	1
Download	PRJEB25226	SAMEA103886997	SAMEA103886997	River Buffalo	Pandharpuri	Peripheral_blood_mononuclear_cell	Blood_Immune	14421051	0.8812	1
Download	PRJEB25226	SAMEA103887168	SAMEA103887168	River Buffalo	Mediterranean	Peripheral_blood_mononuclear_cell	Blood_Immune	14980064	0.89	1
Download	PRJEB25226	SAMEA103887173	SAMEA103887173	River Buffalo	Mediterranean	Peripheral_blood_mononuclear_cell	Blood_Immune	8561256	0.8843	1
Download	PRJEB4351	SAMEA2151679	SAMEA2151679	River Buffalo	unknown	White_blood_cells	Blood_Immune	28427442	0.9519	2
Download	PRJEB25226	SAMEA103886779	SAMEA103886779	River Buffalo	Mediterranean	Alveolar_macrophage	Blood_Immune	15869469	0.8941	1
Download	PRJEB25226	SAMEA103887137	SAMEA103887137	River Buffalo	Mediterranean	Alveolar_macrophage	Blood_Immune	15762493	0.8917	1
Download	PRJEB25226	SAMEA103886591	SAMEA103886591	River Buffalo	Bhadawari	Bone_marrow	Blood_Immune	13421084	0.8542	1
Download	PRJEB25226	SAMEA103886774	SAMEA103886774	River Buffalo	Mediterranean	Bone_marrow	Blood_Immune	14125038	0.881	1
Download	PRJEB25226	SAMEA103886784	SAMEA103886784	River Buffalo	Mediterranean	Bone_marrow	Blood_Immune	15732327	0.8931	1
Download	PRJEB25226	SAMEA103886832	SAMEA103886832	River Buffalo	Pandharpuri	Bone_marrow	Blood_Immune	13205192	0.8192	1
Download	PRJEB25226	SAMEA103886878	SAMEA103886878	River Buffalo	Pandharpuri	Bone_marrow	Blood_Immune	18525326	0.8549	1
Download	PRJEB25226	SAMEA103886906	SAMEA103886906	River Buffalo	Pandharpuri	Bone_marrow	Blood_Immune	16294863	0.8461	1
Download	PRJEB4351	SAMEA2159533	SAMEA2159533	River Buffalo	unknown	Bone_marrow	Blood_Immune	14571984	0.8888	2
Download	PRJEB25226	SAMEA103886526	SAMEA103886526	River Buffalo	Mediterranean	Bone_marrow_derived_macrophage	Blood_Immune	64632707	0.8441	1
Download	PRJEB25226	SAMEA103886845	SAMEA103886845	River Buffalo	Mediterranean	Bone_marrow_derived_macrophage	Blood_Immune	119880522	0.8694	1
Download	PRJEB25226	SAMEA103886970	SAMEA103886970	River Buffalo	Mediterranean	Bone_marrow_derived_macrophage	Blood_Immune	86980668	0.892	1
Download	PRJEB25226	SAMEA103887098	SAMEA103887098	River Buffalo	Mediterranean	Bone_marrow_derived_macrophage	Blood_Immune	58729136	0.8269	1
Download	PRJEB25226	SAMEA104381192	SAMEA104381192	River Buffalo	Mediterranean	Bone_marrow_derived_macrophage	Blood_Immune	52544309	0.8488	1
Download	PRJEB25226	SAMEA104381194	SAMEA104381194	River Buffalo	Mediterranean	Bone_marrow_derived_macrophage	Blood_Immune	115886781	0.8674	1
Download	PRJEB25226	SAMEA104381196	SAMEA104381196	River Buffalo	Mediterranean	Bone_marrow_derived_macrophage	Blood_Immune	14805483	0.8247	1
Download	PRJEB25226	SAMEA104381197	SAMEA104381197	River Buffalo	Mediterranean	Bone_marrow_derived_macrophage	Blood_Immune	110545971	0.8921	1
Download	PRJEB25226	SAMEA103886422	SAMEA103886422	River Buffalo	Mediterranean	Haemolymph_node	Blood_Immune	16233604	0.898	1
Download	PRJEB25226	SAMEA103887075	SAMEA103887075	River Buffalo	Mediterranean	Haemolymph_node	Blood_Immune	17924869	0.8878	1
Download	PRJEB25226	SAMEA103886446	SAMEA103886446	River Buffalo	Mediterranean	Mesenteric_lymph_node	Blood_Immune	17471400	0.8958	1
Download	PRJEB25226	SAMEA103886615	SAMEA103886615	River Buffalo	Mediterranean	Mesenteric_lymph_node	Blood_Immune	15069480	0.851	1
Download	PRJEB25226	SAMEA103886740	SAMEA103886740	River Buffalo	Pandharpuri	Mesenteric_lymph_node	Blood_Immune	18338725	0.8711	1
Download	PRJEB25226	SAMEA103886803	SAMEA103886803	River Buffalo	Mediterranean	Mesenteric_lymph_node	Blood_Immune	17619015	0.9052	1
Download	PRJEB25226	SAMEA103886942	SAMEA103886942	River Buffalo	Mediterranean	Mesenteric_lymph_node	Blood_Immune	13736353	0.853	1
Download	PRJEB25226	SAMEA103887250	SAMEA103887250	River Buffalo	Pandharpuri	Mesenteric_lymph_node	Blood_Immune	17935522	0.8739	1
Download	PRJEB4351	SAMEA2152197	SAMEA2152197	River Buffalo	unknown	Mesenteric_lymph_node	Blood_Immune	13070041	0.9356	2
Download	PRJEB25226	SAMEA103886940	SAMEA103886940	River Buffalo	Mediterranean	Monocyte_derived_macrophage	Blood_Immune	16561441	0.8666	1
Download	PRJEB25226	SAMEA103886958	SAMEA103886958	River Buffalo	Mediterranean	Monocyte_derived_macrophage	Blood_Immune	27981189	0.8786	1
Download	PRJEB25226	SAMEA103887052	SAMEA103887052	River Buffalo	Mediterranean	Monocyte_derived_macrophage	Blood_Immune	20386534	0.901	1
Download	PRJEB25226	SAMEA103886884	SAMEA103886884	River Buffalo	Mediterranean	Popliteal_lymph_node	Blood_Immune	11889153	0.8434	1
Download	PRJEB25226	SAMEA103886622	SAMEA103886622	River Buffalo	Mediterranean	Prescapular_lymph_node	Blood_Immune	21812304	0.8504	1
Download	PRJEB25226	SAMEA103886695	SAMEA103886695	River Buffalo	Mediterranean	Prescapular_lymph_node	Blood_Immune	15785478	0.8797	1
Download	PRJEB25226	SAMEA103886731	SAMEA103886731	River Buffalo	Mediterranean	Prescapular_lymph_node	Blood_Immune	13136534	0.861	1
Download	PRJEB25226	SAMEA103886815	SAMEA103886815	River Buffalo	Mediterranean	Prescapular_lymph_node	Blood_Immune	13042897	0.8431	1
Download	PRJEB25226	SAMEA103886409	SAMEA103886409	River Buffalo	Mediterranean	Submandibular_lymph_node	Blood_Immune	16979247	0.8223	1
Download	PRJEB25226	SAMEA103886577	SAMEA103886577	River Buffalo	Mediterranean	Submandibular_lymph_node	Blood_Immune	14183942	0.8659	1
Download	PRJEB25226	SAMEA103886943	SAMEA103886943	River Buffalo	Pandharpuri	Submandibular_lymph_node	Blood_Immune	14194737	0.8071	1
Download	PRJEB25226	SAMEA103886454	SAMEA103886454	River Buffalo	Mediterranean	Thymus	Blood_Immune	71824268	0.8859	1
Download	PRJEB25226	SAMEA103886553	SAMEA103886553	River Buffalo	Mediterranean	Thymus	Blood_Immune	83822229	0.7731	1
Download	PRJEB25226	SAMEA103886949	SAMEA103886949	River Buffalo	Mediterranean	Thymus	Blood_Immune	60075474	0.8312	1
Download	PRJEB25226	SAMEA103886990	SAMEA103886990	River Buffalo	Mediterranean	Thymus	Blood_Immune	64482957	0.8772	1
Download	PRJEB4351	SAMEA2149564	SAMEA2149564	River Buffalo	unknown	Thymus	Blood_Immune	15200318	0.9427	2
Download	PRJEB25226	SAMEA103886404	SAMEA103886404	River Buffalo	Mediterranean	Tonsil	Blood_Immune	33568546	0.8837	1
Download	PRJEB25226	SAMEA103886783	SAMEA103886783	River Buffalo	Mediterranean	Tonsil	Blood_Immune	22409906	0.8855	1
Download	PRJEB25226	SAMEA103886914	SAMEA103886914	River Buffalo	Mediterranean	Tonsil	Blood_Immune	18126178	0.8637	1
Download	PRJEB25226	SAMEA103886391	SAMEA103886391	River Buffalo	Mediterranean	Cerebellum	Brain	14464024	0.8213	1
Download	PRJEB25226	SAMEA103886600	SAMEA103886600	River Buffalo	Mediterranean	Cerebellum	Brain	16595021	0.885	1
Download	PRJEB25226	SAMEA103886638	SAMEA103886638	River Buffalo	Mediterranean	Cerebellum	Brain	19334784	0.8457	1
Download	PRJEB25226	SAMEA103886859	SAMEA103886859	River Buffalo	Mediterranean	Cerebellum	Brain	17194560	0.8438	1
Download	PRJEB4351	SAMEA2159406	SAMEA2159406	River Buffalo	unknown	Cerebellum	Brain	38607894	0.9475	2
Download	PRJNA62505	SAMN01093896	SAMN01093896.2	River Buffalo	unknown	Brain	Brain	10835595	0.7766	14
Download	PRJEB25226	SAMEA103886574	SAMEA103886574	River Buffalo	Mediterranean	Hippocampus	Brain	55660537	0.8452	1
Download	PRJEB25226	SAMEA103886699	SAMEA103886699	River Buffalo	Mediterranean	Hippocampus	Brain	81978890	0.8795	1
Download	PRJEB4351	SAMEA2150597	SAMEA2150597	River Buffalo	unknown	Obex	Brain	26948256	0.9369	2
Download	PRJEB25226	SAMEA103886969	SAMEA103886969	River Buffalo	Mediterranean	Occipital_lobe	Brain	67962339	0.8412	1
Download	PRJEB25226	SAMEA103886978	SAMEA103886978	River Buffalo	Mediterranean	Occipital_lobe	Brain	59387752	0.8308	1
Download	PRJEB4351	SAMEA2149947	SAMEA2149947	River Buffalo	unknown	Spinal_cord	Brain	21512544	0.9451	2
Download	PRJEB4351	SAMEA2156867	SAMEA2156867	River Buffalo	unknown	Hypophysis	Brain	22243840	0.9326	2
Download	PRJEB25226	SAMEA103886315	SAMEA103886315	River Buffalo	Mediterranean	Heart	Heart	102507252	0.8372	1
Download	PRJEB25226	SAMEA103886335	SAMEA103886335	River Buffalo	Mediterranean	Heart	Heart	64094946	0.8752	1
Download	PRJEB25226	SAMEA103886728	SAMEA103886728	River Buffalo	Mediterranean	Heart	Heart	10750706	0.82	1
Download	PRJEB25226	SAMEA103886736	SAMEA103886736	River Buffalo	Pandharpuri	Heart	Heart	20412385	0.8747	1
Download	PRJEB25226	SAMEA103886756	SAMEA103886756	River Buffalo	Mediterranean	Heart	Heart	13907010	0.8547	1
Download	PRJEB25226	SAMEA103886806	SAMEA103886806	River Buffalo	Mediterranean	Heart	Heart	58561487	0.8509	1
Download	PRJEB25226	SAMEA103886868	SAMEA103886868	River Buffalo	Mediterranean	Heart	Heart	112251629	0.8275	1
Download	PRJEB25226	SAMEA103887047	SAMEA103887047	River Buffalo	Mediterranean	Heart	Heart	18321885	0.8711	1
Download	PRJEB25226	SAMEA103887115	SAMEA103887115	River Buffalo	Pandharpuri	Heart	Heart	15308633	0.8644	1
Download	PRJEB25226	SAMEA103887145	SAMEA103887145	River Buffalo	Pandharpuri	Heart	Heart	71419963	0.8088	1
Download	PRJEB25226	SAMEA103887175	SAMEA103887175	River Buffalo	Mediterranean	Heart	Heart	22838997	0.8686	1
Download	PRJEB25226	SAMEA103887193	SAMEA103887193	River Buffalo	Mediterranean	Heart	Heart	17446964	0.8548	1
Download	PRJEB25226	SAMEA103887196	SAMEA103887196	River Buffalo	Mediterranean	Heart	Heart	19700708	0.8563	1
Download	PRJEB25226	SAMEA103887203	SAMEA103887203	River Buffalo	Mediterranean	Heart	Heart	18112297	0.8404	1
Download	PRJEB25226	SAMEA103887225	SAMEA103887225	River Buffalo	Mediterranean	Heart	Heart	3318134	0.8046	1
Download	PRJEB4351	SAMEA2148806	SAMEA2148806	River Buffalo	unknown	Heart	Heart	18535074	0.9383	2
Download	PRJNA62505	SAMN01093896	SAMN01093896.1	River Buffalo	unknown	Heart	Heart	13354048	0.8315	14
Download	PRJEB25226	SAMEA103886311	SAMEA103886311	River Buffalo	Pandharpuri	Kidney	Kidney	84716280	0.8238	1
Download	PRJEB25226	SAMEA103886349	SAMEA103886349	River Buffalo	Pandharpuri	Kidney	Kidney	15717400	0.8521	1
Download	PRJEB25226	SAMEA103886370	SAMEA103886370	River Buffalo	Pandharpuri	Kidney	Kidney	115270791	0.8664	1
Download	PRJEB25226	SAMEA103886459	SAMEA103886459	River Buffalo	Pandharpuri	Kidney	Kidney	61215027	0.78	1
Download	PRJEB25226	SAMEA103887020	SAMEA103887020	River Buffalo	Bhadawari	Kidney	Kidney	68433670	0.8146	1
Download	PRJEB25226	SAMEA103887153	SAMEA103887153	River Buffalo	Mediterranean	Kidney	Kidney	16341435	0.8489	1
Download	PRJEB25226	SAMEA103887167	SAMEA103887167	River Buffalo	Mediterranean	Kidney	Kidney	71907939	0.8734	1
Download	PRJEB25226	SAMEA103887199	SAMEA103887199	River Buffalo	Mediterranean	Kidney	Kidney	64947673	0.7985	1
Download	PRJEB25226	SAMEA103887214	SAMEA103887214	River Buffalo	Mediterranean	Kidney	Kidney	74313160	0.7917	1
Download	PRJEB25226	SAMEA103887217	SAMEA103887217	River Buffalo	Mediterranean	Kidney	Kidney	75988810	0.8734	1
Download	PRJEB25226	SAMEA103887231	SAMEA103887231	River Buffalo	Mediterranean	Kidney	Kidney	17622403	0.8305	1
Download	PRJEB25226	SAMEA103887238	SAMEA103887238	River Buffalo	Mediterranean	Kidney	Kidney	15975860	0.8871	1
Download	PRJEB25226	SAMEA103887263	SAMEA103887263	River Buffalo	Mediterranean	Kidney	Kidney	19614850	0.8908	1
Download	PRJEB4351	SAMEA2143802	SAMEA2143802	River Buffalo	unknown	Kidney	Kidney	16848347	0.9393	2
Download	PRJNA62505	SAMN01093896	SAMN01093896.3	River Buffalo	unknown	Kidney	Kidney	18303516	0.9348	14
Download	PRJEB25226	SAMEA103886483	SAMEA103886483	River Buffalo	Mediterranean	Caecum	Large intestine	14386191	0.8326	1
Download	PRJEB25226	SAMEA103886520	SAMEA103886520	River Buffalo	Mediterranean	Caecum	Large intestine	17945533	0.8677	1
Download	PRJEB25226	SAMEA103886912	SAMEA103886912	River Buffalo	Mediterranean	Caecum	Large intestine	8252708	0.8442	1
Download	PRJEB25226	SAMEA103887031	SAMEA103887031	River Buffalo	Mediterranean	Caecum	Large intestine	14702752	0.8393	1
Download	PRJEB25226	SAMEA103886434	SAMEA103886434	River Buffalo	Pandharpuri	Colon	Large intestine	15040392	0.8233	1
Download	PRJEB25226	SAMEA103887157	SAMEA103887157	River Buffalo	Mediterranean	Colon	Large intestine	13449990	0.8244	1
Download	PRJEB25226	SAMEA103887189	SAMEA103887189	River Buffalo	Mediterranean	Colon	Large intestine	15746825	0.8843	1
Download	PRJEB25226	SAMEA103887207	SAMEA103887207	River Buffalo	Mediterranean	Colon	Large intestine	15299255	0.8787	1
Download	PRJEB25226	SAMEA103887210	SAMEA103887210	River Buffalo	Mediterranean	Colon	Large intestine	19020304	0.8859	1
Download	PRJEB25226	SAMEA103887230	SAMEA103887230	River Buffalo	Mediterranean	Colon	Large intestine	15104600	0.8535	1
Download	PRJEB25226	SAMEA103887241	SAMEA103887241	River Buffalo	Mediterranean	Colon	Large intestine	16356658	0.8313	1
Download	PRJEB25226	SAMEA103887251	SAMEA103887251	River Buffalo	Mediterranean	Colon	Large intestine	17657997	0.8757	1
Download	PRJEB25226	SAMEA103886588	SAMEA103886588	River Buffalo	Pandharpuri	Pylorus	Large intestine	14382564	0.804	1
Download	PRJEB25226	SAMEA103886659	SAMEA103886659	River Buffalo	Mediterranean	Pylorus	Large intestine	14376447	0.8563	1
Download	PRJEB25226	SAMEA103886665	SAMEA103886665	River Buffalo	Mediterranean	Pylorus	Large intestine	16120116	0.8953	1
Download	PRJEB25226	SAMEA103886805	SAMEA103886805	River Buffalo	Mediterranean	Pylorus	Large intestine	13802159	0.8114	1
Download	PRJEB25226	SAMEA103886890	SAMEA103886890	River Buffalo	Mediterranean	Pylorus	Large intestine	13039645	0.887	1
Download	PRJEB25226	SAMEA103886621	SAMEA103886621	River Buffalo	Mediterranean	Rectum	Large intestine	18888436	0.906	1
Download	PRJEB25226	SAMEA103886667	SAMEA103886667	River Buffalo	Pandharpuri	Rectum	Large intestine	16343308	0.8494	1
Download	PRJEB25226	SAMEA103886696	SAMEA103886696	River Buffalo	Mediterranean	Rectum	Large intestine	20858190	0.8957	1
Download	PRJEB25226	SAMEA103886709	SAMEA103886709	River Buffalo	Pandharpuri	Rectum	Large intestine	15336241	0.7975	1
Download	PRJEB25226	SAMEA103886730	SAMEA103886730	River Buffalo	Mediterranean	Rectum	Large intestine	15869527	0.8353	1
Download	PRJEB25226	SAMEA103886813	SAMEA103886813	River Buffalo	Mediterranean	Rectum	Large intestine	15188438	0.8512	1
Download	PRJEB25226	SAMEA103886869	SAMEA103886869	River Buffalo	Pandharpuri	Rectum	Large intestine	16285687	0.8784	1
Download	PRJEB25226	SAMEA103886402	SAMEA103886402	River Buffalo	Bhadawari	Liver	Liver	93487370	0.8144	1
Download	PRJEB25226	SAMEA103886440	SAMEA103886440	River Buffalo	Mediterranean	Liver	Liver	74219188	0.8618	1
Download	PRJEB25226	SAMEA103886593	SAMEA103886593	River Buffalo	Pandharpuri	Liver	Liver	86029820	0.846	1
Download	PRJEB25226	SAMEA103886602	SAMEA103886602	River Buffalo	Mediterranean	Liver	Liver	78133622	0.8172	1
Download	PRJEB25226	SAMEA103886748	SAMEA103886748	River Buffalo	Pandharpuri	Liver	Liver	73059203	0.8246	1
Download	PRJEB25226	SAMEA103886799	SAMEA103886799	River Buffalo	Mediterranean	Liver	Liver	60062415	0.8668	1
Download	PRJEB25226	SAMEA103886932	SAMEA103886932	River Buffalo	Mediterranean	Liver	Liver	73387454	0.8271	1
Download	PRJEB25226	SAMEA103887254	SAMEA103887254	River Buffalo	Pandharpuri	Liver	Liver	79235003	0.814	1
Download	PRJEB4351	SAMEA2159711	SAMEA2159711	River Buffalo	unknown	Liver	Liver	15632562	0.9469	2
Download	PRJNA453843	SAMN01093896	SAMN01093896	River Buffalo	Murrah	Liver	Liver	132765014	0.9007	13
Download	PRJNA62505	SAMN01093896	SAMN01093896.4	River Buffalo	unknown	Liver	Liver	19269715	0.9238	14
Download	PRJNA341921	SAMN05730165	SAMN05730165	Swamp Buffalo	unknown	Liver	Liver	28498208	0.9394	12
Download	PRJNA341921	SAMN05730168	SAMN05730168	Swamp Buffalo	unknown	Liver	Liver	29917323	0.9473	12
Download	PRJNA341921	SAMN05730169	SAMN05730169	Swamp Buffalo	unknown	Liver	Liver	29813166	0.9398	12
Download	PRJNA341921	SAMN05730172	SAMN05730172	Swamp Buffalo	unknown	Liver	Liver	26489873	0.9443	12
Download	PRJNA341921	SAMN05730173	SAMN05730173	Swamp Buffalo	unknown	Liver	Liver	24834392	0.9409	12
Download	PRJNA341921	SAMN05730174	SAMN05730174_1	Swamp Buffalo	unknown	Liver	Liver	21192110	0.9459	12
Download	PRJNA341921	SAMN05730174	SAMN05730174_2	Swamp Buffalo	unknown	Liver	Liver	25189495	0.9439	12
Download	PRJNA341921	SAMN05730174	SAMN05730174_3	Swamp Buffalo	unknown	Liver	Liver	28428253	0.9385	12
Download	PRJNA341921	SAMN05730174	SAMN05730174_4	Swamp Buffalo	unknown	Liver	Liver	30458806	0.959	12
Download	PRJNA341921	SAMN05730174	SAMN05730174_5	Swamp Buffalo	unknown	Liver	Liver	22802498	0.9345	12
Download	PRJNA341921	SAMN05730174	SAMN05730174_6	Swamp Buffalo	unknown	Liver	Liver	24453921	0.9417	12
Download	PRJNA341921	SAMN05730174	SAMN05730174_7	Swamp Buffalo	unknown	Liver	Liver	33927265	0.9506	12
Download	PRJNA341921	SAMN05730174	SAMN05730174_8	Swamp Buffalo	unknown	Liver	Liver	21068997	0.9418	12
Download	PRJNA341921	SAMN05730174	SAMN05730174_9	Swamp Buffalo	unknown	Liver	Liver	23843316	0.9437	12
Download	PRJNA341921	SAMN05730191	SAMN05730191	Swamp Buffalo	unknown	Liver	Liver	26709568	0.9423	12
Download	PRJNA341921	SAMN05730196	SAMN05730196	Swamp Buffalo	unknown	Liver	Liver	32699314	0.9376	12
Download	PRJNA341921	SAMN05730198	SAMN05730198	Swamp Buffalo	unknown	Liver	Liver	28944855	0.9422	12
Download	PRJNA341921	SAMN05730199	SAMN05730199	Swamp Buffalo	unknown	Liver	Liver	28777520	0.9417	12
Download	PRJEB25226	SAMEA103886336	SAMEA103886336	River Buffalo	Pandharpuri	Lung	Lung	65946886	0.8075	1
Download	PRJEB25226	SAMEA103886389	SAMEA103886389	River Buffalo	Mediterranean	Lung	Lung	68089133	0.8746	1
Download	PRJEB25226	SAMEA103886450	SAMEA103886450	River Buffalo	Pandharpuri	Lung	Lung	99226841	0.8343	1
Download	PRJEB25226	SAMEA103886488	SAMEA103886488	River Buffalo	Bhadawari	Lung	Lung	80366751	0.8297	1
Download	PRJEB25226	SAMEA103886552	SAMEA103886552	River Buffalo	Pandharpuri	Lung	Lung	80466914	0.829	1
Download	PRJEB25226	SAMEA103886836	SAMEA103886836	River Buffalo	Mediterranean	Lung	Lung	91736797	0.8174	1
Download	PRJEB25226	SAMEA103887045	SAMEA103887045	River Buffalo	Mediterranean	Lung	Lung	70248963	0.8678	1
Download	PRJEB25226	SAMEA103887122	SAMEA103887122	River Buffalo	Mediterranean	Lung	Lung	54991930	0.7885	1
Download	PRJEB4351	SAMEA2142479	SAMEA2142479	River Buffalo	unknown	Lung	Lung	17139296	0.9432	2
Download	PRJNA62505	SAMN01093896	SAMN01093896.5	River Buffalo	unknown	Lung	Lung	23383304	0.8903	14
Download	PRJEB4351	SAMEA2154127	SAMEA2154127	River Buffalo	unknown	Mammary	Mammary	14597831	0.9217	2
Download	PRJNA383059	SAMN06758773	SAMN06758773.1	River Buffalo	Murrah cross	Mammary	Mammary	38107879	0.919	11
Download	PRJNA383059	SAMN06758773	SAMN06758773.2	River Buffalo	Murrah cross	Mammary	Mammary	48184402	0.923	11
Download	PRJNA383059	SAMN06758773	SAMN06758773.3	River Buffalo	Murrah cross	Mammary	Mammary	37579026	0.9171	11
Download	PRJNA480718	SAMN09643944	SAMN09643944.1	River Buffalo	Murrah	Mammary	Mammary	23177843	0.96	5
Download	PRJNA480718	SAMN09643944	SAMN09643944.2	River Buffalo	Murrah	Mammary	Mammary	22676672	0.9479	5
Download	PRJNA480718	SAMN09643944	SAMN09643944.3	River Buffalo	Murrah	Mammary	Mammary	22973387	0.9477	5
Download	PRJNA480718	SAMN09643944	SAMN09643944.4	River Buffalo	Murrah	Mammary	Mammary	23105089	0.9562	5
Download	PRJNA480718	SAMN09643944	SAMN09643944.5	River Buffalo	Murrah	Mammary	Mammary	22612412	0.9233	5
Download	PRJNA480718	SAMN09643944	SAMN09643944.6	River Buffalo	Murrah	Mammary	Mammary	23109908	0.9155	5
Download	PRJNA480718	SAMN09643944	SAMN09643944.7	River Buffalo	Murrah	Mammary	Mammary	22510370	0.9657	5
Download	PRJNA480718	SAMN09643944	SAMN09643944.8	River Buffalo	Murrah	Mammary	Mammary	22439123	0.9626	5
Download	PRJEB4351	SAMEA2149403	SAMEA2149403	River Buffalo	unknown	Longissimus_dorsali	Muscle	10565825	0.934	2
Download	PRJEB25226	SAMEA104381190	SAMEA104381190	River Buffalo	Mediterranean	Longitudinal_dorsal_muscle	Muscle	71806273	0.8448	1
Download	PRJEB25226	SAMEA104381191	SAMEA104381191	River Buffalo	Mediterranean	Longitudinal_dorsal_muscle	Muscle	73300401	0.8344	1
Download	PRJEB25226	SAMEA104381193	SAMEA104381193	River Buffalo	Mediterranean	Longitudinal_dorsal_muscle	Muscle	74055372	0.8196	1
Download	PRJEB25226	SAMEA104381195	SAMEA104381195	River Buffalo	Mediterranean	Longitudinal_dorsal_muscle	Muscle	61642796	0.8657	1
Download	PRJEB4351	SAMEA2142778	SAMEA2142778	River Buffalo	unknown	Semitendinosus	Muscle	11097917	0.9302	2
Download	PRJEB25226	SAMEA103886316	SAMEA103886316	River Buffalo	Pandharpuri	Ovary	Ovary	60571782	0.786	1
Download	PRJEB25226	SAMEA103886480	SAMEA103886480	River Buffalo	Mediterranean	Ovary	Ovary	69097337	0.8088	1
Download	PRJEB25226	SAMEA103886931	SAMEA103886931	River Buffalo	Mediterranean	Ovary	Ovary	64414576	0.8749	1
Download	PRJEB25226	SAMEA103887010	SAMEA103887010	River Buffalo	Pandharpuri	Ovary	Ovary	80231893	0.7958	1
Download	PRJEB4351	SAMEA2148123	SAMEA2148123	River Buffalo	unknown	Ovary	Ovary	26450155	0.9485	2
Download	PRJEB4351	SAMEA2149013	SAMEA2149013	River Buffalo	unknown	Ovary	Ovary	13922470	0.9297	2
Download	PRJEB25226	SAMEA103886637	SAMEA103886637	River Buffalo	Mediterranean	Pituitary	Pituitary	17377613	0.8898	1
Download	PRJEB25226	SAMEA103886858	SAMEA103886858	River Buffalo	Mediterranean	Pituitary	Pituitary	19751798	0.9047	1
Download	PRJEB25226	SAMEA103886390	SAMEA103886390	River Buffalo	Mediterranean	Salivary	Salivary Gland	16561820	0.8882	1
Download	PRJEB25226	SAMEA103886597	SAMEA103886597	River Buffalo	Mediterranean	Salivary	Salivary Gland	14963215	0.8797	1
Download	PRJEB25226	SAMEA103886628	SAMEA103886628	River Buffalo	Mediterranean	Salivary	Salivary Gland	13746779	0.8389	1
Download	PRJEB25226	SAMEA103886711	SAMEA103886711	River Buffalo	Mediterranean	Salivary	Salivary Gland	18548713	0.8627	1
Download	PRJEB25226	SAMEA103886898	SAMEA103886898	River Buffalo	Bhadawari	Salivary	Salivary Gland	15685590	0.8599	1
Download	PRJEB25226	SAMEA103886971	SAMEA103886971	River Buffalo	Pandharpuri	Salivary	Salivary Gland	20688500	0.8552	1
Download	PRJNA633919	SAMN15010194	Bubalus_O720_01_T01	Swamp Buffalo	Guizhoubai	Skin	Skin	19293178	0.9408	15
Download	PRJNA633919	SAMN15010195	Bubalus_O720_01_T02	Swamp Buffalo	Guizhoubai	Skin	Skin	21564988	0.9406	15
Download	PRJNA633919	SAMN15010196	Bubalus_O720_01_T03	Swamp Buffalo	Guizhoubai	Skin	Skin	24837217	0.9442	15
Download	PRJNA633919	SAMN15010197	Bubalus_O720_01_T04	Swamp Buffalo	Guizhou	Skin	Skin	21857872	0.9355	15
Download	PRJNA633919	SAMN15010198	Bubalus_O720_01_T05	Swamp Buffalo	Guizhou	Skin	Skin	21795594	0.9343	15
Download	PRJNA633919	SAMN15010199	Bubalus_O720_01_T06	Swamp Buffalo	Guizhou	Skin	Skin	22907228	0.9345	15
Download	PRJEB25226	SAMEA103886465	SAMEA103886465	River Buffalo	Mediterranean	Duodenum	Small intestine	12453021	0.8669	1
Download	PRJEB25226	SAMEA103886547	SAMEA103886547	River Buffalo	Mediterranean	Duodenum	Small intestine	16518343	0.8435	1
Download	PRJEB25226	SAMEA103887012	SAMEA103887012	River Buffalo	Mediterranean	Duodenum	Small intestine	20444122	0.8685	1
Download	PRJEB25226	SAMEA103886448	SAMEA103886448	River Buffalo	Mediterranean	Ileum	Small intestine	96399337	0.8081	1
Download	PRJEB25226	SAMEA103886617	SAMEA103886617	River Buffalo	Mediterranean	Ileum	Small intestine	55519834	0.8634	1
Download	PRJEB25226	SAMEA103886741	SAMEA103886741	River Buffalo	Pandharpuri	Ileum	Small intestine	88283481	0.8165	1
Download	PRJEB25226	SAMEA103886809	SAMEA103886809	River Buffalo	Mediterranean	Ileum	Small intestine	56916715	0.8593	1
Download	PRJEB25226	SAMEA103886939	SAMEA103886939	River Buffalo	Mediterranean	Ileum	Small intestine	63105876	0.8341	1
Download	PRJEB25226	SAMEA103886318	SAMEA103886318	River Buffalo	Mediterranean	Jejunum	Small intestine	14796122	0.8557	1
Download	PRJEB25226	SAMEA103886533	SAMEA103886533	River Buffalo	Bhadawari	Jejunum	Small intestine	15002982	0.8231	1
Download	PRJEB25226	SAMEA103886925	SAMEA103886925	River Buffalo	Mediterranean	Jejunum	Small intestine	14538991	0.8496	1
Download	PRJEB25226	SAMEA103886956	SAMEA103886956	River Buffalo	Mediterranean	Jejunum	Small intestine	14327186	0.795	1
Download	PRJEB25226	SAMEA103887050	SAMEA103887050	River Buffalo	Mediterranean	Jejunum	Small intestine	13284073	0.8468	1
Download	PRJEB25226	SAMEA103887119	SAMEA103887119	River Buffalo	Pandharpuri	Jejunum	Small intestine	17636702	0.8656	1
Download	PRJEB4351	SAMEA2146608	SAMEA2146608	River Buffalo	unknown	Small_intestine	Small intestine	10852267	0.9186	2
Download	PRJEB25226	SAMEA103886475	SAMEA103886475	River Buffalo	Mediterranean	Spleen	Spleen	11348834	0.8533	1
Download	PRJEB25226	SAMEA103886507	SAMEA103886507	River Buffalo	Mediterranean	Spleen	Spleen	15303319	0.8447	1
Download	PRJEB25226	SAMEA103886544	SAMEA103886544	River Buffalo	Mediterranean	Spleen	Spleen	14915157	0.8082	1
Download	PRJEB25226	SAMEA103886983	SAMEA103886983	River Buffalo	Mediterranean	Spleen	Spleen	15531847	0.8521	1
Download	PRJEB4351	SAMEA2145927	SAMEA2145927	River Buffalo	unknown	Spleen	Spleen	17859563	0.9214	2
Download	PRJNA62505	SAMN01093896	SAMN01093896.8	River Buffalo	unknown	Spleen	Spleen	43604819	0.8047	14
Download	PRJEB25226	SAMEA103886421	SAMEA103886421	River Buffalo	Pandharpuri	Abomasum	Stomach	18241631	0.8156	1
Download	PRJEB25226	SAMEA103886443	SAMEA103886443	River Buffalo	Pandharpuri	Abomasum	Stomach	15983436	0.8314	1
Download	PRJEB25226	SAMEA103887205	SAMEA103887205	River Buffalo	Mediterranean	Abomasum	Stomach	15920822	0.8459	1
Download	PRJEB25226	SAMEA103887209	SAMEA103887209	River Buffalo	Mediterranean	Abomasum	Stomach	24246793	0.8948	1
Download	PRJEB25226	SAMEA103887235	SAMEA103887235	River Buffalo	Mediterranean	Abomasum	Stomach	8922042	0.8306	1
Download	PRJEB25226	SAMEA103887246	SAMEA103887246	River Buffalo	Mediterranean	Abomasum	Stomach	17894583	0.819	1
Download	PRJEB4351	SAMEA2144234	SAMEA2144234	River Buffalo	unknown	Abomasum	Stomach	21365559	0.927	2
Download	PRJEB25226	SAMEA103886437	SAMEA103886437	River Buffalo	Mediterranean	Omasum	Stomach	15521176	0.818	1
Download	PRJEB25226	SAMEA103886464	SAMEA103886464	River Buffalo	Mediterranean	Omasum	Stomach	16673873	0.8729	1
Download	PRJEB25226	SAMEA103886612	SAMEA103886612	River Buffalo	Mediterranean	Omasum	Stomach	13947821	0.8126	1
Download	PRJEB25226	SAMEA103886668	SAMEA103886668	River Buffalo	Pandharpuri	Omasum	Stomach	14032885	0.8356	1
Download	PRJEB25226	SAMEA103886796	SAMEA103886796	River Buffalo	Mediterranean	Omasum	Stomach	12957460	0.8661	1
Download	PRJEB25226	SAMEA103886839	SAMEA103886839	River Buffalo	Pandharpuri	Omasum	Stomach	12016235	0.8705	1
Download	PRJEB25226	SAMEA103887005	SAMEA103887005	River Buffalo	Bhadawari	Omasum	Stomach	15654950	0.8839	1
Download	PRJEB25226	SAMEA103886451	SAMEA103886451	River Buffalo	Mediterranean	Reticulum	Stomach	115607402	0.7867	1
Download	PRJEB25226	SAMEA103886616	SAMEA103886616	River Buffalo	Mediterranean	Reticulum	Stomach	57737970	0.7823	1
Download	PRJEB25226	SAMEA103886625	SAMEA103886625	River Buffalo	Pandharpuri	Reticulum	Stomach	68939703	0.7768	1
Download	PRJEB25226	SAMEA103886660	SAMEA103886660	River Buffalo	Mediterranean	Reticulum	Stomach	73824377	0.7992	1
Download	PRJEB25226	SAMEA103886802	SAMEA103886802	River Buffalo	Mediterranean	Reticulum	Stomach	69329291	0.8424	1
Download	PRJEB25226	SAMEA103886313	SAMEA103886313	River Buffalo	Pandharpuri	Rumen	Stomach	17155067	0.7859	1
Download	PRJEB25226	SAMEA103886381	SAMEA103886381	River Buffalo	Mediterranean	Rumen	Stomach	15802447	0.9005	1
Download	PRJEB25226	SAMEA103886537	SAMEA103886537	River Buffalo	Pandharpuri	Rumen	Stomach	16409501	0.8567	1
Download	PRJEB25226	SAMEA103886838	SAMEA103886838	River Buffalo	Mediterranean	Rumen	Stomach	16554924	0.8679	1
Download	PRJEB25226	SAMEA103887094	SAMEA103887094	River Buffalo	Mediterranean	Rumen	Stomach	17670744	0.9101	1
Download	PRJEB25226	SAMEA103887128	SAMEA103887128	River Buffalo	Mediterranean	Rumen	Stomach	15578807	0.8452	1
Download	PRJEB4351	SAMEA2146239	SAMEA2146239	River Buffalo	unknown	Rumen	Stomach	9533099	0.9155	2
Download	PRJEB25226	SAMEA103887056	SAMEA103887056	River Buffalo	Bhadawari	Testis	Testis	96783687	0.8219	1
Download	PRJEB25226	SAMEA103887219	SAMEA103887219	River Buffalo	Mediterranean	Testis	Testis	63299174	0.864	1
Download	PRJEB25226	SAMEA103887252	SAMEA103887252	River Buffalo	Mediterranean	Testis	Testis	66881802	0.8331	1
Download	PRJEB4351	SAMEA2159387	SAMEA2159387	River Buffalo	unknown	Testis	Testis	12530945	0.9366	2
Download	PRJNA62505	SAMN01093896	SAMN01093896.9	River Buffalo	unknown	Testis	Testis	42235748	0.8919	14
Download	PRJEB4351	SAMEA2149993	SAMEA2149993	River Buffalo	unknown	Endometrium	Uterus	22989971	0.9434	2
Download	PRJEB25226	SAMEA103886337	SAMEA103886337	River Buffalo	Mediterranean	Oviduct	Uterus	14032725	0.8732	1
Download	PRJEB25226	SAMEA103887109	SAMEA103887109	River Buffalo	Mediterranean	Oviduct	Uterus	19003563	0.9109	1
Download	PRJEB4351	SAMEA2145210	SAMEA2145210	River Buffalo	unknown	Oviduct	Uterus	22718536	0.9383	2
Inhouse	PRJNA951806	SAMN34061764	B1-PXZF-1-21	Swamp Buffalo	Guizhou	Adipose	Adipose	22021417	0.9432	-
Inhouse	PRJNA951806	SAMN34061765	B2-PXZF-1-21	Swamp Buffalo	Guizhou	Adipose	Adipose	21558311	0.9539	-
Inhouse	PRJNA951806	SAMN34061766	W1-PXZF-1-21	Swamp Buffalo	Guizhoubai	Adipose	Adipose	19828840	0.9544	-
Inhouse	PRJNA951806	SAMN34061767	W2-PXZF-1-21	Swamp Buffalo	Guizhoubai	Adipose	Adipose	20493528	0.9576	-
Inhouse	PRJNA951806	SAMN34061768	B1-SSX-1-23	Swamp Buffalo	Guizhou	Adrenal	Adrenal	22615327	0.9528	-
Inhouse	PRJNA951806	SAMN34061769	B2-SSX-1-23	Swamp Buffalo	Guizhou	Adrenal	Adrenal	19546890	0.9298	-
Inhouse	PRJNA951806	SAMN34061770	W1-SSX-1-23-2	Swamp Buffalo	Guizhoubai	Adrenal	Adrenal	22134839	0.952	-
Inhouse	PRJNA951806	SAMN34061771	W2-SSX-1-23	Swamp Buffalo	Guizhoubai	Adrenal	Adrenal	20535625	0.9515	-
Inhouse	PRJNA951806	SAMN34061772	B1-LBC-1-22	Swamp Buffalo	Guizhou	Intestinal lymph nodes	Blood_Immune	20685595	0.8458	-
Inhouse	PRJNA951806	SAMN34061773	B2-LBC-1-22	Swamp Buffalo	Guizhou	Intestinal lymph nodes	Blood_Immune	23326679	0.9307	-
Inhouse	PRJNA951806	SAMN34061774	W1-LBC-5-22	Swamp Buffalo	Guizhoubai	Intestinal lymph nodes	Blood_Immune	21013169	0.9166	-
Inhouse	PRJNA951806	SAMN34061775	W2-LBC-1-22	Swamp Buffalo	Guizhoubai	Intestinal lymph nodes	Blood_Immune	19202277	0.9195	-
Inhouse	PRJNA951806	SAMN34061776	B1-NG-1-27	Swamp Buffalo	Guizhou	Brainstem	Brain	23735944	0.8848	-
Inhouse	PRJNA951806	SAMN34061777	B2-NG-5-27	Swamp Buffalo	Guizhou	Brainstem	Brain	14889178	0.9319	-
Inhouse	PRJNA951806	SAMN34061778	W1-NG-5-27	Swamp Buffalo	Guizhoubai	Brainstem	Brain	13844690	0.9298	-
Inhouse	PRJNA951806	SAMN34061779	W2-NG-5-27	Swamp Buffalo	Guizhoubai	Brainstem	Brain	14753313	0.9325	-
Inhouse	PRJNA951806	SAMN34061780	B1-XN-1-25	Swamp Buffalo	Guizhou	Cerebellum	Brain	20290690	0.9505	-
Inhouse	PRJNA951806	SAMN34061781	B2-XN-5-26	Swamp Buffalo	Guizhou	Cerebellum	Brain	22072316	0.9482	-
Inhouse	PRJNA951806	SAMN34061782	W1-XN-5-26	Swamp Buffalo	Guizhoubai	Cerebellum	Brain	23742574	0.9592	-
Inhouse	PRJNA951806	SAMN34061783	W2-XN-5-26	Swamp Buffalo	Guizhoubai	Cerebellum	Brain	20771943	0.9449	-
Inhouse	PRJNA951806	SAMN34061784	B1-DN-1-25	Swamp Buffalo	Guizhou	Cerebral cortex	Brain	21927974	0.965	-
Inhouse	PRJNA951806	SAMN34061785	B2-DN-6-25	Swamp Buffalo	Guizhou	Cerebral cortex	Brain	21802741	0.9621	-
Inhouse	PRJNA951806	SAMN34061786	W1-DN-5-25	Swamp Buffalo	Guizhoubai	Cerebral cortex	Brain	23841809	0.9582	-
Inhouse	PRJNA951806	SAMN34061787	W2-DN-5-25	Swamp Buffalo	Guizhoubai	Cerebral cortex	Brain	21036738	0.9451	-
Inhouse	PRJNA951806	SAMN34061788	B1-XQN-1-28	Swamp Buffalo	Guizhou	Hypothalamus	Brain	23854618	0.946	-
Inhouse	PRJNA951806	SAMN34061789	B2-XQN-5-28	Swamp Buffalo	Guizhou	Hypothalamus	Brain	21250241	0.9248	-
Inhouse	PRJNA951806	SAMN34061790	W1-XQN-5-28	Swamp Buffalo	Guizhoubai	Hypothalamus	Brain	51623879	0.9544	-
Inhouse	PRJNA951806	SAMN34061791	W2-XQN-1-28	Swamp Buffalo	Guizhoubai	Hypothalamus	Brain	20033628	0.9456	-
Inhouse	PRJNA951806	SAMN34061792	B1-XZ-1-11	Swamp Buffalo	Guizhou	Heart	Heart	24015488	0.8598	-
Inhouse	PRJNA951806	SAMN34061793	B2-XZ-1-11	Swamp Buffalo	Guizhou	Heart	Heart	19372774	0.9129	-
Inhouse	PRJNA951806	SAMN34061794	W1-XZ-1-11	Swamp Buffalo	Guizhoubai	Heart	Heart	25436648	0.9712	-
Inhouse	PRJNA951806	SAMN34061795	W2-XZ-1-11	Swamp Buffalo	Guizhoubai	Heart	Heart	21095933	0.9546	-
Inhouse	PRJNA951806	SAMN34061796	B1-SZP-15	Swamp Buffalo	Guizhou	Kidney cortex	Kidney	22396726	0.9558	-
Inhouse	PRJNA951806	SAMN34061797	B2-SZP-15	Swamp Buffalo	Guizhou	Kidney cortex	Kidney	19690240	0.9577	-
Inhouse	PRJNA951806	SAMN34061798	W1-SZP-15	Swamp Buffalo	Guizhoubai	Kidney cortex	Kidney	19207745	0.8807	-
Inhouse	PRJNA951806	SAMN34061799	W2-SZP-5-15	Swamp Buffalo	Guizhoubai	Kidney cortex	Kidney	20839544	0.9387	-
Inhouse	PRJNA951806	SAMN34061801	B1-GZ-1-13	Swamp Buffalo	Guizhou	Liver	Liver	20075390	0.943	-
Inhouse	PRJNA951806	SAMN34061802	B2-GZ-1-13	Swamp Buffalo	Guizhou	Liver	Liver	19798025	0.9448	-
Inhouse	PRJNA951806	SAMN34061803	W1-GZ-1-13	Swamp Buffalo	Guizhoubai	Liver	Liver	21782507	0.9434	-
Inhouse	PRJNA951806	SAMN34061804	W2-GZ-1-13	Swamp Buffalo	Guizhoubai	Liver	Liver	21653551	0.9101	-
Inhouse	PRJNA951806	SAMN34061805	B1-FZ-1-12	Swamp Buffalo	Guizhou	Lung	Lung	19143440	0.9297	-
Inhouse	PRJNA951806	SAMN34061806	B2-FZ-1-12	Swamp Buffalo	Guizhou	Lung	Lung	20542183	0.8507	-
Inhouse	PRJNA951806	SAMN34061807	W1-FZ-1-12	Swamp Buffalo	Guizhoubai	Lung	Lung	21163871	0.945	-
Inhouse	PRJNA951806	SAMN34061808	W2-FZ-1-12	Swamp Buffalo	Guizhoubai	Lung	Lung	21173230	0.9465	-
Inhouse	PRJNA951806	SAMN34061809	B1-RX-1-17	Swamp Buffalo	Guizhou	Mammary	Mammary	20384378	0.9404	-
Inhouse	PRJNA951806	SAMN34061810	B2-RX-5-17	Swamp Buffalo	Guizhou	Mammary	Mammary	20017712	0.9233	-
Inhouse	PRJNA951806	SAMN34061811	W1-RX-1-17	Swamp Buffalo	Guizhoubai	Mammary	Mammary	21758262	0.938	-
Inhouse	PRJNA951806	SAMN34061812	W2-RX-1-17	Swamp Buffalo	Guizhoubai	Mammary	Mammary	18892521	0.9361	-
Inhouse	PRJNA951806	SAMN34061813	B1-GGJ-1-30	Swamp Buffalo	Guizhou	Skeletal muscle	Muscle	21917902	0.9502	-
Inhouse	PRJNA951806	SAMN34061814	B2-GGJ-1-30	Swamp Buffalo	Guizhou	Skeletal muscle	Muscle	19758363	0.9578	-
Inhouse	PRJNA951806	SAMN34061815	W1-GGJ-1-30	Swamp Buffalo	Guizhoubai	Skeletal muscle	Muscle	20084172	0.8577	-
Inhouse	PRJNA951806	SAMN34061816	W2-GGJ-1-30	Swamp Buffalo	Guizhoubai	Skeletal muscle	Muscle	18620395	0.9577	-
Inhouse	PRJNA951806	SAMN34061817	B2-LC-1-19	Swamp Buffalo	Guizhou	Ovary	Ovary	20614390	0.9491	-
Inhouse	PRJNA951806	SAMN34061818	W1-LC-1-19	Swamp Buffalo	Guizhoubai	Ovary	Ovary	21731369	0.9524	-
Inhouse	PRJNA951806	SAMN34061819	W2-LC-1-19	Swamp Buffalo	Guizhoubai	Ovary	Ovary	19443388	0.9512	-
Inhouse	PRJNA951806	SAMN34061820	B1-CT-1-29	Swamp Buffalo	Guizhou	Pituitary	Pituitary	22571644	0.9635	-
Inhouse	PRJNA951806	SAMN34061821	B2-CT-1-29	Swamp Buffalo	Guizhou	Pituitary	Pituitary	18723335	0.9619	-
Inhouse	PRJNA951806	SAMN34061822	W1-CT-1-29	Swamp Buffalo	Guizhoubai	Pituitary	Pituitary	25511534	0.9659	-
Inhouse	PRJNA951806	SAMN34061823	W2-CT-1-29	Swamp Buffalo	Guizhoubai	Pituitary	Pituitary	22417263	0.956	-
Inhouse	PRJNA951806	SAMN34061824	B1-PF-1-33B	Swamp Buffalo	Guizhou	Skin	Skin	19987503	0.9458	-
Inhouse	PRJNA951806	SAMN34061825	B2-PF-1-33B	Swamp Buffalo	Guizhou	Skin	Skin	20775110	0.9168	-
Inhouse	PRJNA951806	SAMN34061826	W1-PF-1-33	Swamp Buffalo	Guizhoubai	Skin	Skin	22272184	0.9433	-
Inhouse	PRJNA951806	SAMN34061827	B1-KC-1-6	Swamp Buffalo	Guizhou	Jejunum	Small intestine	20361637	0.8092	-
Inhouse	PRJNA951806	SAMN34061828	W1-KC-1-6	Swamp Buffalo	Guizhoubai	Jejunum	Small intestine	22200100	0.9079	-
Inhouse	PRJNA951806	SAMN34061800	W2-KC-1-6	Swamp Buffalo	Guizhoubai	Jejunum	Small intestine	24195142	0.8976	-
Inhouse	PRJNA951806	SAMN34061829	B1-PZ-1-14	Swamp Buffalo	Guizhou	Spleen	Spleen	23089554	0.8927	-
Inhouse	PRJNA951806	SAMN34061830	B2-PZ-5-14	Swamp Buffalo	Guizhou	Spleen	Spleen	20513927	0.9128	-
Inhouse	PRJNA951806	SAMN34061831	W1-PZ-1-14	Swamp Buffalo	Guizhoubai	Spleen	Spleen	21799261	0.9047	-
Inhouse	PRJNA951806	SAMN34061832	W2-PZ-1-14	Swamp Buffalo	Guizhoubai	Spleen	Spleen	19487458	0.8935	-
Inhouse	PRJNA951806	SAMN34061833	B1-LW-1-1	Swamp Buffalo	Guizhou	Rumen	Stomach	21221672	0.8953	-
Inhouse	PRJNA951806	SAMN34061834	B2-LW-1-1	Swamp Buffalo	Guizhou	Rumen	Stomach	21316596	0.9122	-
Inhouse	PRJNA951806	SAMN34061835	W1-LW-1-1	Swamp Buffalo	Guizhoubai	Rumen	Stomach	21125255	0.9367	-
Inhouse	PRJNA951806	SAMN34061836	W2-LW-1-1	Swamp Buffalo	Guizhoubai	Rumen	Stomach	20314565	0.9383	-
a. ID of RNA-Seq samples used in analysis.
b. Raw tissue names
c. Biological classes based on clustering of gene expression profiles
d. Source of data. 1, Young et al. 2019; 2, Williams et al. 2017; 3, Liu et al. 2019; 4, Behera et al. 2020; 5, Deng et al. 2019; 6, 7, 8, ICAR-CIRB; 9, Huang et al. 2019; 10, Chen et al. 2018; 11, GADVASU; 12, Zhang et al. 2017; 13, Arora et al. 2019; 14, NBAGR; 15, Liang et al. 2021

## Sheet: Table S2
Table S2. Top 10 significantly enriched Gene Ontology terms for three groups of tissue-specific genes.
Tissue	Groupa	GO Term	Description	p.adjust
Adipose	Cattle	GO:0010001	glial cell differentiation	1.44896e-07
Adipose	Cattle	GO:0030198	extracellular matrix organization	1.44896e-07
Adipose	Cattle	GO:0043062	extracellular structure organization	1.44896e-07
Adipose	Cattle	GO:0001503	ossification	1.9626e-07
Adipose	Cattle	GO:0007409	axonogenesis	2.26498e-07
Adipose	Cattle	GO:0060485	mesenchyme development	4.2855e-07
Adipose	Cattle	GO:0045765	regulation of angiogenesis	5.07094e-07
Adipose	Cattle	GO:0031589	cell-substrate adhesion	7.06748e-07
Adipose	Cattle	GO:0034329	cell junction assembly	1.00911e-06
Adipose	Cattle	GO:0006029	proteoglycan metabolic process	2.29436e-06
Adipose	Overlaped	GO:0030198	extracellular matrix organization	6.49346e-30
Adipose	Overlaped	GO:0043062	extracellular structure organization	6.49346e-30
Adipose	Overlaped	GO:0031589	cell-substrate adhesion	6.45584e-21
Adipose	Overlaped	GO:0072001	renal system development	3.18234e-19
Adipose	Overlaped	GO:0001503	ossification	2.29441e-18
Adipose	Overlaped	GO:0060485	mesenchyme development	6.57219e-18
Adipose	Overlaped	GO:0050678	regulation of epithelial cell proliferation	1.27283e-17
Adipose	Overlaped	GO:0010631	epithelial cell migration	1.33217e-16
Adipose	Overlaped	GO:0090132	epithelium migration	1.84316e-16
Adipose	Overlaped	GO:0048706	embryonic skeletal system development	4.25881e-16
Adrenal	Buffalo	GO:0006688	glycosphingolipid biosynthetic process	0.00310489
Adrenal	Buffalo	GO:0035418	protein localization to synapse	0.0112939
Adrenal	Buffalo	GO:0001941	postsynaptic membrane organization	0.0112939
Adrenal	Buffalo	GO:0006695	cholesterol biosynthetic process	0.0112939
Adrenal	Buffalo	GO:1902653	secondary alcohol biosynthetic process	0.0112939
Adrenal	Buffalo	GO:0099638	endosome to plasma membrane protein transport	0.0262582
Adrenal	Buffalo	GO:0006687	glycosphingolipid metabolic process	0.0284164
Adrenal	Buffalo	GO:0007613	memory	0.0306147
Adrenal	Buffalo	GO:1903539	protein localization to postsynaptic membrane	0.0339353
Adrenal	Buffalo	GO:0043113	receptor clustering	0.0361589
Adrenal	Cattle	GO:0010975	regulation of neuron projection development	3.61695e-08
Adrenal	Cattle	GO:0050808	synapse organization	6.40227e-07
Adrenal	Cattle	GO:0007409	axonogenesis	1.41701e-06
Adrenal	Cattle	GO:0031346	positive regulation of cell projection organization	1.7282e-05
Adrenal	Cattle	GO:0060485	mesenchyme development	5.55993e-05
Adrenal	Cattle	GO:0034329	cell junction assembly	5.55993e-05
Adrenal	Cattle	GO:0098742	cell-cell adhesion via plasma-membrane adhesion molecules	0.000102861
Adrenal	Cattle	GO:0099175	regulation of postsynapse organization	0.000638841
Adrenal	Cattle	GO:0050807	regulation of synapse organization	0.000638841
Adrenal	Cattle	GO:0032970	regulation of actin filament-based process	0.000638841
Adrenal	Overlaped	GO:0042391	regulation of membrane potential	1.50521e-19
Adrenal	Overlaped	GO:0050808	synapse organization	2.57746e-18
Adrenal	Overlaped	GO:0006836	neurotransmitter transport	1.78044e-17
Adrenal	Overlaped	GO:0099003	vesicle-mediated transport in synapse	1.98084e-15
Adrenal	Overlaped	GO:0001505	regulation of neurotransmitter levels	5.65549e-15
Adrenal	Overlaped	GO:0007269	neurotransmitter secretion	6.99597e-15
Adrenal	Overlaped	GO:0099643	signal release from synapse	6.99597e-15
Adrenal	Overlaped	GO:0017156	calcium-ion regulated exocytosis	9.53944e-15
Adrenal	Overlaped	GO:0007409	axonogenesis	3.53094e-14
Adrenal	Overlaped	GO:0046879	hormone secretion	8.02566e-13
Blood/Immune	Buffalo	GO:0007059	chromosome segregation	1.48312e-37
Blood/Immune	Buffalo	GO:0140014	mitotic nuclear division	4.29825e-34
Blood/Immune	Buffalo	GO:0098813	nuclear chromosome segregation	3.44957e-33
Blood/Immune	Buffalo	GO:0007088	regulation of mitotic nuclear division	2.24371e-22
Blood/Immune	Buffalo	GO:0051783	regulation of nuclear division	2.72327e-20
Blood/Immune	Buffalo	GO:0051983	regulation of chromosome segregation	8.13565e-19
Blood/Immune	Buffalo	GO:1905818	regulation of chromosome separation	1.13385e-17
Blood/Immune	Buffalo	GO:1902850	microtubule cytoskeleton organization involved in mitosis	1.43197e-17
Blood/Immune	Buffalo	GO:0033044	regulation of chromosome organization	5.94363e-17
Blood/Immune	Buffalo	GO:0071173	spindle assembly checkpoint signaling	5.94363e-17
Blood/Immune	Cattle	GO:0030099	myeloid cell differentiation	1.06603e-07
Blood/Immune	Cattle	GO:0018205	peptidyl-lysine modification	1.12286e-05
Blood/Immune	Cattle	GO:0043123	positive regulation of I-kappaB kinase/NF-kappaB signaling	0.000114387
Blood/Immune	Cattle	GO:0010506	regulation of autophagy	0.000114387
Blood/Immune	Cattle	GO:1903706	regulation of hemopoiesis	0.000114387
Blood/Immune	Cattle	GO:1902459	positive regulation of stem cell population maintenance	0.000114387
Blood/Immune	Cattle	GO:0006338	chromatin remodeling	0.000144257
Blood/Immune	Cattle	GO:0019080	viral gene expression	0.000548691
Blood/Immune	Cattle	GO:0002262	myeloid cell homeostasis	0.000548691
Blood/Immune	Cattle	GO:0030098	lymphocyte differentiation	0.000752204
Blood/Immune	Overlaped	GO:0030098	lymphocyte differentiation	9.37544e-66
Blood/Immune	Overlaped	GO:0002366	leukocyte activation involved in immune response	1.92997e-51
Blood/Immune	Overlaped	GO:0070661	leukocyte proliferation	4.15e-44
Blood/Immune	Overlaped	GO:0046651	lymphocyte proliferation	1.0728e-39
Blood/Immune	Overlaped	GO:0042113	B cell activation	4.61884e-38
Blood/Immune	Overlaped	GO:0046631	alpha-beta T cell activation	8.24971e-38
Blood/Immune	Overlaped	GO:0002274	myeloid leukocyte activation	2.09487e-33
Blood/Immune	Overlaped	GO:0002253	activation of immune response	2.88835e-33
Blood/Immune	Overlaped	GO:0070663	regulation of leukocyte proliferation	5.26748e-32
Blood/Immune	Overlaped	GO:1903706	regulation of hemopoiesis	9.08549e-32
Brain	Buffalo	GO:0007517	muscle organ development	0.023158
Brain	Buffalo	GO:0060271	cilium assembly	0.023158
Brain	Buffalo	GO:0044782	cilium organization	0.0443824
Brain	Cattle	GO:0007389	pattern specification process	1.89722e-07
Brain	Cattle	GO:0003018	vascular process in circulatory system	4.72894e-05
Brain	Cattle	GO:0042475	odontogenesis of dentin-containing tooth	7.61088e-05
Brain	Cattle	GO:0030900	forebrain development	0.000152997
Brain	Cattle	GO:0060485	mesenchyme development	0.000247628
Brain	Cattle	GO:0001654	eye development	0.000341424
Brain	Cattle	GO:0061512	protein localization to cilium	0.000386792
Brain	Cattle	GO:0045664	regulation of neuron differentiation	0.000450316
Brain	Cattle	GO:0043583	ear development	0.000506584
Brain	Cattle	GO:0048839	inner ear development	0.000506584
Brain	Overlaped	GO:0050808	synapse organization	4.80534e-65
Brain	Overlaped	GO:0007409	axonogenesis	3.09486e-46
Brain	Overlaped	GO:0010975	regulation of neuron projection development	1.08678e-45
Brain	Overlaped	GO:0042391	regulation of membrane potential	5.67041e-43
Brain	Overlaped	GO:0048167	regulation of synaptic plasticity	6.47373e-41
Brain	Overlaped	GO:0006836	neurotransmitter transport	1.18741e-37
Brain	Overlaped	GO:0099003	vesicle-mediated transport in synapse	1.42007e-36
Brain	Overlaped	GO:0051960	regulation of nervous system development	3.12475e-35
Brain	Overlaped	GO:0001505	regulation of neurotransmitter levels	7.56378e-35
Brain	Overlaped	GO:0007269	neurotransmitter secretion	2.77166e-34
Heart	Cattle	GO:0032543	mitochondrial translation	1.18597e-06
Heart	Cattle	GO:0140053	mitochondrial gene expression	3.63318e-05
Heart	Cattle	GO:0035904	aorta development	0.000384889
Heart	Cattle	GO:0007411	axon guidance	0.00147875
Heart	Cattle	GO:0097485	neuron projection guidance	0.00147875
Heart	Cattle	GO:0007015	actin filament organization	0.00147875
Heart	Cattle	GO:0032970	regulation of actin filament-based process	0.00195289
Heart	Cattle	GO:0030198	extracellular matrix organization	0.00331216
Heart	Cattle	GO:0043062	extracellular structure organization	0.00331216
Heart	Cattle	GO:0032956	regulation of actin cytoskeleton organization	0.00331216
Heart	Overlaped	GO:0003012	muscle system process	5.20488e-48
Heart	Overlaped	GO:0060047	heart contraction	4.15436e-44
Heart	Overlaped	GO:0060537	muscle tissue development	2.97001e-40
Heart	Overlaped	GO:0015980	energy derivation by oxidation of organic compounds	3.21552e-38
Heart	Overlaped	GO:0008016	regulation of heart contraction	4.86362e-38
Heart	Overlaped	GO:0048738	cardiac muscle tissue development	3.33509e-34
Heart	Overlaped	GO:0051146	striated muscle cell differentiation	2.16219e-31
Heart	Overlaped	GO:0007517	muscle organ development	3.41724e-27
Heart	Overlaped	GO:0070252	actin-mediated cell contraction	3.24622e-25
Heart	Overlaped	GO:0086001	cardiac muscle cell action potential	1.20558e-22
Kidney	Buffalo	GO:0016042	lipid catabolic process	2.11001e-05
Kidney	Buffalo	GO:0006631	fatty acid metabolic process	2.38307e-05
Kidney	Buffalo	GO:0072001	renal system development	2.40951e-05
Kidney	Buffalo	GO:0016054	organic acid catabolic process	0.000356666
Kidney	Buffalo	GO:0044282	small molecule catabolic process	0.000875471
Kidney	Buffalo	GO:0008217	regulation of blood pressure	0.00100788
Kidney	Buffalo	GO:0018108	peptidyl-tyrosine phosphorylation	0.00109734
Kidney	Buffalo	GO:0019216	regulation of lipid metabolic process	0.00134239
Kidney	Buffalo	GO:0001558	regulation of cell growth	0.00163234
Kidney	Buffalo	GO:0003018	vascular process in circulatory system	0.00258848
Kidney	Cattle	GO:0009260	ribonucleotide biosynthetic process	3.91548e-10
Kidney	Cattle	GO:0046390	ribose phosphate biosynthetic process	4.34329e-10
Kidney	Cattle	GO:0045333	cellular respiration	2.55208e-06
Kidney	Cattle	GO:0042073	intraciliary transport	1.75812e-05
Kidney	Cattle	GO:0060271	cilium assembly	1.93359e-05
Kidney	Cattle	GO:0044782	cilium organization	8.32406e-05
Kidney	Cattle	GO:0006119	oxidative phosphorylation	8.65366e-05
Kidney	Cattle	GO:0033108	mitochondrial respiratory chain complex assembly	0.000182116
Kidney	Cattle	GO:0043648	dicarboxylic acid metabolic process	0.000188243
Kidney	Cattle	GO:0099111	microtubule-based transport	0.00020612
Kidney	Overlaped	GO:0046395	carboxylic acid catabolic process	2.34523e-27
Kidney	Overlaped	GO:0001822	kidney development	9.3949e-25
Kidney	Overlaped	GO:0072001	renal system development	9.3949e-25
Kidney	Overlaped	GO:0044282	small molecule catabolic process	1.50931e-24
Kidney	Overlaped	GO:0015711	organic anion transport	5.65148e-18
Kidney	Overlaped	GO:0006814	sodium ion transport	1.72122e-17
Kidney	Overlaped	GO:0048568	embryonic organ development	3.48288e-16
Kidney	Overlaped	GO:0015849	organic acid transport	9.77869e-16
Kidney	Overlaped	GO:0003014	renal system process	1.93893e-14
Kidney	Overlaped	GO:0098656	anion transmembrane transport	1.92501e-13
Large intestine	Buffalo	GO:0030198	extracellular matrix organization	4.75174e-13
Large intestine	Buffalo	GO:0043062	extracellular structure organization	4.75174e-13
Large intestine	Buffalo	GO:0045229	external encapsulating structure organization	4.75174e-13
Large intestine	Buffalo	GO:0032963	collagen metabolic process	8.9855e-08
Large intestine	Buffalo	GO:0031589	cell-substrate adhesion	2.84342e-06
Large intestine	Buffalo	GO:0048565	digestive tract development	3.52393e-06
Large intestine	Buffalo	GO:0050900	leukocyte migration	3.85583e-06
Large intestine	Buffalo	GO:0050878	regulation of body fluid levels	8.47998e-06
Large intestine	Buffalo	GO:0045606	positive regulation of epidermal cell differentiation	3.6432e-05
Large intestine	Buffalo	GO:0002685	regulation of leukocyte migration	7.94295e-05
Large intestine	Cattle	GO:0098742	cell-cell adhesion via plasma-membrane adhesion molecules	0.000201628
Large intestine	Cattle	GO:0034329	cell junction assembly	0.00362918
Large intestine	Cattle	GO:0006334	nucleosome assembly	0.0278879
Large intestine	Cattle	GO:0007416	synapse assembly	0.0278879
Large intestine	Cattle	GO:0001822	kidney development	0.0281574
Large intestine	Cattle	GO:0007200	phospholipase C-activating G protein-coupled receptor signaling pathway	0.0281574
Large intestine	Cattle	GO:0072001	renal system development	0.0281574
Large intestine	Cattle	GO:0030900	forebrain development	0.0281574
Large intestine	Cattle	GO:0021537	telencephalon development	0.0281574
Large intestine	Cattle	GO:0006939	smooth muscle contraction	0.0281574
Large intestine	Overlaped	GO:0048565	digestive tract development	1.96693e-10
Large intestine	Overlaped	GO:0061138	morphogenesis of a branching epithelium	5.99778e-10
Large intestine	Overlaped	GO:0048732	gland development	1.00349e-09
Large intestine	Overlaped	GO:0001763	morphogenesis of a branching structure	1.49506e-09
Large intestine	Overlaped	GO:0061448	connective tissue development	5.23597e-09
Large intestine	Overlaped	GO:0048562	embryonic organ morphogenesis	6.34752e-09
Large intestine	Overlaped	GO:0060485	mesenchyme development	2.04318e-08
Large intestine	Overlaped	GO:0051216	cartilage development	3.31924e-08
Large intestine	Overlaped	GO:0007389	pattern specification process	8.37467e-08
Large intestine	Overlaped	GO:0030850	prostate gland development	1.55926e-07
Liver	Buffalo	GO:0008356	asymmetric cell division	0.0418332
Liver	Cattle	GO:0044282	small molecule catabolic process	3.59166e-08
Liver	Cattle	GO:0046395	carboxylic acid catabolic process	9.36784e-08
Liver	Cattle	GO:0016054	organic acid catabolic process	9.36784e-08
Liver	Cattle	GO:0006631	fatty acid metabolic process	9.94691e-06
Liver	Cattle	GO:0006066	alcohol metabolic process	2.06125e-05
Liver	Cattle	GO:0044242	cellular lipid catabolic process	3.25743e-05
Liver	Cattle	GO:0006577	amino-acid betaine metabolic process	9.86285e-05
Liver	Cattle	GO:0006790	sulfur compound metabolic process	0.00146211
Liver	Cattle	GO:0016125	sterol metabolic process	0.00856074
Liver	Cattle	GO:0006766	vitamin metabolic process	0.00856074
Liver	Overlaped	GO:0044282	small molecule catabolic process	2.62083e-52
Liver	Overlaped	GO:0016054	organic acid catabolic process	6.57156e-49
Liver	Overlaped	GO:0046394	carboxylic acid biosynthetic process	2.20341e-31
Liver	Overlaped	GO:0008202	steroid metabolic process	1.13259e-30
Liver	Overlaped	GO:0006631	fatty acid metabolic process	1.65226e-29
Liver	Overlaped	GO:0016042	lipid catabolic process	1.23461e-23
Liver	Overlaped	GO:0006066	alcohol metabolic process	1.23461e-23
Liver	Overlaped	GO:0042632	cholesterol homeostasis	1.75068e-20
Liver	Overlaped	GO:1900046	regulation of hemostasis	1.32629e-18
Liver	Overlaped	GO:0030193	regulation of blood coagulation	9.086e-18
Lung	Buffalo	GO:0060993	kidney morphogenesis	0.00253353
Lung	Buffalo	GO:0072028	nephron morphogenesis	0.00253353
Lung	Buffalo	GO:0001823	mesonephros development	0.00253353
Lung	Buffalo	GO:0060122	inner ear receptor cell stereocilium organization	0.00329615
Lung	Buffalo	GO:0060088	auditory receptor cell stereocilium organization	0.0051098
Lung	Buffalo	GO:0048771	tissue remodeling	0.00654967
Lung	Buffalo	GO:0007517	muscle organ development	0.0103471
Lung	Buffalo	GO:0030099	myeloid cell differentiation	0.0103471
Lung	Buffalo	GO:0060348	bone development	0.0103471
Lung	Buffalo	GO:0061448	connective tissue development	0.0130183
Lung	Cattle	GO:0002263	cell activation involved in immune response	1.61149e-06
Lung	Cattle	GO:0030098	lymphocyte differentiation	1.99797e-06
Lung	Cattle	GO:0007015	actin filament organization	1.18556e-05
Lung	Cattle	GO:0042073	intraciliary transport	1.20052e-05
Lung	Cattle	GO:0032970	regulation of actin filament-based process	5.75201e-05
Lung	Cattle	GO:0008064	regulation of actin polymerization or depolymerization	0.000101569
Lung	Cattle	GO:0044782	cilium organization	0.000109217
Lung	Cattle	GO:0050900	leukocyte migration	0.000158545
Lung	Cattle	GO:0060271	cilium assembly	0.000197316
Lung	Cattle	GO:0042113	B cell activation	0.00024822
Lung	Overlaped	GO:0031589	cell-substrate adhesion	1.75198e-27
Lung	Overlaped	GO:0030324	lung development	1.35072e-26
Lung	Overlaped	GO:0060541	respiratory system development	4.2193e-25
Lung	Overlaped	GO:0034329	cell junction assembly	6.48032e-23
Lung	Overlaped	GO:0060562	epithelial tube morphogenesis	1.58527e-22
Lung	Overlaped	GO:0003007	heart morphogenesis	5.16454e-22
Lung	Overlaped	GO:0050900	leukocyte migration	2.47723e-21
Lung	Overlaped	GO:0090130	tissue migration	2.2221e-20
Lung	Overlaped	GO:0001763	morphogenesis of a branching structure	2.2221e-20
Lung	Overlaped	GO:0010631	epithelial cell migration	7.20195e-20
Mammary	Buffalo	GO:0015849	organic acid transport	0.00336374
Mammary	Buffalo	GO:0030198	extracellular matrix organization	0.00336374
Mammary	Buffalo	GO:0043062	extracellular structure organization	0.00336374
Mammary	Buffalo	GO:0045229	external encapsulating structure organization	0.00336374
Mammary	Buffalo	GO:0031589	cell-substrate adhesion	0.0065423
Mammary	Buffalo	GO:0048706	embryonic skeletal system development	0.0106695
Mammary	Buffalo	GO:0048704	embryonic skeletal system morphogenesis	0.0220198
Mammary	Buffalo	GO:0030540	female genitalia development	0.0230572
Mammary	Buffalo	GO:0010810	regulation of cell-substrate adhesion	0.0230572
Mammary	Buffalo	GO:0015908	fatty acid transport	0.024541
Mammary	Cattle	GO:2000027	regulation of animal organ morphogenesis	1.88094e-07
Mammary	Cattle	GO:0030198	extracellular matrix organization	2.37651e-05
Mammary	Cattle	GO:0043062	extracellular structure organization	2.37651e-05
Mammary	Cattle	GO:0045229	external encapsulating structure organization	2.37651e-05
Mammary	Cattle	GO:0032970	regulation of actin filament-based process	3.21113e-05
Mammary	Cattle	GO:0031589	cell-substrate adhesion	3.24671e-05
Mammary	Cattle	GO:0050920	regulation of chemotaxis	3.45615e-05
Mammary	Cattle	GO:0001655	urogenital system development	7.87227e-05
Mammary	Cattle	GO:0032956	regulation of actin cytoskeleton organization	0.000114129
Mammary	Cattle	GO:2000647	negative regulation of stem cell proliferation	0.000240269
Mammary	Overlaped	GO:0008544	epidermis development	2.78749e-11
Mammary	Overlaped	GO:0016331	morphogenesis of embryonic epithelium	1.29736e-10
Mammary	Overlaped	GO:0043588	skin development	5.10961e-09
Mammary	Overlaped	GO:0035148	tube formation	6.81328e-09
Mammary	Overlaped	GO:0048706	embryonic skeletal system development	8.38665e-09
Mammary	Overlaped	GO:0001655	urogenital system development	4.16847e-08
Mammary	Overlaped	GO:0030198	extracellular matrix organization	7.61818e-08
Mammary	Overlaped	GO:0043062	extracellular structure organization	7.61818e-08
Mammary	Overlaped	GO:0002064	epithelial cell development	8.94157e-08
Mammary	Overlaped	GO:0048704	embryonic skeletal system morphogenesis	3.61476e-07
Muscle	Buffalo	GO:0045333	cellular respiration	4.37879e-07
Muscle	Buffalo	GO:0006090	pyruvate metabolic process	0.000160589
Muscle	Buffalo	GO:0106106	cold-induced thermogenesis	0.000247582
Muscle	Buffalo	GO:0120161	regulation of cold-induced thermogenesis	0.000247582
Muscle	Buffalo	GO:0006085	acetyl-CoA biosynthetic process	0.000247582
Muscle	Buffalo	GO:0001659	temperature homeostasis	0.000247582
Muscle	Buffalo	GO:1990845	adaptive thermogenesis	0.000347936
Muscle	Buffalo	GO:0009150	purine ribonucleotide metabolic process	0.000494828
Muscle	Buffalo	GO:0003012	muscle system process	0.0012994
Muscle	Buffalo	GO:0035383	thioester metabolic process	0.00162083
Muscle	Cattle	GO:0007178	transmembrane receptor protein serine/threonine kinase signaling pathway	0.0362605
Muscle	Overlaped	GO:0003012	muscle system process	1.63762e-59
Muscle	Overlaped	GO:0007517	muscle organ development	1.41134e-54
Muscle	Overlaped	GO:0055001	muscle cell development	2.71839e-46
Muscle	Overlaped	GO:0060537	muscle tissue development	1.52577e-41
Muscle	Overlaped	GO:0030239	myofibril assembly	1.80962e-33
Muscle	Overlaped	GO:0010927	cellular component assembly involved in morphogenesis	5.52873e-24
Muscle	Overlaped	GO:0031032	actomyosin structure organization	8.52677e-24
Muscle	Overlaped	GO:0090257	regulation of muscle system process	1.6702e-22
Muscle	Overlaped	GO:0050879	multicellular organismal movement	2.17455e-21
Muscle	Overlaped	GO:0050881	musculoskeletal movement	2.17455e-21
Ovary	Buffalo	GO:0030198	extracellular matrix organization	3.36165e-17
Ovary	Buffalo	GO:0043062	extracellular structure organization	3.36165e-17
Ovary	Buffalo	GO:0045229	external encapsulating structure organization	3.36165e-17
Ovary	Buffalo	GO:0001655	urogenital system development	3.90101e-12
Ovary	Buffalo	GO:0090287	regulation of cellular response to growth factor stimulus	8.14586e-10
Ovary	Buffalo	GO:0061448	connective tissue development	3.89344e-08
Ovary	Buffalo	GO:0001503	ossification	1.02246e-07
Ovary	Buffalo	GO:0001654	eye development	1.55484e-07
Ovary	Buffalo	GO:0007411	axon guidance	3.57311e-07
Ovary	Buffalo	GO:0014910	regulation of smooth muscle cell migration	3.72469e-07
Ovary	Cattle	GO:0007043	cell-cell junction assembly	0.0034865
Ovary	Cattle	GO:0140014	mitotic nuclear division	0.019887
Ovary	Cattle	GO:0045216	cell-cell junction organization	0.019887
Ovary	Overlaped	GO:0007548	sex differentiation	1.03827e-12
Ovary	Overlaped	GO:0048608	reproductive structure development	1.03827e-12
Ovary	Overlaped	GO:0030198	extracellular matrix organization	5.88027e-09
Ovary	Overlaped	GO:0043062	extracellular structure organization	5.88027e-09
Ovary	Overlaped	GO:0000070	mitotic sister chromatid segregation	8.22304e-08
Ovary	Overlaped	GO:0034698	response to gonadotropin	1.80537e-07
Ovary	Overlaped	GO:0001503	ossification	2.60816e-07
Ovary	Overlaped	GO:0007059	chromosome segregation	3.37815e-07
Ovary	Overlaped	GO:0010975	regulation of neuron projection development	5.10818e-07
Ovary	Overlaped	GO:0098813	nuclear chromosome segregation	1.3878e-06
Pituitary	Buffalo	GO:0042538	hyperosmotic salinity response	0.0329125
Pituitary	Cattle	GO:0044782	cilium organization	2.24014e-20
Pituitary	Cattle	GO:0007224	smoothened signaling pathway	2.69125e-18
Pituitary	Cattle	GO:0060271	cilium assembly	2.69125e-18
Pituitary	Cattle	GO:0098742	cell-cell adhesion via plasma-membrane adhesion molecules	5.75143e-18
Pituitary	Cattle	GO:0050808	synapse organization	4.33206e-13
Pituitary	Cattle	GO:0010975	regulation of neuron projection development	1.33991e-12
Pituitary	Cattle	GO:0051960	regulation of nervous system development	4.08918e-12
Pituitary	Cattle	GO:0007018	microtubule-based movement	1.37368e-11
Pituitary	Cattle	GO:0007409	axonogenesis	2.36566e-11
Pituitary	Cattle	GO:0050803	regulation of synapse structure or activity	2.68316e-11
Pituitary	Overlaped	GO:0050808	synapse organization	3.26721e-19
Pituitary	Overlaped	GO:0007018	microtubule-based movement	6.04686e-14
Pituitary	Overlaped	GO:0099003	vesicle-mediated transport in synapse	8.62549e-14
Pituitary	Overlaped	GO:0042391	regulation of membrane potential	1.89297e-13
Pituitary	Overlaped	GO:0044782	cilium organization	1.23856e-12
Pituitary	Overlaped	GO:0035082	axoneme assembly	1.23856e-12
Pituitary	Overlaped	GO:0001578	microtubule bundle formation	2.76499e-12
Pituitary	Overlaped	GO:0007409	axonogenesis	1.63878e-11
Pituitary	Overlaped	GO:0045055	regulated exocytosis	1.63878e-11
Pituitary	Overlaped	GO:0007269	neurotransmitter secretion	2.39745e-11
Salivary Gland	Cattle	GO:0003014	renal system process	3.03064e-06
Salivary Gland	Cattle	GO:0006814	sodium ion transport	3.03064e-06
Salivary Gland	Cattle	GO:0045216	cell-cell junction organization	3.03064e-06
Salivary Gland	Cattle	GO:0001655	urogenital system development	5.96778e-06
Salivary Gland	Cattle	GO:0030104	water homeostasis	1.14131e-05
Salivary Gland	Cattle	GO:0008544	epidermis development	2.18891e-05
Salivary Gland	Cattle	GO:0034329	cell junction assembly	3.15406e-05
Salivary Gland	Cattle	GO:0050891	multicellular organismal water homeostasis	3.15406e-05
Salivary Gland	Cattle	GO:0016055	Wnt signaling pathway	3.15406e-05
Salivary Gland	Cattle	GO:0035567	non-canonical Wnt signaling pathway	3.15406e-05
Salivary Gland	Overlaped	GO:0030968	endoplasmic reticulum unfolded protein response	0.0328512
Salivary Gland	Overlaped	GO:0034620	cellular response to unfolded protein	0.0328512
Salivary Gland	Overlaped	GO:0001708	cell fate specification	0.0328512
Salivary Gland	Overlaped	GO:0006486	protein glycosylation	0.0328512
Salivary Gland	Overlaped	GO:0043413	macromolecule glycosylation	0.0328512
Salivary Gland	Overlaped	GO:0007595	lactation	0.0328512
Salivary Gland	Overlaped	GO:0070085	glycosylation	0.0399236
Salivary Gland	Overlaped	GO:0009100	glycoprotein metabolic process	0.0399236
Salivary Gland	Overlaped	GO:0007501	mesodermal cell fate specification	0.0399236
Salivary Gland	Overlaped	GO:0006986	response to unfolded protein	0.0401904
Skin	Buffalo	GO:0008544	epidermis development	3.82405e-39
Skin	Buffalo	GO:0043588	skin development	3.30961e-37
Skin	Buffalo	GO:0009913	epidermal cell differentiation	1.57388e-22
Skin	Buffalo	GO:0042303	molting cycle	5.51078e-15
Skin	Buffalo	GO:0042633	hair cycle	5.51078e-15
Skin	Buffalo	GO:0033561	regulation of water loss via skin	1.09396e-14
Skin	Buffalo	GO:0045109	intermediate filament organization	1.58578e-13
Skin	Buffalo	GO:0030104	water homeostasis	4.74006e-13
Skin	Buffalo	GO:0045103	intermediate filament-based process	5.99554e-13
Skin	Buffalo	GO:0098773	skin epidermis development	9.1858e-13
Skin	Cattle	GO:0140014	mitotic nuclear division	1.27242e-18
Skin	Cattle	GO:0007059	chromosome segregation	3.00623e-15
Skin	Cattle	GO:0007088	regulation of mitotic nuclear division	2.55424e-14
Skin	Cattle	GO:0098813	nuclear chromosome segregation	7.04973e-14
Skin	Cattle	GO:0030198	extracellular matrix organization	1.78692e-13
Skin	Cattle	GO:0051783	regulation of nuclear division	2.56524e-13
Skin	Cattle	GO:0001503	ossification	1.01151e-11
Skin	Cattle	GO:0051983	regulation of chromosome segregation	3.86346e-11
Skin	Cattle	GO:1905818	regulation of chromosome separation	8.85263e-11
Skin	Cattle	GO:0045841	negative regulation of mitotic metaphase/anaphase transition	9.34063e-11
Skin	Overlaped	GO:0043588	skin development	8.38914e-17
Skin	Overlaped	GO:0008544	epidermis development	8.38914e-17
Skin	Overlaped	GO:0048705	skeletal system morphogenesis	8.38914e-17
Skin	Overlaped	GO:0030198	extracellular matrix organization	5.55684e-15
Skin	Overlaped	GO:0043062	extracellular structure organization	5.55684e-15
Skin	Overlaped	GO:0001503	ossification	2.27343e-14
Skin	Overlaped	GO:0061448	connective tissue development	2.27343e-14
Skin	Overlaped	GO:0016055	Wnt signaling pathway	2.27343e-14
Skin	Overlaped	GO:0198738	cell-cell signaling by wnt	2.37607e-14
Skin	Overlaped	GO:0001655	urogenital system development	7.83831e-12
Small intestine	Buffalo	GO:0050878	regulation of body fluid levels	0.0120977
Small intestine	Buffalo	GO:0007599	hemostasis	0.0120977
Small intestine	Buffalo	GO:0007596	blood coagulation	0.0362882
Small intestine	Buffalo	GO:0050817	coagulation	0.0362882
Small intestine	Buffalo	GO:0007204	positive regulation of cytosolic calcium ion concentration	0.0362882
Small intestine	Buffalo	GO:0019218	regulation of steroid metabolic process	0.0362882
Small intestine	Buffalo	GO:0098657	import into cell	0.0362882
Small intestine	Buffalo	GO:0006836	neurotransmitter transport	0.0362882
Small intestine	Buffalo	GO:0030198	extracellular matrix organization	0.0362882
Small intestine	Buffalo	GO:0043062	extracellular structure organization	0.0362882
Small intestine	Cattle	GO:0071214	cellular response to abiotic stimulus	9.51231e-06
Small intestine	Cattle	GO:0104004	cellular response to environmental stimulus	9.51231e-06
Small intestine	Cattle	GO:0050900	leukocyte migration	9.51231e-06
Small intestine	Cattle	GO:0006261	DNA-templated DNA replication	4.12417e-05
Small intestine	Cattle	GO:0002366	leukocyte activation involved in immune response	5.88074e-05
Small intestine	Cattle	GO:0048706	embryonic skeletal system development	0.000258433
Small intestine	Cattle	GO:0090329	regulation of DNA-templated DNA replication	0.00111252
Small intestine	Cattle	GO:0090322	regulation of superoxide metabolic process	0.00111252
Small intestine	Cattle	GO:0002685	regulation of leukocyte migration	0.00111252
Small intestine	Cattle	GO:0007015	actin filament organization	0.0014853
Small intestine	Overlaped	GO:0030098	lymphocyte differentiation	1.0441e-21
Small intestine	Overlaped	GO:0000070	mitotic sister chromatid segregation	3.43362e-18
Small intestine	Overlaped	GO:0060326	cell chemotaxis	3.123e-16
Small intestine	Overlaped	GO:0007059	chromosome segregation	4.15906e-16
Small intestine	Overlaped	GO:0050900	leukocyte migration	1.40298e-15
Small intestine	Overlaped	GO:0098813	nuclear chromosome segregation	7.12405e-15
Small intestine	Overlaped	GO:0051983	regulation of chromosome segregation	4.70839e-14
Small intestine	Overlaped	GO:0070661	leukocyte proliferation	4.70839e-14
Small intestine	Overlaped	GO:0045839	negative regulation of mitotic nuclear division	1.10879e-13
Small intestine	Overlaped	GO:0051784	negative regulation of nuclear division	1.48941e-13
Spleen	Buffalo	GO:0051607	defense response to virus	0.0105595
Spleen	Buffalo	GO:0140546	defense response to symbiont	0.0105595
Spleen	Cattle	GO:0000819	sister chromatid segregation	6.38334e-10
Spleen	Cattle	GO:0000070	mitotic sister chromatid segregation	6.38334e-10
Spleen	Cattle	GO:0098813	nuclear chromosome segregation	5.56356e-08
Spleen	Cattle	GO:0007059	chromosome segregation	8.00552e-08
Spleen	Cattle	GO:2001251	negative regulation of chromosome organization	8.59975e-08
Spleen	Cattle	GO:0007015	actin filament organization	2.13885e-07
Spleen	Cattle	GO:0031589	cell-substrate adhesion	2.13885e-07
Spleen	Cattle	GO:1905818	regulation of chromosome separation	3.15667e-07
Spleen	Cattle	GO:0051983	regulation of chromosome segregation	1.68123e-06
Spleen	Cattle	GO:1901990	regulation of mitotic cell cycle phase transition	2.23e-06
Spleen	Overlaped	GO:0030098	lymphocyte differentiation	6.10478e-49
Spleen	Overlaped	GO:0002366	leukocyte activation involved in immune response	4.59056e-36
Spleen	Overlaped	GO:0070661	leukocyte proliferation	1.20604e-34
Spleen	Overlaped	GO:0046651	lymphocyte proliferation	1.59271e-32
Spleen	Overlaped	GO:0042113	B cell activation	4.16139e-32
Spleen	Overlaped	GO:0002253	activation of immune response	1.95752e-29
Spleen	Overlaped	GO:0070663	regulation of leukocyte proliferation	1.6767e-25
Spleen	Overlaped	GO:0002274	myeloid leukocyte activation	3.65874e-25
Spleen	Overlaped	GO:0050900	leukocyte migration	9.58571e-25
Spleen	Overlaped	GO:1903039	positive regulation of leukocyte cell-cell adhesion	1.10237e-24
Stomach	Buffalo	GO:0045104	intermediate filament cytoskeleton organization	0.00259514
Stomach	Buffalo	GO:0045103	intermediate filament-based process	0.00259514
Stomach	Buffalo	GO:0006936	muscle contraction	0.00772693
Stomach	Buffalo	GO:0003253	cardiac neural crest cell migration involved in outflow tract morphogenesis	0.00867321
Stomach	Buffalo	GO:0006805	xenobiotic metabolic process	0.0234083
Stomach	Buffalo	GO:0008544	epidermis development	0.0257184
Stomach	Buffalo	GO:0009913	epidermal cell differentiation	0.0257184
Stomach	Buffalo	GO:0043588	skin development	0.0257184
Stomach	Buffalo	GO:0060973	cell migration involved in heart development	0.03268
Stomach	Buffalo	GO:0035272	exocrine system development	0.0371056
Stomach	Cattle	GO:0090068	positive regulation of cell cycle process	0.000914685
Stomach	Cattle	GO:0007088	regulation of mitotic nuclear division	0.00162067
Stomach	Cattle	GO:0051783	regulation of nuclear division	0.00162067
Stomach	Cattle	GO:0140014	mitotic nuclear division	0.00384747
Stomach	Cattle	GO:1902850	microtubule cytoskeleton organization involved in mitosis	0.00526094
Stomach	Cattle	GO:0035878	nail development	0.0065147
Stomach	Cattle	GO:0042476	odontogenesis	0.00675253
Stomach	Cattle	GO:0051781	positive regulation of cell division	0.00810453
Stomach	Cattle	GO:0051302	regulation of cell division	0.00810453
Stomach	Cattle	GO:0001942	hair follicle development	0.00810453
Stomach	Overlaped	GO:0008544	epidermis development	5.48927e-30
Stomach	Overlaped	GO:0043588	skin development	3.89804e-24
Stomach	Overlaped	GO:0030216	keratinocyte differentiation	5.18513e-16
Stomach	Overlaped	GO:0042303	molting cycle	3.01111e-09
Stomach	Overlaped	GO:0042633	hair cycle	3.01111e-09
Stomach	Overlaped	GO:0050891	multicellular organismal water homeostasis	7.37774e-09
Stomach	Overlaped	GO:0043616	keratinocyte proliferation	8.09085e-09
Stomach	Overlaped	GO:0045216	cell-cell junction organization	1.61319e-08
Stomach	Overlaped	GO:0030104	water homeostasis	2.36661e-08
Stomach	Overlaped	GO:0010837	regulation of keratinocyte proliferation	1.34651e-07
Testis	Buffalo	GO:2001020	regulation of response to DNA damage stimulus	9.02571e-06
Testis	Buffalo	GO:0006282	regulation of DNA repair	0.000200405
Testis	Buffalo	GO:0006403	RNA localization	0.000273691
Testis	Buffalo	GO:0034470	ncRNA processing	0.000273691
Testis	Buffalo	GO:0006338	chromatin remodeling	0.000273691
Testis	Buffalo	GO:0006261	DNA-templated DNA replication	0.000273691
Testis	Buffalo	GO:0045814	negative regulation of gene expression, epigenetic	0.00161554
Testis	Buffalo	GO:0043414	macromolecule methylation	0.00208354
Testis	Buffalo	GO:0035845	photoreceptor cell outer segment organization	0.00246865
Testis	Buffalo	GO:0035520	monoubiquitinated protein deubiquitination	0.00246865
Testis	Cattle	GO:0034329	cell junction assembly	8.07105e-09
Testis	Cattle	GO:0031346	positive regulation of cell projection organization	3.75602e-06
Testis	Cattle	GO:0007409	axonogenesis	5.87878e-06
Testis	Cattle	GO:0007416	synapse assembly	1.26542e-05
Testis	Cattle	GO:0010975	regulation of neuron projection development	2.40958e-05
Testis	Cattle	GO:0050808	synapse organization	2.40958e-05
Testis	Cattle	GO:0051962	positive regulation of nervous system development	3.86886e-05
Testis	Cattle	GO:1901888	regulation of cell junction assembly	9.66256e-05
Testis	Cattle	GO:0007160	cell-matrix adhesion	0.000271035
Testis	Cattle	GO:0010640	regulation of platelet-derived growth factor receptor signaling pathway	0.00195846
Testis	Overlaped	GO:0022412	cellular process involved in reproduction in multicellular organism	3.30091e-70
Testis	Overlaped	GO:0007018	microtubule-based movement	7.37289e-59
Testis	Overlaped	GO:0044782	cilium organization	7.66706e-57
Testis	Overlaped	GO:0007281	germ cell development	7.9528e-55
Testis	Overlaped	GO:0060271	cilium assembly	8.19301e-55
Testis	Overlaped	GO:0001539	cilium or flagellum-dependent cell motility	7.92076e-47
Testis	Overlaped	GO:0060285	cilium-dependent cell motility	7.92076e-47
Testis	Overlaped	GO:0051321	meiotic cell cycle	1.09597e-38
Testis	Overlaped	GO:0001578	microtubule bundle formation	1.00834e-34
Testis	Overlaped	GO:0007059	chromosome segregation	2.46535e-23
Uterus	Buffalo	GO:0044782	cilium organization	1.39919e-30
Uterus	Buffalo	GO:0060271	cilium assembly	3.12085e-28
Uterus	Buffalo	GO:0003341	cilium movement	1.98564e-27
Uterus	Buffalo	GO:0001539	cilium or flagellum-dependent cell motility	2.58933e-22
Uterus	Buffalo	GO:0060285	cilium-dependent cell motility	2.58933e-22
Uterus	Buffalo	GO:0001578	microtubule bundle formation	7.25471e-20
Uterus	Buffalo	GO:0120316	sperm flagellum assembly	5.75424e-13
Uterus	Buffalo	GO:0007288	sperm axoneme assembly	1.04098e-09
Uterus	Buffalo	GO:0007286	spermatid development	6.09982e-08
Uterus	Buffalo	GO:0022412	cellular process involved in reproduction in multicellular organism	3.39601e-07
Uterus	Cattle	GO:0030198	extracellular matrix organization	1.00222e-25
Uterus	Cattle	GO:0043062	extracellular structure organization	1.00222e-25
Uterus	Cattle	GO:0031589	cell-substrate adhesion	4.27296e-24
Uterus	Cattle	GO:0034329	cell junction assembly	2.66976e-22
Uterus	Cattle	GO:0001655	urogenital system development	8.8994e-22
Uterus	Cattle	GO:0048568	embryonic organ development	6.46534e-19
Uterus	Cattle	GO:0010975	regulation of neuron projection development	4.37574e-18
Uterus	Cattle	GO:0060562	epithelial tube morphogenesis	4.37574e-18
Uterus	Cattle	GO:0090287	regulation of cellular response to growth factor stimulus	2.61095e-17
Uterus	Cattle	GO:0007178	transmembrane receptor protein serine/threonine kinase signaling pathway	2.71229e-17
Uterus	Overlaped	GO:0044782	cilium organization	1.53912e-69
Uterus	Overlaped	GO:0060271	cilium assembly	3.5754e-66
Uterus	Overlaped	GO:0007018	microtubule-based movement	5.38307e-43
Uterus	Overlaped	GO:0001578	microtubule bundle formation	3.17426e-36
Uterus	Overlaped	GO:0007389	pattern specification process	1.83271e-26
Uterus	Overlaped	GO:0001539	cilium or flagellum-dependent cell motility	1.66033e-25
Uterus	Overlaped	GO:0060285	cilium-dependent cell motility	1.66033e-25
Uterus	Overlaped	GO:0099111	microtubule-based transport	4.46485e-20
Uterus	Overlaped	GO:0048562	embryonic organ morphogenesis	3.91579e-18
Uterus	Overlaped	GO:0042073	intraciliary transport	2.31605e-17
a. Buffalo and Cattle represent tissue-specific genes unique to buffalo and cattle, respectively, while Overlapped refers to tissue-specific genes shared by both species.

## Sheet: Table S3
Table S3. Significantly enriched Gene Ontology terms of overlapped preliminary house-keeping genes.
Expression variationa	ID	Description	GeneRatio	BgRatio	pvalue	p.adjust	qvalue	geneID	Count
high	GO:0006790	sulfur compound metabolic process	55/1012	359/21069	2.1348e-14	1.1767e-10	9.35042e-11	AKR1A1/CTNS/B4GALT4/AHCYL2/DLD/GSTZ1/ELOVL5/DCN/ACSS1/ACSL1/ETHE1/CSGALNACT1/DSE/BGN/EDNRB/ADI1/OGDH/SUCLA2/HSD17B4/GSR/CHSY1/CHST7/SLC25A1/SPOCK2/MTHFD1/SQOR/DLAT/CHST2/HMGCS1/GPAM/ACAT1/ACSS2/PDK4/MMUT/UGDH/GCLC/GCDH/ST3GAL4/ACLY/OPLAH/PMVK/AHCY/BTD/PDHA1/FITM2/IDH1/CHPF/ACSF2/PDHB/B4GAT1/TST/HACD1/MCEE/PHGDH/SLC25A10	55
high	GO:0044282	small molecule catabolic process	59/1012	412/21069	5.06158e-14	1.39497e-10	1.10849e-10	AKR1A1/NQO2/PKM/DLD/PFKFB2/BDH2/GSTZ1/ACAA2/GPT2/ACADVL/ENPP4/HACL1/SCP2/ADHFE1/ENO3/ASRGL1/HSD17B4/ACADS/LPIN1/PPARA/GCAT/ECI1/APOE/GDA/PCK2/GOT1/FAH/ACAT1/CYP27A1/SCARB1/ADH5/GCDH/ECHS1/HSD17B10/ACADSB/AHCY/TKFC/ACAA1/ALDH6A1/EHHADH/DECR1/TPI1/ABHD2/GALM/CROT/GLYCTK/AMACR/HMGCL/ACADM/SORD/DECR2/ACOX1/PDXP/ALDH4A1/TST/ACAD11/DPYD/OXCT1/MCEE	59
high	GO:0006099	tricarboxylic acid cycle	15/1012	32/21069	3.95973e-12	5.15441e-09	4.09585e-09	DHTKD1/OGDH/IDH3A/ACO2/SUCLA2/SDHB/MDH2/DLAT/NNT/IDH2/MDH1/PDHA1/IDH1/PDHB/SDHA	15
high	GO:0072329	monocarboxylic acid catabolic process	29/1012	132/21069	4.33865e-12	5.15441e-09	4.09585e-09	AKR1A1/BDH2/ACAA2/ACADVL/HACL1/SCP2/HSD17B4/ACADS/LPIN1/PPARA/ECI1/PCK2/FAH/ACAT1/GCDH/ECHS1/HSD17B10/ACAA1/EHHADH/DECR1/ABHD2/CROT/AMACR/ACADM/SORD/DECR2/ACOX1/ACAD11/MCEE	29
high	GO:0009062	fatty acid catabolic process	26/1012	107/21069	4.82329e-12	5.15441e-09	4.09585e-09	BDH2/ACAA2/ACADVL/HACL1/SCP2/HSD17B4/ACADS/LPIN1/PPARA/ECI1/PCK2/ACAT1/GCDH/ECHS1/HSD17B10/ACAA1/EHHADH/DECR1/ABHD2/CROT/AMACR/ACADM/DECR2/ACOX1/ACAD11/MCEE	26
high	GO:0019395	fatty acid oxidation	27/1012	116/21069	5.61075e-12	5.15441e-09	4.09585e-09	BDH2/ACAA2/ACADVL/HACL1/SCP2/CYGB/HSD17B4/ACADS/PPARA/ADIPOR2/ECI1/ACAT1/PDK4/ADH5/GCDH/POR/ECHS1/HSD17B10/ACAA1/EHHADH/DECR1/CROT/AMACR/ACADM/DECR2/ACOX1/ACAD11	27
high	GO:0006637	acyl-CoA metabolic process	23/1012	105/21069	7.54608e-10	3.19954e-07	2.54245e-07	DLD/ELOVL5/ACSS1/ACSL1/OGDH/SUCLA2/HSD17B4/SLC25A1/DLAT/HMGCS1/GPAM/ACAT1/ACSS2/PDK4/GCDH/ACLY/PMVK/PDHA1/FITM2/ACSF2/PDHB/HACD1/MCEE	23
high	GO:0005996	monosaccharide metabolic process	38/1012	262/21069	1.15552e-09	4.54944e-07	3.61512e-07	AKR1A1/PKM/PFKFB2/SORBS1/SLC25A13/IGFBP3/ENO3/MAN2B1/PFKFB4/PPARA/SLC37A4/SLC25A1/ATF3/IGFBP4/MDH2/SLC2A1/DLAT/KHK/PCK2/ALDOA/PDK4/B4GALT1/GCLC/GPD1/TKFC/PGM1/SLC39A14/PC/TPI1/PDHA1/SIRT6/GALM/GLYCTK/PDHB/ACADM/SORD/FABP5/SLC25A10	38
high	GO:0016042	lipid catabolic process	46/1012	371/21069	3.90686e-09	1.26674e-06	1.00659e-06	BSCL2/BDH2/ACAA2/ACADVL/HACL1/SCP2/PNPLA2/HSD17B11/HSD17B4/ACADS/LPIN1/PPARA/ECI1/APOE/PCK2/LPL/ACAT1/CYP27A1/SCARB1/SRD5A1/GCDH/ACER3/ECHS1/HSD17B10/MGLL/ACAA1/EHHADH/DECR1/SIRT6/ABHD2/FITM2/NCEH1/IDH1/PRKCE/CROT/INPP5F/AMACR/GM2A/ACADM/DECR2/ACOX1/ACAD11/YWHAH/OXCT1/MCEE/PLCD1	46
high	GO:0007015	actin filament organization	54/1012	488/21069	1.03593e-08	2.85501e-06	2.26868e-06	RHOG/HCLS1/CORO6/PSTPIP2/SORBS1/FSCN1/ELMO1/SH3KBP1/RHOBTB3/CORO1B/CXCL12/S1PR1/RFLNB/LCP1/EMP2/CORO1A/PAK1/DPYSL3/SSH2/RAC2/PFN2/ALMS1/FLNA/CLASP2/TPM2/PLS3/ALDOA/SYNPO/CALD1/TMOD1/PTGER4/CFL2/SDC4/MYO1D/KCTD13/COTL1/CCDC88A/RHOBTB1/BIN1/VASP/NRP1/GSN/ARRB1/AIF1/PRKCE/CYRIB/ARHGAP25/SVIL/SHANK3/PDXP/RGCC/LIMK1/MARCKSL1/TWF2	54
high	GO:0060348	bone development	35/1012	252/21069	1.62679e-08	4.07584e-06	3.23878e-06	VKORC1/SERPINH1/TSKU/INSIG1/MAP2K6/TMEM107/TRIM45/GJA1/FBN1/KIT/ECM1/ACP5/BGN/RFLNB/CHSY1/SULF2/NOTCH2/NSD2/FLI1/MEIS1/SH3PXD2B/FLNA/PLS3/COL1A1/MMP14/PTGER4/SRD5A1/TGM2/POR/PIP4K2A/PTPN6/MEF2C/COL3A1/DHRS3/TMEM38B	35
high	GO:0043434	response to peptide hormone	50/1012	442/21069	1.79153e-08	4.29344e-06	3.41169e-06	NR4A1/INSIG1/PKM/FBN1/SORBS1/UCP2/ZNF106/FOS/CXCL12/EDNRB/TBC1D4/ERRFI1/RAP1GDS1/LPIN1/POMC/PPARA/SLC2A1/EGR1/KHK/PCK2/GOT1/CYC1/LPL/COL1A1/RHOQ/PDK4/SRD5A1/GCLC/ANXA1/BSG/SLC27A1/POR/CA2/PIP4K2A/TNFSF10/SLC39A14/CPEB2/CYBB/LYN/SIK2/CAT/CTSK/ADM/CSK/COL3A1/IGF1R/GKAP1/TGFBR3/CYBA/VAMP2	50
high	GO:0032970	regulation of actin filament-based process	49/1012	434/21069	2.64727e-08	6.07989e-06	4.83126e-06	RHOG/HCLS1/ATP2A2/STAU2/FSCN1/RHOBTB3/CORO1B/CXCL12/S1PR1/ARHGDIB/PDGFRA/NOTCH2/CORO1A/PDE4B/PAK1/SRI/LRP1/SSH2/RAC2/PFN2/ALMS1/FLNA/CLASP2/CSF1R/SYNPO/RHOQ/ACTA2/TMOD1/PTGER4/CFL2/SDC4/COTL1/CCDC88A/JUP/RHOBTB1/BIN1/VASP/NRP1/GSN/PRKCE/CNN2/CYRIB/SVIL/SHANK3/PDXP/FRMD6/RGCC/LIMK1/TWF2	49
high	GO:0006066	alcohol metabolic process	46/1012	395/21069	2.76745e-08	6.10167e-06	4.84857e-06	AKR1A1/TSKU/INSIG1/ACAA2/MSMO1/ACADVL/ACSS1/DHCR24/TM7SF2/PNPLA2/EDNRB/IDH3A/ACO2/FDXR/ALDH1A1/LBR/NSDHL/APOE/FDX1/HMGCS1/PCK2/GOT1/ACSS2/CYP27A1/IDH2/SCARB1/ADH5/DAB2/GPD1/ACLY/POR/ACER3/ISYNA1/PMVK/LCAT/TKFC/SC5D/TPI1/IDH1/DHRS7/CAT/RETSAT/NPC2/DHRS3/SORD/GCH1	46
high	GO:0006085	acetyl-CoA biosynthetic process	9/1012	18/21069	4.31471e-08	8.8084e-06	6.99942e-06	DLD/ACSS1/DLAT/ACAT1/ACSS2/PDK4/ACLY/PDHA1/PDHB	9
high	GO:0050818	regulation of coagulation	17/1012	76/21069	8.83947e-08	1.47646e-05	1.17324e-05	VKORC1/THBS1/ENPP4/PLAU/F3/PDGFRA/PROCR/SERPINE2/APOE/EMILIN1/CD9/SERPING1/ST3GAL4/F2R/PDGFB/ANXA5/THBD	17
high	GO:0070482	response to oxygen levels	42/1012	369/21069	2.08879e-07	3.02985e-05	2.40761e-05	POLB/ALAD/CRYAB/NDRG1/AQP1/CXCR4/THBS1/NDUFS2/ATP1B1/ACAA2/UCP2/EPAS1/FOS/CXCL12/CYGB/PLAU/PINK1/AIFM1/PLOD2/PPARA/EGLN3/SLC2A1/EGR1/SUV39H2/FAM162A/COL1A1/ACVRL1/MMP14/SLC29A1/HMOX1/LMNA/AHCY/CPEB2/CYBB/PRKCE/HIF1A/CAT/ADM/TGFBR3/RGCC/VASN/CYBA	42
high	GO:1903034	regulation of response to wounding	27/1012	185/21069	2.53719e-07	3.5859e-05	2.84946e-05	VKORC1/CXCR4/THBS1/ENPP4/PLAU/F3/PDGFRA/SERPINE2/KREMEN1/APOE/FLNA/EMILIN1/CLASP2/CLDN1/ACTA2/CD9/ANXA1/SERPING1/ST3GAL4/PTPRS/GRN/F2R/PRKCE/IGF1R/PDGFB/INPP5F/THBD	27
high	GO:0032963	collagen metabolic process	21/1012	121/21069	2.91986e-07	4.02356e-05	3.19724e-05	CST3/SERPINH1/CYGB/CREB3L1/ERRFI1/VSIR/EMILIN1/COL1A1/COL1A2/MMP14/RETREG1/CTSS/VIM/F2R/TGFB1/HIF1A/CTSK/RCN3/PEPD/RGCC/ARRB2	21
high	GO:0003012	muscle system process	50/1012	485/21069	3.31459e-07	4.35932e-05	3.46404e-05	CRYAB/NR4A1/CXCR4/ATP1A1/ATP2A2/MAP2K6/EHD3/GJA1/PI16/ATP1B1/KIT/SMTN/GAMT/EDNRB/GATM/GRK2/ERRFI1/SULF2/RAP1GDS1/PPARA/CALCRL/PDE4B/SRI/FLNA/TPM2/PDLIM5/ALDOA/ORMDL3/CALD1/RCSD1/ACTA2/TMOD1/HMOX1/MYH11/PPP3CA/FBXO32/LMNA/JUP/BIN1/GSN/F2R/AIF1/SLMAP/DOCK4/INPP5F/TNFRSF1B/HOMER1/TMEM38B/SNTB1/CYBA	50
high	GO:0008202	steroid metabolic process	41/1012	362/21069	3.32168e-07	4.35932e-05	3.46404e-05	ATP1A1/TSKU/INSIG1/KIT/ACAA2/MSMO1/ACADVL/SCP2/CHST10/DHCR24/TM7SF2/EDNRB/HSD17B11/FDXR/HSD17B4/PDGFRA/LBR/NSDHL/EGR1/APOE/FDX1/HMGCS1/CYP27A1/SCARB1/SRD5A1/DAB2/ACLY/POR/HSD17B10/PMVK/LCAT/ACAA1/EBPL/SC5D/CAT/ADM/IGF1R/AMACR/NPC2/YWHAH/LGMN	41
high	GO:0072659	protein localization to plasma membrane	37/1012	311/21069	3.68689e-07	4.63744e-05	3.68505e-05	TSPAN15/RHOG/RAPGEF6/EHD3/LGALS3/ATP1B1/SORBS1/HYCC1/EMP2/RILPL1/NSF/LRP1/RAB8B/FLNA/CLASP2/SLC9A3R1/RHOQ/NECTIN3/ATP1B3/MMP14/DAB2/BSG/CCDC88A/JUP/EPB41L3/CLIP3/PALM/RAMP2/RAP2A/TGFB1/PRKCE/RAMP3/SLMAP/HYCC2/CSK/TAMALIN/VAMP2	37
high	GO:0016051	carbohydrate biosynthetic process	30/1012	225/21069	4.17696e-07	5.00509e-05	3.97719e-05	AKR1A1/GYG1/SORBS1/SLC25A13/CHST10/CSGALNACT1/AGL/PPARA/SLC37A4/SLC25A1/ATF3/MDH2/PPP1R3B/PCK2/GOT1/B4GALT1/GPD1/ST3GAL4/ISYNA1/PGM1/SLC39A14/PC/TPI1/SIRT6/TGFB1/PDGFB/ACADM/SORD/GYS1/SLC25A10	30
high	GO:0046390	ribose phosphate biosynthetic process	33/1012	268/21069	7.17424e-07	7.6047e-05	6.04292e-05	CTPS1/DLD/NDUFS2/ATP5MC3/ELOVL5/TKT/SLC25A13/ACSS1/NDUFA8/ACSL1/NDUFA9/PINK1/ADCY7/PPARA/SDHB/SLC25A1/NDUFB10/MTHFD1/DLAT/ACAT1/ALDOA/ACSS2/PDK4/GCDH/ACLY/NDUFS7/PDHA1/TGFB1/PDHB/NDUFV1/NDUFS1/HACD1/SDHA	33
high	GO:1990845	adaptive thermogenesis	25/1012	174/21069	9.4155e-07	9.34097e-05	7.42261e-05	CXCR4/MAP2K6/GJA1/BSCL2/GADD45G/UCP2/EPAS1/ACSL1/ZNF516/GATM/TLR4/LPIN1/ALDH1A1/PM20D1/ADIPOR2/PLCL2/NR1H3/ALMS1/DECR1/SIRT6/IGF1R/SLC25A5/FABP5/CEBPB/SCD	25
high	GO:0032956	regulation of actin cytoskeleton organization	42/1012	391/21069	9.91397e-07	9.34097e-05	7.42261e-05	RHOG/HCLS1/STAU2/FSCN1/RHOBTB3/CORO1B/CXCL12/S1PR1/ARHGDIB/PDGFRA/NOTCH2/CORO1A/PAK1/LRP1/SSH2/RAC2/PFN2/ALMS1/FLNA/CLASP2/CSF1R/SYNPO/RHOQ/TMOD1/PTGER4/CFL2/SDC4/COTL1/CCDC88A/RHOBTB1/BIN1/VASP/NRP1/GSN/PRKCE/CYRIB/SVIL/SHANK3/PDXP/RGCC/LIMK1/TWF2	42
high	GO:0048872	homeostasis of number of cells	38/1012	337/21069	9.91685e-07	9.34097e-05	7.42261e-05	POLB/CSF1/TCIRG1/HCLS1/OCIAD2/ETS1/KIT/MAFB/EPAS1/ALAS1/TAL1/P4HTM/CORO1A/PDE4B/GLIS2/MTHFD1/SLC40A1/GPAM/DYRK3/ISG15/CD74/HMOX1/MFHAS1/ANXA1/AKT3/RIPK3/PPP3CB/LYN/F2R/MEF2C/HIF1A/SPI1/FSTL1/TGFBR3/GPRASP2/SLC25A5/SOX4/KLF2	38
high	GO:1903510	mucopolysaccharide metabolic process	18/1012	99/21069	1.00471e-06	9.34097e-05	7.42261e-05	B4GALT4/DCN/CSGALNACT1/CEMIP2/DSE/BGN/EDNRB/CHSY1/CHST7/SPOCK2/CD44/CHST2/UGDH/ST3GAL4/TGFB1/CHPF/PDGFB/B4GAT1	18
high	GO:0006734	NADH metabolic process	11/1012	38/21069	1.0823e-06	9.34097e-05	7.42261e-05	NUDT13/PKM/ENO3/OGDH/MDH2/PCK2/GPD1/MDH1/PC/TPI1/NQO1	11
high	GO:0030193	regulation of blood coagulation	15/1012	71/21069	1.10069e-06	9.34097e-05	7.42261e-05	VKORC1/THBS1/ENPP4/PLAU/F3/PDGFRA/SERPINE2/APOE/EMILIN1/CD9/SERPING1/ST3GAL4/F2R/PDGFB/THBD	15
high	GO:0061437	renal system vasculature development	10/1012	31/21069	1.10153e-06	9.34097e-05	7.42261e-05	AQP1/PDGFRA/NOTCH2/EGR1/PECAM1/ACTA2/IL6R/NRP1/PDGFB/NOTCH3	10
high	GO:0061440	kidney vasculature development	10/1012	31/21069	1.10153e-06	9.34097e-05	7.42261e-05	AQP1/PDGFRA/NOTCH2/EGR1/PECAM1/ACTA2/IL6R/NRP1/PDGFB/NOTCH3	10
high	GO:0001659	temperature homeostasis	27/1012	200/21069	1.22341e-06	9.89105e-05	7.85973e-05	CXCR4/MAP2K6/GJA1/BSCL2/GADD45G/ACADVL/UCP2/EPAS1/ACSL1/ZNF516/EDNRB/GATM/TLR4/LPIN1/ALDH1A1/ADIPOR2/PLCL2/EGR1/NR1H3/ALMS1/SLC27A1/DECR1/SIRT6/IGF1R/FABP5/CEBPB/SCD	27
high	GO:0030198	extracellular matrix organization	40/1012	367/21069	1.23818e-06	9.89105e-05	7.85973e-05	SPINT2/CST3/BMP1/SERPINH1/FSCN1/CREB3L1/LCP1/PDGFRA/SULF2/SPOCK2/SH3PXD2B/MIA/BCL3/TGFBI/CCDC80/LRP1/EMILIN1/CLASP2/LAMC1/AEBP1/COL1A1/COL1A2/QSOX1/MMP14/FMOD/B4GALT1/MYH11/CTSV/CTSS/RAMP2/TGFB1/CTSK/CRISPLD2/VWA1/COL3A1/NID2/COL18A1/TNFRSF1B/TMEM38B/RGCC	40
high	GO:0042180	cellular ketone metabolic process	29/1012	225/21069	1.31407e-06	0.00010298	8.18309e-05	VKORC1/AKR1A1/NQO2/INSIG1/ACADVL/ELOVL5/COQ10A/EDNRB/NDUFA9/FDXR/PPARA/EGR1/NR1H3/PDK4/SLC7A7/CD74/SRD5A1/ANXA1/DAB2/GPD1/HSD17B10/TPI1/SIRT6/PRKCE/NQO1/ADM/COQ8A/OXCT1/FABP5	29
high	GO:0043648	dicarboxylic acid metabolic process	18/1012	101/21069	1.36174e-06	0.000104249	8.28391e-05	GPT2/ADHFE1/OGDH/SUCLA2/SDHB/MDH2/MTHFD1/PCK2/GOT1/IDH2/ASL/GCLC/ACLY/MDH1/GRHPR/IDH1/ALDH4A1/SDHA	18
high	GO:1900046	regulation of hemostasis	15/1012	73/21069	1.59939e-06	0.000117544	9.34042e-05	VKORC1/THBS1/ENPP4/PLAU/F3/PDGFRA/SERPINE2/APOE/EMILIN1/CD9/SERPING1/ST3GAL4/F2R/PDGFB/THBD	15
high	GO:0006090	pyruvate metabolic process	19/1012	113/21069	1.74665e-06	0.000125033	9.93551e-05	DHTKD1/PKM/DLD/PFKFB2/ENO3/OGDH/PPARA/DLAT/PCK2/ALDOA/PDK4/GPD1/PGM1/PC/TPI1/PDHA1/SIRT6/HIF1A/PDHB	19
high	GO:0097529	myeloid leukocyte migration	33/1012	280/21069	1.92012e-06	0.000135689	0.000107822	CSF1/RHOG/MYD88/THBS1/LGALS3/KIT/CXCL12/EDNRB/EMP2/PDE4B/RIN3/RAC2/EMILIN1/PECAM1/CSF1R/DUSP1/CD9/MMP14/PTGER4/CD74/B4GALT1/ANXA1/BSG/IL6R/LYN/AIF1/CNN2/PDGFB/SPI1/FCER1G/CCL2/MTUS1/LGMN	33
high	GO:0046886	positive regulation of hormone biosynthetic process	6/1012	10/21069	2.15169e-06	0.000150128	0.000119296	EGR1/DAB2/POR/HIF1A/ADM/IGF1R	6
high	GO:0071260	cellular response to mechanical stimulus	15/1012	75/21069	2.2919e-06	0.000157912	0.000125482	MYD88/AQP1/TLR4/SLC2A1/HABP4/COL1A1/GADD45A/PTGER4/GCLC/CASP8/CNN2/PIEZO1/IGF1R/IRF1/CYBA	15
high	GO:0022604	regulation of cell morphogenesis	37/1012	336/21069	2.41545e-06	0.000163026	0.000129545	RHOG/PRAG1/CXCR4/STAU2/KIT/DVL2/MSN/SH3KBP1/RHOBTB3/CORO1B/LIMS2/MYO9A/FN1/ZMYM3/CORO1A/RAC2/FLNA/SLC9A3R1/CD44/CSF1R/ALDOA/RHOQ/FGD6/SPARC/ANXA1/DAB2/RHOBTB1/EPB41L3/CAPRIN2/PALM/NRP1/FITM2/FMNL2/GPRASP2/CCL2/FZD4/OBSL1	37
high	GO:0002685	regulation of leukocyte migration	32/1012	270/21069	2.42527e-06	0.000163026	0.000129545	CSF1/RHOG/MYD88/THBS1/LGALS3/MSN/ECM1/CXCL12/CORO1A/RIN3/RAC2/EMILIN1/CHST2/CSF1R/DUSP1/CD9/MMP14/PTGER4/CD74/HMOX1/ANXA1/ST3GAL4/STK10/RIPK3/IL6R/LYN/AIF1/CNN2/SPI1/CCL2/MTUS1/LGMN	32
high	GO:0045766	positive regulation of angiogenesis	26/1012	196/21069	2.67141e-06	0.000171219	0.000136056	AQP1/CXCR4/JCAD/PKM/THBS1/ETS1/ECM1/F3/EMP2/ANXA3/CTSH/EMILIN1/ACVRL1/HMOX1/JUP/AKT3/HSPB6/GRN/NRP1/RAMP2/SIRT6/CYBB/HIF1A/RRAS/ADM/DLL1	26
high	GO:1904018	positive regulation of vasculature development	26/1012	196/21069	2.67141e-06	0.000171219	0.000136056	AQP1/CXCR4/JCAD/PKM/THBS1/ETS1/ECM1/F3/EMP2/ANXA3/CTSH/EMILIN1/ACVRL1/HMOX1/JUP/AKT3/HSPB6/GRN/NRP1/RAMP2/SIRT6/CYBB/HIF1A/RRAS/ADM/DLL1	26
high	GO:0032964	collagen biosynthetic process	12/1012	51/21069	3.94932e-06	0.000241874	0.0001922	SERPINH1/CYGB/CREB3L1/ERRFI1/EMILIN1/COL1A1/VIM/F2R/TGFB1/RCN3/RGCC/ARRB2	12
high	GO:0030099	myeloid cell differentiation	47/1012	486/21069	4.37937e-06	0.000256799	0.00020406	CSF1/TCIRG1/GPR137B/HCLS1/FBN1/ETS1/KIT/MAFB/EPAS1/ALAS1/FOS/TAL1/P4HTM/TLR4/MITF/NOTCH2/FLI1/MEIS1/LBR/EVI2B/FLNA/C1QC/CSF1R/JAG1/DYRK3/ISG15/CD74/CASP8/MFHAS1/FASN/PPP3CA/PIP4K2A/LYN/PTPN6/TGFB1/MEF2C/HIF1A/PRXL2A/SPI1/TGFBR3/DLL1/RELB/MAF/SLC25A5/NDFIP1/CEBPB/KLF2	47
high	GO:0010810	regulation of cell-substrate adhesion	29/1012	239/21069	4.46283e-06	0.000258938	0.00020576	CSF1/THBS1/FZD7/STK4/PLEKHA2/PEAK1/PLAU/LIMS2/EMP2/FN1/SPOCK2/CCDC80/RAC2/FLNA/EMILIN1/CLASP2/JAG1/COL1A1/ACVRL1/MMP14/SDC4/DAB2/RELL2/JUP/NRP1/PRKCE/RRAS/PDGFB/FZD4	29
high	GO:0009612	response to mechanical stimulus	28/1012	227/21069	4.72458e-06	0.000271269	0.000215559	CSF1/MYD88/AQP1/CXCR4/THBS1/KIT/FOS/CXCL12/TLR4/SERPINE2/SLC2A1/HABP4/PSPH/COL1A1/GADD45A/MMP14/PTGER4/GCLC/CASP8/JUP/GSN/CNN2/PIEZO1/IGF1R/SHANK3/IRF1/LRP11/CYBA	28
high	GO:1901654	response to ketone	27/1012	215/21069	4.95455e-06	0.000272373	0.000216436	AQP1/THBS1/GNG2/MSN/FOS/ERRFI1/AIFM1/NR1H3/FDX1/PCK2/PSPH/CLDN1/PTGER4/SRD5A1/FBXO32/POR/CCND1/CYBB/ABHD2/TGFB1/PRKCE/NQO1/IGF1R/MBP/TGFBR3/CYBA/KLF2	27
high	GO:0006695	cholesterol biosynthetic process	13/1012	61/21069	5.13894e-06	0.000272373	0.000216436	INSIG1/ACAA2/MSMO1/DHCR24/TM7SF2/LBR/NSDHL/APOE/HMGCS1/ACLY/POR/PMVK/SC5D	13
high	GO:1902653	secondary alcohol biosynthetic process	13/1012	61/21069	5.13894e-06	0.000272373	0.000216436	INSIG1/ACAA2/MSMO1/DHCR24/TM7SF2/LBR/NSDHL/APOE/HMGCS1/ACLY/POR/PMVK/SC5D	13
high	GO:0006694	steroid biosynthetic process	26/1012	203/21069	5.13911e-06	0.000272373	0.000216436	ATP1A1/INSIG1/ACAA2/MSMO1/SCP2/DHCR24/TM7SF2/HSD17B11/FDXR/LBR/NSDHL/EGR1/APOE/FDX1/HMGCS1/CYP27A1/SRD5A1/DAB2/ACLY/POR/HSD17B10/PMVK/SC5D/ADM/IGF1R/AMACR	26
high	GO:0031099	regeneration	26/1012	203/21069	5.13911e-06	0.000272373	0.000216436	MAPK8IP3/FZD7/HOPX/BCL9/UCP2/CXCL12/LCP1/LPIN1/PTGFRN/CDKN1A/KREMEN1/ANXA3/FLNA/CLDN1/CD9/HMOX1/ANXA1/PPP3CA/CCND1/PTPRS/GRN/ADM/IGF1R/INPP5F/TGFBR3/CEBPB	26
high	GO:0046890	regulation of lipid biosynthetic process	25/1012	192/21069	5.78017e-06	0.000300569	0.000238841	ATP1A1/INSIG1/SORBS1/ACADVL/ELOVL5/LPIN1/PPARA/SAMD8/EGR1/APOE/NR1H3/ORMDL3/PDK4/SCARB1/CD74/ANXA1/DAB2/SLC27A1/POR/FITM2/IDH1/ADM/IGF1R/PDGFB/FABP5	25
high	GO:0002263	cell activation involved in immune response	36/1012	339/21069	7.50339e-06	0.000375988	0.000298771	MYD88/LGALS3/KIT/TLR4/LCP1/NOTCH2/NSD2/CORO1A/BCL3/FGL2/PLCL2/ANXA3/HLA-DRA/LRP1/RAC2/HLA-DMB/PTGER4/MFNG/LGALS1/CD74/HMOX1/ANXA1/IL6R/GRN/LYN/DNASE1/PTPN6/TGFB1/PRKCE/SPI1/FCER1G/DLL1/RELB/CLCF1/NDFIP1/VAMP2	36
high	GO:0010712	regulation of collagen metabolic process	11/1012	46/21069	8.43012e-06	0.000414882	0.000329678	CST3/CYGB/CREB3L1/ERRFI1/VSIR/EMILIN1/VIM/F2R/TGFB1/RGCC/ARRB2	11
high	GO:0009409	response to cold	12/1012	55/21069	9.14057e-06	0.000445865	0.000354298	ACADVL/UCP2/FOS/ZNF516/METRNL/HSPA2/LPL/CASP8/SLC27A1/ADM/ACADM/LRP11	12
high	GO:0090130	tissue migration	40/1012	401/21069	1.08252e-05	0.000514385	0.000408745	NR4A1/JCAD/THBS1/ETS1/KIT/DCN/CORO1B/CLEC14A/VSTM4/EMP2/MAPRE2/ARSB/CORO1A/APOE/ANXA3/CTSH/PFN2/CLASP2/NRP2/ACVRL1/GADD45A/SCARB1/ACTA2/SPARC/HMOX1/ANXA1/JUP/AKT3/GRN/NRP1/TGFB1/PRKCE/MEF2C/HIF1A/RRAS/PDGFB/FSTL1/RGCC/S100A2/LGMN	40
high	GO:0030204	chondroitin sulfate metabolic process	9/1012	32/21069	1.35369e-05	0.000632335	0.000502472	DCN/CSGALNACT1/DSE/BGN/CHSY1/CHST7/SPOCK2/UGDH/CHPF	9
high	GO:0045637	regulation of myeloid cell differentiation	29/1012	254/21069	1.46057e-05	0.000670887	0.000533107	CSF1/GPR137B/HCLS1/FBN1/ETS1/MAFB/FOS/TAL1/P4HTM/TLR4/MITF/NOTCH2/MEIS1/EVI2B/C1QC/JAG1/ISG15/CD74/CASP8/PPP3CA/LYN/TGFB1/MEF2C/HIF1A/PRXL2A/SPI1/DLL1/NDFIP1/CEBPB	29
high	GO:0010631	epithelial cell migration	39/1012	393/21069	1.56473e-05	0.000709495	0.000563786	NR4A1/JCAD/THBS1/ETS1/KIT/DCN/CORO1B/CLEC14A/VSTM4/EMP2/MAPRE2/ARSB/CORO1A/APOE/ANXA3/CTSH/PFN2/CLASP2/NRP2/ACVRL1/GADD45A/SCARB1/SPARC/HMOX1/ANXA1/JUP/AKT3/GRN/NRP1/TGFB1/PRKCE/MEF2C/HIF1A/RRAS/PDGFB/FSTL1/RGCC/S100A2/LGMN	39
high	GO:0070997	neuron death	43/1012	451/21069	1.57036e-05	0.000709495	0.000563786	POLB/CSF1/RAB29/FOS/DHCR24/PINK1/TLR4/CASP7/AIFM1/C1QA/RILPL1/PPARA/EGLN3/ATP13A2/CORO1A/BOK/PM20D1/EGR1/APOE/FAM162A/LANCL1/GCLC/HMOX1/CASP8/RETREG1/ADARB1/CCND1/CTSZ/GRN/NRP1/TNFRSF21/F2R/NQO1/MEF2C/HIF1A/TNFRSF1B/GPRASP2/ARRB2/CCL2/CLCF1/WFS1/LGMN/CEBPB	43
high	GO:0006909	phagocytosis	35/1012	337/21069	1.61637e-05	0.000718742	0.000571134	RHOG/MYD88/THBS1/MFGE8/ELMO1/TLR4/IL2RG/CORO1A/ANXA3/PAK1/NR1H3/LRP1/RAC2/PECAM1/SCARB1/CD14/ICAM3/ANXA1/TGM2/LYST/MYO18A/RHOBTB1/GSN/ITGAV/LYN/AIF1/PRKCE/CNN2/CSK/ARHGAP25/FCER1G/CCL2/CD302/LIMK1/CYBA	35
high	GO:0071496	cellular response to external stimulus	36/1012	351/21069	1.61691e-05	0.000718742	0.000571134	CD68/MYD88/AQP1/TRIM24/UCP2/FOS/PLIN2/TLR4/AIFM1/PPARA/CDKN1A/ATF3/SLC2A1/HABP4/LPL/COL1A1/MIOS/GADD45A/SIPA1/PDK4/PTGER4/SRD5A1/GCLC/HMOX1/CASP8/STK26/LYN/SIK2/AIF1/CNN2/PIEZO1/CTSK/IGF1R/IRF1/DCTPP1/CYBA	36
high	GO:0061298	retina vasculature development in camera-type eye	7/1012	19/21069	1.75007e-05	0.00077171	0.000613224	VSTM4/PDGFRA/CLIC4/ACVRL1/NRP1/HIF1A/FZD4	7
high	GO:0009636	response to toxic substance	31/1012	286/21069	2.11966e-05	0.000905702	0.000719698	EPHX1/ALAD/AKR1A1/SLC22A5/GSTZ1/FOS/SLC18A2/CYGB/PINK1/KDM5B/AIFM1/GSR/ALDH1A1/MGST1/APOE/MGST3/SRXN1/CLDN1/SRD5A1/ADH5/MTARC2/LYN/NQO1/CAT/PRXL2A/MBP/CNP/GCH1/GPX3/SNN/TXNDC17	31
high	GO:0040013	negative regulation of locomotion	43/1012	457/21069	2.16122e-05	0.000916357	0.000728165	SPINT2/GJA1/THBS1/DCN/IGFBP3/CORO1B/CXCL12/CYGB/SAP130/ARHGDIB/MITF/CLIC4/APOE/RIN3/DPYSL3/LRP1/PFN2/EMILIN1/CLASP2/SLC9A3R1/JAG1/ACVRL1/GADD45A/DUSP1/PTGER4/CD74/HMOX1/RYK/ADARB1/JUP/SEMA3F/STK26/NRP1/ABHD2/RAP2A/TGFB1/AIF1/MEF2C/CNN2/RRAS/COL3A1/RGCC/CCL2	43
high	GO:0061448	connective tissue development	31/1012	288/21069	2.42931e-05	0.00101889	0.000809637	CSF1/BMP1/SERPINH1/TSKU/ECM1/ZNF516/BGN/RFLNB/CHSY1/SULF2/SH3PXD2B/TGFBI/EGR1/CD44/ACAT1/COL1A1/ACVRL1/ARID5A/ACTA2/POR/IL6R/SLC39A14/TGFB1/MEF2C/HIF1A/CTSK/COL3A1/PDGFB/SPI1/OXCT1/MAF	31
high	GO:0030336	negative regulation of cell migration	39/1012	401/21069	2.47203e-05	0.0010245	0.000814096	GJA1/THBS1/DCN/IGFBP3/CORO1B/CXCL12/CYGB/SAP130/ARHGDIB/MITF/CLIC4/APOE/RIN3/DPYSL3/LRP1/PFN2/EMILIN1/CLASP2/SLC9A3R1/JAG1/ACVRL1/GADD45A/DUSP1/PTGER4/CD74/HMOX1/ADARB1/JUP/STK26/ABHD2/RAP2A/TGFB1/AIF1/MEF2C/CNN2/RRAS/COL3A1/RGCC/CCL2	39
high	GO:0048771	tissue remodeling	23/1012	184/21069	2.62588e-05	0.00107214	0.000851953	TCIRG1/CST3/GPR137B/GJA1/EPAS1/ACP5/S1PR1/MITF/NOTCH2/FLNA/CSF1R/JAG1/ACVRL1/PDK4/MMP14/PPP3CA/NCDN/F2R/TGFB1/MEF2C/HIF1A/CTSK/CSK	23
high	GO:0006575	cellular modified amino acid metabolic process	24/1012	197/21069	2.71423e-05	0.00109203	0.000867763	CTNS/SERINC5/GSTZ1/GAMT/ETHE1/GATM/GSR/PLOD2/MTHFD1/TMLHE/GCLC/MBOAT1/SLC27A1/POR/OPLAH/AHCY/IDH1/CTSK/CROT/ACADM/ALDH4A1/CKB/GCH1/GGACT	24
high	GO:0002064	epithelial cell development	27/1012	236/21069	2.74527e-05	0.00109652	0.000871324	SPINT2/MYD88/CXCR4/MSN/EPAS1/EDNRB/HSD17B4/NOTCH2/RILPL1/TMEM79/CLIC4/PECAM1/JAG1/CLDN1/ACTA2/TMOD1/B4GALT1/FASN/VIM/HIF1A/HEG1/PDGFB/COL18A1/FOSL2/NOTCH4/DLL1/FRMD6	27
high	GO:0042692	muscle cell differentiation	41/1012	434/21069	3.04115e-05	0.00120596	0.00095829	NFATC1/FHL2/ATP2A2/PI16/FZD7/HOPX/BCL9/KIT/EDNRB/CD53/PDGFRA/PTGFRN/PPARA/RBM38/QKI/LAMC1/PDLIM5/NIBAN2/SGCB/TMOD1/CD9/MMP14/CFL2/MYH11/PPP3CA/LMNA/PLD3/BIN1/PPP3CB/RAMP2/SIRT6/TGFB1/MEF2C/PIEZO1/ADM/PDGFB/ACADM/HOMER1/DLL1/ARRB2/OBSL1	41
high	GO:0060249	anatomical structure homeostasis	36/1012	362/21069	3.13731e-05	0.0012352	0.000981529	CSF1/TCIRG1/SLC22A5/GPR137B/ATP2A2/GJA1/EPAS1/ACP5/TP53INP2/S1PR1/TLR4/VSTM4/ALDH1A1/CORO1A/SLC2A1/CTSH/LAMC1/PECAM1/CSF1R/ALDOA/CLDN1/PDK4/CFL2/NCDN/HOMER2/CA2/AKT3/JCHAIN/F2R/HIF1A/CTSK/CSK/COL3A1/RCN3/MBP/HOMER1	36
high	GO:0007162	negative regulation of cell adhesion	37/1012	378/21069	3.44899e-05	0.00134828	0.00107139	SPINT2/LRRC32/THBS1/FZD7/LGALS3/CXCL12/LAPTM5/PPARA/SERPINE2/TGFBI/FGL2/VSIR/CLASP2/JAG1/COL1A1/ACVRL1/DUSP1/SIPA1/CD9/MMP14/SDC4/CD74/ANXA1/TNFRSF21/PTPN6/TNFAIP8L2/TGFB1/SPI1/ERBB2/MBP/NOTCH4/IRF1/FXYD5/RGCC/FZD4/NDFIP1/CEBPB	37
high	GO:0050678	regulation of epithelial cell proliferation	41/1012	438/21069	3.75207e-05	0.00144625	0.00114924	NR4A1/JCAD/THBS1/FZD7/TRIM24/STK4/ECM1/MTA3/CXCL12/EDNRB/KDM5B/LIMS2/ERRFI1/F3/NOTCH2/MAGED1/APOE/LAMC1/NRP2/JAG1/CLDN1/ACVRL1/SPARC/B4GALT1/HMOX1/DAB2/CCND1/AKT3/GRN/NRP1/SIRT6/TGFB1/MEF2C/HIF1A/PDGFB/ERBB2/TGFBR3/CDKN1C/RGCC/CCL2/CYBA	41
high	GO:0048545	response to steroid hormone	37/1012	380/21069	3.86186e-05	0.00147824	0.00117465	ALAD/AQP1/ATP1A1/THBS1/FOS/RNF6/AGL/ERRFI1/AIFM1/PIAS2/PPARA/ANXA3/PAK1/NR1H3/PCK2/GOT1/COL1A1/CLDN1/SRD5A1/ANXA1/DAB2/FBXO32/POR/CCND1/LCAT/CYBB/ABHD2/TGFB1/IDH1/AIF1/ADM/UBR5/IGF1R/MBP/LBH/YWHAH/CYBA	37
high	GO:0032352	positive regulation of hormone metabolic process	6/1012	15/21069	4.16562e-05	0.00155141	0.0012328	EGR1/DAB2/POR/HIF1A/ADM/IGF1R	6
high	GO:0071474	cellular hyperosmotic response	6/1012	15/21069	4.16562e-05	0.00155141	0.0012328	AQP1/SLC25A23/ERRFI1/SLC2A1/YBX3/RCSD1	6
high	GO:0031589	cell-substrate adhesion	39/1012	411/21069	4.2751e-05	0.0015815	0.00125671	CSF1/SMAD6/THBS1/FZD7/SORBS1/STK4/PLEKHA2/PEAK1/PLAU/LIMS2/EMP2/FN1/CORO1A/SPOCK2/CCDC80/RAC2/FLNA/EMILIN1/CLASP2/CD44/LAMC1/VWF/JAG1/COL1A1/MEGF9/ACVRL1/MMP14/SDC4/DAB2/RELL2/JUP/NRP1/ITGAV/PRKCE/RRAS/COL3A1/PDGFB/NID2/FZD4	39
high	GO:0060326	cell chemotaxis	36/1012	369/21069	4.69264e-05	0.00171297	0.00136118	CSF1/RHOG/NR4A1/CXCR4/THBS1/LGALS3/KIT/CORO1B/CXCL12/EDNRB/S1PR1/PDGFRA/CORO1A/PDE4B/RIN3/RAC2/CSF1R/DUSP1/CD74/ANXA1/BSG/LYST/ACKR3/IL6R/NRP1/LYN/AIF1/DOCK4/PDGFB/SPI1/FCER1G/CXCL16/ARRB2/CCL2/MTUS1/LGMN	36
high	GO:0006979	response to oxidative stress	44/1012	488/21069	4.85298e-05	0.00171472	0.00136257	ALAD/CRYAB/AQP1/ATP2A2/STAU2/NDUFS2/UCP2/EPAS1/FOS/DHCR24/CYGB/PINK1/TLR4/AIFM1/GSR/PDGFRA/ATP13A2/MGST1/APOE/CAMKK2/SRXN1/COL1A1/MMP14/ETV5/LANCL1/GCLC/HMOX1/ANXA1/PPIF/RIPK3/STK26/CPEB2/IDH1/AIF1/NQO1/HIF1A/CAT/SETX/RBPMS/GCH1/GPX3/MSRB3/KLF2/SELENOP	44
high	GO:0072593	reactive oxygen species metabolic process	28/1012	259/21069	5.46921e-05	0.00186088	0.00147871	CRYAB/CTNS/THBS1/SLC18A2/ACP5/PINK1/TLR4/IFI6/PPARA/STK17A/CDKN1A/SH3PXD2B/RAC2/NNT/GADD45A/PDK4/RIPK3/CYBB/TGFB1/NQO1/HIF1A/CAT/PDGFB/NDUFS1/ACOX1/GCH1/GPX3/CYBA	28
high	GO:0046034	ATP metabolic process	27/1012	247/21069	6.09991e-05	0.00203774	0.00161925	DHTKD1/CTNS/PKM/PFKFB2/NDUFS2/ATP1B1/ATP5MC3/SLC25A13/NDUFA8/NDUFA9/ENO3/OGDH/PINK1/PPARA/SDHB/NDUFB10/ALDOA/GPD1/PGM1/NDUFS7/TPI1/SIRT6/TGFB1/HIF1A/NDUFV1/NDUFS1/SDHA	27
high	GO:0001101	response to acid chemical	19/1012	144/21069	6.1606e-05	0.0020394	0.00162057	ALAD/MYD88/AIFM1/PDGFRA/COL1A1/COL1A2/SH3BP4/SIPA1/GCLC/CASTOR1/CYBB/LYN/NQO1/COL3A1/IGF1R/LRP11/CYBA/CEBPB/KLF2	19
high	GO:1904062	regulation of cation transmembrane transport	39/1012	418/21069	6.17887e-05	0.0020394	0.00162057	TCIRG1/EHD3/ATP1B1/SLC31A2/PINK1/GEM/HSPA2/CORO1A/PDE4B/PM20D1/SRI/FLNA/SLC9A3R1/SLC43A2/AHNAK/ATP1B3/FXYD6/HCN2/PPP3CA/PPIF/CTSS/BIN1/PPP3CB/LYN/F2R/PTPN6/UBR3/PRKCE/MEF2C/RAMP3/SLMAP/HOMER1/SHANK3/YWHAH/FXYD5/TMEM38B/CCL2/CYBA/VAMP2	39
high	GO:0010889	regulation of sequestering of triglyceride	6/1012	16/21069	6.39429e-05	0.00207482	0.00164871	PNPLA2/PLIN2/PPARA/LPL/FITM2/FITM1	6
high	GO:0030033	microvillus assembly	6/1012	16/21069	6.39429e-05	0.00207482	0.00164871	RAPGEF6/FSCN1/SLC9A3R1/STK26/RAP2A/FXYD5	6
high	GO:0001894	tissue homeostasis	31/1012	303/21069	6.41774e-05	0.00207482	0.00164871	CSF1/TCIRG1/SLC22A5/GPR137B/GJA1/EPAS1/ACP5/TP53INP2/S1PR1/TLR4/VSTM4/ALDH1A1/CORO1A/SLC2A1/CTSH/LAMC1/PECAM1/CSF1R/CLDN1/PDK4/NCDN/HOMER2/AKT3/JCHAIN/F2R/CTSK/CSK/COL3A1/RCN3/MBP/HOMER1	31
high	GO:1901653	cellular response to peptide	38/1012	404/21069	6.43675e-05	0.00207482	0.00164871	NR4A1/INSIG1/PKM/GJA1/FBN1/SORBS1/UCP2/ZNF106/FOS/TBC1D4/TLR4/ERRFI1/RAP1GDS1/LPIN1/LRP1/PCK2/GOT1/LPL/RHOQ/PDK4/SRD5A1/GCLC/SLC27A1/POR/CA2/PIP4K2A/VIM/SLC39A14/CPEB2/LYN/SIK2/CSK/IGF1R/GKAP1/LGMN/CYBA/KLF2/VAMP2	38
high	GO:0051402	neuron apoptotic process	29/1012	276/21069	6.79904e-05	0.00217884	0.00173137	POLB/PINK1/CASP7/AIFM1/EGLN3/CORO1A/BOK/APOE/FAM162A/LANCL1/GCLC/HMOX1/RETREG1/ADARB1/CCND1/GRN/NRP1/TNFRSF21/F2R/NQO1/MEF2C/HIF1A/GPRASP2/ARRB2/CCL2/CLCF1/WFS1/LGMN/CEBPB	29
high	GO:0071559	response to transforming growth factor beta	30/1012	290/21069	6.83853e-05	0.00217884	0.00173137	SMAD6/NFATC1/LRRC32/THBS1/FBN1/TGFB1I1/FOS/LTBP4/SAP130/PPARA/EMILIN1/COL1A1/CLDN1/COL1A2/ACVRL1/FMOD/EID2/DAB2/FNDC4/ZNF451/TGFB1/MEF2C/CTSK/COL3A1/IGF1R/SPI1/TGFBR3/CDKN1C/ARRB2/VASN	30
high	GO:0002335	mature B cell differentiation	9/1012	39/21069	7.55407e-05	0.0023658	0.00187993	CMTM7/IL2RG/NOTCH2/BCL3/PLCL2/MFNG/LGALS1/SPI1/DLL1	9
high	GO:0042398	cellular modified amino acid biosynthetic process	10/1012	48/21069	7.72384e-05	0.00238234	0.00189308	GAMT/GATM/PLOD2/MTHFD1/TMLHE/GCLC/SLC27A1/ACADM/CKB/GCH1	10
high	GO:0052548	regulation of endopeptidase activity	44/1012	498/21069	7.78394e-05	0.00238361	0.00189409	SPINT2/CRYAB/NR4A1/CST3/AQP1/CAST/SERPINH1/SERPINB8/THBS1/PSMB8/DHCR24/LAPTM5/AIFM1/F3/IFI6/EGLN3/ATP13A2/BOK/SERPINE2/SPOCK2/CRIM1/CDKN2D/VSIR/TIMP2/CTSH/FAM162A/CD44/RPS6KA1/TNFAIP8/RARRES1/ATP2A3/CASP8/SERPING1/POR/TNFSF10/BIN1/GSN/LYN/F2R/MBP/BIRC3/ARRB2/CST6/LGMN	44
high	GO:0097205	renal filtration	8/1012	31/21069	8.09018e-05	0.00246371	0.00195773	AQP1/EMP2/SULF2/PPP3CA/JCHAIN/F2R/PDGFB/CYBA	8
high	GO:1901214	regulation of neuron death	38/1012	409/21069	8.34704e-05	0.00252796	0.00200879	CSF1/RAB29/FOS/DHCR24/PINK1/TLR4/AIFM1/C1QA/RILPL1/PPARA/EGLN3/ATP13A2/CORO1A/BOK/PM20D1/EGR1/APOE/LANCL1/GCLC/HMOX1/CASP8/RETREG1/CCND1/CTSZ/GRN/NRP1/F2R/NQO1/MEF2C/HIF1A/TNFRSF1B/GPRASP2/ARRB2/CCL2/CLCF1/WFS1/LGMN/CEBPB	38
high	GO:0010466	negative regulation of peptidase activity	30/1012	296/21069	9.92068e-05	0.00293994	0.00233616	SPINT2/CRYAB/NR4A1/CST3/AQP1/CAST/SERPINH1/SERPINB8/THBS1/PI16/ECM1/DHCR24/IFI6/SERPINE2/SPOCK2/CRIM1/CDKN2D/LRP1/TIMP2/CD44/RPS6KA1/TNFAIP8/RARRES1/SERPING1/POR/BIN1/BIRC3/SIMC1/ARRB2/CST6	30
high	GO:0007596	blood coagulation	27/1012	256/21069	0.000112129	0.00322625	0.00256367	VKORC1/F2RL2/THBS1/ENPP4/PLAU/TLR4/F3/PDGFRA/PROCR/FN1/SERPINE2/APOE/FLNA/EMILIN1/VWF/CD9/SERPING1/ST3GAL4/LYN/F2R/PTPN6/DGKD/COL3A1/PDGFB/ANXA5/FCER1G/THBD	27
high	GO:0071560	cellular response to transforming growth factor beta stimulus	29/1012	284/21069	0.000112871	0.00322625	0.00256367	SMAD6/NFATC1/LRRC32/THBS1/FBN1/TGFB1I1/FOS/LTBP4/SAP130/PPARA/EMILIN1/COL1A1/CLDN1/COL1A2/ACVRL1/FMOD/EID2/DAB2/ZNF451/TGFB1/MEF2C/CTSK/COL3A1/IGF1R/SPI1/TGFBR3/CDKN1C/ARRB2/VASN	29
high	GO:0002274	myeloid leukocyte activation	29/1012	285/21069	0.000120036	0.0033294	0.00264564	CSF1/MYD88/NDRG1/GPR137B/THBS1/KIT/TLR4/C1QA/NOTCH2/FN1/ANXA3/NR1H3/RAC2/CTSC/CD74/HMOX1/MFHAS1/ANXA1/MYO18A/GRN/LYN/DNASE1/PTPN6/AIF1/PRKCE/SPI1/FCER1G/RELB/VAMP2	29
high	GO:0050866	negative regulation of cell activation	29/1012	285/21069	0.000120036	0.0033294	0.00264564	LRRC32/LGALS3/LAPTM5/CYGB/PDGFRA/SERPINE2/FGL2/APOE/NR1H3/VSIR/EMILIN1/CD9/SDC4/CD74/GCLC/HMOX1/ANXA1/GRN/LYN/TNFRSF21/PTPN6/TNFAIP8L2/PDGFB/SPI1/ERBB2/IRF1/NDFIP1/THBD/CEBPB	29
high	GO:0006081	cellular aldehyde metabolic process	13/1012	81/21069	0.000120806	0.0033294	0.00264564	AKR1A1/TKT/EDNRB/ALDH1A1/IDH2/ADH5/DAB2/TKFC/GRHPR/TPI1/IDH1/GLYCTK/PDXP	13
high	GO:0032528	microvillus organization	7/1012	25/21069	0.000129599	0.00351896	0.00279627	RAPGEF6/FSCN1/SLC9A3R1/STK26/RAP2A/FXYD5/TWF2	7
high	GO:0071900	regulation of protein serine/threonine kinase activity	39/1012	433/21069	0.000130755	0.00353264	0.00280715	MAP4K2/MAP2K6/THBS1/KIT/DVL2/STK4/ACSL1/PKIG/TLR4/CDKN1A/MAGED1/MAPRE3/APOE/PAK1/CDKN2D/CSF1R/GADD45A/DUSP1/HHEX/PRKAR2B/TRIB2/DAB2/SLC27A1/CCND1/MAP3K10/STRADB/LYN/PTPN6/TGFB1/MEF2C/HEG1/CSK/PDGFB/ERBB2/CDKN1C/CAB39L/RGCC/FZD4/PRKAR1B	39
high	GO:0010632	regulation of epithelial cell migration	31/1012	315/21069	0.000131385	0.00353264	0.00280715	JCAD/THBS1/ETS1/DCN/EMP2/MAPRE2/ARSB/APOE/ANXA3/CTSH/PFN2/CLASP2/NRP2/ACVRL1/GADD45A/SCARB1/SPARC/HMOX1/ANXA1/JUP/AKT3/GRN/NRP1/TGFB1/PRKCE/MEF2C/HIF1A/RRAS/PDGFB/RGCC/LGMN	31
high	GO:0090594	inflammatory response to wounding	6/1012	18/21069	0.000136451	0.00359865	0.00285959	TLR4/HMOX1/GRN/F2R/TGFB1/HIF1A	6
high	GO:0051346	negative regulation of hydrolase activity	38/1012	419/21069	0.000137806	0.00361708	0.00287424	SPINT2/CRYAB/NR4A1/CST3/AQP1/CAST/SERPINH1/SERPINB8/THBS1/PI16/LGALS3/ECM1/DHCR24/RAP1GDS1/IFI6/LPIN1/SERPINE2/SPOCK2/CRIM1/CDKN2D/LRP1/TIMP2/CD44/SH3BP4/RPS6KA1/TNFAIP8/RARRES1/ANXA1/SERPING1/POR/GPSM1/BIN1/SLC39A14/CPEB2/BIRC3/SIMC1/ARRB2/CST6	38
high	GO:0036294	cellular response to decreased oxygen levels	20/1012	166/21069	0.000143863	0.00374043	0.00297226	NDRG1/AQP1/ACAA2/EPAS1/FOS/PINK1/AIFM1/EGLN3/EGR1/SUV39H2/FAM162A/SLC29A1/HMOX1/LMNA/CPEB2/CYBB/PRKCE/HIF1A/RGCC/VASN	20
high	GO:0002062	chondrocyte differentiation	16/1012	117/21069	0.000150067	0.00388341	0.00308588	SERPINH1/TSKU/ECM1/RFLNB/CHSY1/SULF2/TGFBI/ACVRL1/ARID5A/POR/SLC39A14/TGFB1/MEF2C/HIF1A/COL3A1/MAF	16
high	GO:0050817	coagulation	27/1012	261/21069	0.000154745	0.00396724	0.00315249	VKORC1/F2RL2/THBS1/ENPP4/PLAU/TLR4/F3/PDGFRA/PROCR/FN1/SERPINE2/APOE/FLNA/EMILIN1/VWF/CD9/SERPING1/ST3GAL4/LYN/F2R/PTPN6/DGKD/COL3A1/PDGFB/ANXA5/FCER1G/THBD	27
high	GO:0043524	negative regulation of neuron apoptotic process	20/1012	167/21069	0.000156211	0.00396869	0.00315364	PINK1/CORO1A/BOK/APOE/GCLC/HMOX1/RETREG1/CCND1/GRN/NRP1/F2R/MEF2C/HIF1A/GPRASP2/ARRB2/CCL2/CLCF1/WFS1/LGMN/CEBPB	20
high	GO:0046463	acylglycerol biosynthetic process	10/1012	52/21069	0.000156962	0.00396869	0.00315364	ACSL1/PNPLA2/LPIN1/NR1H3/GPAM/PCK2/LPL/SCARB1/SLC27A1/FITM2	10
high	GO:0010975	regulation of neuron projection development	41/1012	468/21069	0.000161753	0.00407115	0.00323506	PRAG1/TSKU/STAU2/RAB29/CXCL12/RNF6/FN1/ARSB/KREMEN1/APOE/PAK1/DPYSL3/FLNA/PDLIM5/PPP3CA/DAB2/MBOAT1/RYK/CCDC88A/PTPRS/SEMA3F/VIM/GRN/PMP22/CAPRIN2/NRP1/LYN/NIN/RAP2A/IGF1R/INPP5F/NCKIPSD/MBP/SETX/ENC1/SHANK3/YWHAH/GPRASP2/OBSL1/LIMK1/TWF2	41
high	GO:1990748	cellular detoxification	17/1012	130/21069	0.000164778	0.00410974	0.00326573	AKR1A1/GSTZ1/CYGB/GSR/ALDH1A1/MGST1/APOE/MGST3/SRXN1/ADH5/MTARC2/NQO1/CAT/PRXL2A/GCH1/GPX3/TXNDC17	17
high	GO:0051235	maintenance of location	34/1012	363/21069	0.000165946	0.00412024	0.00327406	INSIG1/FBN1/BSCL2/SLC25A23/SLC18A2/PNPLA2/PLIN2/PINK1/PPARA/CORO1A/KDELR3/APOE/SRI/NR1H3/FLNA/LPL/SCARB1/ANXA1/CCDC88A/SRGN/LDAF1/GSN/ITGAV/FITM2/LYN/F2R/PTPN6/PRKCE/FITM1/GM2A/CHCHD10/TMEM38B/CYBA/TWF2	34
high	GO:0016052	carbohydrate catabolic process	20/1012	169/21069	0.000183739	0.00446154	0.00354528	DHTKD1/PKM/PFKFB2/PYGB/ENO3/OGDH/AGL/PPARA/PPP1R3B/ALDOA/GPD1/TKFC/PGM1/TPI1/SIRT6/HIF1A/GALM/GLYCTK/GM2A/SORD	20
high	GO:0046777	protein autophosphorylation	26/1012	250/21069	0.000186711	0.00451383	0.00358682	TRIM24/KIT/STK4/PIM2/CHEK2/PEAK1/PINK1/ERRFI1/TOM1L1/PDGFRA/ATP13A2/PAK1/CAMKK2/CSF1R/STK17B/STK10/MAP3K10/RIPK3/STK26/LYN/SIK2/RAP2A/CSK/IGF1R/PDGFB/ERBB2	26
high	GO:0030206	chondroitin sulfate biosynthetic process	6/1012	19/21069	0.000191351	0.00458577	0.00364399	CSGALNACT1/DSE/CHSY1/CHST7/UGDH/CHPF	6
high	GO:0030279	negative regulation of ossification	9/1012	44/21069	0.00020367	0.00473684	0.00376403	SMAD6/ECM1/RFLNB/CHSY1/KREMEN1/TMEM53/SRGN/MEF2C/HIF1A	9
high	GO:0010038	response to metal ion	35/1012	383/21069	0.000215453	0.00490735	0.00389953	ALAD/TCIRG1/NDRG1/AQP1/THBS1/KIT/SLC25A23/SLC25A13/FOS/SLC41A1/ADCY7/CYBRD1/ATP13A2/CLIC4/SLC40A1/KHK/CLDN1/CD14/GCLC/HMOX1/CASP8/PPP3CA/BSG/PPIF/CCND1/LCAT/CYBB/NQO1/MEF2C/HIF1A/CAT/MBP/SORD/HOMER1/LGMN	35
high	GO:0001935	endothelial cell proliferation	23/1012	211/21069	0.000216974	0.00492165	0.00391089	NR4A1/JCAD/THBS1/ECM1/CXCL12/VSTM4/F3/APOE/NRP2/ACVRL1/SCARB1/MMP14/SPARC/HMOX1/AKT3/NRP1/SIRT6/MEF2C/HIF1A/PDGFB/RGCC/CCL2/CYBA	23
high	GO:0070661	leukocyte proliferation	39/1012	446/21069	0.00024026	0.00540536	0.00429526	CSF1/TCIRG1/MYD88/LRRC32/CTPS1/LGALS3/KIT/MSN/TLR4/EMP2/CDKN1A/CORO1A/PLCL2/VSIR/RAC2/GPAM/HLA-DMB/CSF1R/HHEX/SDC4/CD74/ANXA1/PPP3CA/RIPK3/ELF4/PPP3CB/CD276/LYN/TNFRSF21/PTPN6/AIF1/MEF2C/CNN2/ERBB2/TNFRSF1B/IRF1/CLCF1/NDFIP1/CEBPB	39
high	GO:0031345	negative regulation of cell projection organization	22/1012	201/21069	0.000278117	0.0062064	0.00493179	PRAG1/TSKU/RAB29/CCP110/RNF6/KREMEN1/APOE/DPYSL3/LIMK2/PFN2/FLNA/PPP3CA/DAB2/RYK/PTPRS/SEMA3F/VIM/PMP22/NRP1/INPP5F/MBP/YWHAH	22
high	GO:1902903	regulation of supramolecular fiber organization	38/1012	434/21069	0.00027982	0.00621923	0.00494199	CRYAB/HCLS1/PDE4DIP/CORO1B/CXCL12/S1PR1/CORO1A/MAPRE3/APOE/PAK1/SSH2/PFN2/ALMS1/FLNA/EMILIN1/CLASP2/AEBP1/SYNPO/MAP6D1/TMOD1/PTGER4/CFL2/SDC4/COTL1/CCDC88A/BIN1/VASP/CLIP3/NRP1/GSN/PRKCE/CYRIB/SVIL/SHANK3/PDXP/RGCC/LIMK1/TWF2	38
high	GO:0006972	hyperosmotic response	7/1012	28/21069	0.000281373	0.00621979	0.00494243	AQP1/SLC25A23/ERRFI1/SLC2A1/YBX3/CLDN1/RCSD1	7
high	GO:0043112	receptor metabolic process	11/1012	66/21069	0.000282102	0.00621979	0.00494243	EHD3/RAB29/LAPTM5/NSF/PHETA2/DTX3L/APOE/TGFB1/RAMP3/INPP5F/LGMN	11
high	GO:0003158	endothelium development	19/1012	163/21069	0.000320217	0.00697642	0.00554368	MYD88/CXCR4/APOLD1/MSN/EDNRB/S1PR1/CLIC4/SLC40A1/PECAM1/JAG1/CLDN1/ACVRL1/FASN/NRP1/HEG1/FSTL1/COL18A1/NOTCH4/DLL1	19
high	GO:0072537	fibroblast activation	5/1012	14/21069	0.000352298	0.00753965	0.00599123	CYGB/RPS6KA1/ACTA2/GCLC/RGCC	5
high	GO:0009081	branched-chain amino acid metabolic process	7/1012	29/21069	0.000355644	0.00753965	0.00599123	DLD/ACAT1/ECHS1/HSD17B10/ACADSB/ALDH6A1/HMGCL	7
high	GO:0018149	peptide cross-linking	8/1012	38/21069	0.000372078	0.00779809	0.00619659	THBS1/DCN/BGN/FN1/SPOCK2/ANXA1/TGM2/COL3A1	8
high	GO:0050920	regulation of chemotaxis	26/1012	263/21069	0.000413301	0.00862923	0.00685704	CSF1/CXCR4/THBS1/CORO1B/CXCL12/S1PR1/F3/PDGFRA/RIN3/RAC2/CSF1R/DUSP1/CD74/RYK/SEMA3F/IL6R/NRP1/LYN/TGFB1/AIF1/CYRIB/PDGFB/SPI1/CCL2/MTUS1/LGMN	26
high	GO:0008217	regulation of blood pressure	22/1012	207/21069	0.000419581	0.00872728	0.00693496	ATP1A1/EDNRB/EMP2/SCPEP1/POMC/PPARA/EMILIN1/COL1A2/ACVRL1/ACTA2/HMOX1/ADH5/CTSZ/RAMP2/F2R/ADM/PDGFB/NCALD/DLL1/ERAP2/GCH1/CYBA	22
high	GO:0072337	modified amino acid transport	8/1012	39/21069	0.000448604	0.00926108	0.00735913	SLC22A5/CTNS/GJA1/SLC25A13/SLC5A6/MGST1/SLC9A3R1/SLC3A1	8
high	GO:0042063	gliogenesis	32/1012	353/21069	0.000453457	0.00929164	0.00738342	CSF1/NDRG1/CXCR4/NDUFS2/APCDD1/TLR4/C1QA/HDAC11/BOK/SERPINE2/LRP1/CSF1R/CD9/MMP14/ANXA1/VIM/GRN/BIN1/LYN/TNFRSF21/TGFB1/RRAS/CSK/COL3A1/ERBB2/TNFRSF1B/CNP/DLL1/CCL2/PHGDH/CLCF1/SOX4	32
high	GO:0043200	response to amino acid	16/1012	129/21069	0.000464552	0.00944874	0.00750825	ALAD/MYD88/AIFM1/PDGFRA/COL1A1/COL1A2/SH3BP4/GCLC/CASTOR1/CYBB/LYN/NQO1/COL3A1/IGF1R/CYBA/CEBPB	16
high	GO:0071887	leukocyte apoptotic process	16/1012	129/21069	0.000464552	0.00944874	0.00750825	HCLS1/LGALS3/CHEK2/CXCL12/PLEKHO2/BCL3/GPAM/ORMDL3/CD74/ANXA1/KIFAP3/RIPK3/LYN/TNFRSF21/MEF2C/HIF1A	16
high	GO:0001570	vasculogenesis	12/1012	81/21069	0.000467952	0.00948292	0.00753541	EMP2/QKI/ACKR3/NRP1/RAMP2/ITGAV/TGFB1/RRAS/ADM/HEG1/TGFBR3/FZD4	12
high	GO:1903829	positive regulation of protein localization	41/1012	495/21069	0.000514968	0.0102104	0.00811352	RHOG/GPR137B/HCLS1/PFKFB2/LGALS3/SORBS1/NNAT/RAB29/MSN/EPB41L2/PINK1/TLR4/PCM1/ATP13A2/GLIS2/DTX3L/SRI/LIMK2/LRP1/RAC2/FLNA/PCK2/PECAM1/CD247/ORMDL3/MIEF2/MYO18A/CCDC88A/JUP/PPP3CB/CLIP3/SIRT6/TGFB1/PRKCE/RAMP3/HIF1A/UBR5/ERBB2/OXCT1/SOX4/VAMP2	41
high	GO:0010959	regulation of metal ion transport	39/1012	464/21069	0.000526056	0.0103929	0.00825852	CXCR4/ATP1A1/EHD3/LGALS3/ATP1B1/CXCL12/SLC31A2/GEM/HSPA2/CORO1A/PDE4B/SERPINE2/SRI/FLNA/SLC9A3R1/AHNAK/ATP1B3/FXYD6/PPP3CA/HOMER2/BIN1/PPP3CB/LYN/F2R/PTPN6/UBR3/PRKCE/RAMP3/SLMAP/PDGFB/HOMER1/YWHAH/FXYD5/TMEM38B/ARRB2/CCL2/WFS1/CYBA/VAMP2	39
high	GO:0043620	regulation of DNA-templated transcription in response to stress	9/1012	50/21069	0.000556049	0.0108686	0.0086365	EPAS1/CREB3L1/ATF3/EGR1/RPS6KA1/HMOX1/HIF1A/CEBPB/KLF2	9
high	GO:0006024	glycosaminoglycan biosynthetic process	12/1012	83/21069	0.000586965	0.0113124	0.00898919	B4GALT4/CSGALNACT1/DSE/CHSY1/CHST7/CHST2/UGDH/ST3GAL4/TGFB1/CHPF/PDGFB/B4GAT1	12
high	GO:0010822	positive regulation of mitochondrion organization	12/1012	83/21069	0.000586965	0.0113124	0.00898919	DCN/PINK1/BOK/CAMKK2/FAM162A/MLLT11/PPIF/MIEF2/TNFSF10/HIF1A/CHCHD10/SLC25A5	12
high	GO:0031638	zymogen activation	11/1012	72/21069	0.000610832	0.01161	0.00922566	THBS1/DHCR24/PLAU/SERPINE2/VSIR/CTSH/MMP14/CASP8/CTSZ/LGMN/THBD	11
high	GO:0055007	cardiac muscle cell differentiation	16/1012	133/21069	0.000653002	0.0122845	0.0097616	FHL2/PI16/FZD7/PDGFRA/PPARA/PDLIM5/SGCB/MYH11/LMNA/SIRT6/TGFB1/MEF2C/ACADM/DLL1/ARRB2/OBSL1	16
high	GO:0070371	ERK1 and ERK2 cascade	34/1012	393/21069	0.000707131	0.0130756	0.0103903	NDRG2/TLR4/ERRFI1/PDGFRA/NOTCH2/FN1/ATF3/APOE/CTSH/EMILIN1/SLC9A3R1/CD44/CSF1R/ACTA2/PTGER4/CD74/MFHAS1/DAB2/ACKR3/CAVIN3/NRP1/ITGAV/LYN/F2R/PTPN6/TGFB1/ARRB1/RAMP3/RRAS/CSK/PDGFB/ERBB2/ARRB2/CCL2	34
high	GO:0021783	preganglionic parasympathetic fiber development	5/1012	16/21069	0.00070929	0.0130756	0.0103903	NRP2/ADARB1/SEMA3F/ACKR3/NRP1	5
high	GO:0032535	regulation of cellular component size	34/1012	394/21069	0.000739267	0.0135828	0.0107933	AQP1/HCLS1/MSN/CXCL12/RNF6/FN1/ATP13A2/CORO1A/APOE/RIN3/SSH2/PFN2/SLC9A3R1/TMOD1/CFL2/SLC12A6/COTL1/RYK/AKT3/PTPRS/SEMA3F/DPYSL2/BIN1/VASP/NRP1/GSN/PRKCE/CYRIB/SVIL/SHANK3/PDXP/LIMK1/TMEM123/TWF2	34
high	GO:0043393	regulation of protein binding	22/1012	216/21069	0.000748702	0.0136319	0.0108323	ATP2A2/STING1/HOPX/STK4/IFIT1/PPARA/CDKN1A/MAPRE3/SPON1/DTX3L/PLCL2/APOE/LRP1/ATP2A3/MFNG/DAB2/CTSZ/CAPRIN2/NRP1/PDGFB/TGFBR3/ARRB2	22
high	GO:0010762	regulation of fibroblast migration	8/1012	42/21069	0.000757646	0.0137373	0.0109161	AQP1/THBS1/CYGB/SLC9A3R1/ACTA2/SDC4/TGFB1/PRKCE	8
high	GO:0045926	negative regulation of growth	26/1012	274/21069	0.000766671	0.0138554	0.0110099	CRYAB/GJA1/PI16/STK4/RNF6/PPARA/CDKN1A/SERPINE2/CDKN2D/WWC2/WWC3/ACVRL1/SH3BP4/SIPA1/DCBLD2/DAB2/RYK/TSPYL2/PTPRS/SEMA3F/CRLF3/CAPRIN2/NRP1/TGFB1/HIF1A/LGMN	26
high	GO:0031100	animal organ regeneration	11/1012	74/21069	0.000774252	0.0139012	0.0110463	UCP2/CXCL12/LCP1/LPIN1/ANXA3/CLDN1/HMOX1/CCND1/ADM/TGFBR3/CEBPB	11
high	GO:0007568	aging	19/1012	175/21069	0.000777818	0.0139199	0.0110612	CD68/POLB/CRYAB/UCP2/FOS/EDNRB/C1QA/CTSC/CLDN1/GCLC/PPP3CA/SERPING1/NQO1/CAT/ADM/IGF1R/MBP/TNFRSF1B/CNP	19
high	GO:0070663	regulation of leukocyte proliferation	32/1012	365/21069	0.000801674	0.0142543	0.0113269	CSF1/MYD88/LRRC32/LGALS3/KIT/TLR4/CDKN1A/CORO1A/VSIR/RAC2/GPAM/HLA-DMB/CSF1R/HHEX/SDC4/CD74/ANXA1/PPP3CA/RIPK3/CD276/LYN/TNFRSF21/PTPN6/AIF1/MEF2C/CNN2/ERBB2/TNFRSF1B/IRF1/CLCF1/NDFIP1/CEBPB	32
high	GO:0034504	protein localization to nucleus	30/1012	335/21069	0.000820078	0.0145346	0.0115496	HCLS1/IPO4/LMNB1/STK4/KPNA3/NXT1/PKIG/RAP1GDS1/ATP13A2/CDKN1A/MAGED1/GLIS2/BCL3/DTX3L/LIMK2/FLNA/KPNA2/COL1A1/ORMDL3/HHEX/MFHAS1/PPP3CA/LMNA/JUP/IPO13/SIRT6/TGFB1/UBR5/SNUPN/CHCHD10	30
high	GO:0003093	regulation of glomerular filtration	4/1012	10/21069	0.000880287	0.0149422	0.0118735	EMP2/F2R/PDGFB/CYBA	4
high	GO:0015911	long-chain fatty acid import across plasma membrane	4/1012	10/21069	0.000880287	0.0149422	0.0118735	THBS1/ACSL1/SLC2A1/SLC27A1	4
high	GO:1901203	positive regulation of extracellular matrix assembly	4/1012	10/21069	0.000880287	0.0149422	0.0118735	EMILIN1/CLASP2/TGFB1/RGCC	4
high	GO:0032496	response to lipopolysaccharide	34/1012	398/21069	0.000881028	0.0149422	0.0118735	CD68/ALAD/CSF1/NR4A1/MYD88/SMAD6/FOS/ACP5/EDNRB/TLR4/PDE4B/NR1H3/PCK2/CLDN1/ARID5A/SCARB1/PTGER4/CD14/CASP8/ADH5/VIM/LYN/F2R/TGFB1/PRKCE/MEF2C/ADM/SPI1/TNFRSF1B/CNP/CCL2/GCH1/THBD/CEBPB	34
high	GO:2001234	negative regulation of apoptotic signaling pathway	25/1012	262/21069	0.000885412	0.0149705	0.011896	THBS1/LGALS3/ACAA2/CXCL12/PEA15/PINK1/CREB3L1/IFI6/BOK/YBX3/CDKN2D/CD44/CD74/GCLC/HMOX1/PPIF/LMNA/ACKR3/STRADB/NRP1/ITGAV/HIF1A/ARRB2/SLC25A5/WFS1	25
high	GO:0006739	NADP metabolic process	8/1012	43/21069	0.000892161	0.0149927	0.0119136	NUDT13/TKT/NNT/IDH2/MDH1/PC/IDH1/NQO1	8
high	GO:1901655	cellular response to ketone	14/1012	112/21069	0.00095166	0.0157052	0.0124799	AQP1/GNG2/MSN/FOS/ERRFI1/AIFM1/FDX1/PCK2/PTGER4/SRD5A1/FBXO32/PRKCE/IGF1R/KLF2	14
high	GO:0042113	B cell activation	31/1012	354/21069	0.00097801	0.0159491	0.0126736	TCIRG1/CTPS1/CMTM7/KIT/SH3KBP1/LAPTM5/SKAP2/TLR4/IL2RG/NOTCH2/NSD2/CDKN1A/BCL3/PLCL2/HHEX/MMP14/MFNG/LGALS1/KLF6/CD74/CASP8/LYN/TNFRSF21/PTPN6/TGFB1/MEF2C/SPI1/DLL1/SLC25A5/CLCF1/NDFIP1	31
high	GO:0034389	lipid droplet organization	7/1012	34/21069	0.000994114	0.0159731	0.0126927	BSCL2/PNPLA2/PLIN2/PTGFRN/LDAF1/FITM2/FITM1	7
high	GO:0007584	response to nutrient	18/1012	165/21069	0.000999765	0.0159731	0.0126927	ALAD/TRIM24/ACSL1/AGL/ARSB/CDKN2D/LPL/COL1A1/GCLC/HMOX1/POR/CCND1/AHCY/CYBB/NQO1/CAT/IGF1R/OXCT1	18
high	GO:0071322	cellular response to carbohydrate stimulus	18/1012	165/21069	0.000999765	0.0159731	0.0126927	MAP2K6/UCP2/RAB11FIP5/CALCRL/SRI/PCK2/SLC29A1/GCLC/PPP3CA/SLC12A6/SLC39A14/PPP3CB/PRKCE/HIF1A/IGF1R/OXCT1/SOX4/CYBA	18
high	GO:0072348	sulfur compound transport	10/1012	65/21069	0.00101089	0.0161041	0.0127968	CTNS/GJA1/SLC25A11/SLC5A6/MGST1/SLC9A3R1/SLC26A11/SLC27A1/SLC3A1/SLC25A10	10
high	GO:0051057	positive regulation of small GTPase mediated signal transduction	11/1012	77/21069	0.00108613	0.017154	0.0136311	CSF1/PRAG1/F2RL2/MAPRE2/NOTCH2/TGM2/MCF2L/ITGAV/F2R/ARRB1/COL3A1	11
high	GO:2000377	regulation of reactive oxygen species metabolic process	18/1012	167/21069	0.00114916	0.0179983	0.014302	CRYAB/CTNS/THBS1/SLC18A2/ACP5/PINK1/TLR4/PPARA/STK17A/CDKN1A/RAC2/GADD45A/RIPK3/TGFB1/HIF1A/PDGFB/GCH1/CYBA	18
high	GO:0003206	cardiac chamber morphogenesis	15/1012	127/21069	0.00114938	0.0179983	0.014302	SMAD6/FHL2/NOTCH2/NSD2/NRP2/JAG1/NRP1/TGFB1/MEF2C/HIF1A/HEG1/TGFBR3/DHRS3/FGFRL1/SOX4	15
high	GO:0090287	regulation of cellular response to growth factor stimulus	31/1012	358/21069	0.00117235	0.0182542	0.0145053	SMAD6/JCAD/THBS1/FBN1/TGFB1I1/DCN/LTBP4/SAP130/CREB3L1/SULF2/NOTCH2/PPARA/CRIM1/EMILIN1/TMEM53/NIBAN2/ACVRL1/HHEX/EID2/DAB2/ZNF451/NRP1/TGFB1/UBE2D1/HIF1A/FSTL1/TGFBR3/CDKN1C/DLL1/FZD4/VASN	31
high	GO:0050886	endocrine process	13/1012	102/21069	0.00119108	0.0184524	0.0146628	AQP1/GJA1/EDNRB/RAB11FIP5/KDM5B/POMC/RAB8B/NIBAN2/DAB2/CTSZ/F2R/FZD4/CYBA	13
high	GO:0055094	response to lipoprotein particle	7/1012	35/21069	0.00119177	0.0184524	0.0146628	CD68/MYD88/TLR4/APOE/LPL/CD9/FCER1G	7
high	GO:0048661	positive regulation of smooth muscle cell proliferation	14/1012	115/21069	0.00123487	0.0188549	0.0149827	MYD88/GJA1/THBS1/S1PR1/TLR4/CALCRL/HMOX1/IL6R/TGFB1/AIF1/IGF1R/PDGFB/NOTCH3/CYBA	14
high	GO:0051900	regulation of mitochondrial depolarization	5/1012	18/21069	0.00128412	0.0194452	0.0154518	DCN/IFI6/BOK/MLLT11/GCLC	5
high	GO:0006778	porphyrin-containing compound metabolic process	9/1012	56/21069	0.00130005	0.0195256	0.0155156	ALAD/BDH2/ALAS1/SUCLA2/BLVRB/BLVRA/HMOX1/SLCO2B1/PGRMC1	9
high	GO:0001558	regulation of cell growth	38/1012	471/21069	0.0013111	0.019638	0.0156049	CRYAB/CXCR4/GJA1/PI16/CHPT1/IGFBP3/LTBP4/CXCL12/RNF6/PPARA/FN1/CDKN1A/IGFBP4/SERPINE2/APOE/CDKN2D/ACVRL1/SH3BP4/SIPA1/RPS6KA1/MMP14/DCBLD2/DAB2/RYK/TSPYL2/PTPRS/SEMA3F/DPYSL2/CRLF3/EPB41L3/CAPRIN2/NRP1/TGFB1/ERBB2/CXCL16/LIMK1/CYBA/TWF2	38
high	GO:0035051	cardiocyte differentiation	18/1012	169/21069	0.00131713	0.0196749	0.0156343	FHL2/PI16/FZD7/PDGFRA/PPARA/JAG1/PDLIM5/SGCB/MYH11/LMNA/SIRT6/TGFB1/MEF2C/ACADM/TGFBR3/DLL1/ARRB2/OBSL1	18
high	GO:0002604	regulation of dendritic cell antigen processing and presentation	4/1012	11/21069	0.00133088	0.0197199	0.01567	CD68/THBS1/FGL2/CD74	4
high	GO:0014823	response to activity	11/1012	79/21069	0.00134662	0.0198996	0.0158128	ALAD/CXCR4/FOS/METRNL/SRD5A1/GCLC/UQCRC1/HIF1A/CAT/OXCT1/CYBA	11
high	GO:0009410	response to xenobiotic stimulus	38/1012	472/21069	0.00136197	0.0200727	0.0159504	EPHX1/ALAD/VKORC1/CXCR4/SMOX/ATP1A1/MAP2K6/CTPS1/THBS1/CRYZ/FOS/ACSL1/CHEK2/PLIN2/RNF149/PDE4B/CMBL/LPL/COL1A1/SRD5A1/GCLC/HMOX1/SLCO2B1/POR/CCND1/ACAA1/TPMT/CYBB/LYN/NCEH1/RAP2A/NQO1/MEF2C/CAT/AGPAT2/SORD/OXCT1/CYBA	38
high	GO:2000106	regulation of leukocyte apoptotic process	13/1012	104/21069	0.00142672	0.0207495	0.0164882	HCLS1/LGALS3/CXCL12/BCL3/GPAM/ORMDL3/CD74/ANXA1/KIFAP3/RIPK3/LYN/MEF2C/HIF1A	13
high	GO:0003170	heart valve development	10/1012	68/21069	0.00144238	0.0208673	0.0165817	SMAD6/NFATC1/NOTCH2/EMILIN1/JAG1/TGFB1/MEF2C/TNFRSF1B/FGFRL1/SOX4	10
high	GO:0060537	muscle tissue development	36/1012	442/21069	0.00147258	0.0210618	0.0167364	NR4A1/FHL2/GJA1/PI16/FZD7/HOPX/BCL9/FOS/S1PR1/PDGFRA/NOTCH2/PPARA/ATF3/YBX3/EGR1/PDLIM5/NIBAN2/SGCB/CFL2/MYH11/PPP3CA/LMNA/PPP3CB/SIRT6/TGFB1/MEF2C/HEG1/MAFF/COL3A1/ACADM/TGFBR3/HOMER1/SVIL/DLL1/ARRB2/OBSL1	36
high	GO:0010761	fibroblast migration	9/1012	57/21069	0.00147916	0.0210618	0.0167364	AQP1/THBS1/TNS1/CYGB/SLC9A3R1/ACTA2/SDC4/TGFB1/PRKCE	9
high	GO:0051881	regulation of mitochondrial membrane potential	11/1012	80/21069	0.00149489	0.0211728	0.0168245	HEBP2/CTNS/DCN/UCP2/PINK1/IFI6/BOK/MLLT11/GCLC/RNF122/NDUFS1	11
high	GO:0045936	negative regulation of phosphate metabolic process	39/1012	491/21069	0.00151655	0.0212702	0.016902	SMAD6/LGALS3/IGFBP3/WARS1/DBNDD2/PKIG/ERRFI1/LPIN1/PPARA/CDKN1A/CAMK2N1/CEP85/APOE/CDKN2D/LRP1/EMILIN1/GADD45A/DUSP1/HHEX/NIBAN1/PRKAR2B/MFHAS1/TRIB2/PARP14/SLC27A1/ADARB1/PIP4K2A/SIRT6/LYN/PTPN6/DBNDD1/TGFB1/HEG1/CSK/PDGFB/INPP5F/CDKN1C/ARRB2/PRKAR1B	39
high	GO:0000302	response to reactive oxygen species	21/1012	214/21069	0.00156102	0.0217831	0.0173095	CRYAB/AQP1/UCP2/FOS/PINK1/AIFM1/PDGFRA/APOE/CAMKK2/COL1A1/HMOX1/ANXA1/PPIF/RIPK3/STK26/NQO1/HIF1A/CAT/SETX/GCH1/KLF2	21
high	GO:0030865	cortical cytoskeleton organization	10/1012	69/21069	0.00161564	0.0223193	0.0177356	RHOG/RHOBTB3/EPB41L2/LCP1/RAC2/RHOQ/RHOBTB1/EPB41L3/CAVIN3/FMNL2	10
high	GO:0001503	ossification	38/1012	477/21069	0.00164307	0.0226415	0.0179916	CSF1/TCIRG1/SMAD6/BMP1/TENT5A/FHL2/MAP2K6/ECM1/IGFBP3/TP53INP2/S1PR1/CREB3L1/RFLNB/HSD17B4/CHSY1/CRIM1/KREMEN1/TMEM53/JAG1/COL1A1/COL1A2/ISG15/MMP14/PTGER4/FASN/PPP3CA/GABBR1/TUFT1/SRGN/IL6R/TGFB1/MEF2C/HIF1A/CAT/CTSK/DHRS3/TMEM38B/CEBPB	38
high	GO:0097067	cellular response to thyroid hormone stimulus	5/1012	19/21069	0.00167439	0.0228441	0.0181526	KIT/LMO2/CTSH/GCLC/CTSS	5
high	GO:0002931	response to ischemia	9/1012	58/21069	0.00167757	0.0228441	0.0181526	CSF1/MAP2K6/PINK1/AIFM1/EGR1/CSF1R/PPIF/NQO1/MEF2C	9
high	GO:1902600	proton transmembrane transport	18/1012	173/21069	0.00171618	0.0231519	0.0183972	TCIRG1/CTNS/ATP1A1/ATP1B1/ATP5MC3/UCP2/ATP6V0E2/PM20D1/SLC9A3R1/NNT/CYB5A/CYC1/PPIF/UQCRC1/NDUFS7/SLC9A9/SLC25A5/UQCRFS1	18
high	GO:0045444	fat cell differentiation	25/1012	275/21069	0.00174563	0.0234109	0.018603	NR4A1/SMAD6/INSIG1/TGFB1I1/BSCL2/ARL4A/PSMB8/STK4/MAFB/ATF5/ZNF516/METRNL/PDGFRA/JDP2/TMEM120B/JAG1/LPL/TRIB2/RETREG1/CCND1/ALDH6A1/CLIP3/SIRT6/TGFB1/CEBPB	25
high	GO:0007178	transmembrane receptor protein serine/threonine kinase signaling pathway	34/1012	415/21069	0.0017838	0.0238648	0.0189637	SMAD6/PPM1L/LRRC32/THBS1/FBN1/TGFB1I1/FOS/LTBP4/SAP130/NOTCH2/PPARA/CRIM1/EGR1/LRP1/EMILIN1/TMEM53/COL1A2/ACVRL1/FMOD/EID2/DAB2/VIM/ZNF451/NCEH1/TGFB1/UBE2D1/COL3A1/SPI1/FSTL1/TGFBR3/CDKN1C/RBPMS/ARRB2/VASN	34
high	GO:0051348	negative regulation of transferase activity	27/1012	306/21069	0.0018049	0.0240369	0.0191004	WARS1/DBNDD2/PKIG/ERRFI1/CDKN1A/CAMK2N1/CEP85/DTX3L/APOE/CDKN2D/ORMDL3/GADD45A/DUSP1/HHEX/PRKAR2B/TRIB2/ADARB1/PIP4K2A/LYN/PTPN6/DBNDD1/HEG1/CSK/MAD2L1/CDKN1C/LIMK1/PRKAR1B	27
high	GO:0070372	regulation of ERK1 and ERK2 cascade	31/1012	368/21069	0.00181152	0.0240605	0.0191192	NDRG2/TLR4/ERRFI1/PDGFRA/NOTCH2/FN1/ATF3/APOE/EMILIN1/SLC9A3R1/CD44/CSF1R/ACTA2/CD74/MFHAS1/DAB2/ACKR3/CAVIN3/NRP1/LYN/F2R/PTPN6/TGFB1/ARRB1/RAMP3/RRAS/CSK/PDGFB/ERBB2/ARRB2/CCL2	31
high	GO:0046651	lymphocyte proliferation	33/1012	400/21069	0.00184765	0.0243061	0.0193144	MYD88/LRRC32/CTPS1/LGALS3/MSN/TLR4/EMP2/CDKN1A/CORO1A/PLCL2/VSIR/RAC2/GPAM/HLA-DMB/SDC4/CD74/ANXA1/PPP3CA/RIPK3/ELF4/PPP3CB/CD276/LYN/TNFRSF21/PTPN6/AIF1/MEF2C/ERBB2/TNFRSF1B/IRF1/CLCF1/NDFIP1/CEBPB	33
high	GO:0001836	release of cytochrome c from mitochondria	9/1012	59/21069	0.00189673	0.0247158	0.0196399	PINK1/IFI6/BOK/FAM162A/MLLT11/PPIF/LMNA/TNFSF10/ARRB2	9
high	GO:0000727	double-strand break repair via break-induced replication	4/1012	12/21069	0.00192078	0.0249702	0.0198421	MCM3/MCM2/MCM6/MCM4	4
high	GO:1901136	carbohydrate derivative catabolic process	19/1012	189/21069	0.0019359	0.0251074	0.0199511	CST3/ENPP4/CEMIP2/SUCLA2/ALDH1A1/PDE4B/GDA/CD44/ACAT1/GPD1/AHCY/FITM2/ENTPD5/TGFB1/GM2A/MAN1A1/DPYD/FBXO44/DCTPP1	19
high	GO:0006606	protein import into nucleus	18/1012	175/21069	0.00195121	0.0251875	0.0200148	HCLS1/IPO4/STK4/KPNA3/NXT1/PKIG/CDKN1A/BCL3/FLNA/KPNA2/PPP3CA/LMNA/JUP/IPO13/SIRT6/TGFB1/UBR5/SNUPN	18
high	GO:0071402	cellular response to lipoprotein particle stimulus	7/1012	38/21069	0.00197349	0.0253153	0.0201163	CD68/MYD88/TLR4/APOE/LPL/CD9/FCER1G	7
high	GO:0008637	apoptotic mitochondrial changes	14/1012	121/21069	0.0020152	0.0257721	0.0204793	ACAA2/PINK1/IFI6/BOK/FAM162A/MLLT11/GCLC/PPIF/LMNA/TNFSF10/NDUFS1/CHCHD10/ARRB2/SLC25A5	14
high	GO:0010232	vascular transport	12/1012	96/21069	0.00214332	0.0270875	0.0215245	SLC22A5/SLC5A6/SLC2A1/APOE/LRP1/SLC9A3R1/SLC1A5/ATP2A3/SLC29A1/SLCO2B1/SLC27A1/FABP5	12
high	GO:0150104	transport across blood-brain barrier	12/1012	96/21069	0.00214332	0.0270875	0.0215245	SLC22A5/SLC5A6/SLC2A1/APOE/LRP1/SLC9A3R1/SLC1A5/ATP2A3/SLC29A1/SLCO2B1/SLC27A1/FABP5	12
high	GO:0071333	cellular response to glucose stimulus	16/1012	149/21069	0.00219028	0.0275007	0.0218529	UCP2/RAB11FIP5/SRI/PCK2/SLC29A1/GCLC/PPP3CA/SLC12A6/SLC39A14/PPP3CB/PRKCE/HIF1A/IGF1R/OXCT1/SOX4/CYBA	16
high	GO:0008654	phospholipid biosynthetic process	26/1012	295/21069	0.00220516	0.0276246	0.0219513	SERINC5/CHPT1/HYCC1/LPIN1/SAMD8/CHKA/HMGCS1/GPAM/ORMDL3/MBOAT1/SLC27A1/ISYNA1/PMVK/PIP4K2A/LCAT/FITM2/AGPAT3/IDH1/DGKD/HYCC2/FITM1/PDGFB/INPP5F/AGPAT2/TMEM38B/FABP5	26
high	GO:0071549	cellular response to dexamethasone stimulus	6/1012	29/21069	0.00222066	0.0277557	0.0220555	AQP1/ERRFI1/PCK2/SRD5A1/FBXO32/IGF1R	6
high	GO:0043403	skeletal muscle tissue regeneration	7/1012	39/21069	0.00230706	0.0286407	0.0227588	FZD7/HOPX/BCL9/PTGFRN/CD9/ANXA1/PPP3CA	7
high	GO:0043254	regulation of protein-containing complex assembly	36/1012	454/21069	0.00232054	0.0287434	0.0228403	CRYAB/MYD88/SMAD6/HCLS1/PDE4DIP/LGALS3/FSCN1/MSN/WARS1/TAL1/PINK1/TLR4/LCP1/SEPTIN8/CORO1A/MAPRE3/APOE/PAK1/SSH2/PFN2/ISG15/TMOD1/PTGER4/COTL1/LCAT/BIN1/VASP/CLIP3/GSN/TGFB1/PRKCE/CYRIB/PIEZO1/SVIL/NAPB/TWF2	36
high	GO:0010212	response to ionizing radiation	16/1012	150/21069	0.00234534	0.0288561	0.0229299	POLB/ALAD/CRYAB/MAP3K20/UIMC1/USP28/RFWD3/CHEK2/CDKN1A/EGR1/GADD45A/RHNO1/ANXA1/CCND1/THBD/CYBA	16
high	GO:0031346	positive regulation of cell projection organization	31/1012	375/21069	0.00242093	0.0296537	0.0235637	STAU2/KIT/DVL2/FSCN1/CCP110/CORO1B/CXCL12/FN1/ARSB/APOE/DPYSL3/RAC2/RAB8B/FLNA/RHOQ/CCDC88A/GRN/CAPRIN2/PALM/NRP1/LYN/NIN/IGF1R/NCKIPSD/SETX/ENC1/GPRASP2/FZD4/OBSL1/LIMK1/TWF2	31
high	GO:0042304	regulation of fatty acid biosynthetic process	8/1012	50/21069	0.00245653	0.0298453	0.023716	INSIG1/ACADVL/ELOVL5/NR1H3/PDK4/CD74/ANXA1/FABP5	8
high	GO:0051170	import into nucleus	18/1012	179/21069	0.0025031	0.0302008	0.0239985	HCLS1/IPO4/STK4/KPNA3/NXT1/PKIG/CDKN1A/BCL3/FLNA/KPNA2/PPP3CA/LMNA/JUP/IPO13/SIRT6/TGFB1/UBR5/SNUPN	18
high	GO:0042167	heme catabolic process	4/1012	13/21069	0.00266968	0.0313313	0.0248968	BLVRB/BLVRA/HMOX1/SLCO2B1	4
high	GO:0046149	pigment catabolic process	4/1012	13/21069	0.00266968	0.0313313	0.0248968	BLVRB/BLVRA/HMOX1/SLCO2B1	4
high	GO:0070486	leukocyte aggregation	4/1012	13/21069	0.00266968	0.0313313	0.0248968	MSN/RAC2/CD44/STK10	4
high	GO:2001046	positive regulation of integrin-mediated signaling pathway	4/1012	13/21069	0.00266968	0.0313313	0.0248968	LIMS2/EMP2/FLNA/LAMC1	4
high	GO:0002224	toll-like receptor signaling pathway	16/1012	152/21069	0.00268294	0.0313313	0.0248968	MYD88/UNC93B1/TLR4/NR1H3/CD14/MFHAS1/RSAD2/CTSS/PTPRS/LYN/PRKCE/BIRC3/RFTN1/IRF1/ARRB2/CYBA	16
high	GO:1903317	regulation of protein maturation	11/1012	86/21069	0.0026904	0.0313519	0.0249132	CAST/THBS1/PLAU/SERPINE2/SPON1/PRKACB/MMP14/CTSZ/GSN/LDLRAD3/SOX4	11
high	GO:0035023	regulation of Rho protein signal transduction	12/1012	99/21069	0.00278264	0.0320755	0.0254881	PRAG1/F2RL2/ARHGDIB/APOE/MYO9B/KCTD13/MCF2L/NRP1/F2R/ARRB1/HEG1/COL3A1	12
high	GO:0051153	regulation of striated muscle cell differentiation	12/1012	99/21069	0.00278264	0.0320755	0.0254881	PI16/FZD7/HOPX/PPARA/RBM38/NIBAN2/MMP14/TGFB1/MEF2C/PIEZO1/DLL1/ARRB2	12
high	GO:0071229	cellular response to acid chemical	12/1012	99/21069	0.00278264	0.0320755	0.0254881	PDGFRA/COL1A1/COL1A2/SH3BP4/SIPA1/GCLC/CASTOR1/CYBB/COL3A1/CYBA/CEBPB/KLF2	12
high	GO:0090257	regulation of muscle system process	24/1012	270/21069	0.00286021	0.0327765	0.0260452	NR4A1/ATP1A1/ATP2A2/EHD3/PI16/ATP1B1/KIT/GRK2/ERRFI1/PPARA/CALCRL/PDE4B/SRI/ORMDL3/PPP3CA/FBXO32/LMNA/JUP/BIN1/F2R/AIF1/DOCK4/TNFRSF1B/TMEM38B	24
high	GO:1901292	nucleoside phosphate catabolic process	11/1012	87/21069	0.00294924	0.033518	0.0266344	NUDT13/SUCLA2/PDE4B/GDA/ACAT1/FITM2/ENTPD5/SMPDL3A/CNP/DPYD/DCTPP1	11
high	GO:0060986	endocrine hormone secretion	9/1012	63/21069	0.00301209	0.0340997	0.0270967	AQP1/GJA1/RAB11FIP5/KDM5B/POMC/RAB8B/NIBAN2/DAB2/FZD4	9
high	GO:0051047	positive regulation of secretion	28/1012	333/21069	0.0030128	0.0340997	0.0270967	AQP1/MAP2K6/PFKFB2/NNAT/CXCL12/EDNRB/GRK2/PINK1/TLR4/ATP13A2/SRI/RAB8B/CLASP2/PCK2/SDC4/PPP3CA/DAB2/GABBR1/MYO18A/PPP3CB/SIRT6/TGFB1/PRKCE/HIF1A/OXCT1/RGCC/SOX4/CYBA	28
high	GO:0015849	organic acid transport	29/1012	349/21069	0.00304606	0.0343355	0.027284	CTNS/MAP2K6/SERINC5/GJA1/THBS1/SLC25A13/ACSL1/SLC25A11/PLIN2/SLC5A6/PPARA/SLC25A1/SLC2A1/APOE/SLC9A3R1/SLC43A2/SLC1A5/SLC7A7/SLCO2B1/ANXA1/SLC27A1/GABBR1/SLC3A1/SLC16A3/CROT/MPC1/FABP5/SFXN5/SLC25A10	29
high	GO:0048659	smooth muscle cell proliferation	19/1012	197/21069	0.00309403	0.0346926	0.0275678	MYD88/NDRG2/GJA1/THBS1/IGFBP3/S1PR1/TLR4/CDKN1A/CALCRL/APOE/HMOX1/IL6R/TGFB1/AIF1/MEF2C/IGF1R/PDGFB/NOTCH3/CYBA	19
high	GO:0035886	vascular associated smooth muscle cell differentiation	7/1012	41/21069	0.00310295	0.0346926	0.0275678	NFATC1/KIT/QKI/SGCB/RAMP2/ADM/PDGFB	7
high	GO:0001933	negative regulation of protein phosphorylation	30/1012	366/21069	0.00319187	0.0356145	0.0283004	SMAD6/IGFBP3/WARS1/DBNDD2/PKIG/ERRFI1/CDKN1A/CAMK2N1/CEP85/APOE/CDKN2D/LRP1/EMILIN1/GADD45A/DUSP1/HHEX/NIBAN1/PRKAR2B/TRIB2/PARP14/ADARB1/LYN/PTPN6/DBNDD1/TGFB1/HEG1/INPP5F/CDKN1C/ARRB2/PRKAR1B	30
high	GO:0005976	polysaccharide metabolic process	13/1012	114/21069	0.00325924	0.0361284	0.0287087	GYG1/SORBS1/CSGALNACT1/PYGB/AGL/CHST7/POMC/PPP1R3B/KHK/TGFB1/PDGFB/ACADM/GYS1	13
high	GO:0007266	Rho protein signal transduction	16/1012	155/21069	0.00326414	0.0361284	0.0287087	RHOG/PRAG1/F2RL2/ARHGDIB/APOE/MYO9B/COL1A2/KCTD13/MCF2L/ARHGEF1/NRP1/F2R/ARRB1/HEG1/COL3A1/LIMK1	16
high	GO:0061082	myeloid leukocyte cytokine production	9/1012	64/21069	0.00335883	0.0365755	0.029064	MYD88/KIT/RIGI/ACP5/LAPTM5/TLR4/CD74/HMOX1/TGFB1	9
high	GO:0070542	response to fatty acid	9/1012	64/21069	0.00335883	0.0365755	0.029064	ALAD/UCP2/ACSL1/LPL/CLDN1/PDK4/CAT/MBP/SCD	9
high	GO:0006875	cellular metal ion homeostasis	35/1012	448/21069	0.00336305	0.0365755	0.029064	TCIRG1/SLC39A6/ATP1A1/ATP2A2/ATP1B1/SLC25A23/CXCL12/SLC31A2/SLC41A1/RAP1GDS1/CYBRD1/ATP13A2/CORO1A/BOK/APOE/SRI/SLC40A1/ANKRD9/FLNA/ATP13A3/ATP1B3/ATP2A3/HMOX1/TGM2/SLC22A17/SLC39A14/LYN/F2R/PTPN6/PRKCE/HIF1A/TMEM38B/WFS1/NDFIP1/CYBA	35
high	GO:0042552	myelination	16/1012	156/21069	0.00347952	0.0377542	0.0300006	NDRG1/CXCR4/SERINC5/HYCC1/LPIN1/CTSC/QKI/ORMDL3/CD9/ACER3/PMP22/EPB41L3/TNFRSF21/ERBB2/MBP/TNFRSF1B	16
high	GO:0055072	iron ion homeostasis	11/1012	89/21069	0.00352697	0.0380443	0.0302312	BDH2/EPAS1/CYBRD1/ATP13A2/SRI/SLC40A1/HMOX1/SLC22A17/SLC39A14/HIF1A/NDFIP1	11
high	GO:0019320	hexose catabolic process	7/1012	42/21069	0.00357201	0.0382714	0.0304116	PKM/PFKFB2/ENO3/TKFC/TPI1/GALM/GLYCTK	7
high	GO:0070278	extracellular matrix constituent secretion	4/1012	14/21069	0.00359663	0.0382714	0.0304116	CREB3L1/TNFRSF1B/TMEM38B/RGCC	4
high	GO:1902969	mitotic DNA replication	4/1012	14/21069	0.00359663	0.0382714	0.0304116	MCM3/MCM2/MCM6/MCM4	4
high	GO:1904044	response to aldosterone	4/1012	14/21069	0.00359663	0.0382714	0.0304116	AIFM1/CYBB/IGF1R/CYBA	4
high	GO:0071480	cellular response to gamma radiation	6/1012	32/21069	0.00374781	0.0395745	0.0314471	CRYAB/MAP3K20/CHEK2/CDKN1A/EGR1/CYBA	6
high	GO:0003015	heart process	24/1012	276/21069	0.0037853	0.039894	0.031701	CXCR4/ATP1A1/ATP2A2/MAP2K6/EHD3/GJA1/HOPX/ATP1B1/EPAS1/EDNRB/GRK2/RAP1GDS1/PDE4B/SRI/FLNA/ATP2A3/HCN2/JUP/BIN1/GSN/RAMP3/ADM/TMEM38B/GCH1	24
high	GO:0032722	positive regulation of chemokine production	11/1012	90/21069	0.00384798	0.0404001	0.0321032	MYD88/TLR4/EGR1/CSF1R/LPL/CD74/HMOX1/IL6R/AIF1/HIF1A/MBP	11
high	GO:0007163	establishment or maintenance of cell polarity	22/1012	246/21069	0.00388983	0.0406845	0.0323291	SPINT2/TCIRG1/RHOG/AQP1/GJA1/FSCN1/MSN/RHOBTB3/MYO9A/CLIC4/RAC2/CLASP2/SLC9A3R1/RHOQ/MYO18A/LMNA/GPSM1/RHOBTB1/GSN/CYRIB/IGF1R/MAD2L1	22
high	GO:0031098	stress-activated protein kinase signaling cascade	24/1012	277/21069	0.00396157	0.0411227	0.0326773	CRYAB/MYD88/MAP4K2/MAP3K20/MAP2K6/MAPK8IP3/FZD7/GADD45G/PINK1/TLR4/GADD45A/DUSP1/PTGER4/SH2D3C/MFHAS1/RELL2/MAP3K10/STRADB/LYN/RAP2A/IGFBP6/IGF1R/SPI1/TRAF4	24
high	GO:0010939	regulation of necrotic cell death	8/1012	54/21069	0.00402236	0.041597	0.0330543	HEBP2/AIFM1/BOK/YBX3/CASP8/PPIF/RIPK3/BIRC3	8
high	GO:0006268	DNA unwinding involved in DNA replication	5/1012	23/21069	0.00413108	0.0421631	0.033504	MCM3/MCM2/MCM6/MCM4/HMGA1	5
high	GO:1905952	regulation of lipid localization	19/1012	203/21069	0.00430072	0.0435764	0.0346271	MAP2K6/THBS1/SCP2/ACSL1/PNPLA2/PLIN2/KDM5B/POMC/PPARA/APOE/NR1H3/LRP1/LPL/SCARB1/DAB2/EEPD1/ITGAV/FITM2/FITM1	19
high	GO:0030947	regulation of vascular endothelial growth factor receptor signaling pathway	6/1012	33/21069	0.00439773	0.0439135	0.034895	EMILIN1/NIBAN2/HHEX/NRP1/HIF1A/FZD4	6
high	GO:0048679	regulation of axon regeneration	6/1012	33/21069	0.00439773	0.0439135	0.034895	KREMEN1/FLNA/PTPRS/GRN/IGF1R/INPP5F	6
high	GO:0098801	regulation of renal system process	6/1012	33/21069	0.00439773	0.0439135	0.034895	EDNRB/EMP2/SLC9A3R1/F2R/PDGFB/CYBA	6
high	GO:0003018	vascular process in circulatory system	25/1012	295/21069	0.00441959	0.044052	0.0350051	SLC22A5/EDNRB/VSTM4/SLC5A6/RAP1GDS1/SCPEP1/SLC2A1/APOE/LRP1/SLC9A3R1/SLC1A5/ACTA2/ATP2A3/SLC29A1/GCLC/SLCO2B1/SLC27A1/RAMP2/F2R/TGFB1/ADM/DOCK4/GCH1/FABP5/KLF2	25
high	GO:0032024	positive regulation of insulin secretion	10/1012	79/21069	0.00445271	0.0442222	0.0351403	PFKFB2/NNAT/SRI/PCK2/PPP3CB/SIRT6/PRKCE/HIF1A/OXCT1/SOX4	10
high	GO:0022898	regulation of transmembrane transporter activity	26/1012	311/21069	0.00448025	0.044336	0.0352307	EHD3/ATP1B1/PINK1/GEM/HSPA2/PDE4B/PM20D1/SRI/SLC9A3R1/AHNAK/ATP1B3/FXYD6/HCN2/PPP3CA/PPIF/CTSS/PPP3CB/PRKCE/MEF2C/SLMAP/HOMER1/SHANK3/YWHAH/FXYD5/CCL2/VAMP2	26
high	GO:0060048	cardiac muscle contraction	15/1012	146/21069	0.00450912	0.0444225	0.0352994	CXCR4/ATP1A1/ATP2A2/MAP2K6/EHD3/GJA1/ATP1B1/GRK2/PDE4B/SRI/FLNA/JUP/BIN1/GSN/TMEM38B	15
high	GO:0048146	positive regulation of fibroblast proliferation	8/1012	55/21069	0.00451317	0.0444225	0.0352994	AQP1/PDGFRA/FN1/CDKN1A/CD74/SIRT6/PDGFB/FOSL2	8
high	GO:0046939	nucleotide phosphorylation	12/1012	105/21069	0.00452463	0.0444559	0.035326	DHTKD1/PKM/PFKFB2/ENO3/OGDH/PPARA/ALDOA/GPD1/PGM1/TPI1/SIRT6/HIF1A	12
high	GO:0051353	positive regulation of oxidoreductase activity	9/1012	67/21069	0.00458995	0.0448578	0.0356453	APOE/FDX1/SCARB1/POR/RIPK3/HIF1A/GCH1/PDP2/CYBA	9
high	GO:0001921	positive regulation of receptor recycling	4/1012	15/21069	0.0047199	0.0455623	0.0362052	RAB29/NSF/RAMP3/INPP5F	4
high	GO:0030174	regulation of DNA-templated DNA replication initiation	4/1012	15/21069	0.0047199	0.0455623	0.0362052	MCM3/MCM2/MCM6/MCM4	4
high	GO:0140042	lipid droplet formation	4/1012	15/21069	0.0047199	0.0455623	0.0362052	BSCL2/LDAF1/FITM2/FITM1	4
high	GO:1902043	positive regulation of extrinsic apoptotic signaling pathway via death domain receptors	4/1012	15/21069	0.0047199	0.0455623	0.0362052	THBS1/STK4/PEA15/ATF3	4
high	GO:0048738	cardiac muscle tissue development	22/1012	251/21069	0.00493434	0.0474661	0.037718	FHL2/GJA1/PI16/FZD7/HOPX/S1PR1/PDGFRA/NOTCH2/PPARA/PDLIM5/SGCB/MYH11/LMNA/SIRT6/TGFB1/MEF2C/HEG1/ACADM/TGFBR3/DLL1/ARRB2/OBSL1	22
high	GO:0014910	regulation of smooth muscle cell migration	11/1012	93/21069	0.00495292	0.0475619	0.0377941	IGFBP3/CORO1B/PLAU/TLR4/LRP1/NRP1/ABHD2/AIF1/MEF2C/DOCK4/PDGFB	11
high	GO:0043030	regulation of macrophage activation	9/1012	68/21069	0.00507008	0.0481833	0.0382879	GPR137B/THBS1/TLR4/NR1H3/CTSC/CD74/MFHAS1/MYO18A/GRN	9
high	GO:0038094	Fc-gamma receptor signaling pathway	6/1012	34/21069	0.00512707	0.0483887	0.0384511	PAK1/CD247/LYN/PRKCE/FCER1G/LIMK1	6
high	GO:0060544	regulation of necroptotic process	6/1012	34/21069	0.00512707	0.0483887	0.0384511	AIFM1/BOK/YBX3/CASP8/RIPK3/BIRC3	6
high	GO:0071353	cellular response to interleukin-4	6/1012	34/21069	0.00512707	0.0483887	0.0384511	ALAD/IL2RG/CORO1A/MCM2/FASN/PARP14	6
high	GO:0031668	cellular response to extracellular stimulus	24/1012	283/21069	0.00516971	0.0486271	0.0386405	CD68/TRIM24/UCP2/FOS/PLIN2/AIFM1/PPARA/CDKN1A/ATF3/SLC2A1/LPL/COL1A1/MIOS/SIPA1/PDK4/SRD5A1/HMOX1/STK26/LYN/SIK2/AIF1/CTSK/IGF1R/DCTPP1	24
high	GO:0070252	actin-mediated cell contraction	12/1012	107/21069	0.00526842	0.0494711	0.0393112	ATP1A1/ATP2A2/GJA1/EMP2/PDE4B/SRI/FLNA/ACTA2/JUP/BIN1/GSN/FRMD6	12
high	GO:0032409	regulation of transporter activity	28/1012	347/21069	0.00530916	0.0496159	0.0394262	EHD3/ATP1B1/PINK1/GEM/HSPA2/PDE4B/PM20D1/SRI/NR1H3/SLC9A3R1/AHNAK/ATP1B3/FXYD6/HCN2/PPP3CA/PPIF/CTSS/PPP3CB/PRKCE/MEF2C/SLMAP/HOMER1/SHANK3/YWHAH/FXYD5/CCL2/NDFIP1/VAMP2	28
high	GO:0050767	regulation of neurogenesis	32/1012	412/21069	0.00533785	0.0496159	0.0394262	CXCR4/STAU2/KIT/CXCL12/RNF6/PCM1/FN1/SERPINE2/PPP3CA/TGM2/RYK/KIFAP3/PTPRS/SEMA3F/BIN1/CAPRIN2/HLTF/NRP1/LYN/NIN/TGFB1/HIF1A/MBP/TNFRSF1B/SHANK3/YWHAH/DLL1/GPRASP2/OBSL1/LIMK1/CLCF1/TWF2	32
high	GO:1901568	fatty acid derivative metabolic process	11/1012	94/21069	0.00537237	0.0497689	0.0395479	ELOVL5/ACSL1/HSD17B4/SLC25A1/PTGR1/ACAT1/GCDH/FITM2/HMGCL/HACD1/OXCT1	11
medium	GO:0018205	peptidyl-lysine modification	105/2299	457/21069	6.76485e-14	4.06906e-10	3.42657e-10	VPS33B/SIRT7/RANBP2/ARID4B/PLOD3/MSL2/ETFBKMT/OGT/USPL1/EPC1/PHF1/SIRT3/MEN1/NSMCE1/YEATS4/ACTL6A/UBA2/SAE1/KMT2B/KAT6B/SETD2/NAA40/MCM3AP/SMARCA5/KDM6A/KAT6A/GTF3C4/BOD1L1/PBXIP1/PWP1/DIP2B/PIAS1/EHMT2/TOPORS/TRIM28/PHF20L1/ATAT1/TRRAP/NCOA3/TADA3/DR1/KMT2E/NSMCE2/KDM1A/TAF5/NFYA/MBIP/SIN3A/SMARCB1/HAT1/TADA1/ATXN7/PCGF2/HDAC2/SLF2/KANSL1/JARID2/HDAC6/RELA/YEATS2/GNL3/DDX21/TADA2A/SIRT5/CTR9/BMI…	105
medium	GO:0016236	macroautophagy	85/2299	350/21069	7.08161e-13	2.12979e-09	1.79351e-09	TMEM39A/SPG11/RB1CC1/OGT/TP53/STX12/VPS16/TMEM41B/STAM2/RUBCN/UBXN2A/STAM/ATP6V1A/SESN1/ARFIP2/PIP4K2C/AMBRA1/VPS36/MFN2/RAB23/TBC1D14/PAFAH1B2/EHMT2/ULK3/HUWE1/MAP1LC3A/PIP4K2B/GABARAPL2/ATP6V0A2/VPS41/CTSD/CDK5/CALCOCO2/NRBP2/POLDIP2/ATG3/PIK3CA/MTMR14/C9orf72/CAPN1/ATG4D/SNX4/WDR81/PSEN1/EPG5/LRSAM1/GNAI3/VDAC1/PHB2/HDAC6/ATP6V1C1/LGALS8/BAG3/DDRGK1/EXOC4/MTM1/ATP6V0D1/GBA1/CAPNS1/RIPK2/MAPK3/…	85
medium	GO:0006302	double-strand break repair	78/2299	315/21069	2.19106e-12	4.39307e-09	3.69942e-09	SIRT7/FEN1/NIPBL/PARP3/RNF169/PARP1/TP53/EPC1/PNKP/NSMCE1/YEATS4/ACTL6A/MSH2/SETD2/PHF10/CDC45/RAD52/FUS/XRCC6/PALB2/TRRAP/SMARCA2/OGG1/POLA1/ATRIP/PARP2/NSMCE2/KDM1A/RPA1/FAN1/XRCC3/SMARCB1/EXD2/DCLRE1C/SLF2/MMS19/PPP4C/POT1/MAD2L2/APTX/PRPF19/SMARCC2/PBRM1/RAD51C/MRNIP/TERF2IP/XRCC1/CDC7/ING3/TNKS1BP1/SMARCAD1/SMC5/EPC2/NABP1/SHLD2/SMARCA4/DCLRE1A/EP400/KLHL15/SMARCD2/RECQL/RTEL1/RMI1/CIB1/POGZ…	78
medium	GO:0031331	positive regulation of cellular catabolic process	105/2299	486/21069	4.03665e-12	6.07011e-09	5.11167e-09	TOB1/CSDE1/RB1CC1/DEPDC5/AKT2/SH3RF1/TUT7/TUT4/DCPS/FURIN/SESN1/MTDH/ZFP36L2/CNOT9/PIP4K2C/AMBRA1/PAN2/EXOSC9/ATF6/ARIH2/PIAS1/PAFAH1B2/ROCK2/PATL1/DHX36/SNX9/PIP4K2B/PTPN1/SYNCRIP/PIK3CB/CALCOCO2/RNF19B/ROCK1/PNPT1/SOCS5/TTC5/PTK2/SAMD4B/C9orf72/DVL1/DCP1A/SNX4/NT5C3B/PSEN1/EXOSC8/DIS3L2/IRS2/CNOT8/SNX33/TFEB/ENDOG/FTO/INSR/LRSAM1/GNAI3/VDAC1/BAX/BAG3/DDRGK1/DNAJB2/CHFR/GBA1/RAD23A/RIPK2/PDE12/B…	105
medium	GO:2001020	regulation of response to DNA damage stimulus	82/2299	351/21069	1.54237e-11	1.54623e-08	1.30209e-08	SIRT7/PARP3/RNF169/PARP1/TAF9B/TP53/EPC1/PNKP/NSMCE1/YEATS4/ACTL6A/CASP9/EEF1E1/SETD2/SMARCA5/CCDC117/PHF10/ARMT1/NEK4/RAD52/FXR2/FUS/POLH/PCNA/TRIM28/TRRAP/MIF/SMARCA2/OGG1/BCLAF1/TADA3/ATRIP/KDM1A/TAF5/SMARCB1/CRY1/TADA1/ATXN7/SLF2/RAD9A/ENDOG/FMR1/MMS19/PPP4C/POT1/MAD2L2/BID/INO80D/SMARCC2/PBRM1/MRNIP/TERF2IP/XRCC1/ING3/FAM168A/WDR76/PAXIP1/ABL1/EPC2/SHLD2/SMARCA4/ATXN7L3/DHX9/EP400/USP1/KLHL1…	82
medium	GO:1902459	positive regulation of stem cell population maintenance	24/2299	50/21069	5.16327e-11	4.43672e-08	3.73619e-08	ARID4B/OGT/SINHCAF/KDM2B/ACTL6A/RBBP7/PHF10/SAP30L/BICRA/NCOA3/SMARCA2/SIN3A/SMARCB1/SS18/HDAC2/HDAC1/BICRAL/SAP30/BRMS1/ARID4A/SMARCA4/SUDS3/ACTB/ING2	24
medium	GO:0098727	maintenance of cell number	55/2299	205/21069	1.54309e-10	9.87446e-08	8.31533e-08	ARID4B/MED27/HES1/NIPBL/OGT/SRRT/SINHCAF/SAV1/KDM2B/ACTL6A/TUT4/RBBP7/MED17/ZFP36L2/PHF10/SAP30L/BICRA/BCL9L/LRP5/NCOA3/SMARCA2/EIF4E/SIN3A/SMARCB1/SS18/MED14/HDAC2/DIS3L2/HDAC1/SMC3/KLF10/GNL3/BICRAL/CTR9/SAP30/CTNNB1/BRMS1/SMC1A/MED15/SMC5/ARID4A/SMARCA4/SUDS3/TRIM8/MED12/SELENON/NOTCH1/ACTB/MED30/ZHX2/KAT2A/FOXO1/RAF1/ZNF358/ING2	55
medium	GO:0000956	nuclear-transcribed mRNA catabolic process	45/2299	151/21069	1.74375e-10	9.87446e-08	8.31533e-08	SMG6/UPF2/TOB1/CSDE1/TUT7/SECISBP2/TUT4/DCPS/ZFP36L2/CNOT9/PAN2/EXOSC9/PATL1/DHX36/SYNCRIP/DHX34/EDC3/SKIC3/SAMD4B/DCP1A/XRN2/NT5C3B/EXOSC8/DIS3L2/CNOT8/GSPT2/EXOSC4/PDE12/BTG2/TNKS1BP1/CNOT6/CTIF/DHX9/DIS3/SMG1/TNRC6B/RC3H2/ZFP36L1/ZCCHC7/DCP1B/PNRC2/UPF3B/CNOT6L/POLR2D/EXOSC6	45
medium	GO:0015931	nucleobase-containing compound transport	62/2299	246/21069	1.8058e-10	9.87446e-08	8.31533e-08	NUP37/RANBP2/SLC25A19/SMG6/PARP11/UPF2/SLBP/THOC6/SLC35A2/SETD2/MCM3AP/SLC25A33/NOL6/CD47/SLC25A24/CKAP5/NRDE2/SLC35D1/SLC25A17/RIPK1/KPNB1/NUP93/NUP107/CPSF6/MVP/NUP98/PNPT1/SLC35B3/PHAX/RAE1/NUP88/SLC25A25/EPG5/FMR1/LRRC8A/XPO1/SLC35A1/FYTTD1/SRSF7/NUP58/SLC25A36/YTHDC1/NUP85/LRPPRC/NUP153/ABCC5/DHX9/TGFBR2/ABCD1/SMG1/NUP160/AGFG1/PCID2/ZFP36L1/XPOT/GLE1/THOC3/UPF3B/RSC1A1/SLC29A3/BICD2/POLR2D	62
medium	GO:0019827	stem cell population maintenance	54/2299	201/21069	2.13867e-10	9.89547e-08	8.33303e-08	ARID4B/MED27/HES1/NIPBL/OGT/SRRT/SINHCAF/SAV1/KDM2B/ACTL6A/TUT4/RBBP7/MED17/ZFP36L2/PHF10/SAP30L/BICRA/BCL9L/LRP5/NCOA3/SMARCA2/EIF4E/SIN3A/SMARCB1/SS18/MED14/HDAC2/DIS3L2/HDAC1/SMC3/KLF10/GNL3/BICRAL/CTR9/SAP30/CTNNB1/BRMS1/SMC1A/MED15/SMC5/ARID4A/SMARCA4/SUDS3/TRIM8/MED12/NOTCH1/ACTB/MED30/ZHX2/KAT2A/FOXO1/RAF1/ZNF358/ING2	54
medium	GO:0006260	DNA replication	72/2299	308/21069	2.5801e-10	1.10852e-07	9.33491e-08	SIRT7/FEN1/TIPIN/PARP1/TP53/BCL6/PNKP/ORC6/ACTL6A/RBBP7/SMARCA5/MGME1/CDK2/POLK/CDC45/BOD1L1/RBMS1/EHMT2/CDAN1/POLH/PCNA/CTC1/RFC5/TNFAIP1/POLA1/CHAF1A/PURA/POLI/TBRG1/RBBP6/RNASEH2A/RPA1/MCMBP/SIN3A/EXD2/WIZ/RFC3/WAPL/ENDOG/NFAT5/CENPS/SMC3/INO80D/RFC1/DDX21/LRWD1/ORC4/DSCC1/CDC7/ORC3/GMNN/ESCO1/PDS5A/POLD4/POLG2/RFC2/TTF1/PRIMPOL/DHX9/PPP2R1A/CHRAC1/SUPT16H/RECQL/RTEL1/RMI1/JADE2/RUVBL2/MCM7/OR…	72
medium	GO:0035264	multicellular organism growth	45/2299	153/21069	2.81371e-10	1.1283e-07	9.50144e-08	NIPBL/TP53/FXN/PTPN11/ERCC2/ATRN/PLEKHA1/RAI1/CREB1/EXT1/PALB2/TNS2/CTC1/BBS4/WWTR1/CCM2/PIK3CA/RBBP6/STAT5A/STAT5B/EZR/PEX5/SLC25A25/PLEC/SOCS2/RARA/FTO/BBS2/STK40/FLVCR1/PPIB/APP/ATN1/MBD5/RMI1/WDR11/CHD7/TBL1XR1/RC3H2/ZFP36L1/ERCC6/KAT2A/ZMPSTE24/ARID5B/WDTC1	45
medium	GO:0071375	cellular response to peptide hormone stimulus	74/2299	323/21069	3.88446e-10	1.46031e-07	1.22974e-07	PARP1/OGT/AKT2/PRKCI/LONP1/PTPN11/MEN1/INSIG2/PIK3R2/CAPN10/GAB1/SP1/DENND4C/JAK1/SLC25A33/PIP4K2C/GRB2/FOXO4/CRK/ROCK2/LEPROT/PIP4K2B/PTPN1/APPL1/TNS2/SLC2A8/SREBF1/ROCK1/PDK2/SLC9A1/LPIN3/PIK3CA/AGTRAP/STAT5A/ATP2B1/PTK2/STAT5B/RAB12/PTPN2/KANK1/PIK3R1/CFLAR/PTPRA/INPP5K/SRSF5/TYK2/BCAR1/SOCS2/IRS2/ECHDC3/INSR/LEPROTL1/RELA/NCOA5/CYFIP1/RAB13/EEF2K/PXN/NCK1/APC/BAIAP2/NFE2L2/MBD5/NFKB1/NCOA2/ZB…	74
medium	GO:0007033	vacuole organization	59/2299	235/21069	5.81097e-10	1.94183e-07	1.63523e-07	VPS33B/TMEM39A/SPG11/RB1CC1/STX12/TMEM165/VPS16/TMEM41B/UBXN2A/ATP6V1A/ARFIP2/PIP4K2C/AMBRA1/AP3B1/MFN2/RAB23/TBC1D14/EHMT2/FIG4/ULK3/MAP1LC3A/EXT1/PIP4K2B/GABARAPL2/CTSD/NAGPA/ATG3/C9orf72/ATG4D/SNX4/PSEN1/TFEB/LRSAM1/HEXA/BAG3/MTM1/HPS1/GBA1/TPP1/AKTIP/SMCR8/ATG13/ATG12/CLN5/ATP6V0B/ATP6V0A1/VIPAS39/ACP2/UBQLN2/PIK3C2B/PIK3C3/SNX18/SH3GLB1/RALB/CHMP4A/SNX30/PACS2/NAGLU/TMEM9	59
medium	GO:0006282	regulation of DNA repair	58/2299	230/21069	6.76259e-10	2.03385e-07	1.71271e-07	SIRT7/PARP3/RNF169/PARP1/EPC1/PNKP/YEATS4/ACTL6A/SETD2/CCDC117/PHF10/RAD52/FUS/POLH/PCNA/TRIM28/TRRAP/SMARCA2/OGG1/TADA3/ATRIP/KDM1A/TAF5/SMARCB1/TADA1/ATXN7/SLF2/MMS19/PPP4C/POT1/MAD2L2/INO80D/SMARCC2/PBRM1/MRNIP/TERF2IP/XRCC1/ING3/FAM168A/EPC2/SHLD2/SMARCA4/ATXN7L3/DHX9/EP400/USP1/KLHL15/SMARCD2/RTEL1/POGZ/TRIP12/RUVBL2/ACTB/BABAM2/MRGBP/ERCC6/KAT2A/MGMT	58
medium	GO:0098732	macromolecule deacylation	43/2299	157/21069	7.66202e-09	1.70693e-06	1.43741e-06	SIRT7/NIPBL/RRP8/TP53/BCL6/PER2/SIRT3/RCOR1/ABHD13/RBBP7/GATAD2A/SMARCA5/VEGFA/MIER1/FRY/ABHD17B/SREBF1/TADA3/DR1/MBIP/SIN3A/HDAC2/MTA2/HDAC1/HDAC6/CHD3/YEATS2/TADA2A/SIRT5/LYPLAL1/SMARCAD1/BRMS1/BAZ2A/SUDS3/ZBTB7B/TBL1XR1/HDAC7/SPRED1/MBD2/PRMT6/KAT2A/HDAC8/ING2	43
medium	GO:0006338	chromatin remodeling	84/2299	411/21069	9.13096e-09	1.82933e-06	1.54049e-06	RRP8/DNAJC9/SPTY2D1/YEATS4/ACTL6A/RBBP7/KAT6B/SETD2/GATAD2A/MCM3AP/ATF7IP/SMARCA5/KDM6A/MPHOSPH8/PHF10/KAT6A/CDK2/BICRA/MIER1/CHD6/MPND/TRIM28/SMARCA2/CHAF1A/DR1/PIK3CA/PPM1D/KDM1A/MORC2/SIN3A/SMARCB1/HAT1/LIN54/TSPYL1/SS18/HDAC2/MTA2/HDAC1/JARID2/CENPV/LMNB2/CHD3/INO80D/YEATS2/DDX21/TADA2A/SMARCC2/PBRM1/BICRAL/CFDP1/CTR9/NPM3/ANP32E/DAXX/SMARCAD1/L3MBTL3/BAZ2A/ZNF304/SMARCA4/TASOR/CHRAC1/RSF1/SU…	84
medium	GO:1903313	positive regulation of mRNA metabolic process	43/2299	158/21069	9.42795e-09	1.82933e-06	1.54049e-06	TOB1/CSDE1/TUT7/TUT4/DCPS/ZFP36L2/CNOT9/PAN2/EXOSC9/ROCK2/PATL1/DHX36/SYNCRIP/CIRBP/ROCK1/NUP98/PNPT1/TTC5/SAMD4B/NUDT21/DCP1A/PRMT5/NT5C3B/EXOSC8/DIS3L2/CNOT8/FTO/TRA2A/PRPF19/PDE12/BTG2/TNKS1BP1/CNOT6/DHX9/DIS3/TNRC6B/RC3H2/ZFP36L1/DCP1B/MEX3D/SNRNP70/CNOT6L/POLR2D	43
medium	GO:0043414	macromolecule methylation	79/2299	379/21069	1.01558e-08	1.90898e-06	1.60756e-06	SIRT7/ARID4B/RRP8/PARP1/ETFBKMT/OGT/NDUFAF7/TRMT6/PHF1/MEN1/FBL/KMT2B/SETD2/GATAD2A/ATF7IP/SMARCA5/THADA/KDM6A/VIRMA/MPHOSPH8/ARMT1/BOD1L1/PWP1/TRMT44/EHMT2/TRIM28/PRMT1/FAM98A/KMT2E/PIK3CA/MTRR/PPM1D/KDM1A/NFYA/SMARCB1/PCMT1/PRMT5/DIMT1/MTA2/KANSL1/JARID2/LCMT1/NOP2/PICK1/CTR9/BMI1/BTG2/SKIC8/CTNNB1/METTL1/CMTR1/PAXIP1/TET2/BAZ2A/ZNF304/KMT2A/SETD3/SUZ12/METTL9/ARID4A/RLF/TRDMT1/PRDM2/MTHFR/HCFC…	79
medium	GO:0046488	phosphatidylinositol metabolic process	46/2299	179/21069	2.04925e-08	3.2492e-06	2.73617e-06	INPP5E/PIK3R2/MTMR9/PIP4K2C/BPNT1/LPGAT1/FIG4/PI4K2B/PIP4K2B/PIK3CB/SOCS5/INPP5A/PIK3CA/MTMR14/PIGV/PIK3R1/INPP5K/IP6K1/PIGU/SOCS2/MTMR12/PIGS/PIGL/PI4KA/MTM1/MTMR10/MTMR4/BPNT2/MBOAT7/PIGT/MTMR2/PIGQ/PLCG1/OCRL/ITPKC/SH3YL1/SMG1/IP6K2/SOCS4/CISH/VAC14/INPP5B/PIK3C2B/PIK3C3/ITPKB/LCLAT1	46
medium	GO:0032868	response to insulin	63/2299	282/21069	2.13081e-08	3.28636e-06	2.76746e-06	PARP1/OGT/AKT2/PRKCI/LONP1/PTPN11/INSIG2/PIK3R2/CAPN10/GAB1/SP1/DENND4C/KBTBD2/SLC25A33/PIP4K2C/GRB2/FOXO4/PIP4K2B/PTPN1/APPL1/TNS2/SLC2A8/SREBF1/PDK2/SLC9A1/LPIN3/PIK3CA/ATP2B1/CRY1/RAB12/PTPN2/KANK1/PIK3R1/CFLAR/EIF6/PTPRA/INPP5K/SRSF5/BCAR1/IRS2/ECHDC3/INSR/NCOA5/SCAP/CYFIP1/RAB13/EEF2K/NCK1/APC/BAIAP2/NCOA2/CRY2/ZBTB7B/EPM2AIP1/PHIP/ZFP36L1/RAB8A/VPS13C/FOXO1/RAB31/GSK3B/WDTC1/EIF4EBP2	63
medium	GO:0032259	methylation	84/2299	422/21069	3.20373e-08	4.58819e-06	3.86374e-06	SIRT7/ARID4B/RRP8/PARP1/ETFBKMT/OGT/NDUFAF7/TRMT6/PHF1/MEN1/FBL/KMT2B/SETD2/GATAD2A/ATF7IP/SMARCA5/THADA/KDM6A/VIRMA/MPHOSPH8/ARMT1/BOD1L1/PWP1/TRMT44/EHMT2/TRIM28/METTL17/PRMT1/FAM98A/KMT2E/PIK3CA/MTRR/PPM1D/KDM1A/SMYD4/NFYA/SMARCB1/PCMT1/PRMT5/DIMT1/MTA2/KANSL1/JARID2/COMTD1/LCMT1/NOP2/PICK1/CTR9/BMI1/BTG2/SKIC8/CTNNB1/METTL1/CMTR1/PAXIP1/TET2/METTL13/BAZ2A/ZNF304/KMT2A/SETD3/SUZ12/METTL9/ARID4…	84
medium	GO:0034976	response to endoplasmic reticulum stress	64/2299	295/21069	5.32873e-08	7.12274e-06	5.9981e-06	EIF2AK3/TP53/PPP1R15A/DNAJC18/PIK3R2/HSP90B1/JKAMP/NGLY1/JUN/UBXN8/DNAJB14/SYVN1/ATF6/P4HB/PTPN1/ECPAS/TMTC4/STT3B/ERLIN1/HSPA5/ERLEC1/TMTC3/MAP3K5/TRIM25/HYOU1/TRAF2/PTPN2/PIK3R1/TMX1/TMUB1/FICD/DNAJC3/EDEM1/PPP1R15B/LPCAT3/BAX/DDRGK1/DNAJB2/EIF2AK4/HERPUD2/ERO1A/CREB3L2/PDIA4/PDIA3/ERLIN2/ABL1/NCK1/TMBIM6/USP19/NFE2L2/EDEM3/OPA1/BAG6/YOD1/RNF139/BCAP31/UBQLN2/SEC16A/RHBDD1/GET4/DDIT3/MANF/DNAJB…	64
medium	GO:0006984	ER-nucleus signaling pathway	20/2299	50/21069	9.69323e-08	1.24053e-05	1.04465e-05	EIF2AK3/ARHGEF10L/TP53/PPP1R15A/INSIG2/ATF6/PTPN1/ERLIN1/HSPA5/SREBF1/PTPN2/PPP1R15B/LPCAT3/SCAP/ERLIN2/NCK1/NFE2L2/ZBTB7B/DDIT3/GSK3B	20
medium	GO:0016311	dephosphorylation	80/2299	406/21069	1.06125e-07	1.32988e-05	1.1199e-05	PDP1/SMG6/PPP2R5A/PPP1R15A/INPP5E/DUSP10/SEMA4D/SWAP70/PTPN11/PPM1M/HSP90B1/MTMR9/PTPN12/BPNT1/AMBRA1/BOD1L1/DUSP23/RPRD1A/FIG4/ROCK2/PTPN1/TNS2/PPM1F/BTRC/IKBKB/ROCK1/UBLCP1/INPP5A/PPM1D/TNS3/MTMR14/PPP4R1/PLPP1/PTPN2/PPP3R1/LHPP/PTPRA/INPP5K/NT5C/MTMR12/PPP4C/PPP1R15B/BAG4/MTM1/MTMR10/GBA1/MTMR4/CTDSPL2/BPNT2/PDPR/CTDSP2/MTMR2/SLC39A10/YWHAB/PTPN9/DUSP18/GNA12/OCRL/NCK1/PTPMT1/PPM1G/PPP2R5E/PPP…	80
medium	GO:0006403	RNA localization	52/2299	227/21069	1.5256e-07	1.73141e-05	1.45803e-05	NUP37/RANBP2/SMG6/PARP11/UPF2/SLBP/THOC6/FBL/SETD2/MCM3AP/NOL6/CKAP5/NRDE2/DHX36/CCT3/KPNB1/NUP93/NUP107/CPSF6/MVP/NUP98/PNPT1/PHAX/RAE1/NUP88/FMR1/XPO1/FYTTD1/SRSF7/NUP58/YTHDC1/NUP85/LRPPRC/NUP153/CCT2/DHX9/TGFBR2/SMG1/ZNHIT6/NUP160/AGFG1/PCID2/RUVBL2/ZFP36L1/XPOT/GLE1/TERF1/THOC3/UPF3B/MEX3D/BICD2/POLR2D	52
medium	GO:0000723	telomere maintenance	44/2299	179/21069	1.65233e-07	1.80705e-05	1.52172e-05	FEN1/SMG6/PINX1/PARP3/GAR1/PARP1/PNKP/NSMCE1/ACTL6A/PCNA/XRCC6/DHX36/CCT3/CTC1/YLPM1/NSMCE2/RPA1/XRCC3/DCLRE1C/TPRKB/SLF2/POT1/MAD2L2/INO80D/RFC1/GNL3/RAD51C/TERF2IP/MAPK3/XRCC1/CTNNB1/TNKS1BP1/ZBTB48/NAT10/SMC5/ACD/CCT2/SHLD2/DCLRE1A/SMG1/RTEL1/RUVBL2/TERF1/HDAC8	44
medium	GO:0006352	DNA-templated transcription initiation	40/2299	159/21069	3.08138e-07	2.89601e-05	2.43875e-05	BDP1/MED27/TAF9B/TP53/ATF7IP/SMARCA5/MED17/JUN/GTF3C4/MED26/GTF3C1/DHX36/TAF1B/BCLAF1/MED10/MED25/DR1/PPM1D/TAF5/CAND1/SMARCB1/MED13/MED14/POLR1E/GTF2E2/BRF1/SRF/PAXIP1/BAZ2A/MED15/TAF1C/SMARCA4/RSF1/MED12/SUB1/MED30/ERCC6/TAF13/POLR2D/MED31	40
medium	GO:0051168	nuclear export	44/2299	184/21069	3.80149e-07	3.31391e-05	2.79066e-05	SIRT7/RANBP2/SMG6/UPF2/THOC6/PTPN11/SETD2/MCM3AP/LZTS2/NOL6/XPO4/NRDE2/NUP93/NUP107/CPSF6/CDK5/PHAX/RAE1/EIF6/HSPA9/NUP88/RITA1/UHMK1/XPO1/BAG3/FYTTD1/CTDSPL2/YTHDC1/NUP85/NUP153/DHX9/SMG1/NUP160/AGFG1/TCF7L2/PCID2/XPOT/GLE1/WASHC4/THOC3/STYX/DESI1/GSK3B/POLR2D	44
medium	GO:0001701	in utero embryonic development	81/2299	428/21069	5.09858e-07	4.20109e-05	3.53776e-05	SP3/SLC25A20/PLOD3/HES1/TP53/OTUD7B/ERCC2/ACTL6A/MSH2/FURIN/SETD2/MBNL1/GRB2/MFN2/VEGFA/ADAM10/EIF2S2/GPI/PALB2/TRIM28/LPAR6/PRMT1/MIB1/KIDINS220/CCM2/VASH1/ZFAND5/RBBP6/SIN3A/SMARCB1/BYSL/NPAT/CITED2/SLC39A1/INPP5K/PCGF2/ACVR1/TFEB/ENDOG/SRF/CMIP/ACVR1B/LATS2/KIFBP/CPT2/HINFP/RUNDC1/CTR9/YTHDC1/BMI1/ITGB1/FLVCR1/UNK/CTNNB1/ADCY9/SLC39A3/GNA12/TGFBR1/OCRL/POLG2/TASOR/FUT8/TGFBR2/CHD8/ZNF568/CHD7/…	81
medium	GO:0071559	response to transforming growth factor beta	60/2299	290/21069	7.57812e-07	5.76992e-05	4.85888e-05	ARID4B/HYAL2/GIPC1/PARP1/OGT/TP53/ADAM17/SINHCAF/SPRY2/TWSG1/MEN1/RBBP7/FURIN/ZFP36L2/SAP30L/JUN/BCL9L/CRK/ROCK2/USP9X/APPL1/HSPA5/ROCK1/LDLRAD4/PTK2/SIN3A/SNX25/USP15/LIMS1/CFLAR/CITED2/HDAC2/ACVR1/HDAC1/ZNF703/RNF111/ZFYVE9/LATS2/NLK/MTMR4/SAP30/ID1/ADAM9/BRMS1/ZYX/ABL1/TGFBR1/PXN/ARID4A/NR3C1/SUDS3/FUT8/TGFBR2/ZEB1/ZFP36L1/SPRED1/LEMD3/SMAD2/ING2/PMEPA1	60
medium	GO:0031647	regulation of protein stability	72/2299	373/21069	1.01355e-06	7.34515e-05	6.18539e-05	PINX1/GIPC1/TAF9B/CDKN2AIP/TP53/STX12/SAV1/CTNND1/ATF7IP/RPL23/MTMR9/MYLIP/DAZAP2/SYVN1/BAG2/NEDD4L/CREB1/DDOST/USP9X/GLMP/CCT3/BTRC/TRIM39/SREBF1/TADA3/USP3/MFSD1/TBRG1/KRAS/GNAQ/LAMP1/WIZ/DVL1/PFDN6/PIK3R1/WDR81/MORC3/USP4/CREBL2/NR1D1/B4GALT5/PHB2/BAG4/HDAC6/GET1/BAG3/DDRGK1/APTX/CHFR/NLK/RAD23A/PPIB/OTUD3/VBP1/P3H1/RPAP3/USP19/CCT2/CMTM6/KDM8/BAG6/RNF139/USP33/NOP53/RUVBL2/SEC16A/GET4/STK3/SH…	72
medium	GO:0007179	transforming growth factor beta receptor signaling pathway	50/2299	228/21069	1.05326e-06	7.54211e-05	6.35125e-05	ARID4B/GIPC1/PARP1/OGT/TP53/ADAM17/SINHCAF/SPRY2/TWSG1/MEN1/RBBP7/FURIN/SAP30L/JUN/BCL9L/USP9X/APPL1/HSPA5/LDLRAD4/PTK2/SIN3A/SNX25/USP15/CITED2/HDAC2/ACVR1/HDAC1/ZNF703/RNF111/ZFYVE9/LATS2/NLK/MTMR4/SAP30/ID1/ADAM9/BRMS1/ZYX/TGFBR1/PXN/ARID4A/SUDS3/FUT8/TGFBR2/ZEB1/SPRED1/LEMD3/SMAD2/ING2/PMEPA1	50
medium	GO:0045814	negative regulation of gene expression, epigenetic	29/2299	103/21069	1.08496e-06	7.67769e-05	6.46542e-05	RRP8/EPC1/SPTY2D1/ATF7IP/SMARCA5/MPHOSPH8/CDK2/TRIM28/PIK3CA/PPM1D/KDM1A/MORC2/SIN3A/HAT1/HDAC1/CENPV/LMNB2/CTR9/BMI1/L3MBTL3/BAZ2A/ZNF304/TASOR2/TASOR/DNMT3A/EZH1/MBD2/ZNF445/FAM172A	29
medium	GO:0031507	heterochromatin formation	26/2299	87/21069	1.11318e-06	7.78577e-05	6.55644e-05	RRP8/SPTY2D1/ATF7IP/SMARCA5/MPHOSPH8/CDK2/TRIM28/PIK3CA/PPM1D/KDM1A/MORC2/SIN3A/HAT1/HDAC1/CENPV/LMNB2/CTR9/L3MBTL3/BAZ2A/ZNF304/TASOR/DNMT3A/EZH1/MBD2/ZNF445/FAM172A	26
medium	GO:0033044	regulation of chromosome organization	59/2299	287/21069	1.16353e-06	8.04443e-05	6.77425e-05	FEN1/SMG6/PINX1/PARP1/PNKP/NSMCE1/ACTL6A/ANAPC5/ATF7IP/SMARCA5/MPHOSPH8/PHF10/CDK2/DHX36/CCT3/TRIM28/CTC1/SMARCA2/YLPM1/NSMCE2/MAD2L1BP/MORC2/XRCC3/SIN3A/SMARCB1/SLF2/WAPL/LCMT1/POT1/CENPV/MAD2L2/CHFR/INO80D/GNL3/SMARCC2/NCAPD2/PBRM1/TERF2IP/MAPK3/XRCC1/CTNNB1/NAT10/ZNF304/SMC5/APC/ACD/CCT2/SMARCA4/NEK6/TASOR/KLHL22/SMG1/SMARCD2/RTEL1/PCID2/RUVBL2/ACTB/TERF1/HDAC8	59
medium	GO:0035966	response to topologically incorrect protein	45/2299	198/21069	1.28392e-06	8.77591e-05	7.39024e-05	EIF2AK3/PPP1R15A/DNAJC18/JKAMP/NGLY1/DNAJB14/ATF6/MFN2/PTPN1/TM7SF3/TMTC4/STT3B/TRAM1/HSPA5/ERLEC1/PTPN2/PIK3R1/HSPA9/FICD/DNAJC3/EDEM1/HSPA13/PPP1R15B/HDAC6/BAX/BAG3/DDRGK1/DNAJB2/HERPUD2/HSPA4/ERO1A/CREB3L2/DAXX/NCK1/TMBIM6/NFE2L2/EDEM3/BAG6/YOD1/KLHL15/DNAJB4/RHBDD1/DDIT3/MANF/DNAJB9	45
medium	GO:0019318	hexose metabolic process	52/2299	243/21069	1.41616e-06	9.57104e-05	8.05982e-05	SIRT7/RANBP2/PGK1/OGT/TP53/AKT2/ADPGK/PER2/SLC35A2/KBTBD2/PMM1/GALK2/MLYCD/GDPGP1/FUOM/PGM2/MPI/LRP5/GPI/DYRK2/MAN2C1/POFUT2/FAM3C/PDK2/HECTD4/PIK3CA/CRY1/PTPN2/IRS2/HK1/INSR/FAM3A/LCMT1/ENO1/BRAT1/GALT/G6PC3/PDK1/NLN/DGKQ/PPARD/NR3C1/G6PD/FUT8/NCOA2/EPM2AIP1/FUCA1/FUT4/KAT2A/FOXO1/ZMPSTE24/WDTC1	52
medium	GO:0009314	response to radiation	89/2299	496/21069	1.53266e-06	0.000102433	8.62593e-05	FEN1/TIPIN/RBM4B/HYAL1/HYAL2/NIPBL/PARP1/TP53/AKT2/PNKP/PER2/ERCC2/MEN1/CASP9/MSH2/IMPACT/POLK/TANC1/GRB2/POLH/CEP250/PCNA/XRCC6/DYNLRB1/DHX36/EXT1/TANK/XPC/CIRBP/NET1/HSPA5/CDK5/OGG1/HMGCR/NPTN/PPM1D/KDM1A/KRAS/GNAQ/CRY1/DCLRE1C/CRTC1/PIK3R1/NR2F6/RAD9A/BAX/RELA/EIF2AK4/BRAT1/EEF1D/TP53I13/MRNIP/KARS1/TLK2/ITGB1/MAP4K3/TNKS1BP1/PAXIP1/APP/SMC1A/KMT2A/TMEM109/CUL4B/NABP1/PRIMPOL/CCDC66/N4BP1/USP1…	89
medium	GO:0009226	nucleotide-sugar biosynthetic process	11/2299	20/21069	1.67501e-06	0.000108659	9.15022e-05	GNPDA2/PGM3/AMDHD2/PMM1/UXS1/MPI/GNPDA1/UAP1/NANS/GMPPB/GFUS	11
medium	GO:1902903	regulation of supramolecular fiber organization	80/2299	434/21069	1.76192e-06	0.000112744	9.49424e-05	EPS8/ARHGEF10L/SWAP70/ARL2/PIK3R2/ADD3/ARFIP2/CD47/MAPRE1/PLEKHG2/CAPZA2/CKAP5/GRB2/DCTN1/ARPC3/ROCK2/CAMSAP1/CTTN/SNX9/PPM1F/AKAP9/BBS4/MTPN/CAMSAP2/ROCK1/SLC9A1/PIK3CA/EVL/RASA1/C9orf72/PFDN6/KANK1/PIK3R1/ATXN7/TESK1/INPP5K/PSEN1/ASAP3/COLGALT1/BAG4/HDAC6/WDR1/CAPZA1/RHOC/SORBS3/PICK1/ARPC5L/SPTAN1/ARHGAP18/ID1/CLIP1/CYFIP1/VBP1/DBNL/APP/ABL1/TGFBR1/PXN/WASF2/NCK1/APC/BAIAP2/FCHSD2/CLASP1/DAPK3…	80
medium	GO:0006457	protein folding	52/2299	247/21069	2.3606e-06	0.000144888	0.000122011	RANBP2/MOGS/ARL2/DNAJC18/NKTR/DNAJB11/HSP90B1/NGLY1/NUDC/DNAJB14/ATF6/BAG2/P4HB/PRDX4/ENGASE/CCT3/LMAN1/HSPA5/POFUT2/CLPX/HYOU1/AIP/PEX5/PFDN6/HSPA9/DNAJC3/HSPA13/BAG4/TOR2A/BAG3/TBCE/DNAJB2/DNAJC21/HSPA4/ERO1A/DNAJC5/ANP32E/PPIB/PDIA4/PDIA3/VBP1/P3H1/TBCEL/CCT2/TXNDC5/DNAJB4/RUVBL2/DNAJC25/DNAJC1/SIL1/ALG12/SNRNP70	52
medium	GO:0032386	regulation of intracellular transport	68/2299	354/21069	2.39116e-06	0.000145281	0.000122342	SIRT7/HYAL2/LDLRAP1/AKT2/PTPN11/PIK3R2/TCAF1/SAE1/CAPN10/SETD2/DNAJC13/XPO4/TMEM30A/RAB23/NRDE2/ARIH2/STX18/LEPROT/HUWE1/TRIM28/PTPN1/ERGIC3/LMAN1/CPSF6/CDK5/GRIPAP1/SREBF1/FIS1/ERLEC1/DENND10/RIPOR1/BORCS5/LAMP1/EZR/SEC24B/PIK3R1/INPP5K/PSEN1/UHMK1/REEP5/EDEM1/BAG4/XPO1/BAG3/CSNK2A2/NUP58/CTDSPL2/MAPK3/ARHGAP1/MTMR2/B3GAT3/NUP153/ATG13/DHX9/YOD1/RNF139/BCAP31/SAR1B/CIB1/TCF7L2/ARV1/SH3GLB1/PDCD1…	68
medium	GO:0140014	mitotic nuclear division	68/2299	357/21069	3.24105e-06	0.000187648	0.000158019	SIRT7/CCSAP/EPS8/PINX1/NIPBL/ACTL6A/ANAPC5/KIF3B/SMARCA5/RCC1/MAPRE1/PHF10/NUDC/LRP5/KPNB1/RANBP1/SMARCA2/POLDIP2/STAG2/UBE2S/NSMCE2/MAD2L1BP/XRCC3/SMARCB1/PRMT5/EML4/NSL1/DIS3L2/SLF2/NCAPH2/INSR/CUL7/PHB2/LCMT1/MAD2L2/CEP97/SMC3/SPICE1/SMARCC2/NCAPD2/PBRM1/DSCC1/WRAP73/NDE1/ESCO1/SMC1A/PDS5A/SMC5/APC/SH2B1/SMARCA4/NEK6/TASOR/REEP3/CLASP1/PPP2R1A/CUL9/USP16/KLHL22/DAPK3/SMARCD2/POGZ/SPAST/PCID2/P…	68
medium	GO:0032200	telomere organization	46/2299	211/21069	3.30715e-06	0.000189452	0.000159539	FEN1/SMG6/PINX1/PARP3/GAR1/PARP1/PNKP/NSMCE1/ACTL6A/PCNA/XRCC6/DHX36/CCT3/CTC1/YLPM1/NSMCE2/RPA1/XRCC3/HAT1/DCLRE1C/TPRKB/SLF2/POT1/MAD2L2/INO80D/RFC1/GNL3/RAD51C/TERF2IP/MAPK3/XRCC1/CTNNB1/TNKS1BP1/ZBTB48/NAT10/SMC5/ACD/CCT2/SHLD2/DCLRE1A/SMG1/RTEL1/EZH1/RUVBL2/TERF1/HDAC8	46
medium	GO:0009225	nucleotide-sugar metabolic process	15/2299	38/21069	4.72463e-06	0.000251493	0.000211783	UGP2/GNPDA2/PGM3/AMDHD2/GNE/PMM1/UXS1/MPI/GNPDA1/UAP1/GALT/NANS/FUT8/GMPPB/GFUS	15
medium	GO:0072594	establishment of protein localization to organelle	85/2299	482/21069	5.28708e-06	0.000276538	0.000232874	RANBP2/SPG11/HYAL2/NIPBL/TP53/PEX3/STAM2/PIK3R2/STAM/SAE1/PITRM1/RPL23/VPS36/AP3B1/MFN2/RAB23/ARIH2/LEPROT/HUWE1/CCT3/TRIM28/KPNB1/NUP93/APPL1/LMAN1/PMPCB/NUP107/VPS41/TRAM1/HSPA5/SREBF1/NAGPA/FIS1/TNPO1/NUP98/TOMM40L/LAMP1/AIP/PEX5/PPP3R1/PIK3R1/NUP88/PSEN1/TNPO2/HK1/LRSAM1/EDEM1/PHB2/BAG4/POT1/BAX/BAG3/CSNK2A2/BID/LRWD1/MTX1/NUP58/HSPA4/NUP85/NUP153/ATG13/KPNA4/TSPAN17/TSPO/ACD/CCT2/SNX16/BAG6/…	85
medium	GO:0140718	facultative heterochromatin formation	14/2299	34/21069	5.44308e-06	0.000282242	0.000237678	RRP8/ATF7IP/SMARCA5/MPHOSPH8/TRIM28/KDM1A/MORC2/HDAC1/L3MBTL3/BAZ2A/ZNF304/TASOR/DNMT3A/MBD2	14
medium	GO:0120261	regulation of heterochromatin organization	13/2299	30/21069	5.98445e-06	0.000305055	0.000256888	ATF7IP/MPHOSPH8/CDK2/TRIM28/PIK3CA/KDM1A/MORC2/SIN3A/CTR9/L3MBTL3/ZNF304/TASOR/ZNF445	13
medium	GO:0110053	regulation of actin filament organization	59/2299	302/21069	6.31536e-06	0.000316557	0.000266575	EPS8/ARHGEF10L/SWAP70/PIK3R2/ADD3/ARFIP2/CD47/PLEKHG2/CAPZA2/GRB2/ARPC3/ROCK2/CTTN/SNX9/PPM1F/BBS4/MTPN/ROCK1/SLC9A1/PIK3CA/EVL/RASA1/C9orf72/KANK1/PIK3R1/TESK1/INPP5K/ASAP3/BAG4/WDR1/CAPZA1/RHOC/SORBS3/PICK1/ARPC5L/SPTAN1/ARHGAP18/ID1/CYFIP1/DBNL/ABL1/TGFBR1/PXN/WASF2/NCK1/BAIAP2/FCHSD2/CLASP1/TWF1/ADD1/ARPIN/CDC42EP1/SSH3/FHOD1/WASHC4/ARPC5/ARF6/C15orf62/CDC42EP4	59
medium	GO:0090503	RNA phosphodiester bond hydrolysis, exonucleolytic	16/2299	44/21069	8.01944e-06	0.000385896	0.000324965	DCPS/ANGEL2/PAN2/EXOSC9/REXO2/PNPT1/EXD2/XRN2/EXOSC8/DIS3L2/CNOT8/EXOSC4/PDE12/CNOT6/DIS3/CNOT6L	16
medium	GO:0061136	regulation of proteasomal protein catabolic process	47/2299	225/21069	8.788e-06	0.000419522	0.000353282	GIPC1/OGT/SH3RF1/CDK2/BAG2/ARIH2/PIAS1/USP9X/GABARAPL2/BTRC/TRIM39/RNF19B/SOCS5/TMTC3/DVL1/PSEN1/FMR1/HFE/XPO1/OSBPL7/DDRGK1/DNAJB2/CHFR/MTM1/GBA1/RAD23A/TMF1/TLK2/RNF19A/GNA12/USP19/NFE2L2/BAG6/N4BP1/BCAP31/NOP53/PSME1/UBQLN2/SOCS4/TRIB1/RNF217/ANKIB1/STYX/CSNK1E/DESI1/GSK3B/GPX1	47
medium	GO:0006275	regulation of DNA replication	36/2299	156/21069	9.91217e-06	0.000463096	0.000389976	TIPIN/TP53/BCL6/ACTL6A/SMARCA5/CDK2/EHMT2/CDAN1/PCNA/CTC1/RFC5/TNFAIP1/RBBP6/WIZ/RFC3/WAPL/ENDOG/SMC3/INO80D/DSCC1/CDC7/ORC3/GMNN/ESCO1/PDS5A/POLG2/RFC2/TTF1/DHX9/PPP2R1A/CHRAC1/JADE2/RUVBL2/MCM7/TERF1/ZMPSTE24	36
medium	GO:0000422	autophagy of mitochondrion	26/2299	97/21069	1.02381e-05	0.000463096	0.000389976	RB1CC1/OGT/TP53/ARFIP2/AMBRA1/MFN2/FBXL4/CTTN/HUWE1/MAP1LC3A/GABARAPL2/SREBF1/FIS1/ATG3/ATG4D/VDAC1/PHB2/HDAC6/CSNK2A2/GBA1/ATG13/ATG12/TSPO/RNF41/VPS13C/SNX30	26
medium	GO:0061726	mitochondrion disassembly	26/2299	97/21069	1.02381e-05	0.000463096	0.000389976	RB1CC1/OGT/TP53/ARFIP2/AMBRA1/MFN2/FBXL4/CTTN/HUWE1/MAP1LC3A/GABARAPL2/SREBF1/FIS1/ATG3/ATG4D/VDAC1/PHB2/HDAC6/CSNK2A2/GBA1/ATG13/ATG12/TSPO/RNF41/VPS13C/SNX30	26
medium	GO:0048193	Golgi vesicle transport	62/2299	328/21069	1.10741e-05	0.000497096	0.000418607	GOLT1B/ATP9B/PRKCI/KDELR1/LLGL1/TBC1D14/SNAP23/STX18/GABARAPL2/ERGIC3/LMAN1/AP1G2/CYTH3/TRAPPC11/SEC23IP/TMED6/NRBP2/KDELR2/CCDC93/LAMP1/HYOU1/PEF1/SEC24B/TMED1/USE1/CEP19/TRAPPC9/EXOC4/SEC22A/BBS2/PICK1/SCAP/CREB3L2/ERGIC1/GOSR2/TAPBP/TRAPPC13/COPG2/ACSL3/RAB13/VAMP5/SEC23B/MIA3/TMED5/GOLPH3L/RNF139/STX6/SEC31A/BCAP31/EXOC6B/EXOC6/SAR1B/SPAST/SEC16A/SNX2/YIF1B/EXOC1/RAB8A/VPS13C/RSC1A1/RAB31/BIC…	62
medium	GO:0043254	regulation of protein-containing complex assembly	79/2299	454/21069	1.83425e-05	0.000766183	0.000645206	EPS8/HES1/PARP1/TP53/VPS16/PTPN11/ARL2/PIK3R2/IMPACT/ASAP1/ATF7IP/ADD3/MAPRE1/PLEKHG2/CAPZA2/AMBRA1/CKAP5/GRB2/DCTN1/VEGFA/ARPC3/CAMSAP1/CTTN/SNX9/ATAT1/VPS41/AKAP9/BBS4/HSPA5/MTPN/CAMSAP2/MED25/LDLRAD4/EVL/RASA1/CAND1/PEX5/TRAF2/KANK1/FNIP2/SLF2/BAG4/LCMT1/HDAC6/BAX/BID/CAPZA1/RHOC/GBA1/ARPC5L/SPTAN1/ARHGAP18/CLIP1/CYFIP1/DBNL/ABL1/NCK1/BAIAP2/FCHSD2/CLASP1/TWF1/STXBP5/ADD1/NOP53/SAR1B/SLAIN2/FN…	79
medium	GO:0032922	circadian regulation of gene expression	21/2299	73/21069	2.23257e-05	0.000907359	0.000764091	RBM4B/OGT/PER2/LGR4/RAI1/HUWE1/CRY1/PRMT5/HDAC2/NR1D1/HDAC1/BMAL1/NAMPT/ID1/KMT2A/KDM8/NCOA2/ID2/CRY2/NUDT12/CSNK1E	21
medium	GO:0032984	protein-containing complex disassembly	51/2299	261/21069	2.58658e-05	0.00103035	0.000867664	CCSAP/DDIT4/TMEM39A/EPS8/VPS16/RUBCN/SWAP70/KIF5B/RPL23/ADD3/CAPZA2/CKAP5/NCKAP5L/SH3GL1/CAMSAP1/MAP1LC3A/MTPN/CALCOCO2/CAMSAP2/PIK3CA/SMARCB1/ATXN7/APEH/EPG5/INSR/HDAC6/GSPT2/WDR1/CAPZA1/SMARCC2/GBA1/SPTAN1/GFM2/SMCR8/ATG12/APC/SCAF4/SMARCA4/CLASP1/SUPT16H/TWF1/SMARCD2/ADD1/CIB1/SPAST/VAMP8/PIK3C3/GLE1/CHMP4A/ZMPSTE24/GSK3B	51
medium	GO:0061842	microtubule organizing center localization	13/2299	34/21069	3.04668e-05	0.00118998	0.00100209	RANBP2/DYNC1LI2/KIF5B/TBCCD1/SUN2/AKAP9/EZR/INTS13/NDE1/FHOD1/ARPC5/SUN1/BICD2	13
medium	GO:0036499	PERK-mediated unfolded protein response	9/2299	18/21069	4.17938e-05	0.00156143	0.00131489	EIF2AK3/PPP1R15A/PTPN1/HSPA5/PTPN2/PPP1R15B/NCK1/NFE2L2/DDIT3	9
medium	GO:0042176	regulation of protein catabolic process	72/2299	415/21069	4.66016e-05	0.0017092	0.00143932	GIPC1/OGT/SH3RF1/CYP51A1/UBXN2A/FURIN/CDK2/MYLIP/BAG2/ARIH2/PIAS1/USP9X/SNX9/GABARAPL2/BTRC/TRIM39/HMGCR/RNF19B/FBXL20/ROCK1/LRIG2/SOCS5/TMTC3/EZR/DVL1/PSEN1/TIPARP/SNX33/FMR1/HFE/XPO1/MAD2L2/OSBPL7/DDRGK1/DNAJB2/RELA/CHFR/MTM1/GBA1/RAD23A/TMF1/TLK2/ADAM9/RNF19A/GNA12/WDR91/CUL4B/VGLL4/APC/USP19/NFE2L2/BAG6/N4BP1/BCAP31/NOP53/FBXL5/PSME1/UBQLN2/SOCS4/TRIB1/RNF41/RNF217/ANKIB1/FOXO1/STYX/CSNK1E/DE…	72
medium	GO:0033157	regulation of intracellular protein transport	47/2299	240/21069	4.96815e-05	0.00180665	0.00152139	SIRT7/HYAL2/AKT2/PTPN11/PIK3R2/TCAF1/SAE1/XPO4/TMEM30A/RAB23/ARIH2/LEPROT/HUWE1/TRIM28/PTPN1/ERGIC3/LMAN1/CDK5/GRIPAP1/SREBF1/FIS1/ERLEC1/RIPOR1/PIK3R1/INPP5K/PSEN1/UHMK1/EDEM1/BAG4/XPO1/BAG3/CSNK2A2/NUP58/CTDSPL2/B3GAT3/ATG13/YOD1/BCAP31/SAR1B/CIB1/TCF7L2/SH3GLB1/PDCD10/STOM/BAP1/HRAS/GSK3B	47
medium	GO:2001233	regulation of apoptotic signaling pathway	72/2299	416/21069	5.046e-05	0.00180665	0.00152139	EIF2AK3/HYAL2/PARP1/RB1CC1/TAF9B/TP53/FXN/SH3RF1/RNF34/EEF1E1/TMBIM1/PRELID1/SYVN1/DEDD2/P4HB/CTTN/RIPK1/PTPN1/BCL2L12/PIK3CB/MIF/TRIM39/BCLAF1/GCLM/FIS1/KDM1A/HYOU1/TRAF2/PTPN2/CFLAR/PCGF2/PSEN1/ACVR1/PRDX2/RAD9A/HDAC1/GNAI3/SGK3/BAX/ENO1/RFFL/CSNK2A2/BCL10/RELA/BID/CTNNA1/BMI1/CTNNB1/RBCK1/PDIA3/TGFBR1/CASP2/NCK1/PTPMT1/TMBIM6/NFE2L2/OPA1/BCL2L2/PPP2R1A/PPP2R1B/BCAP31/TCF7L2/PTTG1IP/PHIP/STK3/B…	72
medium	GO:0051098	regulation of binding	71/2299	410/21069	5.57174e-05	0.00197141	0.00166014	LRPAP1/PINX1/HES1/PARP1/LDLRAP1/PER2/ERCC2/MEN1/CTBP2/ZC4H2/MAPRE1/JUN/DAZAP2/PBXIP1/NME1/BAG2/CRK/USP9X/TRIM28/ZFP90/CDK5/POLDIP2/ROCK1/MED25/KDM1A/ZNF593/SIN3A/C9orf72/DVL1/PSEN1/HDAC2/WAPL/RAPGEF2/RARA/FMR1/HFE/MAD2L2/BAX/DDRGK1/DNAJB2/RIPK2/MAPK3/ID1/AKTIP/CTNNB1/GMNN/APP/ZNF304/ABL1/TGFBR1/TMBIM6/CLN5/ACD/DHX9/RSF1/USP33/ADD1/TCF7L2/ACTB/STK3/DDIT3/RALB/TFAP4/ILRUN/MBD2/SMAD2/ZMPSTE24/STYX/C…	71
medium	GO:0035967	cellular response to topologically incorrect protein	34/2299	156/21069	6.01104e-05	0.00211441	0.00178056	EIF2AK3/PPP1R15A/DNAJC18/NGLY1/DNAJB14/ATF6/PTPN1/TM7SF3/TMTC4/HSPA5/ERLEC1/PTPN2/PIK3R1/HSPA9/FICD/HSPA13/PPP1R15B/HDAC6/BAX/BAG3/DDRGK1/HERPUD2/ERO1A/CREB3L2/DAXX/NCK1/TMBIM6/NFE2L2/BAG6/YOD1/KLHL15/RHBDD1/DDIT3/DNAJB9	34
medium	GO:0071824	protein-DNA complex subunit organization	56/2299	306/21069	7.29118e-05	0.00239653	0.00201813	BDP1/MED27/DNAJC9/TP53/SPTY2D1/YEATS4/ACTL6A/KAT6B/SETD2/MCM3AP/ATF7IP/RPL23/SMARCA5/MED17/KAT6A/CDC45/RAD52/MED26/TAF1B/MED10/CHAF1A/MED25/DR1/TAF5/CAND1/SMARCB1/LIN54/TSPYL1/MED14/POLR1E/BRF1/CENPV/CENPS/SMARCC2/RAD51C/TCF4/ANP32E/DAXX/GMNN/BAZ2A/MED15/TAF1C/SMARCA4/CHRAC1/RSF1/SUPT16H/SMARCD2/POGZ/PCID2/RUVBL2/MED30/H2BC15/TERF1/H1-10/TAF13/MED31	56
medium	GO:2000113	negative regulation of cellular macromolecule biosynthetic process	56/2299	306/21069	7.29118e-05	0.00239653	0.00201813	EIF2AK3/TOB1/CSDE1/INPP5E/TUT7/TUT4/DCPS/ITM2B/ZFP36L2/CNOT9/PAN2/EXOSC9/FXR2/ROCK2/PATL1/DHX36/SYNCRIP/MRPL13/CIRBP/ROCK1/PURA/PNPT1/DBI/EIF4E/SAMD4B/DCP1A/EIF6/NT5C3B/INPP5K/EXOSC8/DIS3L2/CNOT8/RARA/FTO/FMR1/EIF2AK4/PDE12/BTG2/UNK/TNKS1BP1/CNOT6/TIA1/DHX9/DIS3/RNF139/DAPK3/TNRC6B/RC3H2/ZFP36L1/DCP1B/ILF3/MEX3D/GSK3B/CNOT6L/POLR2D/EIF4EBP2	56
medium	GO:0032508	DNA duplex unwinding	24/2299	96/21069	7.53841e-05	0.00246432	0.00207522	ASCC1/ERCC2/CDC45/CHD6/XRCC6/DHX36/RFC5/PURA/RPA1/RFC3/POT1/CHD3/DSCC1/SMARCAD1/NAV2/RFC2/DHX9/CHD8/CHD1L/RECQL/RTEL1/CHD7/RUVBL2/MCM7	24
medium	GO:0061640	cytoskeleton-dependent cytokinesis	27/2299	114/21069	7.61146e-05	0.00247475	0.002084	SEPTIN7/SEPTIN2/SEPTIN9/LZTS2/ACTR3/ROCK2/SNX9/BBS4/POLDIP2/ROCK1/RASA1/PLEC/SNX33/CUL7/EXOC4/RHOC/APC/DCTN3/EXOC6B/EXOC6/SEPTIN11/SPAST/SEPTIN10/SNX18/EXOC1/CHMP4A/CNTROB	27
medium	GO:0007059	chromosome segregation	71/2299	415/21069	8.23704e-05	0.00266375	0.00224316	NUP37/SIRT7/FEN1/PINX1/NIPBL/ERCC2/ACTL6A/ANAPC5/SMARCA5/ACTR3/RCC1/MAPRE1/PHF10/NUDC/EHMT2/USP9X/KPNB1/SMARCA2/RCC2/STAG2/NSMCE2/MAD2L1BP/MCMBP/XRCC3/SMARCB1/EML4/NSL1/DIS3L2/SLF2/WAPL/NCAPH2/MMS19/PHB2/LCMT1/MAD2L2/CENPS/CSNK2A2/SMC3/SPICE1/CHFR/TTL/SMARCC2/NCAPD2/PBRM1/RAD51C/DSCC1/TLK2/WRAP73/NDE1/CTNNB1/SMARCAD1/ESCO1/SMC1A/PDS5A/SMC5/APC/SMARCA4/NEK6/NR3C1/BAG6/PPP2R1A/KLHL22/SMARCD2/RMI1/P…	71
medium	GO:0031669	cellular response to nutrient levels	47/2299	245/21069	8.40582e-05	0.0027038	0.00227688	TXN2/EIF2AK3/RRP8/TP53/DEPDC5/DCPS/PRKAG2/SESN1/SP1/IMPACT/AMBRA1/EHMT2/MAP1LC3A/DAP/GABARAPL2/VPS41/HSPA5/SREBF1/PDK2/RIPOR1/MAP3K5/TTC5/PPM1D/ATP2B1/SLC38A2/TFEB/GAS2L1/SRF/KICS2/EIF2AK4/PRKAB2/KLF10/GBA1/PICK1/MAPK3/WDR59/USF2/RXRA/NFE2L2/USP33/PIK3C2B/FNIP1/PIK3C3/SH3GLB1/RALB/FOXO1/NDOR1	47
medium	GO:0036503	ERAD pathway	29/2299	127/21069	8.51387e-05	0.00270432	0.00227732	DNAJC18/HSP90B1/JKAMP/NGLY1/UBXN8/DNAJB14/SYVN1/ATF6/ECPAS/STT3B/ERLIN1/HSPA5/ERLEC1/TRIM25/TMUB1/EDEM1/DNAJB2/ERLIN2/USP19/NFE2L2/EDEM3/BAG6/YOD1/RNF139/BCAP31/UBQLN2/RHBDD1/GET4/DNAJB9	29
medium	GO:0150116	regulation of cell-substrate junction organization	20/2299	74/21069	9.18092e-05	0.00286131	0.00240952	SLK/IQSEC1/VEGFA/ROCK2/PPM1F/CORO1C/POLDIP2/ROCK1/RCC2/SLC9A1/PTK2/LIMS1/PIK3R1/PTPRA/LAMTOR2/ABL1/CLASP1/DAPK3/VCL/ARF6	20
medium	GO:0070085	glycosylation	49/2299	260/21069	9.52214e-05	0.00295236	0.00248619	PLOD3/PGM3/OGT/TMEM165/MOGS/FUT11/MAN1C1/PMM1/RXYLT1/GALNT2/FUOM/DDOST/EXT1/TMTC4/STT3B/POFUT2/NAGPA/EXTL3/TMTC3/MGAT4B/PIGV/DOLK/POMT1/PSEN1/B4GALT5/POMGNT1/RPN2/GBA1/SRD5A3/GALNT7/B3GAT3/TET2/DOLPP1/B3GNT2/ALG8/CLN5/NANS/EDEM3/EXT2/FUT8/B4GALT3/EOGT/GBGT1/GMPPB/MGAT2/B3GALT6/FUT4/ALG12/VEGFB	49
medium	GO:0120032	regulation of plasma membrane bounded cell projection assembly	42/2299	213/21069	0.000103651	0.00318772	0.00268439	EPS8/EPHA2/SEPTIN7/SEPTIN9/MARK4/ACTR3/EVI5L/FNBP1L/AKIRIN1/FXR2/BBS4/CORO1C/FAM98A/RCC2/ATG3/PIK3CA/EVL/KANK1/PIK3R1/TESK1/FMR1/SRF/CEP120/CEP97/MAP4/WRAP73/CYFIP1/TGFBR1/WASF2/APC/FUZ/PLEKHM1/SH3YL1/TWF1/CDC42EP1/CDK10/ARF6/HRAS/C15orf62/CNTROB/GSK3B/CDC42EP4	42
medium	GO:0040014	regulation of multicellular organism growth	19/2299	69/21069	0.000103872	0.00318772	0.00268439	NIPBL/FXN/ATRN/RAI1/CREB1/BBS4/PIK3CA/STAT5A/STAT5B/EZR/PEX5/SOCS2/FTO/BBS2/PPIB/APP/MBD5/CHD7/ZMPSTE24	19
medium	GO:0051642	centrosome localization	12/2299	33/21069	0.000108905	0.00332519	0.00280016	RANBP2/DYNC1LI2/KIF5B/TBCCD1/SUN2/AKAP9/EZR/INTS13/NDE1/FHOD1/SUN1/BICD2	12
medium	GO:0051646	mitochondrion localization	16/2299	53/21069	0.000109959	0.00334041	0.00281298	MFN2/RHOT1/MEF2A/CLUH/MYO19/HDAC6/MTM1/ACTR10/BRAT1/NECTIN2/LRPPRC/OPA1/SPAST/ARMCX3/KAT2A/HSBP1	16
medium	GO:0071501	cellular response to sterol depletion	8/2299	16/21069	0.000113881	0.00342387	0.00288326	ARHGEF10L/INSIG2/ERLIN1/SREBF1/LPCAT3/SCAP/ERLIN2/ZBTB7B	8
medium	GO:0071545	inositol phosphate catabolic process	9/2299	20/21069	0.000117777	0.00346797	0.0029204	INPP5E/BPNT1/INPP5A/INPP5K/BPNT2/MTMR2/OCRL/NUDT3/INPP5B	9
medium	GO:0030201	heparan sulfate proteoglycan metabolic process	14/2299	43/21069	0.00011877	0.00346797	0.0029204	GLCE/NDST1/EXT1/EXTL3/SGSH/GPC1/CTNNB1/B3GAT3/EXT2/TCF7L2/HGSNAT/B3GALT6/NAGLU/HS6ST1	14
medium	GO:0060612	adipose tissue development	16/2299	54/21069	0.000140573	0.00393277	0.00331181	LRP5/ARRDC3/BBS4/SPART/PIK3CA/PGRMC2/SLC25A25/FTO/PAXIP1/PPARD/NCOA2/SPTLC2/TBL1XR1/KLF7/HRAS/ARID5B	16
medium	GO:0048538	thymus development	15/2299	49/21069	0.000150387	0.00410403	0.00345602	HES1/CTC1/CITED2/PSEN1/PRDX2/SRF/JARID2/MAPK3/CTNNB1/ABL1/TGFBR1/ASXL1/ZBTB1/ZMPSTE24/RAF1	15
medium	GO:0009649	entrainment of circadian clock	12/2299	34/21069	0.000151689	0.00410403	0.00345602	RBM4B/TP53/PER2/GNAQ/CRY1/CRTC1/NR2F6/ID2/CRY2/FBXL12/PHLPP1/FBXL17	12
medium	GO:0016574	histone ubiquitination	17/2299	60/21069	0.000161736	0.00432374	0.00364104	RNF2/KDM2B/PCGF5/HUWE1/KDM1A/PCGF6/PCGF2/CTR9/BMI1/PHC1/CUL4B/SUZ12/ATXN7L3/DDB2/TRIP12/BABAM2/BCOR	17
medium	GO:0009895	negative regulation of catabolic process	65/2299	381/21069	0.000174773	0.0045707	0.00384901	DDIT4/TMEM39A/TOB1/CSDE1/GIPC1/ETFBKMT/OGT/TP53/RUBCN/SECISBP2/CYP51A1/RBM10/FURIN/RPL23/ANGEL2/MTMR9/NRDE2/TBC1D14/EHMT2/FUS/DHX36/USP9X/DAP/GABARAPL2/SYNCRIP/DHX34/CIRBP/TRIM39/HMGCR/NRBP2/POLDIP2/ROCK1/LRIG2/PIK3CA/PHAX/TRAF2/CRTC3/PSEN1/FMR1/HFE/MAD2L2/DDRGK1/CSNK2A2/RELA/MTM1/TLK2/LRPPRC/MTMR2/HNRNPA0/SMCR8/TSPO/USP19/BAG6/DHX9/N4BP1/DFFB/KLHL22/TRDMT1/SMG1/NOP53/RNF41/CHMP4A/STYX/TAB3/SNRNP…	65
medium	GO:0098813	nuclear chromosome segregation	61/2299	352/21069	0.000176113	0.00458579	0.00386172	SIRT7/FEN1/PINX1/NIPBL/ACTL6A/ANAPC5/SMARCA5/ACTR3/MAPRE1/PHF10/NUDC/EHMT2/KPNB1/SMARCA2/RCC2/STAG2/NSMCE2/MAD2L1BP/MCMBP/XRCC3/SMARCB1/EML4/NSL1/DIS3L2/SLF2/WAPL/NCAPH2/PHB2/LCMT1/MAD2L2/CENPS/SMC3/SPICE1/CHFR/TTL/SMARCC2/NCAPD2/PBRM1/RAD51C/DSCC1/WRAP73/CTNNB1/ESCO1/SMC1A/PDS5A/SMC5/APC/SMARCA4/NEK6/BAG6/PPP2R1A/KLHL22/SMARCD2/RMI1/POGZ/PCID2/ACTB/TERF1/CHMP4A/HDAC8/SUN1	61
medium	GO:0007623	circadian rhythm	43/2299	225/21069	0.000179647	0.00465765	0.00392224	RBM4B/BTBD9/PARP1/OGT/TP53/PER2/LGR4/RAI1/CREB1/ROCK2/HUWE1/USP9X/DBP/BTRC/SREBF1/GNAQ/CIPC/SIN3A/CRY1/CRTC1/PRMT5/NR2F6/HDAC2/NR1D1/HDAC1/BMAL1/KLF10/NAMPT/ID1/KLF9/KMT2A/KDM8/NCOA2/ID2/CRY2/FBXL12/NUDT12/PHLPP1/CSNK1E/NAGLU/GSK3B/JUND/FBXL17	43
medium	GO:0045445	myoblast differentiation	28/2299	126/21069	0.000183096	0.00466663	0.00392979	ACTL6A/PHF10/MBNL1/AKIRIN1/BCL9L/SMARCA2/PLEKHM3/MAP3K5/SMARCB1/IFRD1/PLEC/SRF/LRRC8A/SMARCC2/PBRM1/HINFP/ITGB1/PPARD/SMARCA4/BTG1/SMARCD2/TCF7L2/NOTCH1/ZFP36L1/ACTB/DDIT3/NRAS/GPX1	28
medium	GO:0097320	plasma membrane tubulation	9/2299	21/21069	0.000186193	0.00472554	0.0039794	ASAP1/FNBP1L/SNX9/SNX33/PLEKHM2/SNX18/SH3GLB1/MICALL1/CHMP4A	9
medium	GO:0002244	hematopoietic progenitor cell differentiation	30/2299	139/21069	0.000190485	0.00481415	0.00405402	SP3/HYAL2/HES1/TP53/PRRC2C/ERCC2/WDR7/AP3B1/DHX36/EXT1/ADAR/SIN3A/ZBTB24/NUDT21/SSBP3/PDCD2/CITED2/HSPA9/PSEN1/RARA/SRF/FLT1/ABL1/SIPA1L3/NFE2L2/PCID2/NOTCH1/FNIP1/ZBTB1/CEBPD	30
medium	GO:0007015	actin filament organization	79/2299	488/21069	0.000218761	0.00534897	0.00450439	EPS8/ARHGEF10L/PRKCI/SWAP70/PIK3R2/ADD3/HSP90B1/ACTR3/ARFIP2/CD47/ELMO2/MCU/PLEKHG2/CAPZA2/GRB2/ARPC3/ROCK2/CTTN/SNX9/PPM1F/BBS4/MTPN/CORO1C/TNFAIP1/ROCK1/SLC9A1/PIK3CA/EVL/RASA1/C9orf72/EZR/KANK1/PIK3R1/TESK1/INPP5K/PLEC/BCAR1/ASAP3/GAS2L1/MYO19/ARHGAP12/SRF/BAG4/MAD2L2/WDR1/CTNNA1/CAPZA1/RHOC/SORBS3/PICK1/ARPC5L/SPTAN1/ARHGAP18/ID1/CYFIP1/DBNL/ZYX/ABL1/TGFBR1/PXN/WASF2/NCK1/BAIAP2/FCHSD2/CLASP1…	79
medium	GO:0051348	negative regulation of transferase activity	54/2299	306/21069	0.000253524	0.00613381	0.00516532	HYAL2/PINX1/PARP3/PPP2R5A/TP53/DUSP10/SPRY2/RUBCN/MEN1/PRKAG2/RPL23/PIP4K2C/BAG2/LRP5/HEXIM1/PIP4K2B/PTPN1/PIK3CB/PPM1F/ADAR/WWTR1/HMGCR/MVP/CORO1C/SPRY4/PAQR3/SOCS5/GNAQ/PTPN2/DVL1/CDKN2C/TESK1/INPP5K/PSEN1/PLEC/IRS2/POT1/MAD2L2/LATS2/CEP43/GBA1/SMCR8/ABL1/APC/DUSP19/DUSP7/SOCS4/TRIB1/SH3BP5/HEXIM2/SPRED1/TERF1/TFAP4/GSK3B	54
medium	GO:0034502	protein localization to chromosome	27/2299	122/21069	0.000253919	0.00613381	0.00516532	PINX1/NIPBL/PARP3/MSH2/SETD2/CCT3/VCPIP1/RCC2/RPA1/SLF2/WAPL/JARID2/POT1/GNL3/LRWD1/TPP1/MRNIP/TERF2IP/SMC5/ACD/CCT2/TASOR/RUVBL2/XRCC4/IFFO1/TERF1/HDAC8	27
medium	GO:0071478	cellular response to radiation	39/2299	202/21069	0.000282299	0.00663293	0.00558563	HYAL1/HYAL2/NIPBL/PARP1/TP53/AKT2/CASP9/IMPACT/POLK/GRB2/POLH/PCNA/XRCC6/DHX36/TANK/XPC/NET1/HSPA5/KDM1A/CRY1/PIK3R1/RAD9A/BAX/EIF2AK4/EEF1D/TLK2/TNKS1BP1/TMEM109/CUL4B/N4BP1/DDB2/CRY2/RUVBL2/RHBDD1/BABAM2/ZBTB1/ZMPSTE24/HRAS/MGMT	39
medium	GO:0072384	organelle transport along microtubule	22/2299	92/21069	0.000293159	0.0068083	0.00573331	KIF5B/KIF3B/BLOC1S4/AP3B1/BLOC1S3/BORCS5/RHOT1/LAMP1/BLOC1S2/HDAC6/ACTR10/NDE1/LRPPRC/COPG2/OPA1/SPAST/ARHGAP21/ARMCX3/SUN1/BICD2/HSBP1/BORCS7	22
medium	GO:0006991	response to sterol depletion	8/2299	18/21069	0.000316735	0.00724395	0.00610017	ARHGEF10L/INSIG2/ERLIN1/SREBF1/LPCAT3/SCAP/ERLIN2/ZBTB7B	8
medium	GO:0046838	phosphorylated carbohydrate dephosphorylation	8/2299	18/21069	0.000316735	0.00724395	0.00610017	INPP5E/BPNT1/INPP5A/INPP5K/BPNT2/MTMR2/OCRL/INPP5B	8
medium	GO:0006406	mRNA export from nucleus	19/2299	75/21069	0.000339903	0.00769656	0.00648132	SMG6/UPF2/THOC6/SETD2/MCM3AP/NUP93/NUP107/RAE1/NUP88/FYTTD1/YTHDC1/NUP85/SMG1/NUP160/AGFG1/PCID2/GLE1/THOC3/POLR2D	19
medium	GO:0016050	vesicle organization	62/2299	368/21069	0.000344062	0.00772215	0.00650286	VPS33B/SPG11/STX12/VPS16/AKT2/PRKCI/PLEKHJ1/STAM2/HPS3/STAM/ATP6V1A/DNAJC13/BLOC1S4/VPS36/FNBP1L/AP3B1/HPS5/CREB1/SNAP23/PI4K2B/PIP4K2B/BLOC1S3/VPS41/TRAPPC11/CORO1C/PEF1/BLOC1S2/SEC24B/SNX33/GNAI3/AP1M1/TRAPPC9/HPS1/AP1S1/NECTIN2/TMF1/SCAP/GOSR2/AKTIP/TRAPPC13/RAB13/SEC23B/MIA3/ATP6V0B/ATP6V0A1/PLEKHF2/CLCN3/GOLPH3L/PLEKHM1/STX6/VIPAS39/SEC31A/VAMP4/SAR1B/AGFG1/SEC16A/VAMP8/PIK3C3/WASHC4/RAB8A/C…	62
medium	GO:0006979	response to oxidative stress	78/2299	488/21069	0.000356472	0.00789989	0.00665254	TXN2/HYAL1/HYAL2/PARP1/TP53/FXN/LONP1/PNKP/ERCC2/CYB5B/NUDT1/SESN1/SP1/IMPACT/GSS/SLC25A24/ATRN/JUN/PLEKHA1/RAD52/CRK/CHD6/P4HB/PCNA/MAP1LC3A/PRDX4/RIPK1/MTF1/NEIL1/NET1/OGG1/GCLM/OXR1/PON2/PRDX5/PDK2/PNPT1/MAP3K5/SIN3A/THG1L/PCGF2/PSEN1/HDAC2/PRDX2/ENDOG/BMAL1/ZNF277/PPP1R15B/HDAC6/NFE2L1/RELA/APTX/VKORC1L1/ERO1A/SIGMAR1/MAPK3/XRCC1/CTNNB1/FOXP1/PDK1/ADAM9/APP/ABL1/PXN/HMOX2/NFE2L2/G6PD/FUT8/ABC…	78
medium	GO:0006486	protein glycosylation	44/2299	239/21069	0.000358549	0.00789989	0.00665254	PLOD3/PGM3/OGT/TMEM165/MOGS/FUT11/MAN1C1/PMM1/RXYLT1/GALNT2/DDOST/EXT1/TMTC4/STT3B/POFUT2/NAGPA/EXTL3/TMTC3/MGAT4B/DOLK/POMT1/PSEN1/B4GALT5/POMGNT1/RPN2/SRD5A3/GALNT7/B3GAT3/TET2/DOLPP1/B3GNT2/ALG8/EDEM3/EXT2/FUT8/B4GALT3/EOGT/GBGT1/GMPPB/MGAT2/B3GALT6/FUT4/ALG12/VEGFB	44
medium	GO:0043413	macromolecule glycosylation	44/2299	239/21069	0.000358549	0.00789989	0.00665254	PLOD3/PGM3/OGT/TMEM165/MOGS/FUT11/MAN1C1/PMM1/RXYLT1/GALNT2/DDOST/EXT1/TMTC4/STT3B/POFUT2/NAGPA/EXTL3/TMTC3/MGAT4B/DOLK/POMT1/PSEN1/B4GALT5/POMGNT1/RPN2/SRD5A3/GALNT7/B3GAT3/TET2/DOLPP1/B3GNT2/ALG8/EDEM3/EXT2/FUT8/B4GALT3/EOGT/GBGT1/GMPPB/MGAT2/B3GALT6/FUT4/ALG12/VEGFB	44
medium	GO:0072595	maintenance of protein localization in organelle	13/2299	42/21069	0.000363057	0.00794104	0.00668719	INSIG2/ARL2/SUN2/KDELR1/TOPORS/BBS4/HSPA5/CDK5/KDELR2/MORC3/HK1/TSPO/SUN1	13
medium	GO:0045995	regulation of embryonic development	25/2299	112/21069	0.000368154	0.00802336	0.00675651	CCSAP/HES1/NIPBL/SEPTIN7/ACTL6A/DHX36/TADA3/DR1/MBIP/B4GALT5/INSR/NR2C2/INO80D/YEATS2/TADA2A/PHLDB1/CTNNB1/NFE2L2/BAG6/CLASP1/TRIP12/NOTCH1/RUVBL2/RBM19/KAT2A	25
medium	GO:0007178	transmembrane receptor protein serine/threonine kinase signaling pathway	68/2299	415/21069	0.000411967	0.00878716	0.00739971	ARID4B/TOB1/HES1/GIPC1/PARP1/OGT/TP53/ADAM17/SINHCAF/HIVEP1/SPRY2/TWSG1/MEN1/RBBP7/FURIN/SAP30L/JUN/BCL9L/EXT1/USP9X/NUP93/APPL1/HSPA5/WWTR1/SPART/LDLRAD4/PTK2/SIN3A/SNX25/USP15/CITED2/HDAC2/ACVR1/HDAC1/HEXA/HFE/ACVR1B/ZNF703/RNF111/ZFYVE9/LATS2/NLK/MTMR4/CTDSPL2/SAP30/MAPK3/ID1/ADAM9/BRMS1/ZYX/ABL1/TGFBR1/PXN/ARID4A/SH2B1/SUDS3/FUT8/TGFBR2/ZEB1/SUB1/NOTCH1/MEGF8/SPRED1/LEMD3/SMAD2/XIAP/ING2/PMEP…	68
medium	GO:0045936	negative regulation of phosphate metabolic process	78/2299	491/21069	0.0004306	0.00895317	0.00753952	DDIT4/HYAL2/PPP2R5A/PARP1/TP53/PPP1R15A/LRRK1/DUSP10/SPRY2/RUBCN/SEMA4D/SWAP70/MEN1/PRKAG2/IMPACT/PIP4K2C/JUN/BOD1L1/PWP1/ROCK2/LRP5/HEXIM1/PIP4K2B/PTPN1/PIK3CB/PPM1F/ADAR/IKBKB/WWTR1/HMGCR/FIS1/MVP/CORO1C/SPRY4/ROCK1/PAQR3/SOCS5/LDLRAD4/GNAQ/C9orf72/SNX25/PTPN2/DVL1/CDKN2C/TESK1/INPP5K/PSEN1/PLEC/IRS2/DNAJC3/PPP1R15B/BAG4/BAX/LATS2/CEP43/GBA1/TERF2IP/CTDSP2/YWHAB/SMCR8/DGKQ/ABL1/TSPO/NCK1/APC/PP…	78
medium	GO:0006605	protein targeting	59/2299	349/21069	0.000431658	0.00895317	0.00753952	ERBIN/GIPC1/AKT2/PRKCI/PEX3/TCAF1/SAE1/PITRM1/AP3B1/MFN2/ARIH2/LEPROT/HUWE1/ZDHHC20/LMAN1/PMPCB/VPS41/TRAM1/HSPA5/CDK5/SREBF1/NAGPA/FIS1/ATG3/TOMM40L/AIP/PEX5/INPP5K/EDEM1/BAG4/AP4E1/BAG3/CSNK2A2/BID/MTX1/HSPA4/YWHAB/ATG13/TSPO/SNX16/BAG6/MON1A/BCAP31/ZFAND2B/CIB1/PEX1/GET4/PIK3C3/YIF1B/SH3GLB1/SIL1/MICALL1/STOM/VPS13C/CHMP4A/BAP1/HRAS/ICMT/ARL6IP1	59
medium	GO:0010639	negative regulation of organelle organization	66/2299	401/21069	0.000438814	0.00907032	0.00763817	TMEM39A/SMG6/EPS8/PINX1/PARP1/TP53/FXN/SWAP70/ADD3/SMARCA5/MAPRE1/CAPZA2/EVI5L/PRELID1/EHMT2/CAMSAP1/HUWE1/CTC1/BBS4/MTPN/CAMSAP2/PIK3CA/MAD2L1BP/XRCC3/KANK1/PIK3R1/ATXN7/TESK1/INPP5K/WAPL/LCMT1/POT1/HDAC6/MAD2L2/CEP97/MTM1/CAPZA1/PICK1/SPTAN1/TERF2IP/MAP4/XRCC1/NAT10/SMCR8/TSPO/WASF2/APC/ACD/OPA1/BCL2L2/CLASP1/KLHL22/TWF1/RTEL1/ADD1/CIB1/PCID2/RNF41/ARPIN/SSH3/GHITM/TERF1/CDK10/CHMP4A/KAT2A/GPX1	66
medium	GO:0032535	regulation of cellular component size	65/2299	394/21069	0.000452593	0.0093231	0.00785103	EPS8/RB1CC1/SLC12A9/PPP1R15A/SEMA4D/SWAP70/PIK3R2/ADD3/PLEKHG2/CAPZA2/GRB2/DIP2B/VEGFA/ARPC3/CREB1/CTTN/SNX9/BBS4/CDK5/MTPN/SPART/BORCS5/PIK3CA/EVL/KDM1A/RASA1/SIN3A/EZR/IFRD1/BLOC1S2/KANK1/E2F4/SRF/LRRC8A/BAG4/WDR1/TTL/CAPZA1/ARPC5L/SPTAN1/ARHGAP18/CYFIP1/DBNL/ABL1/SLC12A4/NCK1/ZFYVE27/PEX11G/BAIAP2/FCHSD2/CLCN3/CLCN6/TWF1/ADD1/SEMA4C/CDC42EP1/MEGF8/SSH3/ARPC5/ARF6/C15orf62/GSK3B/CDC42EP4/WDTC1/…	65
medium	GO:0046349	amino sugar biosynthetic process	6/2299	11/21069	0.000476138	0.00948335	0.00798598	GNPDA2/PGM3/AMDHD2/GNE/GNPDA1/UAP1	6
medium	GO:1902884	positive regulation of response to oxidative stress	6/2299	11/21069	0.000476138	0.00948335	0.00798598	RIPK1/ENDOG/HDAC6/FOXP1/ABL1/SELENON	6
medium	GO:1990535	neuron projection maintenance	6/2299	11/21069	0.000476138	0.00948335	0.00798598	DCTN1/PSEN1/INSR/KIFBP/APP/ABCD1	6
medium	GO:0000209	protein polyubiquitination	48/2299	271/21069	0.000497437	0.00975624	0.00821578	ZNRF2/HACE1/SASH1/RNF34/ANAPC5/TRIM3/AMBRA1/WSB1/SYVN1/NEDD4L/ARIH2/TOPORS/HUWE1/KLHL42/BTRC/RNF19B/DCAF15/UBE2S/TRAF2/NHLRC3/LRSAM1/HDAC6/ANAPC10/RFFL/CHFR/RNF111/PRPF19/CBFB/AKTIP/CTNNB1/RBCK1/RNF216/RNF135/RNF19A/TRIM38/RNF187/PELI1/DDB2/RMND5A/TRIP12/RC3H2/RNF41/RNF217/ZNRF1/ANKIB1/KBTBD7/XIAP/FBXL17	48
medium	GO:0034249	negative regulation of cellular amide metabolic process	53/2299	309/21069	0.000580522	0.0112896	0.00950701	EIF2AK3/TOB1/CSDE1/INPP5E/TUT7/TUT4/DCPS/ZFP36L2/CNOT9/PAN2/EXOSC9/FXR2/ROCK2/PATL1/DHX36/SYNCRIP/MRPL13/CIRBP/ROCK1/PURA/PNPT1/EIF4E/SAMD4B/DCP1A/EIF6/NT5C3B/EXOSC8/DIS3L2/CNOT8/RARA/FTO/FMR1/EIF2AK4/PDE12/BTG2/UNK/TNKS1BP1/CNOT6/TIA1/DHX9/DIS3/RNF139/DAPK3/ORMDL2/TNRC6B/RC3H2/ZFP36L1/DCP1B/ILF3/MEX3D/CNOT6L/POLR2D/EIF4EBP2	53
medium	GO:0009150	purine ribonucleotide metabolic process	78/2299	496/21069	0.000585542	0.0113249	0.00953673	DDIT4/NADK/IMPDH1/TPST1/ATP5F1D/EPHA2/PARP1/PGK1/OGT/ADPGK/ARL2/NDUFB5/ATP6V1A/PRKAG2/NDUFA10/BPNT1/MLYCD/NME1/RAB23/DCAKD/GPI/DLST/ENTPD4/OXSM/HMGCR/FIS1/PANK2/CLPX/PDK2/DNAJC30/SLC35B3/SUCLG2/TPST2/PAICS/ACOT9/EIF6/NUDT9/NT5C/PSEN1/TJP2/SLC25A25/PDE4A/HK1/TECR/INSR/NDUFB3/NT5C2/PAPSS1/GNAI3/AMPD2/MPP1/ENO1/ADSS2/ACSF3/SDHD/NME3/ADCY9/PDK1/ACSL3/APP/TSPO/NDUFC2/PDHX/OPA1/MAGI3/NUDT3/CASK/NDUFB9/…	78
medium	GO:0010906	regulation of glucose metabolic process	24/2299	109/21069	0.000589428	0.0113635	0.00956926	SIRT7/RANBP2/OGT/TP53/AKT2/MLYCD/DYRK2/FAM3C/PDK2/CRY1/PTPN2/IRS2/INSR/FAM3A/LCMT1/PDK1/NLN/DGKQ/NR3C1/NCOA2/EPM2AIP1/KAT2A/FOXO1/ZMPSTE24	24
medium	GO:1901136	carbohydrate derivative catabolic process	36/2299	189/21069	0.000616123	0.0118025	0.00993894	GNPDA2/HYAL1/HYAL2/AMDHD2/NUDT1/NGLY1/MLYCD/ENTPD4/IDUA/NEIL1/STT3B/OGG1/GNPDA1/SUCLG2/NUDT9/NT5C/PDE4A/NT5C2/EDEM1/HEXA/GBA1/SGSH/GALT/GPC1/GNS/NUDT16/GLA/EDEM3/NUDT3/ABCD1/MBD4/DERA/NEU3/FUCA1/HGSNAT/NAGLU	36
medium	GO:0062012	regulation of small molecule metabolic process	59/2299	355/21069	0.000669926	0.012632	0.0106375	SIRT7/RANBP2/DDIT4/PARP1/ETFBKMT/OGT/LDLRAP1/TP53/AKT2/INSIG2/ARL2/PRKAG2/CLYBL/MLYCD/CD320/LPGAT1/DYRK2/ERLIN1/SREBF1/FIS1/PANK2/FAM3C/PDK2/DNAJC30/CRY1/PTPN2/EIF6/PSEN1/IRS2/NR1D1/INSR/FAM3A/LPCAT3/LCMT1/ENO1/SIRT5/SCAP/ME2/LACC1/PDK1/NLN/DGKQ/PPARD/APP/ERLIN2/TSPO/NDUFC2/NR3C1/NFKB1/NCOA2/ABCD1/PRXL2C/ARV1/EPM2AIP1/KAT2A/FOXO1/ZMPSTE24/ANTKMT/WDTC1	59
medium	GO:0051495	positive regulation of cytoskeleton organization	41/2299	225/21069	0.000690563	0.01294	0.0108968	ARHGEF10L/SWAP70/ARL2/CD47/MAPRE1/CKAP5/GRB2/DCTN1/ROCK2/CTTN/SNX9/KATNBL1/PPM1F/AKAP9/CDK5/EVL/TESK1/BAG4/CEP120/WDR1/RHOC/SORBS3/ID1/CLIP1/CYFIP1/ABL1/TGFBR1/PXN/WASF2/NCK1/BAIAP2/FCHSD2/CLASP1/SPAST/SLAIN2/CDC42EP1/FHOD1/ARF6/HRAS/C15orf62/CDC42EP4	41
medium	GO:0006997	nucleus organization	29/2299	143/21069	0.000714663	0.01335	0.0112421	PARP11/RRP8/USPL1/UBXN2A/SMARCA5/SUN2/RCC1/DCTN1/NUP93/NUP107/TMEM43/NUP98/ATXN7/PLEC/FAM118B/LMNB2/NEMP1/NECTIN2/TMF1/NUP153/BAZ2A/NEK6/REEP3/AGFG1/SPAST/CHMP4A/LEMD3/ZMPSTE24/SUN1	29
medium	GO:0042594	response to starvation	41/2299	226/21069	0.000756458	0.0140435	0.0118261	EIF2AK3/RRP8/TP53/DEPDC5/PRKAG2/SESN1/SP1/IMPACT/AMBRA1/EHMT2/MAP1LC3A/DAP/GABARAPL2/VPS41/HSPA5/SREBF1/RIPOR1/MAP3K5/TTC5/PPM1D/GNPAT/SLC38A2/TFEB/GAS2L1/HFE/KICS2/EIF2AK4/KLF10/GBA1/PICK1/MAPK3/WDR59/NFE2L2/USP33/PIK3C2B/FNIP1/PIK3C3/SH3GLB1/DDIT3/RALB/FOXO1	41
medium	GO:0045663	positive regulation of myoblast differentiation	13/2299	45/21069	0.000760166	0.0140689	0.0118475	ACTL6A/PHF10/AKIRIN1/SMARCA2/MAP3K5/SMARCB1/LRRC8A/SMARCC2/PBRM1/SMARCA4/BTG1/SMARCD2/ACTB	13
medium	GO:0006998	nuclear envelope organization	16/2299	62/21069	0.000783378	0.014454	0.0121718	PARP11/UBXN2A/SUN2/RCC1/DCTN1/NUP93/TMEM43/LMNB2/NEMP1/NEK6/REEP3/SPAST/CHMP4A/LEMD3/ZMPSTE24/SUN1	16
medium	GO:0032469	endoplasmic reticulum calcium ion homeostasis	9/2299	25/21069	0.000863083	0.0153825	0.0129537	THADA/TMTC4/FIS1/PSEN1/BAX/APP/TMBIM6/BCAP31/PACS2	9
medium	GO:0007098	centrosome cycle	29/2299	145/21069	0.000901429	0.0156708	0.0131965	ARL2/MARK4/KIF3B/CCNL1/CDK2/CKAP5/DCTN1/HAUS2/ROCK2/CEP250/RANBP1/BBS4/XRCC3/CEP76/CEP120/XPO1/HAUS5/TUBE1/SPICE1/HAUS7/CHD3/NDE1/CTNNB1/CEP68/NAT10/USP33/HAUS3/KAT2A/CNTROB	29
medium	GO:0010761	fibroblast migration	15/2299	57/21069	0.000908468	0.0157476	0.0132612	HYAL2/APPL1/CORO1C/RCC2/ZFAND5/PTK2/LAMTOR2/MTA2/PLEC/BAG4/RFFL/ITGB1/GNA12/FUT8/ARID5B	15
medium	GO:0051258	protein polymerization	53/2299	315/21069	0.00091702	0.0158502	0.0133475	EPS8/ARL2/PIK3R2/ADD3/MAPRE1/PLEKHG2/CAPZA2/AMBRA1/CKAP5/GRB2/DCTN1/ARPC3/HAUS2/CAMSAP1/CTTN/SNX9/AKAP9/BBS4/MTPN/CAMSAP2/UBE2S/EVL/RASA1/KANK1/BAG4/CAPZA1/TUBGCP4/TUBGCP5/ARPC5L/SPTAN1/ARHGAP18/NDE1/CLIP1/CYFIP1/RNF135/DBNL/ABL1/NCK1/BAIAP2/FCHSD2/CLASP1/TWF1/ADD1/SLAIN2/CDC42EP1/SSH3/CHMP4A/MSRB2/ARPC5/ARF6/C15orf62/MZT1/CDC42EP4	53
medium	GO:0034470	ncRNA processing	76/2299	489/21069	0.000960449	0.0163657	0.0137817	SIRT7/RRP8/GAR1/TP53/SRRT/TRMT6/TUT7/ERCC2/FBL/TUT4/OSGEP/ZC3H7B/WDR75/NOL6/THADA/TSR1/PWP1/TRMT44/EXOSC9/QTRT2/DTWD1/UTP4/RIPK1/C9orf64/TSEN34/ESF1/ADAR/PUSL1/FAM98A/INTS9/NGDN/PDCD11/BYSL/DDX52/THG1L/MTREX/TPRKB/EIF6/XRN2/ELP6/DIMT1/EXOSC8/URB1/DICER1/RPS24/INTS13/DDX21/RSL1D1/EXOSC4/NOP2/ZC3H7A/INTS14/RPS8/WDR12/ADAT1/KARS1/NPM3/NAT10/METTL1/DROSHA/NUDT16/POLR3K/DIS3/TRDMT1/UTP18/ZNHIT6/NOP53/…	76
medium	GO:2000736	regulation of stem cell differentiation	20/2299	88/21069	0.00107688	0.0180934	0.0152366	HES1/RBBP7/GATAD2A/ZFP36L2/PWP1/DHX36/BBS12/NUDT21/OCIAD1/HSPA9/HDAC2/MTA2/HDAC1/CDK12/CHD3/ABL1/MTCH2/NFE2L2/NOTCH1/GSK3B	20
medium	GO:0070584	mitochondrion morphogenesis	8/2299	21/21069	0.00109109	0.0182303	0.0153518	FIS1/PANK2/POLDIP2/PNPT1/PLEC/BAX/MTM1/POLG2	8
medium	GO:1901990	regulation of mitotic cell cycle phase transition	62/2299	385/21069	0.00112564	0.0186522	0.0157071	HYAL1/PINX1/TP53/ADAM17/ERCC2/CDK2AP2/FBXO31/ACTL6A/ANAPC5/ZFP36L2/PHF10/CDK2/AMBRA1/FOXO4/APPL1/CTC1/XPC/SMARCA2/TRIM39/RCC2/KMT2E/NSMCE2/MAD2L1BP/XRCC3/SIN3A/SMARCB1/CDKN2C/ACVR1/TAOK3/PHB2/LCMT1/MAD2L2/CHFR/BID/SMARCC2/PBRM1/RAD51C/MRNIP/RBL2/CDC7/CTDSP2/APP/CASP2/CUL4B/NABP1/APC/SMARCA4/NEK6/MIIP/KLHL22/SMARCD2/ID2/NOP53/PSME1/PCID2/ZFP36L1/ACTB/BABAM2/DCUN1D3/TFAP4/CDK10/AVEN	62
medium	GO:0000002	mitochondrial genome maintenance	11/2299	36/21069	0.00114576	0.0188299	0.0158568	PARP1/TP53/LONP1/SLC25A33/MGME1/MEF2A/ENDOG/SLC25A36/POLG2/PRIMPOL/OPA1	11
medium	GO:0150115	cell-substrate junction organization	23/2299	108/21069	0.00122744	0.0197937	0.0166684	SLK/IQSEC1/VEGFA/ROCK2/CTTN/PPM1F/CORO1C/POLDIP2/ROCK1/RCC2/SLC9A1/PTK2/LIMS1/PIK3R1/PTPRA/LAMTOR2/PLEC/ABL1/CLASP1/DAPK3/BCR/VCL/ARF6	23
medium	GO:0046677	response to antibiotic	14/2299	53/21069	0.00127984	0.020474	0.0172412	HYAL1/HYAL2/TP53/CASP9/JAK1/RPL23/EHMT2/UROS/HSPA5/SLC9A1/KDM1A/ENDOG/CYB5R4/ZC3H8	14
medium	GO:0016051	carbohydrate biosynthetic process	40/2299	225/21069	0.00129858	0.0207187	0.0174473	SIRT7/UGP2/RANBP2/PGK1/OGT/AKT2/NDST1/PER2/CHST14/EXT1/GPI/DYRK2/FAM3C/PDK2/CRY1/PTPN2/INPP5K/IRS2/NR1D1/B4GALT5/INSR/FAM3A/G6PC3/NLN/DGKQ/B3GNT2/NANS/NR3C1/G6PD/EXT2/FUT8/NFKB1/CHST12/EPM2AIP1/MGAT2/GBE1/FUT4/KAT2A/FOXO1/GSK3B	40
medium	GO:0043249	erythrocyte maturation	7/2299	17/21069	0.00131691	0.0208453	0.0175539	ERCC2/FAM210B/FLVCR1/L3MBTL3/G6PD/BAP1/BRD1	7
medium	GO:1903829	positive regulation of protein localization	76/2299	495/21069	0.00135514	0.021227	0.0178754	EIF2AK3/HYAL2/PINX1/EPHA2/PARP1/AKT2/PRKCI/APBB3/KIF5B/PIK3R2/TCAF1/SAE1/MARK4/CAPN10/XPO4/MCU/TMEM30A/ARIH2/SYTL4/ROCK2/LEPROT/CEP250/HUWE1/CCT3/TRIM28/ZDHHC8/ERGIC3/ABHD17B/TM7SF3/CNPY4/CDK5/WWTR1/FIS1/NPTN/FRMD4A/LRIG2/RIPOR1/EZR/DVL1/PIK3R1/TESK1/PSEN1/IRS2/SNX33/EDEM1/LRRC8A/CEP120/BAG3/DDRGK1/CSNK2A2/GNL3/C2CD2L/CTDSPL2/ITGB1/B3GAT3/PTPN9/ACSL3/ATG13/ADAM9/PPARD/APC/CCT2/GOLPH3L/BCAP31/TRIM…	76
medium	GO:0051851	modulation by host of symbiont process	21/2299	96/21069	0.00137537	0.0214879	0.0180951	TMEM41B/IGF2R/SP1/JUN/ROCK2/ZDHHC20/ZDHHC8/SMARCB1/INPP5K/FMR1/HDAC1/PI4KA/YTHDC2/NAPEPLD/EIF2AK4/SAP30/PPIB/SMARCA4/PIK3C3/TFAP4/STOM	21
medium	GO:0032970	regulation of actin filament-based process	68/2299	434/21069	0.00139708	0.0217705	0.0183331	EPS8/ARHGEF10L/SWAP70/PIK3R2/ADD3/ARFIP2/CD47/PLEKHG2/CAPZA2/GRB2/ARPC3/CRK/ROCK2/CTTN/SNX9/PPM1F/AKAP9/BBS4/CDK5/MTPN/ROCK1/SLC9A1/PIK3CA/EVL/RASA1/C9orf72/KANK1/PIK3R1/TESK1/INPP5K/ASAP3/BAG4/WDR1/CAPZA1/RHOC/SORBS3/PICK1/ARPC5L/SPTAN1/ARHGAP18/ID1/CYFIP1/DBNL/ABL1/TGFBR1/PXN/WASF2/NCK1/BAIAP2/FCHSD2/CLASP1/ARHGAP17/DAPK3/TWF1/ADD1/ARPIN/ARHGDIA/CDC42EP1/SSH3/FHOD1/CDK10/WASHC4/RHOBTB2/ARPC5/AR…	68
medium	GO:0001933	negative regulation of protein phosphorylation	59/2299	366/21069	0.00142556	0.0220825	0.0185958	DDIT4/HYAL2/LRRK1/DUSP10/SPRY2/SEMA4D/MEN1/PRKAG2/IMPACT/JUN/PWP1/LRP5/HEXIM1/PTPN1/PIK3CB/PPM1F/ADAR/WWTR1/HMGCR/MVP/CORO1C/SPRY4/PAQR3/SOCS5/LDLRAD4/GNAQ/C9orf72/SNX25/PTPN2/DVL1/CDKN2C/TESK1/INPP5K/PSEN1/PLEC/DNAJC3/PPP1R15B/BAX/LATS2/CEP43/GBA1/TERF2IP/CTDSP2/SMCR8/DGKQ/ABL1/NCK1/APC/PPP2R1A/DUSP19/CIB1/DUSP7/SOCS4/TRIB1/SH3BP5/HEXIM2/SPRED1/TFAP4/PMEPA1	59
medium	GO:0022604	regulation of cell morphogenesis	55/2299	336/21069	0.00142583	0.0220825	0.0185958	EPS8/SEPTIN7/SEMA4D/FBXO31/TBCCD1/ZRANB1/PLEKHO1/BCL9L/VEGFA/NEDD4L/CRK/PARP6/CAMSAP1/P4HB/DHX36/CORO1C/SPRY4/RCC2/DNMBP/RASA1/PTK2/EZR/DVL1/LIMS1/KANK1/ACTN4/PDZD8/TESK1/CUL7/WDR1/RHOC/ARHGAP18/CFDP1/FGD1/CYFIP1/DBNL/EEF2K/GNA12/ABL1/BAIAP2/CFAP410/DAPK3/ZMYM4/CIB1/ZMYM6/PHIP/LIMD1/ARPIN/CDC42EP1/DOCK1/RHOBTB2/ZMPSTE24/C15orf62/PRPF40A/CDC42EP4	55
medium	GO:0071496	cellular response to external stimulus	57/2299	351/21069	0.00142866	0.0220825	0.0185958	TXN2/EIF2AK3/RRP8/TP53/DEPDC5/NUDT1/DCPS/PRKAG2/SESN1/SP1/IMPACT/TNFRSF1A/AMBRA1/EHMT2/MAP1LC3A/DAP/GABARAPL2/VPS41/HSPA5/MTPN/SREBF1/PDK2/SLC9A1/RIPOR1/MAP3K5/TTC5/PPM1D/ATP2B1/SLC38A2/PLEC/TFEB/GAS2L1/SRF/KICS2/BAG3/BCL10/EIF2AK4/PRKAB2/KLF10/GBA1/PICK1/MAPK3/WDR59/USF2/RXRA/CASP2/NFE2L2/NFKB1/USP33/PIK3C2B/FNIP1/PIK3C3/SH3GLB1/RALB/ERCC6/FOXO1/NDOR1	57
medium	GO:0070417	cellular response to cold	6/2299	13/21069	0.00145748	0.0220825	0.0185958	EIF2AK3/RNF34/SLC9A1/DNAJC3/EIF2AK4/FOXO1	6
medium	GO:0048872	homeostasis of number of cells	55/2299	337/21069	0.00152706	0.0229059	0.0192891	SP3/ADAM17/BCL6/PTPN11/ERCC2/RCOR1/LGR4/AP3B1/VEGFA/DNASE2/EXT1/GPI/PRMT1/PIK3CB/MIF/ADAR/KMT2E/KRAS/STAT5B/PTPN2/OCIAD1/ANKRD54/CITED2/HSPA9/PRDX2/SRF/FAM210B/LPCAT3/RPS24/BAX/ACVR1B/BCL10/PKNOX1/NAPEPLD/GBA1/ZC3H8/FLVCR1/L3MBTL3/SLC39A3/ABL1/KMT2A/ARID4A/G6PD/BCR/ID2/FH/NOTCH1/RC3H2/ZFP36L1/ASXL1/ADGRG1/XIAP/BAP1/BRD1/ITPKB	55
medium	GO:0009220	pyrimidine ribonucleotide biosynthetic process	8/2299	22/21069	0.00155189	0.0231055	0.0194572	NME1/UMPS/UCKL1/NME3/CTPS2/CAD/CMPK1/NME2	8
medium	GO:1903421	regulation of synaptic vesicle recycling	8/2299	22/21069	0.00155189	0.0231055	0.0194572	BTBD9/CDK5/GRIPAP1/ROCK1/CYFIP1/DGKQ/PPP3CC/VAMP4	8
medium	GO:0035994	response to muscle stretch	9/2299	27/21069	0.00161838	0.0239178	0.0201413	JUN/GPI/SLC9A1/PIK3CA/PTK2/RELA/CTNNB1/NFKB1/RAF1	9
medium	GO:0010821	regulation of mitochondrion organization	32/2299	172/21069	0.00178633	0.0255827	0.0215434	SIRT7/TP53/FXN/MCU/AMBRA1/STAT2/PRELID1/TMEM135/CTTN/HUWE1/SREBF1/FIS1/RHOT1/ENDOG/MYO19/VDAC1/HDAC6/BAX/CSNK2A2/BID/PLSCR3/TSPO/MTCH2/OPA1/BCL2L2/RALBP1/RNF41/GHITM/VPS13C/PRMT6/GSK3B/GPX1	32
medium	GO:0046434	organophosphate catabolic process	32/2299	172/21069	0.00178633	0.0255827	0.0215434	INPP5E/GDE1/BPNT1/MLYCD/ENTPD4/NEIL1/OGG1/GPCPD1/INPP5A/SUCLG2/ENTPD6/NUDT9/INPP5K/NT5C/PDE4A/NT5C2/PLD2/NAPEPLD/BPNT2/MTMR2/PLCG1/OCRL/NUDT16/PLBD2/NUDT3/ABCD1/NUDT17/MBD4/DERA/INPP5B/NUDT12/PNPLA6	32
medium	GO:0032006	regulation of TOR signaling	23/2299	111/21069	0.00180097	0.0257312	0.0216684	DDIT4/DEPDC5/SESN1/USP9X/PIK3CA/C9orf72/LAMTOR2/ENDOG/GPR137/BMAL1/KICS2/RFFL/MTM1/GBA1/SIK3/WDR59/SMCR8/DGKQ/GNA12/KLHL22/FNIP1/SLC38A9/ZMPSTE24	23
medium	GO:0097581	lamellipodium organization	21/2299	98/21069	0.00180609	0.0257432	0.0216785	EPHA2/ACTR3/ARFIP2/AKIRIN1/PLEKHO1/CTTN/CORO1C/PIK3CA/KANK1/PIK3R1/ITGB1/NUP85/CYFIP1/WASF2/NCK1/SH2B1/TWF1/VCL/SNX2/ARPIN/ARPC5	21
medium	GO:0044088	regulation of vacuole organization	16/2299	67/21069	0.00190509	0.0269465	0.0226918	TMEM39A/PIP4K2C/TBC1D14/EHMT2/PIP4K2B/C9orf72/SNX4/LRSAM1/MTM1/SMCR8/UBQLN2/SNX18/SH3GLB1/RALB/CHMP4A/SNX30	16
medium	GO:0031146	SCF-dependent proteasomal ubiquitin-dependent protein catabolic process	13/2299	50/21069	0.00220028	0.0300106	0.0252721	FBXO31/FBXL4/FBXO33/BTRC/WWTR1/FBXL20/FBXL18/CUL4B/FBXL5/FBXL12/STYX/FBXL14/FBXL17	13
medium	GO:0045619	regulation of lymphocyte differentiation	42/2299	246/21069	0.00222383	0.0301949	0.0254273	SH3RF1/BCL6/IL4R/DUSP10/FANCA/ACTL6A/ZFP36L2/PHF10/AMBRA1/IL23A/PRELID1/AP3B1/XRCC6/SMARCA2/SOCS5/SMARCB1/STAT5B/PTPN2/NFKBIZ/PRDX2/RARA/SMARCC2/PBRM1/RIPK2/ZC3H8/CBFB/DROSHA/ABL1/SMARCA4/TGFBR2/ZEB1/SMARCD2/ID2/ZBTB7B/PCID2/RC3H2/ZFP36L1/ACTB/RNF41/ZBTB1/KAT2A/ITPKB	42
medium	GO:0033692	cellular polysaccharide biosynthetic process	16/2299	68/21069	0.00224343	0.0303925	0.0255937	UGP2/AKT2/NDST1/PER2/EXT1/DYRK2/INPP5K/IRS2/NR1D1/B4GALT5/INSR/B3GNT2/EXT2/EPM2AIP1/GBE1/GSK3B	16
medium	GO:0009209	pyrimidine ribonucleoside triphosphate biosynthetic process	6/2299	14/21069	0.00231631	0.0310995	0.0261891	NME1/UCKL1/NME3/CTPS2/CAD/NME2	6
medium	GO:0090158	endoplasmic reticulum membrane organization	6/2299	14/21069	0.00231631	0.0310995	0.0261891	STX18/VCPIP1/REEP5/LPCAT3/MOSPD3/ARL6IP1	6
medium	GO:0046326	positive regulation of glucose import	11/2299	39/21069	0.00235122	0.0311511	0.0262325	AKT2/PRKCI/PTPN11/CAPN10/APPL1/MEF2A/PIK3R1/CREBL2/IRS2/INSR/NFE2L2	11
medium	GO:0030217	T cell differentiation	54/2299	336/21069	0.00236065	0.0312032	0.0262764	SP3/TP53/ADAM17/SH3RF1/BCL6/IL4R/DUSP10/FANCA/PIK3R2/ACTL6A/ZFP36L2/PHF10/AMBRA1/IL23A/KDELR1/PRELID1/AP3B1/PATZ1/SMARCA2/SOCS5/SMARCB1/STAT5B/PTPN2/NFKBIZ/PIK3R1/PRDX2/RARA/NCAPH2/SRF/PKNOX1/SMARCC2/PBRM1/GBA1/RIPK2/BMI1/ZC3H8/CBFB/CTNNB1/FOXP1/DROSHA/ABL1/SMARCA4/TGFBR2/ZEB1/SMARCD2/ZBTB7B/CHD7/RC3H2/ZFP36L1/ACTB/NHEJ1/ZBTB1/KAT2A/ITPKB	54
medium	GO:0071453	cellular response to oxygen levels	33/2299	182/21069	0.00236553	0.0312032	0.0262764	PGK1/TP53/ATP6V1A/VEGFA/ROCK2/P4HB/PIK3CB/ATP6V0A2/SLC9A1/HYOU1/CFLAR/CITED2/ENDOG/PHB2/ENO1/ATP6V0D1/PICK1/ERO1A/SDHD/PDK1/PPARD/EEF2K/TMBIM6/USP19/NFE2L2/DNMT3A/NOP53/RWDD3/NOTCH1/ZFP36L1/FOXO1/JUND/EGLN1	33
medium	GO:0065004	protein-DNA complex assembly	45/2299	269/21069	0.00239353	0.031373	0.0264194	BDP1/MED27/DNAJC9/TP53/SPTY2D1/KAT6B/ATF7IP/SMARCA5/MED17/KAT6A/CDC45/RAD52/MED26/TAF1B/MED10/CHAF1A/MED25/DR1/TAF5/CAND1/SMARCB1/TSPYL1/MED14/POLR1E/BRF1/CENPV/CENPS/RAD51C/TCF4/DAXX/GMNN/BAZ2A/MED15/TAF1C/SMARCA4/CHRAC1/RSF1/SUPT16H/POGZ/MED30/H2BC15/TERF1/H1-10/TAF13/MED31	45
medium	GO:1990144	intrinsic apoptotic signaling pathway in response to hypoxia	5/2299	10/21069	0.00242013	0.031373	0.0264194	TP53/PIK3CB/HYOU1/ENO1/TMBIM6	5
medium	GO:0001570	vasculogenesis	18/2299	81/21069	0.00243835	0.0315412	0.026561	EPHA2/SETD2/VEGFA/CCM2/RASA1/CITED2/TIPARP/RAPGEF2/CUL7/CTNNB1/PAXIP1/TGFBR2/RIN2/NOTCH1/ZFP36L1/HDAC7/SPRED1/RAP1A	18
medium	GO:0031346	positive regulation of cell projection organization	59/2299	375/21069	0.00252516	0.0325224	0.0273873	EPS8/SEPTIN7/PRKCI/SEMA4D/FBXO31/SEPTIN9/MARK4/ACTR3/FNBP1L/AKIRIN1/TMEM30A/VEGFA/PARP6/FIG4/DHX36/BBS4/HSPA5/KIDINS220/CORO1C/NPTN/FAM98A/PIK3CA/KDM1A/CRTC1/DVL1/PIK3R1/CFLAR/RAPGEF2/FMR1/CUL7/SRF/CEP120/CREB3L2/WRAP73/CYFIP1/P3H1/DBNL/EEF2K/ABL1/TGFBR1/WASF2/NCK1/ZFYVE27/APC/BAIAP2/FUZ/NFE2L2/PLEKHM1/TWF1/SF3A2/CDC42EP1/MEGF8/KAT2A/HRAS/C15orf62/GSK3B/EHD1/RAP1A/CDC42EP4	59
medium	GO:0000266	mitochondrial fission	12/2299	45/21069	0.00255205	0.0325224	0.0273873	MCU/STAT2/AP3B1/TMEM135/FIS1/MTFR1/MYO19/COX10/MTFP1/OPA1/RALBP1/MTFR1L	12
medium	GO:0021915	neural tube development	32/2299	176/21069	0.00260829	0.0327568	0.0275847	PLOD3/HES1/EPHA2/KDM2B/PHACTR4/SETD2/AMBRA1/ARL13B/CBY1/MIB1/BBS4/LUZP1/ITPK1/DVL1/SSBP3/SEC24B/CITED2/PSEN1/RARA/BCL10/BMI1/ABL1/FUZ/OPA1/MTHFR/MED12/SEMA4C/NOTCH1/ZFP36L1/STK3/KAT2A/ZNF358	32
medium	GO:0015012	heparan sulfate proteoglycan biosynthetic process	10/2299	34/21069	0.00261531	0.0327568	0.0275847	GLCE/NDST1/EXT1/EXTL3/CTNNB1/B3GAT3/EXT2/TCF7L2/B3GALT6/HS6ST1	10
medium	GO:0043123	positive regulation of I-kappaB kinase/NF-kappaB signaling	38/2299	219/21069	0.0026265	0.0327568	0.0275847	GOLT1B/MTDH/CXXC5/TNFRSF1A/MIER1/LITAF/DHX36/RIPK1/IRF3/IKBKB/SLC20A1/MAP3K3/SHISA5/TRIM25/TRAF2/CFLAR/TRADD/BCL10/RELA/NDFIP2/RHOC/DDX21/EEF1D/RIPK2/TERF2IP/CTNNB1/RBCK1/IFIT5/ABL1/TRIM38/NEK6/ZDHHC13/PELI1/TRIM8/IRAK4/ZDHHC17/TSPAN6/TAB3	38
medium	GO:0051893	regulation of focal adhesion assembly	16/2299	69/21069	0.00263034	0.0327568	0.0275847	SLK/VEGFA/ROCK2/PPM1F/CORO1C/POLDIP2/ROCK1/RCC2/SLC9A1/PTK2/LIMS1/PTPRA/ABL1/CLASP1/DAPK3/VCL	16
medium	GO:0090109	regulation of cell-substrate junction assembly	16/2299	69/21069	0.00263034	0.0327568	0.0275847	SLK/VEGFA/ROCK2/PPM1F/CORO1C/POLDIP2/ROCK1/RCC2/SLC9A1/PTK2/LIMS1/PTPRA/ABL1/CLASP1/DAPK3/VCL	16
medium	GO:0060216	definitive hemopoiesis	7/2299	19/21069	0.00280415	0.0347249	0.029242	SP3/ZFP36L2/ADAR/HIPK1/CBFB/KMT2A/BCR	7
medium	GO:0010631	epithelial cell migration	61/2299	393/21069	0.00296693	0.0361989	0.0304833	GLIPR2/HYAL1/GIPC1/EPHA2/ADAM17/DUSP10/SASH1/PTPN11/SP1/IQSEC1/JUN/VEGFA/PATZ1/ROCK2/GPI/PIK3CB/PPM1F/CORO1C/MAP3K3/ROCK1/VASH1/PIK3CA/EVL/STAT5A/PTK2/PKN3/P2RX4/KANK1/TESK1/BCAR1/IRS2/SRF/HDAC6/LGALS8/ITGB1/ID1/FOXP1/ADAM9/PAXIP1/PPARD/PLCG1/RAB13/ABL1/TGFBR1/PXN/MIA3/NFE2L2/CLASP1/TGFBR2/RIN2/CIB1/NOTCH1/HDAC7/PDCD10/DOCK1/SPRED1/PRCP/GFUS/MCC/ARF6/GPX1	61
medium	GO:0006109	regulation of carbohydrate metabolic process	34/2299	192/21069	0.00305619	0.0372125	0.0313368	SIRT7/RANBP2/DDIT4/OGT/TP53/AKT2/ARL2/PRKAG2/MLYCD/DYRK2/FAM3C/PDK2/CRY1/PTPN2/EIF6/INPP5K/PSEN1/IRS2/INSR/FAM3A/LCMT1/PDK1/NLN/DGKQ/APP/NR3C1/NFKB1/NCOA2/PRXL2C/EPM2AIP1/KAT2A/FOXO1/ZMPSTE24/GSK3B	34
medium	GO:0010611	regulation of cardiac muscle hypertrophy	16/2299	70/21069	0.00307098	0.0373171	0.0314249	PARP1/TNFRSF1A/GLRX3/ROCK2/MTPN/ROCK1/SLC9A1/PARP2/MEF2A/P2RX4/JARID2/FOXP1/G6PD/TWF1/NOTCH1/FOXO1	16
medium	GO:0006839	mitochondrial transport	37/2299	214/21069	0.00315312	0.038238	0.0322004	SLC25A20/TP53/SAE1/PITRM1/SLC25A24/MFN2/ARIH2/LEPROT/HUWE1/LMAN1/PMPCB/SREBF1/FIS1/SLC9A1/TOMM40L/RHOT1/AIP/BLOC1S2/PSEN1/BAG4/BAX/BAG3/CSNK2A2/BID/KIFBP/CPT2/MTX1/HSPA4/FLVCR1/ATG13/TSPO/BCL2L2/BCAP31/SLC25A16/SH3GLB1/BAP1/GSK3B	37
medium	GO:0070301	cellular response to hydrogen peroxide	20/2299	96/21069	0.00324252	0.0390857	0.0329143	FXN/IMPACT/PLEKHA1/PCNA/MAP1LC3A/RIPK1/NET1/MAP3K5/PCGF2/HDAC2/ENDOG/ZNF277/HDAC6/RELA/SIGMAR1/FOXP1/ABL1/NFE2L2/PDCD10/KDM6B	20
medium	GO:0072659	protein localization to plasma membrane	50/2299	311/21069	0.00331453	0.0397149	0.0334441	PPP2R5A/EPHA2/LDLRAP1/AKT2/PRKCI/FRMD8/KIF5B/PIK3R2/DENND4C/TMBIM1/TNFRSF1A/AFDN/ROCK2/ZDHHC8/EHD4/APPL1/CNPY4/IKBKB/CDK5/GRIPAP1/ROCK1/PACS1/EZR/RAB12/PIK3R1/INPP5K/NUMB/RAPGEF2/BAG4/BBS2/ITGB1/PTPN9/ACSL3/TSPAN17/RAB13/VAMP5/ZFYVE27/ASB3/GOLPH3L/CIB1/SEC16A/VAMP8/ACTB/RAB8A/RSC1A1/ARF6/PACS2/RAB31/EHD1/RAP1A	50
medium	GO:0006140	regulation of nucleotide metabolic process	21/2299	103/21069	0.00340811	0.0406742	0.0342519	DDIT4/PARP1/OGT/TP53/ARL2/PRKAG2/FIS1/PDK2/DNAJC30/EIF6/PSEN1/INSR/ENO1/ME2/LACC1/PDK1/APP/TSPO/NDUFC2/PRXL2C/ANTKMT	21
medium	GO:0090132	epithelium migration	61/2299	396/21069	0.00353207	0.0414949	0.0349431	GLIPR2/HYAL1/GIPC1/EPHA2/ADAM17/DUSP10/SASH1/PTPN11/SP1/IQSEC1/JUN/VEGFA/PATZ1/ROCK2/GPI/PIK3CB/PPM1F/CORO1C/MAP3K3/ROCK1/VASH1/PIK3CA/EVL/STAT5A/PTK2/PKN3/P2RX4/KANK1/TESK1/BCAR1/IRS2/SRF/HDAC6/LGALS8/ITGB1/ID1/FOXP1/ADAM9/PAXIP1/PPARD/PLCG1/RAB13/ABL1/TGFBR1/PXN/MIA3/NFE2L2/CLASP1/TGFBR2/RIN2/CIB1/NOTCH1/HDAC7/PDCD10/DOCK1/SPRED1/PRCP/GFUS/MCC/ARF6/GPX1	61
medium	GO:0031529	ruffle organization	16/2299	71/21069	0.00357083	0.041787	0.035189	EPS8/ARFIP2/PLEKHA1/CORO1C/FAM98A/RCC2/EVL/KANK1/INPP5K/BAG4/CYFIP1/DBNL/PLEKHM1/SH3YL1/ARF6/HRAS	16
medium	GO:0043550	regulation of lipid kinase activity	16/2299	71/21069	0.00357083	0.041787	0.035189	PPP2R5A/RUBCN/PIK3R2/PIP4K2C/AMBRA1/PIP4K2B/SOCS5/PTK2/PIK3R1/WDR81/SOCS2/RBL2/FLT1/WDR91/SOCS4/CISH	16
medium	GO:0038179	neurotrophin signaling pathway	11/2299	41/21069	0.00361393	0.0421275	0.0354758	DDIT4/SPRY2/PTPN11/KIDINS220/BCAR1/RAPGEF2/CYFIP1/ZFYVE27/ZDHHC17/RAF1/RAP1A	11
medium	GO:0045444	fat cell differentiation	45/2299	275/21069	0.00367763	0.0427872	0.0360313	HES1/NIPBL/AKT2/SAV1/DUSP10/PER2/CTBP2/ZFP36L2/CREB1/TRIO/PIAS1/LRP5/OSBPL11/CBY1/ATAT1/BBS12/BBS4/WWTR1/SREBF1/TFE3/TMEM64/CREBL2/NR1D1/FTO/BMAL1/HDAC6/ERAP1/NAPEPLD/MEX3C/BBS2/ERO1A/PPARD/ASXL2/ID2/ZBTB7B/TCF7L2/TBL1XR1/ZFP36L1/STK3/ASXL1/DDIT3/FOXO1/CEBPD/ARID5B/GPX1	45
medium	GO:1901264	carbohydrate derivative transport	18/2299	84/21069	0.00370233	0.0429085	0.0361335	SLC25A19/GLTP/SLC35A2/CD47/SLC25A24/SLC35D1/SLC25A17/SLC35B3/SLC25A25/LRRC8A/SLC35A1/G6PC3/ABCC5/ABCD1/RALBP1/PSAP/RSC1A1/SLC29A3	18
medium	GO:0097178	ruffle assembly	14/2299	59/21069	0.00379539	0.0437245	0.0368207	EPS8/CORO1C/FAM98A/RCC2/EVL/KANK1/INPP5K/BAG4/CYFIP1/DBNL/PLEKHM1/SH3YL1/ARF6/HRAS	14
medium	GO:0046390	ribose phosphate biosynthetic process	44/2299	268/21069	0.00379902	0.0437245	0.0368207	IMPDH1/ATP5F1D/PARP1/NDUFB5/ATP6V1A/PRKAG2/NDUFA10/MLYCD/NME1/DCAKD/PANK2/PDK2/DNAJC30/SLC35B3/PAICS/TECR/NDUFB3/PAPSS1/AMPD2/ENO1/UMPS/ADSS2/UCKL1/ACSF3/SDHD/NME3/ADCY9/PDK1/CTPS2/ACSL3/CAD/NDUFC2/PDHX/RFK/G6PD/CMPK1/NDUFB9/NDUFV3/SLC25A16/PRPSAP1/NME2/ANTKMT/NDUFB11/NDUFA7	44
medium	GO:0044843	cell cycle G1/S phase transition	48/2299	298/21069	0.00380182	0.0437245	0.0368207	HYAL1/TP53/ADAM17/CDK17/MEN1/CDK2AP2/FBXO31/ACTL6A/RCC1/PHF10/CDK2/AMBRA1/APPL1/SMARCA2/TRIM39/CDK5/KMT2E/EIF4E/SMARCB1/NPAT/CDKN2C/ACVR1/E2F4/PHB2/ACVR1B/DDRGK1/BID/LATS2/SMARCC2/PBRM1/HINFP/ITGB1/RBL2/CDC7/CTDSP2/METTL13/CASP2/CUL4B/APC/SMARCA4/SMARCD2/ID2/PSME1/CACUL1/ACTB/DCUN1D3/CDK10/KLF11	48
medium	GO:0006790	sulfur compound metabolic process	56/2299	359/21069	0.00384631	0.0440118	0.0370626	SLC25A19/TPST1/HYAL1/FXN/GLCE/NDST1/CIAPIN1/SP1/GSS/BPNT1/MLYCD/CHST14/GLRX3/EXT1/DLST/MCCC1/IDUA/OXSM/CSAD/GCLM/PDK2/SLC35B3/MTRR/STAT5A/SUCLG2/STAT5B/TPST2/ACOT9/HSPA9/TECR/MMS19/PAPSS1/ENOPH1/BPNT2/ACSF3/PDK1/ACSL3/GNS/B3GNT2/PDHX/NFE2L2/G6PD/EXT2/SLC19A2/ABCD1/MTHFR/CHST12/MGST2/DGAT1/MPST/LYRM4/ABHD14B/B3GALT6/NDOR1/ICMT/GPX1	56
medium	GO:0060155	platelet dense granule organization	8/2299	25/21069	0.00389632	0.0443032	0.0373079	HPS3/AP3B1/HPS5/BLOC1S3/BLOC1S2/AP1M1/HPS1/AP1S1	8
medium	GO:0051351	positive regulation of ligase activity	5/2299	11/21069	0.00404012	0.0454231	0.038251	GCLM/XRCC1/XRCC4/NHEJ1/ANTKMT	5
medium	GO:0000082	G1/S transition of mitotic cell cycle	43/2299	262/21069	0.0042089	0.0471444	0.0397006	HYAL1/TP53/ADAM17/CDK17/CDK2AP2/FBXO31/ACTL6A/RCC1/PHF10/CDK2/AMBRA1/APPL1/SMARCA2/CDK5/KMT2E/EIF4E/SMARCB1/NPAT/CDKN2C/ACVR1/E2F4/ACVR1B/BID/LATS2/SMARCC2/PBRM1/HINFP/ITGB1/RBL2/CDC7/CTDSP2/CASP2/CUL4B/APC/SMARCA4/SMARCD2/ID2/PSME1/CACUL1/ACTB/DCUN1D3/CDK10/KLF11	43
medium	GO:0042254	ribosome biogenesis	53/2299	338/21069	0.00433089	0.0480747	0.0404839	SIRT7/PINX1/RRP8/GAR1/MTERF3/ERCC2/FBL/WDR75/NOL6/TSR1/PWP1/EXOSC9/UTP4/METTL17/ESF1/NGDN/PDCD11/BYSL/DDX52/MTREX/EIF6/XRN2/NUP88/DIMT1/EXOSC8/URB1/TMA16/XPO1/RPS24/MTG2/DDX21/RSL1D1/EXOSC4/NOP2/RPS8/WDR12/DHX30/RPS5/NPM3/NAT10/RPLP0/DROSHA/CUL4B/NUDT16/DIS3/UTP18/ZNHIT6/NOP53/CHD7/GTPBP10/HEATR1/C1D/EXOSC6	53
medium	GO:0015980	energy derivation by oxidation of organic compounds	56/2299	361/21069	0.00433192	0.0480747	0.0404839	UGP2/ATP5F1D/ACO1/RB1CC1/TP53/FXN/AKT2/PER2/SIRT3/ARL2/NDUFB5/MSH2/PRKAG2/SLC25A33/NDUFA10/PRELID1/PGM2/DLST/DYRK2/PANK2/MTFR1/PNPT1/DNAJC30/PIK3CA/SUCLG2/C2orf69/INPP5K/SLC25A25/PLEC/IRS2/NR1D1/ETFA/INSR/NDUFB3/BID/GBA1/COX10/PDE12/STK40/SDHD/NDUFC2/POLG2/NDUFB9/ABCD1/NOP53/NDUFV3/FH/MTFR1L/EPM2AIP1/ETFRF1/GHITM/GBE1/GSK3B/ANTKMT/NDUFB11/NDUFA7	56
medium	GO:0120163	negative regulation of cold-induced thermogenesis	12/2299	48/21069	0.00454402	0.0499067	0.0420267	ADAM17/LGR4/ARRDC3/TFE3/IP6K1/NR1D1/BMAL1/TLE3/ID1/ACOT13/NOTCH1/DDIT3	12
medium	GO:0060324	face development	13/2299	54/21069	0.00454677	0.0499067	0.0420267	NIPBL/PTPN11/CSRNP1/PLEKHA1/BBS4/ZFAND5/TIPARP/RARA/SRF/MAPK3/CHD7/RAF1/ARID5B	13
low	GO:0034470	ncRNA processing	101/1083	489/21069	3.73255e-34	1.50422e-30	1.31464e-30	TARBP2/MTERF4/DDX49/METTL25B/RPL14/POP4/UTP11/WDR18/MRM2/NOL10/RPUSD2/DPH3/RRP1/GTPBP3/POP5/ELAC1/TSN/ZCCHC8/NHP2/INTS11/RPF1/NCBP2/NCBP1/MRM1/PA2G4/INTS5/INTS4/DDX56/PUM2/MRPL44/KRR1/RIOK2/TRMT5/TUT1/DDX54/MRTO4/AGO1/C2orf49/EXOSC1/PUS1/NCOR1/AARS2/TRIT1/TSR3/SRFBP1/PUS3/WDR55/METTL3/NSUN2/YTHDF2/TRMT13/NOL11/EIF4A3/RPP25L/RRP7A/WDR46/MTO1/SNIP1/DDX51/METTL16/BCDIN3D/FARS2/PARN/CDK5RAP1/NOL8/TRM…	101
low	GO:0140053	mitochondrial gene expression	59/1083	176/21069	2.1874e-32	4.40762e-29	3.85213e-29	MRPS30/MTERF4/MRPL9/MRPS26/DAP3/MRPL18/SARS2/MRPL10/MRPS27/MRPL43/MRPL58/MRPL20/AURKAIP1/WARS2/MRPL49/MRPS9/THAP11/PTCD3/MRPL54/MRPL50/MTRF1L/TACO1/MTERF2/FASTKD1/MRPL44/RCC1L/TRMT5/MTRF1/CHCHD1/PUS1/AARS2/TRIT1/MRPL34/GADD45GIP1/MRPS10/MTIF2/MRPS7/MRPL28/MTO1/QRSL1/TEFM/CDK5RAP1/HARS1/MRPL22/TRNT1/MRPL46/MRPS11/PTCD1/MTIF3/MTRES1/TRMT10C/MRPS21/MRPL45/MPV17L2/MRPS34/TFB1M/MTERF1/FASTKD5/TRMT61B	59
low	GO:0032543	mitochondrial translation	44/1083	142/21069	6.91914e-23	9.29471e-20	8.12331e-20	MRPS30/MRPL9/MRPS26/DAP3/MRPL18/SARS2/MRPL10/MRPS27/MRPL43/MRPL58/MRPL20/AURKAIP1/WARS2/MRPL49/MRPS9/PTCD3/MRPL54/MRPL50/MTRF1L/TACO1/MRPL44/RCC1L/MTRF1/CHCHD1/AARS2/MRPL34/GADD45GIP1/MRPS10/MTIF2/MRPS7/MRPL28/QRSL1/CDK5RAP1/HARS1/MRPL22/MRPL46/MRPS11/PTCD1/MTIF3/TRMT10C/MRPS21/MRPL45/MPV17L2/MRPS34	44
low	GO:0042254	ribosome biogenesis	66/1083	338/21069	3.23144e-21	3.25568e-18	2.84537e-18	GRWD1/MTERF4/DDX49/RSL24D1/METTL25B/RPL14/POP4/UTP11/WDR18/MRM2/NOL10/RPUSD2/RRP1/MRPL20/POP5/NHP2/RPF1/EIF2A/MRM1/PA2G4/DDX56/NOP16/MRPL44/KRR1/RIOK2/DDX54/MRTO4/GTF3A/EXOSC1/TSR3/SRFBP1/WDR55/ERAL1/YTHDF2/NOL11/EIF4A3/MRPS7/NOM1/ZNF622/RRP7A/HEATR3/WDR46/DDX51/METTL16/SPATA5L1/NOL8/PAK1IP1/EXOSC3/TRAF7/NLE1/BRIX1/MRPL22/DDX47/REXO4/MRPS11/NOB1/UTP25/FTSJ3/METTL18/MPV17L2/METTL5/TFB1M/MAK16/RBFA…	66
low	GO:0048193	Golgi vesicle transport	57/1083	328/21069	4.44e-16	1.4911e-13	1.30318e-13	RAB10/AP3S2/HTT/COG8/BET1L/YIPF6/SNX1/TEX261/SEC24C/RAB33B/TRAPPC5/YIF1A/PHAF1/SYS1/COPZ1/TMED10/TRAPPC3/SCAMP2/GBF1/COG1/EXOC8/SEC22C/ARCN1/TRAPPC10/ARFRP1/SNX12/PPP6C/TRAPPC12/AP3D1/RER1/STX5/ARFGAP2/TMED4/ERGIC2/ARL1/SCAMP3/COG4/COPG1/RABIF/COPB2/VCP/VPS51/GGA3/USO1/VAPB/RAB14/COG3/SNX3/TRAPPC2L/COMMD1/CSNK1D/COG2/GOLPH3/YIPF4/TMED7/PDCD6/TRAPPC1	57
low	GO:0072594	establishment of protein localization to organelle	67/1083	482/21069	1.05469e-13	3.036e-11	2.65337e-11	HGS/ELAVL1/MTERF4/RAB10/WRAP53/PMPCA/VPS4A/TOMM40/ZPR1/NABP2/TCP1/BCS1L/VPS11/PEX6/RNF31/DMAP1/NMT1/NUTF2/SPCS2/RALA/MTX2/PPP1R10/LAMP2/CCT6A/EIF4ENIF1/AP3D1/SRP68/PEX10/TIMM21/TOMM22/NPEPPS/PEX26/GET3/CCT7/SRP19/UBE2L3/PEX14/TIMM13/IPO8/TOMM70/OXA1L/SGTA/CHCHD4/GGA3/SEC63/HEATR3/HERPUD1/HDAC3/SNF8/TRMT10B/MAIP1/AGK/NCOA4/PEX12/VPS25/BECN1/HTRA2/TSC2/MAPK14/SIRT4/AP3M1/TIMM10/ING1/IPO7/SRPRB/TIMM…	67
low	GO:1903311	regulation of mRNA metabolic process	53/1083	332/21069	1.7263e-13	4.63798e-11	4.05347e-11	SFSWAP/ELAVL1/SF1/HNRNPL/TRA2B/DYRK1A/SAFB2/CELF1/U2AF2/CDK9/CASC3/HNRNPU/NCBP2/EIF4ENIF1/SUPT6H/NCBP1/GTPBP1/YTHDF1/FASTKD1/PUM2/KHDRBS1/RBM42/SRRM1/LARP4B/METTL14/METTL3/YTHDF2/EIF4A3/CDC73/METTL16/CNOT7/PARN/SRSF2/YTHDF3/EXOSC3/PUM1/JMJD6/NSRP1/SMU1/DAZAP1/ZBTB7A/PAF1/HSF1/MAPK14/KHSRP/IWS1/THRAP3/ALKBH5/RBM4/PUF60/RBM23/EXOSC2/FASTKD5	53
low	GO:0016236	macroautophagy	51/1083	350/21069	1.69017e-11	3.63677e-09	3.17843e-09	ATP6V1G1/HGS/ATG101/HTT/UBQLN4/NBR1/VPS4A/VPS35/RAB33B/ATG16L1/UBA5/ATG5/RNF31/VTA1/EXOC8/NSFL1C/LAMP2/PGAM5/EXOC7/IFT20/TBC1D25/ZFYVE1/CDC37/CHMP5/SNAPIN/RETREG2/ULK1/PLAA/CHMP3/CHMP2A/ZFYVE26/UBQLN1/VPS26B/PHF23/GABARAP/VCP/ATG4B/WAC/SNF8/WDR24/USP30/VPS25/BECN1/HTRA2/TSC2/EMC6/RNF5/VPS39/CHMP1A/CHMP6/TOM1	51
low	GO:0051205	protein insertion into membrane	22/1083	79/21069	4.21648e-11	7.72382e-09	6.7504e-09	TOMM40/BCS1L/EMC3/NMT1/WDR83OS/EMC4/MTX2/TOMM22/CCDC47/GET3/TIMM13/TOMM70/OXA1L/SGTA/EMC8/TRMT10B/MAIP1/AGK/CAMLG/TIMM10/EMC6/TIMM29	22
low	GO:0034243	regulation of transcription elongation by RNA polymerase II	24/1083	96/21069	6.74075e-11	1.1811e-08	1.03224e-08	MED19/ZMYND11/MED18/EAPP/CDK9/HNRNPU/INTS11/RNF8/NCBP2/SUPT6H/NCBP1/PWWP2A/INTS5/INTS4/AXIN1/CDC73/NELFA/CCNK/MED4/MED29/MED24/NELFB/MED16/MED7	24
low	GO:0071826	ribonucleoprotein complex subunit organization	43/1083	276/21069	7.58112e-11	1.22208e-08	1.06806e-08	TARBP2/SFSWAP/SF1/AAR2/EIF3D/MRM2/CELF1/EIF3A/MRPL20/PHF5A/EIF4B/EIF3B/PRPF31/DHX8/CRNKL1/NCBP1/SF3B5/GEMIN8/USP39/MRTO4/AGO1/TFIP11/DNAJC17/TXNL4A/EIF3I/SRSF1/VCP/CD2BP2/ERAL1/MRPS7/RRP7A/CDC73/SNIP1/LUC7L2/TRAF7/NLE1/BRIX1/MRPS11/DDX23/SNRPC/ISY1/PUF60/EIF4H	43
low	GO:0016050	vesicle organization	51/1083	368/21069	1.08627e-10	1.68372e-08	1.47153e-08	HGS/AP3S2/VPS4A/SEC24C/TRAPPC5/VPS11/TMED10/TRAPPC3/VTA1/GBF1/EXOC8/TRAPPC10/PPP6C/TRAPPC12/AP3D1/STX5/ARFGAP2/VPS18/BLOC1S6/CHMP5/SNAPIN/RNF26/SNX19/CHMP3/CHMP2A/RAB5B/MFSD14A/STX10/USO1/VAPB/RAB14/RAB22A/SNX3/SNF8/TRAPPC2L/IST1/VPS25/CSNK1D/SNX11/OSBP/TGFBRAP1/AP3M1/VPS39/GOLPH3/YIPF4/CHMP1A/CHMP6/BLOC1S5/TOM1/PDCD6/TRAPPC1	51
low	GO:0000209	protein polyubiquitination	42/1083	271/21069	1.49066e-10	2.22495e-08	1.94454e-08	TRIM27/UBE2H/UBE3B/FBXO22/RNF40/AMFR/OTUB1/UBE2D2/RNF31/SPOP/UBE2Q1/UBE3C/RNF115/RNF8/RNF20/UBE4B/GPS2/TMEM129/NPEPPS/SHARPIN/RNF26/PLAA/UBE2L3/RNF126/GABARAP/FBXW11/AXIN1/ANAPC7/STUB1/UBE4A/CDC16/UBE2K/MUL1/RNF166/PPIL2/RNF5/RNF4/ANKRD39/TRAF6/UBE2G2/UBE2R2/UBE2E1	42
low	GO:0006605	protein targeting	48/1083	349/21069	5.00272e-10	7.20035e-08	6.2929e-08	HGS/MTERF4/PMPCA/VPS4A/TOMM40/ZDHHC7/VPS11/PEX6/RNF31/SPCS2/MTX2/OS9/LAMP2/SYNJ2BP/AP3D1/SRP68/PEX10/ZDHHC4/TIMM21/TOMM22/NPEPPS/CDC37/PEX26/GET3/SRP19/UBE2L3/PEX14/TIMM13/TOMM70/GABARAP/SGTA/CHCHD4/GGA3/SEC63/HERPUD1/TAOK2/MIEF1/TRMT10B/AGK/NCOA4/PEX12/BECN1/HTRA2/SIRT4/AP3M1/TIMM10/SRPRB/TIMM29	48
low	GO:0006401	RNA catabolic process	47/1083	339/21069	5.79378e-10	8.05136e-08	7.03666e-08	DIS3L/ELAVL1/DDX49/CELF1/ZPR1/PELO/GSPT1/PPP1R8/MTPAP/RNASEH2C/SKIC2/DXO/ZCCHC8/CASC3/HNRNPU/SMG7/NCBP2/EIF4ENIF1/NCBP1/GTPBP1/YTHDF1/SND1/FASTKD1/PUM2/ETF1/TRIR/MRTO4/AGO1/EXOSC1/LARP4B/METTL14/METTL3/NSUN2/YTHDF2/EIF4A3/METTL16/CNOT7/PARN/YTHDF3/EXOSC3/PUM1/MAPK14/KHSRP/THRAP3/ALKBH5/EXOSC2/FASTKD5	47
low	GO:0051650	establishment of vesicle localization	34/1083	210/21069	2.6386e-09	3.03816e-07	2.65527e-07	HGS/AP3S2/HTT/VPS4A/COPS5/TRAPPC5/TMED10/TRAPPC3/GBF1/EXOC8/TRAPPC10/EXOC7/PPP6C/EXOC3/TRAPPC12/AP3D1/ARFGAP2/STK11/BLOC1S6/SNAPIN/CHMP2A/TBC1D23/FBXW11/DYNC1H1/SNF8/TRAPPC2L/CSNK1D/TOR1A/C17orf75/AP3M1/MKKS/BLOC1S5/PDCD6/TRAPPC1	34
low	GO:0022618	ribonucleoprotein complex assembly	39/1083	268/21069	4.26219e-09	4.77129e-07	4.16997e-07	TARBP2/SFSWAP/SF1/AAR2/EIF3D/MRM2/CELF1/EIF3A/MRPL20/PHF5A/EIF4B/EIF3B/PRPF31/CRNKL1/NCBP1/SF3B5/GEMIN8/USP39/MRTO4/AGO1/TXNL4A/EIF3I/SRSF1/CD2BP2/ERAL1/MRPS7/RRP7A/CDC73/SNIP1/LUC7L2/TRAF7/NLE1/BRIX1/MRPS11/DDX23/SNRPC/ISY1/PUF60/EIF4H	39
low	GO:0036503	ERAD pathway	25/1083	127/21069	5.95081e-09	6.14917e-07	5.3742e-07	AMFR/UBAC2/OS9/SEL1L/UBE4B/TMEM129/TMEM259/CCDC47/RNF121/FBXO6/UBQLN1/VCP/SGTA/CALR/HERPUD1/STUB1/TMUB2/UBE4A/TOR1A/ANKZF1/DERL1/RNF103/RNF5/UBE2G2/CANX	25
low	GO:0051648	vesicle localization	35/1083	228/21069	6.49543e-09	6.54415e-07	5.7194e-07	HGS/AP3S2/HTT/VPS4A/COPS5/TRAPPC5/TMED10/TRAPPC3/GBF1/EXOC8/TRAPPC10/EXOC7/PPP6C/EXOC3/TRAPPC12/AP3D1/ARFGAP2/STK11/BLOC1S6/SNAPIN/CHMP2A/TBC1D23/FBXW11/DYNC1H1/USO1/SNF8/TRAPPC2L/CSNK1D/TOR1A/C17orf75/AP3M1/MKKS/BLOC1S5/PDCD6/TRAPPC1	35
low	GO:0032259	methylation	51/1083	422/21069	1.30119e-08	1.24852e-06	1.09117e-06	KMT5A/ASH2L/METTL25B/SETD1A/MRM2/GSPT1/GTPBP3/CHTOP/DMAP1/NCOA6/SUPT6H/RNF20/PCIF1/MRM1/PAGR1/ETF1/TRMT5/EHMT1/ZNF274/CTCF/METTL14/KMT2D/METTL3/NSUN2/TRMT13/RBBP5/MTO1/METTL16/PCMTD1/BCDIN3D/ATPSCKMT/NELFA/SETD4/TRMT10B/TRMT2A/TRMT12/PAF1/FTSJ3/IWS1/METTL18/NFYC/TRMT10C/METTL5/TRMT61A/PCMTD2/TFB1M/MBD3/METTL23/ASMTL/WDR5/TRMT61B	51
low	GO:0097352	autophagosome maturation	16/1083	61/21069	4.83995e-08	3.76156e-06	3.28749e-06	UBQLN4/VPS4A/ATG5/LAMP2/TBC1D25/CHMP5/SNAPIN/CHMP3/CHMP2A/UBQLN1/PHF23/VCP/BECN1/CHMP1A/CHMP6/TOM1	16
low	GO:0034976	response to endoplasmic reticulum stress	39/1083	295/21069	6.23203e-08	4.7387e-06	4.14149e-06	TBL2/CREBZF/COPS5/NR1H2/AMFR/UBA5/UBAC2/OS9/SEL1L/FLOT1/TMCO1/UBE4B/TMEM129/TMEM259/EIF2B5/CCDC47/NRBF2/EIF4G1/GORASP2/RNF121/FBXO6/UBQLN1/VCP/SGTA/CALR/NCK2/HERPUD1/VAPB/QRICH1/STUB1/TMUB2/UBE4A/TOR1A/ANKZF1/DERL1/RNF103/RNF5/UBE2G2/CANX	39
low	GO:0090151	establishment of protein localization to mitochondrial membrane	13/1083	41/21069	7.46527e-08	5.5713e-06	4.86916e-06	TOMM40/BCS1L/NMT1/MTX2/TOMM22/TIMM13/TOMM70/OXA1L/TRMT10B/MAIP1/AGK/TIMM10/TIMM29	13
low	GO:1903008	organelle disassembly	25/1083	145/21069	9.41046e-08	6.76714e-06	5.91429e-06	HTT/ASCC2/PELO/UBA5/ATG5/KAT5/GBF1/MARK2/STX5/SLC25A46/CDC37/RETREG2/ULK1/TRIP4/GABARAP/VCP/ATG4B/MTIF2/RRP7A/USP30/BECN1/HTRA2/MTIF3/TSC2/MUL1	25
low	GO:0033523	histone H2B ubiquitination	7/1083	10/21069	9.73931e-08	6.76714e-06	5.91429e-06	RNF40/RNF8/RNF20/CDC73/WAC/PAF1/UBE2E1	7
low	GO:0043162	ubiquitin-dependent protein catabolic process via the multivesicular body sorting pathway	12/1083	38/21069	2.50053e-07	1.52684e-05	1.33441e-05	HGS/VPS4A/RNF115/CHMP5/PLAA/CHMP3/CHMP2A/RNF126/SNF8/VPS25/CHMP1A/CHMP6	12
low	GO:0090148	membrane fission	13/1083	46/21069	3.39181e-07	1.98102e-05	1.73135e-05	HGS/VPS4A/EXOC8/EXOC7/EXOC3/SLC25A46/CHMP5/CHMP3/CHMP2A/SNF8/VPS25/CHMP1A/CHMP6	13
low	GO:0036258	multivesicular body assembly	11/1083	33/21069	4.28102e-07	2.39618e-05	2.09419e-05	HGS/VPS4A/VTA1/CHMP5/CHMP3/CHMP2A/SNF8/IST1/VPS25/CHMP1A/CHMP6	11
low	GO:0140694	non-membrane-bounded organelle assembly	48/1083	436/21069	5.85081e-07	3.18632e-05	2.78475e-05	LSM14A/TUBGCP6/MTERF4/OGFOD1/RBM14/MRM2/MRPL20/BCCIP/TUBGCP2/HNRNPU/TRAPPC12/EIF4ENIF1/DDX6/EIF2A/YTHDF1/ZFYVE1/PUM2/MRTO4/CHMP5/NCOR1/CHMP3/CHMP2A/G3BP2/ERAL1/YTHDF2/MRPS7/RRP7A/DYNC1H1/NEK7/HDAC3/CNOT7/YTHDF3/TRAF7/NLE1/BRIX1/MRPL22/MRPS11/CSNK1D/G3BP1/MIS12/ABRAXAS2/MPV17L2/PPP1R35/RNF4/CHMP1A/CHMP6/TUBGCP3/NUP62	48
low	GO:0018205	peptidyl-lysine modification	49/1083	457/21069	9.7232e-07	4.96006e-05	4.33495e-05	KMT5A/POLE3/PIAS4/TRIM27/ASH2L/GLYR1/MLLT1/SETD1A/SUPT7L/BAZ1B/DOHH/ATG5/KAT5/DMAP1/DHPS/NCOA6/CTBP1/USP22/SUPT6H/ING5/TAF6L/SF3B5/SPHK2/PWWP2A/MSL1/PAGR1/EHMT1/ZNF274/CTCF/KMT2D/RBBP5/ING4/SUMO3/ATPSCKMT/NELFA/VPS72/SETD4/KAT14/JMJD6/MUL1/SIRT4/IWS1/MED24/METTL18/NFYC/TAF6/MBD3/WDR5/TAF4	49
low	GO:0031929	TOR signaling	22/1083	133/21069	1.13548e-06	5.64937e-05	4.93738e-05	MEAK7/RPTOR/SYAP1/TTI1/OTUD5/TIPRL/LAMTOR3/RPS6KB2/MAPKAPK5/MLST8/STK11/FBXO9/NPRL3/RPS6KB1/TBC1D7/HDAC3/WAC/WDR24/TSC2/KPTN/GOLPH3/PDCD6	22
low	GO:0016573	histone acetylation	27/1083	189/21069	1.45267e-06	7.10381e-05	6.20853e-05	POLE3/GLYR1/MLLT1/SUPT7L/BAZ1B/ATG5/KAT5/DMAP1/CTBP1/USP22/ING5/TAF6L/SF3B5/SPHK2/PWWP2A/MSL1/CTCF/ING4/VPS72/KAT14/IWS1/MED24/NFYC/TAF6/MBD3/WDR5/TAF4	27
low	GO:1902774	late endosome to lysosome transport	9/1083	24/21069	1.57219e-06	7.1999e-05	6.29251e-05	VPS4A/VPS35/CHMP5/SNAPIN/CHMP3/CHMP2A/VPS39/CHMP1A/CHMP6	9
low	GO:0042176	regulation of protein catabolic process	45/1083	415/21069	1.97913e-06	8.66174e-05	7.57012e-05	HGS/UBQLN4/SNX1/VPS35/FBXO22/RNF40/HSPBP1/VPS11/CCAR2/PSMD2/RCHY1/SNX12/AZIN1/PSMC4/STX5/TMEM259/RGP1/UCHL5/UBQLN1/GABARAP/VCP/SGTA/OAZ2/GGA3/AXIN1/HERPUD1/RHBDD3/EGLN2/WAC/OAZ1/SNX3/SNF8/STUB1/NUDT15/COMMD1/PSME3/CSNK1D/DEDD/UBE2K/PSMD3/CAMLG/DDB1/BANP/CHMP6/PSMC2	45
low	GO:0034250	positive regulation of cellular amide metabolic process	27/1083	192/21069	1.97962e-06	8.66174e-05	7.57012e-05	TARBP2/ELAVL1/HNRNPL/MRPS27/EIF3D/HNRNPU/RPS6KB2/SPHK2/PCIF1/YTHDF1/EIF2B5/RCC1L/KHDRBS1/EIF4G1/LARP4B/METTL14/METTL3/NCK2/YTHDF2/EIF4A3/RPS6KB1/CDK5RAP1/YTHDF3/TRMT10C/MPV17L2/METTL5/RBM4	27
low	GO:0008535	respiratory chain complex IV assembly	10/1083	31/21069	2.03576e-06	8.66174e-05	7.57012e-05	BCS1L/TMEM223/SLC25A46/TIMM21/TACO1/COA1/COA5/COX20/COX15/COA4	10
low	GO:0034063	stress granule assembly	10/1083	31/21069	2.03576e-06	8.66174e-05	7.57012e-05	LSM14A/OGFOD1/DDX6/YTHDF1/PUM2/G3BP2/YTHDF2/DYNC1H1/YTHDF3/G3BP1	10
low	GO:0006403	RNA localization	30/1083	227/21069	2.04185e-06	8.66174e-05	7.57012e-05	WRAP53/MRPL18/TCP1/DDX19A/CHTOP/CASC3/NHP2/NUTF2/HNRNPU/SMG7/CCT6A/NCBP2/SUPT6H/NCBP1/FLOT1/KHDRBS1/CCT7/FUBP3/G3BP2/SRSF1/NSUN2/EIF4A3/NCBP3/PARN/HSF1/YY1/KHSRP/IWS1/ALKBH5/NUP62	30
low	GO:2001020	regulation of response to DNA damage stimulus	40/1083	351/21069	2.14279e-06	8.90253e-05	7.78055e-05	KMT5A/ZNHIT1/PIAS4/WRAP53/UBQLN4/DYRK1A/CYREN/TMEM161A/ARID1B/SUPT7L/OTUB1/TTI1/CDK9/INO80E/BAZ1B/CCAR2/KAT5/DMAP1/WRNIP1/PPP1R10/TFPT/RNF8/FEM1B/USP22/TAF6L/SF3B5/ACTR8/TFIP11/BABAM1/UCHL5/ING4/ERCC1/VPS72/SPRED2/BCL7B/HSF1/YY1/ERCC4/TAF6/TAF4	40
low	GO:1905214	regulation of RNA binding	7/1083	14/21069	2.32119e-06	9.54532e-05	8.34233e-05	HNRNPL/EIF3D/CDK9/NUCKS1/NCBP1/EIF4G1/EIF4A3	7
low	GO:0007030	Golgi organization	26/1083	183/21069	2.50896e-06	0.000101349	8.85764e-05	HTT/COG8/RAB33B/TMED10/GBF1/COG1/NSFL1C/TRAPPC12/STX5/STK25/TMED4/TJAP1/ARL1/COG4/ARMH3/GORASP2/VPS51/ATL2/USO1/COG3/CSNK1D/COG2/MAP2K2/GOLPH3/YIPF4/TMED7	26
low	GO:0006302	double-strand break repair	37/1083	315/21069	2.51487e-06	0.000101349	8.85764e-05	PIAS4/WRAP53/UBQLN4/CYREN/ARID1B/NABP2/POLL/SMARCAL1/OTUB1/KAT5/DMAP1/RAD21/NUCKS1/SWSAP1/RNF8/AP5S1/ACTR8/TFIP11/BABAM1/NBN/HUS1/ZFYVE26/VCP/LIG4/TOP3A/ERCC1/VPS72/RAD51D/ZBTB7A/MARF1/BCL7B/HSF1/YY1/MUS81/ERCC4/KDM2A/MTA1	37
low	GO:0042255	ribosome assembly	14/1083	63/21069	2.90874e-06	0.000116062	0.000101435	MTERF4/MRM2/MRPL20/EIF2A/MRTO4/ERAL1/MRPS7/RRP7A/TRAF7/NLE1/BRIX1/MRPL22/MRPS11/MPV17L2	14
low	GO:1904896	ESCRT complex disassembly	6/1083	10/21069	3.19643e-06	0.000125064	0.000109302	VPS4A/VTA1/CHMP5/CHMP2A/IST1/CHMP1A	6
low	GO:1904903	ESCRT III complex disassembly	6/1083	10/21069	3.19643e-06	0.000125064	0.000109302	VPS4A/VTA1/CHMP5/CHMP2A/IST1/CHMP1A	6
low	GO:0033044	regulation of chromosome organization	34/1083	287/21069	5.26569e-06	0.000198324	0.00017333	ARID1B/NABP2/TCP1/INO80E/BAZ1B/KAT5/PPP1R10/RAD21/HNRNPU/TFPT/CCT6A/TRAPPC12/MAPKAPK5/ACTR8/RIOK2/INO80C/CCT7/NBN/UCHL5/CTCF/DYNC1LI1/LIG4/ANAPC7/NEK7/ERCC1/PARN/BECN1/CDC16/MAP3K4/BCL7B/YY1/ERCC4/RNF4/MNAT1	34
low	GO:0006839	mitochondrial transport	28/1083	214/21069	5.38065e-06	0.000200778	0.000175474	MTERF4/PMPCA/TOMM40/VPS35/BCS1L/RHOT2/VPS11/RNF31/NMT1/MTX2/SLC25A46/TIMM21/TOMM22/NPEPPS/UBE2L3/TIMM13/TOMM70/OXA1L/CHCHD4/TRMT10B/MAIP1/AGK/HTRA2/MUL1/SIRT4/TIMM10/SLC25A32/TIMM29	28
low	GO:0070918	small regulatory ncRNA processing	14/1083	69/21069	9.01828e-06	0.000321625	0.000281091	TARBP2/TSN/NCBP2/NCBP1/PUM2/AGO1/NCOR1/METTL3/SNIP1/BCDIN3D/PUM1/DGCR8/MAP2K2/NCOR2	14
low	GO:0007033	vacuole organization	29/1083	235/21069	1.16491e-05	0.000408224	0.000356776	ATG101/VPS4A/VPS35/RAB33B/ATG16L1/VPS11/ATG5/CLN6/NSFL1C/IFT20/TMEM199/VPS18/CHMP5/SNAPIN/ULK1/CHMP3/CHMP2A/ZFYVE26/UBQLN1/PHF23/GABARAP/ATG4B/RAB14/BECN1/EMC6/RNF5/CHMP1A/CHMP6/TOM1	29
low	GO:0048208	COPII vesicle coating	9/1083	30/21069	1.30084e-05	0.000436865	0.000381808	TRAPPC5/TMED10/TRAPPC3/PPP6C/TRAPPC12/TRAPPC2L/CSNK1D/PDCD6/TRAPPC1	9
low	GO:0006282	regulation of DNA repair	28/1083	230/21069	2.10832e-05	0.000674328	0.000589343	PIAS4/WRAP53/UBQLN4/CYREN/TMEM161A/ARID1B/SUPT7L/OTUB1/CDK9/INO80E/KAT5/DMAP1/WRNIP1/TFPT/RNF8/USP22/TAF6L/SF3B5/ACTR8/TFIP11/BABAM1/UCHL5/VPS72/BCL7B/HSF1/YY1/TAF6/TAF4	28
low	GO:1903322	positive regulation of protein modification by small protein conjugation or removal	20/1083	138/21069	2.61928e-05	0.000793661	0.000693637	PIAS4/RNF40/HSPBP1/RCHY1/AIMP2/UBE2L3/UBQLN1/PHF23/GABARAP/VCP/AXIN1/TBC1D7/HDAC3/STUB1/COMMD1/DERL1/MUL1/TRAF6/PDCD6/MTA1	20
low	GO:0006490	oligosaccharide-lipid intermediate biosynthetic process	7/1083	19/21069	2.71551e-05	0.000798795	0.000698125	MPDU1/ALG2/DHDDS/DPAGT1/ALG11/RFT1/NUS1	7
low	GO:0046761	viral budding from plasma membrane	6/1083	14/21069	3.82432e-05	0.00108535	0.000948567	VPS4A/CHMP5/CHMP3/CHMP2A/CHMP1A/CHMP6	6
low	GO:0046755	viral budding	8/1083	28/21069	5.87035e-05	0.00160935	0.00140653	VPS4A/VTA1/CHMP5/CHMP3/CHMP2A/SNF8/CHMP1A/CHMP6	8
low	GO:0072384	organelle transport along microtubule	15/1083	92/21069	6.65465e-05	0.00178788	0.00156256	AP3S2/HTT/BORCS6/TMEM201/RHOT2/AP3D1/STK11/BLOC1S6/SNAPIN/COPG1/PEX14/FBXW11/DYNC1H1/AP3M1/BLOC1S5	15
low	GO:1905216	positive regulation of RNA binding	5/1083	10/21069	7.21295e-05	0.00191238	0.00167137	HNRNPL/EIF3D/CDK9/NCBP1/EIF4G1	5
low	GO:0006338	chromatin remodeling	40/1083	411/21069	8.58095e-05	0.00213464	0.00186562	GRWD1/POLE3/ZNHIT1/SSRP1/MLLT1/ARID1B/SMARCAL1/TTI1/BAHD1/INO80E/BAZ1B/KAT5/DMAP1/BRD9/TFPT/RNF8/CTBP1/SUPT6H/TAF6L/SPHK2/BRD3/ACTR8/INO80C/PHF2/UCHL5/CTCF/MYSM1/KMT2D/KDM5C/KDM4B/HDAC5/AXIN1/VPS72/HP1BP3/ZBTB7A/BCL7B/YY1/NAP1L4/MBD3/MTA1	40
low	GO:0071763	nuclear membrane organization	10/1083	46/21069	9.26179e-05	0.00227592	0.00198908	VPS4A/NSFL1C/CHMP5/CHMP3/CHMP2A/TOR1A/EMD/CHMP1A/TOR1AIP1/CHMP6	10
low	GO:0044743	protein transmembrane import into intracellular organelle	9/1083	38/21069	0.000102246	0.00242937	0.0021232	TOMM40/PEX6/PEX10/TIMM21/PEX26/PEX14/TOMM70/CHCHD4/PEX12	9
low	GO:0000281	mitotic cytokinesis	14/1083	85/21069	0.000103066	0.00242937	0.0021232	VPS4A/EXOC8/EXOC7/EXOC3/STAMBP/CHMP5/CHMP3/CHMP2A/ZFYVE26/JTB/RAB35/CHMP1A/CHMP6/NUP62	14
low	GO:0031331	positive regulation of cellular catabolic process	45/1083	486/21069	0.00010377	0.00243135	0.00212493	ATG101/TRIM27/HTT/CELF1/FBXO22/RPTOR/HSPBP1/ATG16L1/KAT5/DXO/RNF31/RCHY1/HNRNPU/EIF4ENIF1/MLST8/GTPBP1/YTHDF1/STK11/ULK1/METTL14/UBQLN1/GABARAP/VCP/SGTA/METTL3/YTHDF2/NPRL3/AXIN1/HERPUD1/METTL16/CNOT7/PARN/WAC/YTHDF3/EXOSC3/PUM1/WDR24/STUB1/BECN1/CSNK1D/TSC2/HSF1/KHSRP/TOM1/EXOSC2	45
low	GO:0006260	DNA replication	32/1083	308/21069	0.000129756	0.00289125	0.00252687	GRWD1/POLE3/SSRP1/PPP2CA/WDR18/ZPR1/POLL/SMARCAL1/CDK9/INO80E/WRNIP1/TFPT/NUCKS1/POLG/ING5/E4F1/ACTR8/STOML2/MAP2K4/CIZ1/INO80C/NBN/UCHL5/KIN/LIG4/ING4/ATF1/ZNF830/YY1/MUS81/DDX23/RTF2	32
low	GO:0062125	regulation of mitochondrial gene expression	8/1083	31/21069	0.000129855	0.00289125	0.00252687	MRPS27/THAP11/TACO1/RCC1L/CDK5RAP1/MTRES1/TRMT10C/MPV17L2	8
low	GO:0006997	nucleus organization	19/1083	143/21069	0.000136306	0.00300171	0.00262341	SF1/WRAP53/VPS4A/ZPR1/KAT5/NSFL1C/CHMP5/PHF2/CHMP3/CHMP2A/POLR1B/LEMD2/MFSD14A/TOR1A/EMD/CHMP1A/TOR1AIP1/CHMP6/SELENOF	19
low	GO:0032386	regulation of intracellular transport	35/1083	354/21069	0.000171245	0.00357575	0.0031251	TM9SF4/VPS35/ZPR1/VPS11/UBAC2/RNF31/DMAP1/NMT1/OS9/SNX12/NCBP2/SUPT6H/NPEPPS/STK11/RIOK2/SNAPIN/KHDRBS1/UBE2L3/CHMP3/NSUN2/OAZ2/DYNC1H1/HDAC3/MIEF1/EIPR1/OAZ1/SNX3/HTRA2/MAPK14/IWS1/EMD/MAP2K2/RBM4/UBE2G2/NUS1	35
low	GO:0006497	protein lipidation	15/1083	100/21069	0.000175394	0.00364348	0.0031843	ATG101/ZDHHC5/PIGM/ZDHHC7/DPM2/ATG16L1/ATG5/NMT1/ZDHHC4/ZDHHC16/PIGB/ULK1/GPAA1/PIGK/PIGW	15
low	GO:0006457	protein folding	27/1083	247/21069	0.000186118	0.0038227	0.00334093	MPDU1/TCP1/HSPBP1/WDR83OS/NUDCD3/CCT6A/PDRG1/TTC1/CDC37/CCDC47/CCT7/NUDCD2/CALR/CHCHD4/PPID/BAG1/PFDN2/TOR1A/AHSA1/KHSRP/PPIL2/NFYC/PPIG/MKKS/PPIE/CANX/SELENOF	27
low	GO:0016445	somatic diversification of immunoglobulins	12/1083	69/21069	0.000186737	0.0038227	0.00334093	CYREN/POLL/PMS2/MSH3/RNF8/SUPT6H/SLC15A4/NBN/LIG4/ERCC1/EXOSC3/YY1	12
low	GO:0006488	dolichol-linked oligosaccharide biosynthetic process	6/1083	18/21069	0.00019794	0.00398849	0.00348583	MPDU1/ALG2/DHDDS/DPAGT1/RFT1/NUS1	6
low	GO:0031056	regulation of histone modification	23/1083	197/21069	0.000208888	0.00412657	0.0036065	GLYR1/C6orf89/OTUB1/CDK9/CHTOP/BAZ1B/ATG5/CTBP1/SUPT6H/RNF20/SPHK2/PWWP2A/SAP30BP/EHMT1/ZNF274/CTCF/NELFA/KAT14/PAF1/IWS1/NFYC/SKI/WDR5	23
low	GO:0031647	regulation of protein stability	36/1083	373/21069	0.000223532	0.00435186	0.0038034	HTT/VPS35/TCP1/TMEM183A/DPM2/TTI1/VPS11/CCAR2/PEX6/LAMP2/SEL1L/CCT6A/SWSAP1/CCNH/PDRG1/FLOT1/CDC37/CCT7/CALR/FBXW11/GGA3/CDC73/HDAC3/QRSL1/BAG1/COG3/DAD1/STUB1/PFDN2/DERL1/NCLN/POLR2E/MUL1/UTP25/CAMLG/RNF5	36
low	GO:0032200	telomere organization	24/1083	211/21069	0.000228871	0.00443329	0.00387457	WRAP53/NABP2/TCP1/SMARCAL1/INO80E/NHP2/PPP1R10/HNRNPU/TFPT/CCT6A/MAPKAPK5/ACTR8/TFIP11/CCT7/NBN/HUS1/UCHL5/NEK7/ERCC1/PARN/RAD51D/MAP3K4/YY1/ERCC4	24
low	GO:0009650	UV protection	5/1083	13/21069	0.000323553	0.00595397	0.0052036	XPA/SDF4/ERCC1/ERCC3/ERCC4	5
low	GO:0046831	regulation of RNA export from nucleus	5/1083	13/21069	0.000323553	0.00595397	0.0052036	NCBP2/SUPT6H/KHDRBS1/NSUN2/IWS1	5
low	GO:0007007	inner mitochondrial membrane organization	9/1083	44/21069	0.000336965	0.00614465	0.00537025	MTX2/SLC25A46/TIMM13/TOMM70/TRMT10B/MAIP1/AGK/TIMM10/TIMM29	9
low	GO:0051028	mRNA transport	18/1083	143/21069	0.000397591	0.0070276	0.00614192	DDX19A/CHTOP/CASC3/NUTF2/SMG7/NCBP2/SUPT6H/NCBP1/G3BP2/SRSF1/NSUN2/EIF4A3/NCBP3/HSF1/KHSRP/IWS1/ALKBH5/NUP62	18
low	GO:0006406	mRNA export from nucleus	12/1083	75/21069	0.000416981	0.00733814	0.00641333	DDX19A/CHTOP/CASC3/SMG7/NCBP2/SUPT6H/NCBP1/NSUN2/EIF4A3/NCBP3/IWS1/ALKBH5	12
low	GO:0090671	telomerase RNA localization to Cajal body	6/1083	21/21069	0.000506677	0.00830044	0.00725435	WRAP53/TCP1/NHP2/CCT6A/CCT7/PARN	6
low	GO:0061136	regulation of proteasomal protein catabolic process	24/1083	225/21069	0.000590196	0.00951396	0.00831493	UBQLN4/FBXO22/RNF40/HSPBP1/CCAR2/RCHY1/PSMC4/TMEM259/UCHL5/UBQLN1/GABARAP/VCP/SGTA/AXIN1/HERPUD1/WAC/STUB1/NUDT15/COMMD1/PSME3/CSNK1D/UBE2K/CAMLG/PSMC2	24
low	GO:0030968	endoplasmic reticulum unfolded protein response	12/1083	82/21069	0.000951336	0.0137908	0.0120528	TBL2/CREBZF/COPS5/AMFR/OS9/VCP/NCK2/HERPUD1/VAPB/QRICH1/STUB1/DERL1	12
low	GO:0006275	regulation of DNA replication	18/1083	156/21069	0.00112219	0.0157028	0.0137238	POLE3/PPP2CA/SMARCAL1/INO80E/WRNIP1/TFPT/NUCKS1/ING5/ACTR8/STOML2/MAP2K4/CIZ1/INO80C/NBN/UCHL5/ATF1/ZNF830/YY1	18
low	GO:0051225	spindle assembly	18/1083	156/21069	0.00112219	0.0157028	0.0137238	LSM14A/TUBGCP6/BCCIP/TUBGCP2/HNRNPU/CHMP5/NCOR1/CHMP3/CHMP2A/DYNC1H1/NEK7/HDAC3/CSNK1D/ABRAXAS2/RNF4/CHMP1A/CHMP6/TUBGCP3	18
low	GO:1904851	positive regulation of establishment of protein localization to telomere	4/1083	10/21069	0.00113589	0.0157307	0.0137481	WRAP53/TCP1/CCT6A/CCT7	4
low	GO:0098732	macromolecule deacylation	18/1083	157/21069	0.00120807	0.0165035	0.0144236	RBM14/DYRK1A/C6orf89/PPT2/ABHD10/CCAR2/CTBP1/SPHK2/SAP30BP/HDAC5/HDAC3/KAT14/SPRED2/SIRT4/MBD3/SKI/WDR5/MTA1	18
low	GO:0043486	histone exchange	5/1083	17/21069	0.00130963	0.0177107	0.0154787	ZNHIT1/KAT5/DMAP1/RNF8/VPS72	5
low	GO:0000422	autophagy of mitochondrion	13/1083	97/21069	0.00137234	0.0181395	0.0158534	HTT/ATG5/MARK2/SLC25A46/CDC37/ULK1/GABARAP/ATG4B/USP30/BECN1/HTRA2/TSC2/MUL1	13
low	GO:0050000	chromosome localization	13/1083	97/21069	0.00137234	0.0181395	0.0158534	VPS4A/KAT5/HNRNPU/TRAPPC12/CHMP5/CHMP3/CHMP2A/DYNC1H1/BECN1/MIS12/CHMP1A/CHMP6/NUP62	13
low	GO:0090169	regulation of spindle assembly	8/1083	43/21069	0.00138116	0.0181395	0.0158534	HNRNPU/CHMP5/CHMP3/CHMP2A/DYNC1H1/RNF4/CHMP1A/CHMP6	8
low	GO:0060338	regulation of type I interferon-mediated signaling pathway	8/1083	44/21069	0.0016132	0.0209716	0.0183286	LSM14A/CDC37/METTL3/YTHDF2/CNOT7/YTHDF3/UBE2K/MUL1	8
low	GO:0097502	mannosylation	7/1083	35/21069	0.001763	0.0225552	0.0197126	PIGM/ALG2/DPM2/ALG11/PIGB/FKRP/NUS1	7
low	GO:1902115	regulation of organelle assembly	24/1083	246/21069	0.00202567	0.0254313	0.0222262	RBM14/ENTR1/HTT/VPS11/ATG5/HNRNPU/IFT20/TRAPPC12/CHMP5/ULK1/CHMP3/CHMP2A/G3BP2/PHF23/DYNC1H1/TBC1D7/BECN1/G3BP1/RNF5/PPP1R35/RNF4/CHMP1A/CHMP6/NUP62	24
low	GO:0007031	peroxisome organization	7/1083	36/21069	0.00209288	0.0260318	0.0227511	PEX6/PEX11B/PEX10/PEX26/PEX14/PEX12/ACOT8	7
low	GO:0061025	membrane fusion	20/1083	192/21069	0.00215938	0.0266941	0.0233299	VPS4A/BET1L/VPS11/NSFL1C/STX5/VPS18/BLOC1S6/CHMP5/SNAPIN/RABIF/CHMP3/CHMP2A/STX10/USO1/TGFBRAP1/VPS39/YIPF4/CHMP1A/CHMP6/TOM1	20
low	GO:0019081	viral translation	5/1083	19/21069	0.00225878	0.0271728	0.0237483	EIF3D/EIF3A/ATG5/EIF3B/PCBP2	5
low	GO:0071166	ribonucleoprotein complex localization	5/1083	19/21069	0.00225878	0.0271728	0.0237483	PRPF31/SUPT6H/RIOK2/NSUN2/IWS1	5
low	GO:1901096	regulation of autophagosome maturation	5/1083	19/21069	0.00225878	0.0271728	0.0237483	UBQLN4/ATG5/TBC1D25/PHF23/TOM1	5
low	GO:0048278	vesicle docking	10/1083	69/21069	0.00265552	0.0303165	0.0264958	RAB10/VPS11/EXOC8/EXOC7/EXOC3/STX5/VPS18/BLOC1S6/STX10/USO1	10
low	GO:0016241	regulation of macroautophagy	19/1083	182/21069	0.00268236	0.0305364	0.026688	ATP6V1G1/HTT/UBQLN4/VPS35/ATG5/RNF31/EXOC8/EXOC7/TBC1D25/ULK1/UBQLN1/VPS26B/PHF23/WAC/WDR24/USP30/BECN1/TSC2/TOM1	19
low	GO:1990182	exosomal secretion	5/1083	20/21069	0.00288562	0.0325744	0.0284691	HGS/VPS4A/COPS5/CHMP2A/SNF8	5
low	GO:0030520	intracellular estrogen receptor signaling pathway	9/1083	59/21069	0.00299921	0.0337621	0.0295071	UBA5/VPS11/PAGR1/VPS18/DDX54/KMT2D/TRIP4/EGLN2/NCOA4	9
low	GO:0042770	signal transduction in response to DNA damage	21/1083	212/21069	0.00312169	0.0348488	0.0304569	KMT5A/ZNHIT1/DYRK1A/TTI1/TIPRL/CCAR2/KAT5/PPP1R10/FEM1B/USP10/BABAM1/NBN/HUS1/FBXO6/ING4/TAOK2/WAC/SPRED2/ZNF830/MAPK14/MUS81	21
low	GO:0035437	maintenance of protein localization in endoplasmic reticulum	4/1083	13/21069	0.00341669	0.0374165	0.0327009	OS9/RER1/GPAA1/ANKRD13C	4
low	GO:0015919	peroxisomal membrane transport	5/1083	21/21069	0.00362904	0.0395271	0.0345456	PEX6/PEX10/PEX26/PEX14/PEX12	5
low	GO:0097734	extracellular exosome biogenesis	5/1083	21/21069	0.00362904	0.0395271	0.0345456	HGS/VPS4A/COPS5/CHMP2A/SNF8	5
low	GO:0022406	membrane docking	12/1083	96/21069	0.00372362	0.0398518	0.0348294	RAB10/VPS11/EXOC8/EXOC7/EXOC3/STX5/VPS18/BLOC1S6/STX10/USO1/VAPB/SNX3	12
low	GO:0010824	regulation of centrosome duplication	8/1083	50/21069	0.0037249	0.0398518	0.0348294	RBM14/FBXW5/CHMP5/CHMP3/CHMP2A/PPP1R35/CHMP1A/NUP62	8
low	GO:0001778	plasma membrane repair	6/1083	30/21069	0.00373289	0.0398518	0.0348294	VPS4A/CHMP5/CHMP3/CHMP2A/CHMP1A/CHMP6	6
low	GO:0060966	regulation of gene silencing by RNA	9/1083	62/21069	0.00422238	0.0437498	0.0382361	TARBP2/ELAVL1/PUM2/EIF4G1/NCOR1/BCDIN3D/PUM1/MAP2K2/NCOR2	9
low	GO:0009895	negative regulation of catabolic process	32/1083	381/21069	0.0045388	0.0464248	0.0405739	ELAVL1/UBQLN4/VPS35/ZDHHC7/RPTOR/CCAR2/HNRNPU/SNX12/AZIN1/EIF4ENIF1/MLST8/RGP1/EIF4G1/NCOR1/UCHL5/LARP4B/PHF23/SGTA/NSUN2/METTL16/PARN/WAC/SNX3/USP30/BECN1/DEDD/TSC2/MAPK14/CAMLG/BANP/THRAP3/RNF5	32
low	GO:0051645	Golgi localization	4/1083	14/21069	0.00459054	0.0465992	0.0407264	ARCN1/STK25/STK11/COPG1	4
a. Gene expression variation across tissues based on the quartile of the total distribution of CV values: low variable expression (CV <= first quartile), medium variable expression (first quartile < CV < third quartile) and high variable expression (CV >= third quartile).

## Sheet: Table S4
Table S4. Significantly enriched Gene Ontology terms of overlapped house-keeping genes.
Expression Levela	ID	Description	GeneRatio	BgRatio	pvalue	p.adjust	qvalue	geneID	Count
high	GO:0048193	Golgi vesicle transport	20/187	328/21069	1.46663e-11	2.89072e-08	2.43769e-08	RAB10/TEX261/TRAPPC5/COPZ1/TMED10/SCAMP2/ARCN1/RER1/TMED4/ARL1/COPG1/VCP/VAPB/RAB14/SNX3/CSNK1D/GOLPH3/TMED7/PDCD6/TRAPPC1	20
high	GO:0036503	ERAD pathway	12/187	127/21069	1.48303e-09	1.00333e-06	8.4609e-07	AMFR/OS9/SEL1L/TMEM259/UBQLN1/VCP/SGTA/CALR/HERPUD1/STUB1/DERL1/CANX	12
high	GO:0030433	ubiquitin-dependent ERAD pathway	11/187	102/21069	1.77061e-09	1.00333e-06	8.4609e-07	AMFR/OS9/SEL1L/UBQLN1/VCP/SGTA/CALR/HERPUD1/STUB1/DERL1/CANX	11
high	GO:0043484	regulation of RNA splicing	14/187	193/21069	2.03619e-09	1.00333e-06	8.4609e-07	SF1/HNRNPL/TRA2B/U2AF2/HNRNPH2/HNRNPU/USP22/SF3B5/KHDRBS1/SRRM1/SRSF1/SRSF2/THRAP3/RBM4	14
high	GO:0002183	cytoplasmic translational initiation	8/187	42/21069	3.02245e-09	1.19145e-06	1.00473e-06	EIF3D/EIF3A/EIF4B/NCBP2/EIF4G1/EIF3I/RBM4/EIF4H	8
high	GO:0006900	vesicle budding from membrane	10/187	88/21069	5.90893e-09	1.66379e-06	1.40304e-06	VPS4A/TRAPPC5/TMED10/CHMP5/VAPB/SNX3/CSNK1D/GOLPH3/PDCD6/TRAPPC1	10
high	GO:0034976	response to endoplasmic reticulum stress	16/187	295/21069	9.36964e-09	1.84676e-06	1.55733e-06	AMFR/OS9/SEL1L/FLOT1/TMEM259/EIF4G1/GORASP2/UBQLN1/VCP/SGTA/CALR/HERPUD1/VAPB/STUB1/DERL1/CANX	16
high	GO:0090150	establishment of protein localization to membrane	15/187	292/21069	5.67216e-08	1.01635e-05	8.57067e-06	ATAD1/RAB10/VPS35/EMC3/WDR83OS/EMC4/ZDHHC4/TOMM22/GET3/SRP19/GORASP2/TIMM13/OXA1L/SGTA/GOLPH3	15
high	GO:0000380	alternative mRNA splicing, via spliceosome	9/187	86/21069	7.19862e-08	1.10711e-05	9.336e-06	HNRNPL/TRA2B/HNRNPU/NCBP2/KHDRBS1/SRSF1/SRSF2/THRAP3/RBM4	9
high	GO:0006605	protein targeting	16/187	349/21069	9.71151e-08	1.28711e-05	1.08539e-05	PMPCA/VPS4A/SPCS2/OS9/LAMP2/ZDHHC4/TOMM22/CDC37/GET3/SRP19/UBE2L3/TIMM13/GABARAP/SGTA/HERPUD1/NCOA4	16
high	GO:1905214	regulation of RNA binding	5/187	14/21069	9.79534e-08	1.28711e-05	1.08539e-05	HNRNPL/EIF3D/CDK9/NUCKS1/EIF4G1	5
high	GO:0042176	regulation of protein catabolic process	17/187	415/21069	1.90533e-07	2.31317e-05	1.95065e-05	VPS35/CCAR2/PSMD2/AZIN1/TMEM259/UBQLN1/GABARAP/VCP/SGTA/OAZ2/HERPUD1/WAC/OAZ1/SNX3/STUB1/CSNK1D/PSMC2	17
high	GO:0016050	vesicle organization	16/187	368/21069	1.99512e-07	2.31317e-05	1.95065e-05	VPS4A/TRAPPC5/TMED10/CHMP5/SNAPIN/CHMP2A/RAB5B/VAPB/RAB14/SNX3/IST1/VPS25/CSNK1D/GOLPH3/PDCD6/TRAPPC1	16
high	GO:0072594	establishment of protein localization to organelle	18/187	482/21069	3.21175e-07	3.51687e-05	2.9657e-05	RAB10/PMPCA/VPS4A/TCP1/SPCS2/LAMP2/CCT6A/TOMM22/GET3/CCT7/SRP19/UBE2L3/TIMM13/OXA1L/SGTA/HERPUD1/NCOA4/VPS25	18
high	GO:0097352	autophagosome maturation	7/187	61/21069	1.12869e-06	9.42512e-05	7.94802e-05	VPS4A/LAMP2/CHMP5/SNAPIN/CHMP2A/UBQLN1/VCP	7
high	GO:1904896	ESCRT complex disassembly	4/187	10/21069	1.21046e-06	9.42512e-05	7.94802e-05	VPS4A/CHMP5/CHMP2A/IST1	4
high	GO:1904903	ESCRT III complex disassembly	4/187	10/21069	1.21046e-06	9.42512e-05	7.94802e-05	VPS4A/CHMP5/CHMP2A/IST1	4
high	GO:1905216	positive regulation of RNA binding	4/187	10/21069	1.21046e-06	9.42512e-05	7.94802e-05	HNRNPL/EIF3D/CDK9/EIF4G1	4
high	GO:0031647	regulation of protein stability	15/187	373/21069	1.29518e-06	9.42512e-05	7.94802e-05	VPS35/TCP1/CCAR2/LAMP2/SEL1L/CCT6A/FLOT1/CDC37/CCT7/CALR/BAG1/DAD1/STUB1/PFDN2/DERL1	15
high	GO:1902774	late endosome to lysosome transport	5/187	24/21069	1.93497e-06	0.000114821	9.68266e-05	VPS4A/VPS35/CHMP5/SNAPIN/CHMP2A	5
high	GO:0006457	protein folding	12/187	247/21069	2.24885e-06	0.000126642	0.000106795	MPDU1/TCP1/WDR83OS/CCT6A/CDC37/CCT7/CALR/BAG1/PFDN2/AHSA1/CANX/SELENOF	12
high	GO:0016236	macroautophagy	14/187	350/21069	3.14571e-06	0.000163182	0.000137608	ATP6V1G1/VPS4A/VPS35/LAMP2/CDC37/CHMP5/SNAPIN/RETREG2/CHMP2A/UBQLN1/GABARAP/VCP/WAC/VPS25	14
high	GO:0007029	endoplasmic reticulum organization	8/187	102/21069	3.56868e-06	0.000180355	0.00015209	RAB10/EMC3/WDR83OS/EMC4/GET3/RETREG2/SGTA/VAPB	8
high	GO:1901800	positive regulation of proteasomal protein catabolic process	9/187	138/21069	4.03966e-06	0.000198495	0.000167387	TMEM259/UBQLN1/GABARAP/VCP/SGTA/HERPUD1/STUB1/CSNK1D/PSMC2	9
high	GO:0006403	RNA localization	11/187	227/21069	6.15275e-06	0.000240122	0.00020249	MRPL18/TCP1/HNRNPU/CCT6A/NCBP2/FLOT1/KHDRBS1/CCT7/G3BP2/SRSF1/ALKBH5	11
high	GO:0048208	COPII vesicle coating	5/187	30/21069	6.21321e-06	0.000240122	0.00020249	TRAPPC5/TMED10/CSNK1D/PDCD6/TRAPPC1	5
high	GO:0030968	endoplasmic reticulum unfolded protein response	7/187	82/21069	8.40837e-06	0.000318709	0.000268761	AMFR/OS9/VCP/HERPUD1/VAPB/STUB1/DERL1	7
high	GO:0036258	multivesicular body assembly	5/187	33/21069	1.01268e-05	0.000369629	0.000311701	VPS4A/CHMP5/CHMP2A/IST1/VPS25	5
high	GO:0019058	viral life cycle	13/187	392/21069	5.08585e-05	0.00145278	0.0012251	VPS4A/NUCKS1/CTBP1/PCBP1/DDX6/CHMP5/CHMP2A/VCP/VAPB/CNOT7/SNX3/IST1/PCBP2	13
high	GO:1904851	positive regulation of establishment of protein localization to telomere	3/187	10/21069	7.88645e-05	0.00207256	0.00174775	TCP1/CCT6A/CCT7	3
high	GO:1904869	regulation of protein localization to Cajal body	3/187	11/21069	0.00010773	0.0026878	0.00226657	TCP1/CCT6A/CCT7	3
high	GO:1904871	positive regulation of protein localization to Cajal body	3/187	11/21069	0.00010773	0.0026878	0.00226657	TCP1/CCT6A/CCT7	3
high	GO:0075522	IRES-dependent viral translational initiation	3/187	12/21069	0.000142702	0.00319621	0.0026953	EIF3D/EIF3A/PCBP2	3
high	GO:1903405	protein localization to nuclear body	3/187	12/21069	0.000142702	0.00319621	0.0026953	TCP1/CCT6A/CCT7	3
high	GO:1904867	protein localization to Cajal body	3/187	12/21069	0.000142702	0.00319621	0.0026953	TCP1/CCT6A/CCT7	3
high	GO:1903320	regulation of protein modification by small protein conjugation or removal	10/187	275/21069	0.000181477	0.004019	0.00338914	U2AF2/OTUB1/UBE2L3/UBQLN1/GABARAP/VCP/HERPUD1/STUB1/DERL1/PDCD6	10
high	GO:0071826	ribonucleoprotein complex subunit organization	10/187	276/21069	0.000186873	0.00409252	0.00345114	SF1/EIF3D/EIF3A/MRPL20/EIF4B/SF3B5/EIF3I/SRSF1/VCP/EIF4H	10
high	GO:0006596	polyamine biosynthetic process	3/187	14/21069	0.000233036	0.00481855	0.00406339	AZIN1/OAZ2/OAZ1	3
high	GO:0046761	viral budding from plasma membrane	3/187	14/21069	0.000233036	0.00481855	0.00406339	VPS4A/CHMP5/CHMP2A	3
high	GO:0043162	ubiquitin-dependent protein catabolic process via the multivesicular body sorting pathway	4/187	38/21069	0.000350344	0.00663969	0.00559912	VPS4A/CHMP5/CHMP2A/VPS25	4
high	GO:1904874	positive regulation of telomerase RNA localization to Cajal body	3/187	16/21069	0.000353857	0.00664241	0.00560141	TCP1/CCT6A/CCT7	3
high	GO:1905898	positive regulation of response to endoplasmic reticulum stress	4/187	41/21069	0.00047079	0.00828507	0.00698664	TMEM259/UBQLN1/SGTA/HERPUD1	4
high	GO:0006595	polyamine metabolic process	3/187	18/21069	0.000508924	0.00872252	0.00735552	AZIN1/OAZ2/OAZ1	3
high	GO:0061952	midbody abscission	3/187	18/21069	0.000508924	0.00872252	0.00735552	VPS4A/CHMP5/CHMP2A	3
high	GO:0090169	regulation of spindle assembly	4/187	43/21069	0.000565847	0.00961452	0.00810773	HNRNPU/CHMP5/CHMP2A/RNF4	4
high	GO:0006986	response to unfolded protein	7/187	163/21069	0.000644996	0.0105941	0.00893376	AMFR/OS9/VCP/HERPUD1/VAPB/STUB1/DERL1	7
high	GO:0070936	protein K48-linked ubiquitination	5/187	78/21069	0.000652589	0.0106302	0.00896423	AMFR/UBE2D2/GABARAP/RNF4/UBE2R2	5
high	GO:0022618	ribonucleoprotein complex assembly	9/187	268/21069	0.000676227	0.010925	0.0092128	SF1/EIF3D/EIF3A/MRPL20/EIF4B/SF3B5/EIF3I/SRSF1/EIF4H	9
high	GO:0090148	membrane fission	4/187	46/21069	0.000732888	0.0115562	0.0097451	VPS4A/CHMP5/CHMP2A/VPS25	4
high	GO:0007051	spindle organization	8/187	227/21069	0.000982801	0.014675	0.0123751	LSM14A/PTPA/HNRNPU/CHMP5/CHMP2A/VCP/CSNK1D/RNF4	8
high	GO:0032008	positive regulation of TOR signaling	4/187	50/21069	0.00100618	0.0148702	0.0125397	OTUD5/LAMTOR3/WAC/GOLPH3	4
high	GO:0051648	vesicle localization	8/187	228/21069	0.00101096	0.0148702	0.0125397	VPS4A/TRAPPC5/TMED10/SNAPIN/CHMP2A/CSNK1D/PDCD6/TRAPPC1	8
high	GO:0033962	P-body assembly	3/187	23/21069	0.00106908	0.0154937	0.0130656	LSM14A/DDX6/CNOT7	3
high	GO:0030111	regulation of Wnt signaling pathway	10/187	349/21069	0.00116206	0.0167184	0.0140983	PPP2CA/VPS35/AMFR/OTUD5/CCAR2/PPP1CA/RNF220/VCP/SNX3/CSNK1D	10
high	GO:0007033	vacuole organization	8/187	235/21069	0.00122666	0.0172508	0.0145472	VPS4A/VPS35/CHMP5/SNAPIN/CHMP2A/UBQLN1/GABARAP/RAB14	8
high	GO:0050657	nucleic acid transport	7/187	183/21069	0.00126908	0.0172508	0.0145472	MRPL18/NCBP2/FLOT1/KHDRBS1/G3BP2/SRSF1/ALKBH5	7
high	GO:0050658	RNA transport	7/187	183/21069	0.00126908	0.0172508	0.0145472	MRPL18/NCBP2/FLOT1/KHDRBS1/G3BP2/SRSF1/ALKBH5	7
high	GO:0032386	regulation of intracellular transport	10/187	354/21069	0.00129231	0.0173447	0.0146265	VPS35/OS9/NCBP2/SNAPIN/KHDRBS1/UBE2L3/OAZ2/OAZ1/SNX3/RBM4	10
high	GO:0198738	cell-cell signaling by wnt	12/187	482/21069	0.00129359	0.0173447	0.0146265	PPP2CA/VPS35/AMFR/OTUD5/CCAR2/HBP1/CSNK2B/PPP1CA/RNF220/VCP/SNX3/CSNK1D	12
high	GO:0045185	maintenance of protein location	5/187	94/21069	0.00151408	0.0200286	0.0168897	OS9/HNRNPU/RER1/G3BP2/GOLPH3	5
high	GO:0016573	histone acetylation	7/187	189/21069	0.00152742	0.0200703	0.0169249	POLE3/GLYR1/CTBP1/USP22/SF3B5/CTCF/MBD3	7
high	GO:0031468	nuclear membrane reassembly	3/187	26/21069	0.00153913	0.0200902	0.0169417	VPS4A/CHMP5/CHMP2A	3
high	GO:0032210	regulation of telomere maintenance via telomerase	4/187	59/21069	0.00186902	0.0239211	0.0201722	TCP1/HNRNPU/CCT6A/CCT7	4
high	GO:0006622	protein targeting to lysosome	3/187	28/21069	0.00191422	0.0241854	0.0203951	VPS4A/LAMP2/NCOA4	3
high	GO:0007080	mitotic metaphase plate congression	4/187	62/21069	0.00224412	0.0273035	0.0230245	VPS4A/HNRNPU/CHMP5/CHMP2A	4
high	GO:0001778	plasma membrane repair	3/187	30/21069	0.00234166	0.0283155	0.0238779	VPS4A/CHMP5/CHMP2A	3
high	GO:0006354	DNA-templated transcription elongation	8/187	265/21069	0.00260027	0.0306894	0.0258797	ZMYND11/CDK9/CCAR2/HNRNPU/NCBP2/RALY/THRAP3/ELOF1	8
high	GO:0032507	maintenance of protein location in cell	4/187	66/21069	0.00282083	0.0325482	0.0274472	OS9/HNRNPU/RER1/GOLPH3	4
high	GO:0043653	mitochondrial fragmentation involved in apoptotic process	2/187	10/21069	0.00336473	0.0362459	0.0305654	VPS35/CCAR2	2
high	GO:0061640	cytoskeleton-dependent cytokinesis	5/187	114/21069	0.00351365	0.0372334	0.0313982	VPS4A/CHMP5/CHMP2A/JTB/IST1	5
high	GO:0071709	membrane assembly	4/187	71/21069	0.00367477	0.0387324	0.0326623	VPS4A/FLOT1/CHMP5/CHMP2A	4
high	GO:1904951	positive regulation of establishment of protein localization	9/187	344/21069	0.00372321	0.0390343	0.0329169	VPS35/TCP1/TMED10/CCT6A/CCT7/UBE2L3/OAZ2/OAZ1/GOLPH3	9
high	GO:0007623	circadian rhythm	7/187	225/21069	0.00404407	0.0415384	0.0350285	HNRNPL/CCAR2/HNRNPU/PPP1CA/CSNK1D/THRAP3/RBM4	7
high	GO:0032922	circadian regulation of gene expression	4/187	73/21069	0.0040605	0.0415384	0.0350285	HNRNPU/PPP1CA/CSNK1D/RBM4	4
high	GO:0071340	skeletal muscle acetylcholine-gated channel clustering	2/187	11/21069	0.00408851	0.0415384	0.0350285	RER1/CRKL	2
high	GO:0044091	membrane biogenesis	4/187	75/21069	0.00447273	0.04475	0.0377368	VPS4A/FLOT1/CHMP5/CHMP2A	4
high	GO:0051469	vesicle fusion with vacuole	2/187	12/21069	0.00487767	0.046897	0.0395473	CHMP5/CHMP2A	2
high	GO:0042752	regulation of circadian rhythm	5/187	124/21069	0.00502088	0.0478075	0.0403151	CCAR2/PPP1CA/CSNK1D/THRAP3/RBM4	5
high	GO:0046685	response to arsenic-containing substance	3/187	40/21069	0.00534053	0.0496518	0.0418704	VCP/RNF4/RBM4	3
medium	GO:0034470	ncRNA processing	74/609	489/21069	3.08496e-32	1.00909e-28	9.05355e-29	TARBP2/MTERF4/DDX49/METTL25B/UTP11/WDR18/MRM2/NOL10/DPH3/RRP1/GTPBP3/ELAC1/TSN/ZCCHC8/NHP2/INTS11/RPF1/NCBP1/INTS5/DDX56/PUM2/MRPL44/KRR1/RIOK2/TUT1/DDX54/MRTO4/AGO1/C2orf49/EXOSC1/PUS1/NCOR1/TRIT1/TSR3/PUS3/METTL3/NSUN2/YTHDF2/TRMT13/NOL11/RPP25L/RRP7A/SNIP1/PARN/NOL8/TRMT10B/EXOSC3/PUM1/BRIX1/TRNT1/DDX47/REXO4/MRPS11/DGCR8/TRMT2A/RPP14/TRMT12/PTCD1/NOB1/UTP25/FTSJ3/TRMT10C/MAP2K2/NCOR2/METTL5/T…	74
medium	GO:0016072	rRNA metabolic process	41/609	292/21069	4.68715e-17	6.44698e-14	5.78422e-14	DIS3L/MTERF4/DDX49/METTL25B/UTP11/WDR18/MRM2/NOL10/PELO/RRP1/NHP2/RPF1/DDX56/MRPL44/KRR1/RIOK2/DDX54/MRTO4/EXOSC1/TSR3/POLR1B/YTHDF2/NOL11/RRP7A/GTF3C2/NOL8/EXOSC3/BRIX1/DDX47/REXO4/MRPS11/DEDD/NOB1/UTP25/FTSJ3/GTF3C5/METTL5/TFB1M/MAK16/RBFA/EXOSC2	41
medium	GO:0042254	ribosome biogenesis	44/609	338/21069	5.91286e-17	6.44698e-14	5.78422e-14	GRWD1/MTERF4/DDX49/RSL24D1/METTL25B/UTP11/WDR18/MRM2/NOL10/RRP1/NHP2/RPF1/DDX56/MRPL44/KRR1/RIOK2/DDX54/MRTO4/EXOSC1/TSR3/ERAL1/YTHDF2/NOL11/MRPS7/NOM1/ZNF622/RRP7A/HEATR3/NOL8/PAK1IP1/EXOSC3/BRIX1/MRPL22/DDX47/REXO4/MRPS11/NOB1/UTP25/FTSJ3/METTL5/TFB1M/MAK16/RBFA/EXOSC2	44
medium	GO:0140053	mitochondrial gene expression	31/609	176/21069	5.46213e-16	4.46666e-13	4.00748e-13	MRPS30/MTERF4/SARS2/MRPS27/MRPS9/THAP11/PTCD3/MRPL54/MRPL50/MTRF1L/MRPL44/RCC1L/PUS1/TRIT1/GADD45GIP1/MRPS7/QRSL1/HARS1/MRPL22/TRNT1/MRPL46/MRPS11/PTCD1/MTIF3/MTRES1/TRMT10C/MRPS21/MRPL45/TFB1M/MTERF1/FASTKD5	31
medium	GO:0032543	mitochondrial translation	22/609	142/21069	1.33576e-10	5.4616e-08	4.90014e-08	MRPS30/SARS2/MRPS27/MRPS9/PTCD3/MRPL54/MRPL50/MTRF1L/MRPL44/RCC1L/GADD45GIP1/MRPS7/QRSL1/HARS1/MRPL22/MRPL46/MRPS11/PTCD1/MTIF3/TRMT10C/MRPS21/MRPL45	22
medium	GO:0000209	protein polyubiquitination	29/609	271/21069	1.49643e-09	3.76526e-07	3.37818e-07	TRIM27/UBE2H/UBE3B/FBXO22/RNF40/RNF31/SPOP/UBE3C/RNF115/RNF8/RNF20/UBE4B/TMEM129/NPEPPS/SHARPIN/RNF26/PLAA/RNF126/FBXW11/AXIN1/ANAPC7/UBE4A/CDC16/UBE2K/MUL1/RNF166/PPIL2/ANKRD39/TRAF6	29
medium	GO:0006368	transcription elongation by RNA polymerase II promoter	19/609	121/21069	1.92879e-09	4.48629e-07	4.02509e-07	MED19/MED18/EAPP/INTS11/RNF8/SUPT6H/NCBP1/PWWP2A/INTS5/AXIN1/CDC73/NELFA/CCNK/PAF1/ERCC3/MED24/NELFB/MED16/MED7	19
medium	GO:0034243	regulation of transcription elongation by RNA polymerase II	17/609	96/21069	2.0573e-09	4.48629e-07	4.02509e-07	MED19/MED18/EAPP/INTS11/RNF8/SUPT6H/NCBP1/PWWP2A/INTS5/AXIN1/CDC73/NELFA/CCNK/MED24/NELFB/MED16/MED7	17
medium	GO:0006401	RNA catabolic process	31/609	339/21069	1.79115e-08	3.44638e-06	3.09209e-06	DIS3L/DDX49/CELF1/PELO/PPP1R8/MTPAP/RNASEH2C/SKIC2/DXO/ZCCHC8/CASC3/SMG7/EIF4ENIF1/NCBP1/GTPBP1/YTHDF1/PUM2/MRTO4/AGO1/EXOSC1/LARP4B/METTL14/METTL3/NSUN2/YTHDF2/PARN/EXOSC3/PUM1/KHSRP/EXOSC2/FASTKD5	31
medium	GO:1903311	regulation of mRNA metabolic process	30/609	332/21069	3.98164e-08	6.66875e-06	5.9832e-06	SFSWAP/DYRK1A/SAFB2/CELF1/CASC3/EIF4ENIF1/SUPT6H/NCBP1/GTPBP1/YTHDF1/PUM2/LARP4B/METTL14/METTL3/YTHDF2/CDC73/PARN/EXOSC3/PUM1/JMJD6/NSRP1/SMU1/DAZAP1/ZBTB7A/PAF1/KHSRP/IWS1/RBM23/EXOSC2/FASTKD5	30
medium	GO:1903008	organelle disassembly	19/609	145/21069	4.0775e-08	6.66875e-06	5.9832e-06	HTT/ASCC2/PELO/UBA5/ATG5/KAT5/GBF1/MARK2/STX5/SLC25A46/ULK1/TRIP4/ATG4B/RRP7A/USP30/HTRA2/MTIF3/TSC2/MUL1	19
medium	GO:0032259	methylation	33/609	422/21069	2.5894e-07	3.52914e-05	3.16634e-05	KMT5A/ASH2L/METTL25B/MRM2/GTPBP3/DMAP1/NCOA6/SUPT6H/RNF20/PCIF1/PAGR1/EHMT1/METTL14/KMT2D/METTL3/NSUN2/TRMT13/RBBP5/ATPSCKMT/NELFA/TRMT10B/TRMT2A/TRMT12/PAF1/FTSJ3/IWS1/TRMT10C/METTL5/TRMT61A/TFB1M/METTL23/ASMTL/WDR5	33
medium	GO:0070918	small regulatory ncRNA processing	12/609	69/21069	5.98117e-07	6.98729e-05	6.26899e-05	TARBP2/TSN/NCBP1/PUM2/AGO1/NCOR1/METTL3/SNIP1/PUM1/DGCR8/MAP2K2/NCOR2	12
medium	GO:0016050	vesicle organization	29/609	368/21069	1.17977e-06	0.000128634	0.00011541	HGS/AP3S2/SEC24C/VPS11/TRAPPC3/VTA1/GBF1/EXOC8/TRAPPC10/PPP6C/TRAPPC12/STX5/VPS18/BLOC1S6/RNF26/SNX19/CHMP3/MFSD14A/STX10/USO1/RAB22A/SNX11/OSBP/TGFBRAP1/VPS39/YIPF4/CHMP6/BLOC1S5/TOM1	29
medium	GO:0018205	peptidyl-lysine modification	32/609	457/21069	4.2289e-06	0.000371957	0.000333719	KMT5A/PIAS4/TRIM27/ASH2L/MLLT1/SUPT7L/BAZ1B/DOHH/ATG5/KAT5/DMAP1/DHPS/NCOA6/SUPT6H/ING5/SPHK2/PWWP2A/MSL1/PAGR1/EHMT1/KMT2D/RBBP5/ING4/ATPSCKMT/NELFA/VPS72/KAT14/JMJD6/MUL1/IWS1/MED24/WDR5	32
medium	GO:0099022	vesicle tethering	8/609	34/21069	4.34818e-06	0.000371957	0.000333719	TRAPPC3/EXOC8/TRAPPC10/EXOC7/EXOC3/TRAPPC12/TBC1D23/C17orf75	8
medium	GO:0000301	retrograde transport, vesicle recycling within Golgi	5/609	10/21069	4.43483e-06	0.000371957	0.000333719	COG8/COG1/COG4/COG3/COG2	5
medium	GO:0033523	histone H2B ubiquitination	5/609	10/21069	4.43483e-06	0.000371957	0.000333719	RNF40/RNF8/RNF20/CDC73/PAF1	5
medium	GO:0071826	ribonucleoprotein complex subunit organization	23/609	276/21069	5.98562e-06	0.000466165	0.000418243	TARBP2/SFSWAP/AAR2/MRM2/CELF1/PRPF31/DHX8/CRNKL1/NCBP1/GEMIN8/USP39/MRTO4/AGO1/TXNL4A/ERAL1/MRPS7/RRP7A/CDC73/SNIP1/BRIX1/MRPS11/DDX23/ISY1	23
medium	GO:0016197	endosomal transport	22/609	268/21069	1.204e-05	0.000895064	0.000803051	HGS/TRIM27/ENTR1/BET1L/VPS26C/VTA1/GBF1/TRAPPC10/AP5S1/STX5/RGP1/CHMP3/RNF126/VPS26B/TBC1D23/VPS51/GGA3/STX10/VPS39/CHMP6/TOM1/TBC1D17	22
medium	GO:0022618	ribonucleoprotein complex assembly	22/609	268/21069	1.204e-05	0.000895064	0.000803051	TARBP2/SFSWAP/AAR2/MRM2/CELF1/PRPF31/CRNKL1/NCBP1/GEMIN8/USP39/MRTO4/AGO1/TXNL4A/ERAL1/MRPS7/RRP7A/CDC73/SNIP1/BRIX1/MRPS11/DDX23/ISY1	22
medium	GO:0048284	organelle fusion	16/609	163/21069	2.13169e-05	0.00151582	0.00135999	VPS11/STX5/MFN1/MIGA2/VPS18/RCC1L/CHMP3/STX10/USO1/USP30/MUL1/TGFBRAP1/VPS39/YIPF4/CHMP6/TOM1	16
medium	GO:0007030	Golgi organization	17/609	183/21069	2.44028e-05	0.00166295	0.001492	HTT/COG8/GBF1/COG1/TRAPPC12/STX5/STK25/TJAP1/COG4/ARMH3/VPS51/ATL2/USO1/COG3/COG2/MAP2K2/YIPF4	17
medium	GO:0006338	chromatin remodeling	28/609	411/21069	2.74575e-05	0.00177129	0.0015892	GRWD1/ZNHIT1/MLLT1/ARID1B/SMARCAL1/BAHD1/INO80E/BAZ1B/KAT5/DMAP1/TFPT/RNF8/SUPT6H/SPHK2/BRD3/INO80C/PHF2/UCHL5/MYSM1/KMT2D/KDM5C/KDM4B/HDAC5/AXIN1/VPS72/ZBTB7A/BCL7B/MTA1	28
medium	GO:0072594	establishment of protein localization to organelle	31/609	482/21069	3.14737e-05	0.00197982	0.00177629	HGS/MTERF4/WRAP53/TOMM40/NABP2/VPS11/PEX6/RNF31/DMAP1/NMT1/RALA/MTX2/PPP1R10/EIF4ENIF1/PEX10/TIMM21/NPEPPS/PEX14/IPO8/TOMM70/CHCHD4/GGA3/SEC63/HEATR3/HDAC3/TRMT10B/HTRA2/TSC2/ING1/SRPRB/TIMM29	31
medium	GO:0033044	regulation of chromosome organization	22/609	287/21069	3.46429e-05	0.00208631	0.00187184	ARID1B/NABP2/INO80E/BAZ1B/KAT5/PPP1R10/TFPT/TRAPPC12/MAPKAPK5/RIOK2/INO80C/NBN/UCHL5/DYNC1LI1/ANAPC7/NEK7/ERCC1/PARN/CDC16/MAP3K4/BCL7B/MNAT1	22
medium	GO:2001020	regulation of response to DNA damage stimulus	25/609	351/21069	3.55154e-05	0.00208631	0.00187184	KMT5A/ZNHIT1/PIAS4/WRAP53/UBQLN4/DYRK1A/CYREN/TMEM161A/ARID1B/SUPT7L/INO80E/BAZ1B/KAT5/DMAP1/WRNIP1/PPP1R10/TFPT/RNF8/FEM1B/UCHL5/ING4/ERCC1/VPS72/SPRED2/BCL7B	25
medium	GO:0051648	vesicle localization	19/609	228/21069	3.79975e-05	0.00218052	0.00195636	HGS/AP3S2/HTT/TRAPPC3/GBF1/EXOC8/TRAPPC10/EXOC7/PPP6C/EXOC3/TRAPPC12/BLOC1S6/TBC1D23/FBXW11/USO1/TOR1A/C17orf75/MKKS/BLOC1S5	19
medium	GO:0140694	non-membrane-bounded organelle assembly	28/609	436/21069	7.7232e-05	0.00384891	0.00345323	TUBGCP6/MTERF4/OGFOD1/MRM2/TUBGCP2/TRAPPC12/EIF4ENIF1/YTHDF1/ZFYVE1/PUM2/MRTO4/NCOR1/CHMP3/ERAL1/YTHDF2/MRPS7/RRP7A/NEK7/HDAC3/BRIX1/MRPL22/MRPS11/G3BP1/MIS12/ABRAXAS2/PPP1R35/CHMP6/TUBGCP3	28
medium	GO:0042255	ribosome assembly	9/609	63/21069	7.81022e-05	0.00384891	0.00345323	MTERF4/MRM2/MRTO4/ERAL1/MRPS7/RRP7A/BRIX1/MRPL22/MRPS11	9
medium	GO:0043486	histone exchange	5/609	17/21069	9.2024e-05	0.00436247	0.003914	ZNHIT1/KAT5/DMAP1/RNF8/VPS72	5
medium	GO:0044743	protein transmembrane import into intracellular organelle	7/609	38/21069	9.42509e-05	0.00440421	0.00395145	TOMM40/PEX6/PEX10/TIMM21/PEX14/TOMM70/CHCHD4	7
medium	GO:0016573	histone acetylation	16/609	189/21069	0.000127131	0.00569653	0.00511092	MLLT1/SUPT7L/BAZ1B/ATG5/KAT5/DMAP1/ING5/SPHK2/PWWP2A/MSL1/ING4/VPS72/KAT14/IWS1/MED24/WDR5	16
medium	GO:0006626	protein targeting to mitochondrion	12/609	116/21069	0.000136124	0.00593682	0.00532651	MTERF4/TOMM40/VPS11/RNF31/MTX2/TIMM21/NPEPPS/TOMM70/CHCHD4/TRMT10B/HTRA2/TIMM29	12
medium	GO:0048278	vesicle docking	9/609	69/21069	0.000160392	0.00682469	0.0061231	VPS11/EXOC8/EXOC7/EXOC3/STX5/VPS18/BLOC1S6/STX10/USO1	9
medium	GO:0006490	oligosaccharide-lipid intermediate biosynthetic process	5/609	19/21069	0.000164827	0.00682469	0.0061231	ALG2/DHDDS/DPAGT1/ALG11/NUS1	5
medium	GO:0071166	ribonucleoprotein complex localization	5/609	19/21069	0.000164827	0.00682469	0.0061231	PRPF31/SUPT6H/RIOK2/NSUN2/IWS1	5
medium	GO:0006839	mitochondrial transport	17/609	214/21069	0.000171535	0.00692703	0.00621492	MTERF4/TOMM40/RHOT2/VPS11/RNF31/NMT1/MTX2/SLC25A46/TIMM21/NPEPPS/TOMM70/CHCHD4/TRMT10B/HTRA2/MUL1/SLC25A32/TIMM29	17
medium	GO:0008535	respiratory chain complex IV assembly	6/609	31/21069	0.000226133	0.00860093	0.00771674	SLC25A46/TIMM21/COA1/COA5/COX15/COA4	6
medium	GO:0016236	macroautophagy	23/609	350/21069	0.000237131	0.00891557	0.00799903	HGS/HTT/UBQLN4/ATG16L1/UBA5/ATG5/RNF31/VTA1/EXOC8/EXOC7/ZFYVE1/ULK1/PLAA/CHMP3/VPS26B/ATG4B/WDR24/USP30/HTRA2/TSC2/VPS39/CHMP6/TOM1	23
medium	GO:0033143	regulation of intracellular steroid hormone receptor signaling pathway	9/609	73/21069	0.000248059	0.00897149	0.00804921	SAFB2/UBA5/VPS11/PAGR1/VPS18/NCOR1/KMT2D/ZBTB7A/NCOR2	9
medium	GO:0045727	positive regulation of translation	14/609	163/21069	0.000284452	0.0096921	0.00869574	TARBP2/MRPS27/RPS6KB2/PCIF1/YTHDF1/RCC1L/LARP4B/METTL14/METTL3/NCK2/YTHDF2/RPS6KB1/TRMT10C/METTL5	14
medium	GO:0090148	membrane fission	7/609	46/21069	0.00032734	0.0107073	0.00960656	HGS/EXOC8/EXOC7/EXOC3/SLC25A46/CHMP3/CHMP6	7
medium	GO:0034058	endosomal vesicle fusion	4/609	13/21069	0.000401358	0.0126235	0.0113258	VPS11/VPS18/TGFBRAP1/VPS39	4
medium	GO:0045815	epigenetic maintenance of chromatin in transcription-competent conformation	4/609	13/21069	0.000401358	0.0126235	0.0113258	ARID1B/SPHK2/PHF2/VPS72	4
medium	GO:0034250	positive regulation of cellular amide metabolic process	15/609	192/21069	0.000484763	0.0142852	0.0128167	TARBP2/MRPS27/RPS6KB2/SPHK2/PCIF1/YTHDF1/RCC1L/LARP4B/METTL14/METTL3/NCK2/YTHDF2/RPS6KB1/TRMT10C/METTL5	15
medium	GO:0000422	autophagy of mitochondrion	10/609	97/21069	0.000497647	0.0144054	0.0129245	HTT/ATG5/MARK2/SLC25A46/ULK1/ATG4B/USP30/HTRA2/TSC2/MUL1	10
medium	GO:0031056	regulation of histone modification	15/609	197/21069	0.000634137	0.017003	0.0152551	C6orf89/BAZ1B/ATG5/SUPT6H/RNF20/SPHK2/PWWP2A/SAP30BP/EHMT1/NELFA/KAT14/PAF1/IWS1/SKI/WDR5	15
medium	GO:0098732	macromolecule deacylation	13/609	157/21069	0.000657132	0.0173345	0.0155525	DYRK1A/C6orf89/PPT2/ABHD10/SPHK2/SAP30BP/HDAC5/HDAC3/KAT14/SPRED2/SKI/WDR5/MTA1	13
medium	GO:0043162	ubiquitin-dependent protein catabolic process via the multivesicular body sorting pathway	6/609	38/21069	0.000714359	0.0185543	0.0166469	HGS/RNF115/PLAA/CHMP3/RNF126/CHMP6	6
medium	GO:0035542	regulation of SNARE complex assembly	4/609	15/21069	0.000731737	0.0185543	0.0166469	VPS11/VPS18/TGFBRAP1/VPS39	4
medium	GO:0048308	organelle inheritance	4/609	15/21069	0.000731737	0.0185543	0.0166469	GBF1/STX5/STK25/MAP2K2	4
medium	GO:0006302	double-strand break repair	20/609	315/21069	0.000906048	0.022117	0.0198434	PIAS4/WRAP53/UBQLN4/CYREN/ARID1B/NABP2/SMARCAL1/KAT5/DMAP1/RNF8/AP5S1/NBN/TOP3A/ERCC1/VPS72/ZBTB7A/MARF1/BCL7B/KDM2A/MTA1	20
medium	GO:0031331	positive regulation of cellular catabolic process	27/609	486/21069	0.0009956	0.0235986	0.0211726	TRIM27/HTT/CELF1/FBXO22/HSPBP1/ATG16L1/KAT5/DXO/RNF31/RCHY1/EIF4ENIF1/MLST8/GTPBP1/YTHDF1/ULK1/METTL14/METTL3/YTHDF2/AXIN1/PARN/EXOSC3/PUM1/WDR24/TSC2/KHSRP/TOM1/EXOSC2	27
medium	GO:0016571	histone methylation	14/609	187/21069	0.0011184	0.0255249	0.0229009	KMT5A/ASH2L/NCOA6/SUPT6H/RNF20/PAGR1/EHMT1/KMT2D/RBBP5/NELFA/PAF1/IWS1/METTL23/WDR5	14
medium	GO:0006901	vesicle coating	6/609	43/21069	0.00139639	0.0292094	0.0262066	AP3S2/TRAPPC3/GBF1/TRAPPC10/PPP6C/TRAPPC12	6
medium	GO:1901532	regulation of hematopoietic progenitor cell differentiation	6/609	43/21069	0.00139639	0.0292094	0.0262066	ZNHIT1/KAT5/SOS1/METTL14/METTL3/YTHDF2	6
medium	GO:0006406	mRNA export from nucleus	8/609	75/21069	0.00143136	0.0295992	0.0265563	DDX19A/CASC3/SMG7/SUPT6H/NCBP1/NSUN2/NCBP3/IWS1	8
medium	GO:0061025	membrane fusion	14/609	192/21069	0.00143879	0.0295992	0.0265563	BET1L/VPS11/STX5/VPS18/BLOC1S6/RABIF/CHMP3/STX10/USO1/TGFBRAP1/VPS39/YIPF4/CHMP6/TOM1	14
medium	GO:0006488	dolichol-linked oligosaccharide biosynthetic process	4/609	18/21069	0.00153114	0.0305571	0.0274158	ALG2/DHDDS/DPAGT1/NUS1	4
medium	GO:0016226	iron-sulfur cluster assembly	5/609	30/21069	0.00155366	0.0305571	0.0274158	CIAO3/BOLA1/CIAO1/NUBP2/ISCA2	5
medium	GO:0031163	metallo-sulfur cluster assembly	5/609	30/21069	0.00155366	0.0305571	0.0274158	CIAO3/BOLA1/CIAO1/NUBP2/ISCA2	5
medium	GO:0030330	DNA damage response, signal transduction by p53 class mediator	8/609	76/21069	0.00156008	0.0305571	0.0274158	KMT5A/ZNHIT1/DYRK1A/KAT5/USP10/NBN/ING4/SPRED2	8
medium	GO:0034063	stress granule assembly	5/609	31/21069	0.00180895	0.0348064	0.0312283	OGFOD1/YTHDF1/PUM2/YTHDF2/G3BP1	5
medium	GO:0022406	membrane docking	9/609	96/21069	0.00184516	0.0352955	0.0316671	VPS11/EXOC8/EXOC7/EXOC3/STX5/VPS18/BLOC1S6/STX10/USO1	9
medium	GO:0006275	regulation of DNA replication	12/609	156/21069	0.00196606	0.0367485	0.0329707	SMARCAL1/INO80E/WRNIP1/TFPT/ING5/MAP2K4/CIZ1/INO80C/NBN/UCHL5/ATF1/ZNF830	12
medium	GO:0051205	protein insertion into membrane	8/609	79/21069	0.00200201	0.0369976	0.0331942	TOMM40/NMT1/MTX2/TOMM70/EMC8/TRMT10B/CAMLG/TIMM29	8
medium	GO:0016447	somatic recombination of immunoglobulin gene segments	7/609	63/21069	0.00221848	0.0400919	0.0359704	CYREN/RNF8/SUPT6H/SLC15A4/NBN/ERCC1/EXOSC3	7
low	GO:0009451	RNA modification	8/46	183/21069	5.46967e-09	2.51058e-06	2.17635e-06	RPUSD2/MRM1/AARS2/MTO1/METTL16/TYW5/ADAT2/TRMT61B	8
low	GO:0140053	mitochondrial gene expression	7/46	176/21069	1.0243e-07	1.60997e-05	1.39564e-05	WARS2/FASTKD1/MTRF1/AARS2/MTIF2/MTO1/TRMT61B	7
low	GO:0006418	tRNA aminoacylation for protein translation	3/46	54/21069	0.000223458	0.00732623	0.00635091	WARS2/VARS2/AARS2	3
low	GO:0032259	methylation	6/46	422/21069	0.000296313	0.00755598	0.00655007	MRM1/ZNF274/MTO1/METTL16/SETD4/TRMT61B	6
low	GO:0042254	ribosome biogenesis	5/46	338/21069	0.000824469	0.0180205	0.0156215	RPUSD2/MRM1/METTL16/SPATA5L1/TRMT61B	5
a. Gene expression level: low (TMP <= 10), medium (10 < TPM <= 50), and high (TMP > 50)

## Sheet: Table S5
Table S5. Significantly enriched Gene Ontology terms for up-regulated genes in skin in buffalo and cattle.
Species	ID	Description	GeneRatio	BgRatio	pvalue	p.adjust	qvalue	geneID	Count
Buffalo	GO:0043588	skin development	56/517	330/21069	8.86024e-31	1.88324e-27	1.59997e-27	KRT85/HOXC13/TGM3/PPL/IRF6/MAFB/TGM1/APCDD1/SOSTDC1/ASPRV1/KRT17/CERS3/ARRDC3/KRT82/KRT80/GRHL1/KRT72/ACER1/AQP3/ZFP36/SFN/TMEM79/DNASE1L2/CSTA/SOX18/FA2H/GJB3/OVOL1/KRT79/CLDN1/LIPM/DSP/KLK5/TP63/KRT75/KRT7/DLX3/JUP/ITGB4/TXNIP/KRT10/CDSN/SOX21/ZFP36L1/CLDN4/KRT25/KRT27/KRT73/KRT5/KRT2/DSG4/KRT77/KRT1/SPRR4/KRT84/FLG2	56
Buffalo	GO:0030216	keratinocyte differentiation	38/517	179/21069	7.8876e-25	1.11767e-21	9.49557e-22	KRT85/TGM3/PPL/IRF6/MAFB/TGM1/KRT17/CERS3/KRT82/KRT80/GRHL1/KRT72/ACER1/AQP3/ZFP36/SFN/TMEM79/DNASE1L2/CSTA/KRT79/LIPM/DSP/KLK5/TP63/KRT75/KRT7/TXNIP/KRT10/CDSN/ZFP36L1/KRT73/KRT5/KRT2/DSG4/KRT77/KRT1/SPRR4/KRT84	38
Buffalo	GO:0045109	intermediate filament organization	25/517	78/21069	1.60402e-21	1.36374e-18	1.15861e-18	KRT85/KRT15/KRT19/DES/KRT17/KRT35/KRT82/KRT80/KRT14/KRT72/KRT79/DSP/KRT75/KRT7/KRT32/KRT25/KRT27/KRT73/KRT5/KRT2/KRT23/KRT77/KRT1/PKP1/KRT84	25
Buffalo	GO:0045103	intermediate filament-based process	27/517	102/21069	1.10723e-20	6.72403e-18	5.71263e-18	KRT85/PPL/KRT15/KRT19/DES/KRT17/KRT35/KRT82/KRT80/KRT14/KRT72/KRT79/DSP/KRT75/KRT7/KRT32/KRT25/KRT27/KRT73/KRT5/FAM83H/KRT2/KRT23/KRT77/KRT1/PKP1/KRT84	27
Buffalo	GO:0042303	molting cycle	18/517	126/21069	1.8758e-09	7.47479e-07	6.35046e-07	HOXC13/MPZL3/TGM3/APCDD1/SOSTDC1/KRT17/KRT14/TMEM79/DNASE1L2/SOX18/FA2H/TP63/DLX3/SOX21/KRT25/KRT27/DSG4/KRT84	18
Buffalo	GO:0042633	hair cycle	18/517	126/21069	1.8758e-09	7.47479e-07	6.35046e-07	HOXC13/MPZL3/TGM3/APCDD1/SOSTDC1/KRT17/KRT14/TMEM79/DNASE1L2/SOX18/FA2H/TP63/DLX3/SOX21/KRT25/KRT27/DSG4/KRT84	18
Buffalo	GO:0045216	cell-cell junction organization	24/517	226/21069	1.9342e-09	7.47479e-07	6.35046e-07	OCLN/HOPX/CDH5/GRHL1/PECAM1/CLDN1/DSG1/CD9/DSP/NECTIN1/CDH1/EFNB2/GJB2/JUP/F11R/RAMP2/MTSS1/CLDN5/CLDN4/F2RL1/GJB6/CLDN8/PKP1/PKP3	24
Buffalo	GO:0033561	regulation of water loss via skin	10/517	32/21069	2.88333e-09	1.02142e-06	8.67782e-07	GRHL1/ACER1/SFN/TMEM79/FA2H/CLDN1/TP63/CLDN4/KRT1/FLG2	10
Buffalo	GO:0001942	hair follicle development	15/517	99/21069	1.86648e-08	5.66743e-06	4.81496e-06	HOXC13/TGM3/APCDD1/SOSTDC1/KRT17/TMEM79/DNASE1L2/SOX18/TP63/DLX3/SOX21/KRT25/KRT27/DSG4/KRT84	15
Buffalo	GO:0043616	keratinocyte proliferation	11/517	57/21069	1.16204e-07	2.74436e-05	2.33156e-05	IRF6/TGM1/ZFP36/SFN/OVOL1/TP63/SLURP1/EFNB2/SDR16C5/ZFP36L1/KRT2	11
Buffalo	GO:0048730	epidermis morphogenesis	9/517	36/21069	1.5704e-07	3.5003e-05	2.9738e-05	TGM3/SOSTDC1/KRT17/TMEM79/TP63/DLX3/KRT25/KRT27/FLG2	9
Buffalo	GO:0019216	regulation of lipid metabolic process	28/517	371/21069	1.64681e-07	3.5003e-05	2.9738e-05	PPP2R5A/INSIG1/FMO2/PNPLA2/SERPINA12/FGFR3/SREBF1/ACER1/ABHD5/DAGLB/EGR1/APOE/CCL21/THRSP/NR1D1/ORMDL3/PDK4/SCARB1/CD74/EPHX2/RAB38/TSPO/IGFBP7/NPC2/APOD/HSD17B13/FABP5/CD81	28
Buffalo	GO:0050678	regulation of epithelial cell proliferation	30/517	438/21069	4.82271e-07	9.3188e-05	7.9171e-05	SERPINB5/IRF6/ECM1/TGM1/JUN/TACSTD2/CXCL12/F3/ZFP36/SFN/APOE/NR1D1/FA2H/OVOL1/CLDN1/TP63/SLURP1/EFNB2/GATA3/CDKN1B/MTSS1/TGFBR3/ZFP36L1/NFIB/SFRP1/EGFL7/FGFBP1/EMC10/NRARP/GPX1	30
Buffalo	GO:0001894	tissue homeostasis	24/517	303/21069	5.3167e-07	9.82666e-05	8.34856e-05	OCLN/LTF/RAB3D/ACP5/SLC39A8/S1PR1/CDH5/IL20RB/SLC2A1/CD34/CYTL1/HSPB1/PECAM1/RDH12/CLDN1/COL2A1/PDK4/IL20RA/HOMER2/F11R/CLDN5/AZGP1/GJB6/KRT1	24
Buffalo	GO:0052548	regulation of endopeptidase activity	32/517	498/21069	8.17675e-07	0.000129589	0.000110097	SPINT2/CST3/LTF/SERPINB5/PSMB8/LAPTM5/SERPINA12/S100A9/F3/CTSD/EGLN3/PRDX5/SFN/CSTA/VSIR/FAM162A/S100A8/TNFAIP8/TP63/SERPING1/SERPINA1/GSN/GAS6/EFNA1/EFNA3/SERPINB12/SERPINB13/SERPINB7/CST6/PRNP/GPX1/SOX7	32
Buffalo	GO:0045861	negative regulation of proteolysis	28/517	402/21069	8.35374e-07	0.000129589	0.000110097	SPINT2/CST3/GIPC1/LTF/SERPINB5/PI16/RPL23/ECM1/SERPINA12/IL1R2/GABARAPL2/PRDX5/SFN/CSTA/CTSB/TNFAIP8/SERPING1/SERPINA1/GAS6/EFNA1/NOP53/SERPINB12/SERPINB13/SERPINB7/CST6/GAS1/PRNP/GPX1	28
Buffalo	GO:0045682	regulation of epidermis development	11/517	69/21069	8.808e-07	0.000129589	0.000110097	GRHL1/AQP3/ZFP36/SFN/TMEM79/SFRP4/TP63/KRT10/ZFP36L1/KRT2/KRT84	11
Buffalo	GO:0007043	cell-cell junction assembly	17/517	168/21069	8.84046e-07	0.000129589	0.000110097	OCLN/HOPX/CDH5/PECAM1/CLDN1/DSG1/CD9/GJB2/JUP/F11R/RAMP2/CLDN5/CLDN4/GJB6/CLDN8/PKP1/PKP3	17
Buffalo	GO:0044406	adhesion of symbiont to host	6/517	16/21069	1.37776e-06	0.000195229	0.000165863	LTF/SCARB1/NECTIN1/GAS6/LRRC15/CD81	6
Buffalo	GO:0007568	aging	17/517	175/21069	1.56449e-06	0.000214537	0.000182267	FOS/PENK/C1QA/KRT14/SREBF1/CTSC/CLDN1/TP63/SERPING1/GJB2/TSPO/TGFBR2/APOD/KRT25/GJB6/JUND/GPX1	17
Buffalo	GO:0030104	water homeostasis	11/517	74/21069	1.80747e-06	0.000240111	0.000203994	GRHL1/ACER1/AQP3/SFN/TMEM79/FA2H/CLDN1/TP63/CLDN4/KRT1/FLG2	11
Buffalo	GO:0060249	anatomical structure homeostasis	25/517	362/21069	3.76159e-06	0.000456872	0.000388151	OCLN/LTF/RAB3D/ACP5/SLC39A8/S1PR1/CDH5/IL20RB/SLC2A1/CD34/CYTL1/HSPB1/PECAM1/RDH12/PLN/CLDN1/COL2A1/PDK4/IL20RA/HOMER2/F11R/CLDN5/AZGP1/GJB6/KRT1	25
Buffalo	GO:0050878	regulation of body fluid levels	28/517	437/21069	4.22015e-06	0.000498329	0.000423372	F3/EMP2/GRHL1/ACER1/AQP3/SFN/TMEM79/APOE/CD34/DDR1/HSPB1/FA2H/VWF/CLDN1/CD9/TP63/SERPING1/F11R/SERPINA1/GAS6/ZBTB7B/VAMP8/FCER1G/CLDN4/F2RL1/KRT1/ENTPD2/FLG2	28
Buffalo	GO:0051346	negative regulation of hydrolase activity	27/517	419/21069	5.63831e-06	0.000647796	0.000550356	SPINT2/CST3/LTF/SERPINB5/PI16/LGALS3/ECM1/SERPINA12/FZD10/PRDX5/SFN/CSTA/CTSB/TNFAIP8/SERPING1/F11R/TMBIM6/SERPINA1/GAS6/SPRY1/SERPINB12/SERPINB13/SERPINB7/CST6/PRNP/EGLN1/GPX1	27
Buffalo	GO:0010038	response to metal ion	25/517	383/21069	1.00248e-05	0.00112146	0.000952774	PPP2CA/TFAP2A/JUN/FOS/PENK/ACER1/AQP3/SLC40A1/SDC1/JUNB/CHP2/S100A8/CLDN1/S100A16/CD14/MT4/CDH1/EEF2K/TSPO/CDKN1B/TXNIP/TRPV6/FABP4/PRNP/JUND	25
Buffalo	GO:0031099	regeneration	17/517	203/21069	1.16367e-05	0.0012684	0.00107761	KLF5/HOPX/JUN/CXCL12/SRSF5/CLDN1/CD9/TSPO/CDKN1B/TGFBR2/GAS6/APOD/TGFBR3/KLK6/MUSTN1/CD81/GPX1	17
Buffalo	GO:0042246	tissue regeneration	10/517	74/21069	1.27558e-05	0.00132522	0.00112588	KLF5/HOPX/CD9/CDKN1B/TGFBR2/APOD/KLK6/MUSTN1/CD81/GPX1	10
Buffalo	GO:0098742	cell-cell adhesion via plasma-membrane adhesion molecules	21/517	293/21069	1.27814e-05	0.00132522	0.00112588	SPARCL1/SELE/CDH5/PECAM1/PCDH1/CLDN1/DSG1/DSC3/CEACAM19/NECTIN1/CDH1/EFNA5/NECTIN4/TGFBR2/DSC1/CLDN5/CLDN4/MPZL2/DSG3/CLDN8/DSG4	21
Buffalo	GO:1902105	regulation of leukocyte differentiation	24/517	382/21069	2.80107e-05	0.00258818	0.00219888	PRDM1/LTF/PGLYRP1/MAFB/ZFP36L2/FOS/CTNNBIP1/FGL2/HLA-DRA/VSIR/NFKBIZ/C1QC/JUNB/SLC46A2/TOB2/CD74/GATA3/TGFBR2/GAS6/PRXL2A/ZBTB7B/ZFP36L1/SFRP1/NRARP	24
Buffalo	GO:0006631	fatty acid metabolic process	26/517	434/21069	2.96252e-05	0.00262368	0.00222904	THEM5/TNXB/INSIG1/FMO2/MSMO1/ECHDC1/ACSL1/MIF/SREBF1/ABHD5/DAGLB/DBI/FA2H/PDK4/PTGDS/CD74/ELOVL4/ELOVL3/FASN/FADS6/GLYATL2/MCEE/FABP5/OLAH/GPX1/SCD	26
Buffalo	GO:0044403	biological process involved in symbiotic interaction	24/517	384/21069	3.04618e-05	0.00264272	0.00224521	LTF/PGLYRP1/JUN/APOE/CHMP5/CTSB/CLDN1/SCARB1/CD74/NECTIN1/FASN/EFNB2/LY6E/F11R/NECTIN4/IST1/GSN/GAS6/VAMP8/F2RL1/LRRC15/RAB5A/CD81/GPX1	24
Buffalo	GO:0018149	peptide cross-linking	7/517	38/21069	3.35563e-05	0.00284486	0.00241694	TGM3/TGM1/CSTA/DSP/KRT10/KRT2/KRT1	7
Buffalo	GO:0034612	response to tumor necrosis factor	21/517	313/21069	3.41302e-05	0.00284486	0.00241694	ZFP36L2/FOS/PLVAP/LAPTM5/NPNT/SELE/ZFP36/CCL21/CCL14/NR1D1/CLDN1/CD14/GATA3/CHI3L1/GAS6/TNFRSF21/ZFP36L1/SFRP1/F2RL1/FABP4/KLF2	21
Buffalo	GO:0007565	female pregnancy	16/517	200/21069	3.66859e-05	0.00299908	0.00254797	PRDM1/FOS/ARHGDIB/EMP2/SLC2A1/DDR1/JUNB/ENDOU/CTSB/DSG1/GJB2/ITGB4/RPL29/IGFBP7/TGFBR2/CLDN4	16
Buffalo	GO:0090207	regulation of triglyceride metabolic process	8/517	53/21069	4.18046e-05	0.00329095	0.00279593	PNPLA2/SERPINA12/SREBF1/ABHD5/DAGLB/APOE/THRSP/SCARB1	8
Buffalo	GO:0032570	response to progesterone	7/517	40/21069	4.75144e-05	0.00354357	0.00301056	FOS/SREBF1/DSG1/GJB2/TSPO/TXNIP/CLDN4	7
Buffalo	GO:0032703	negative regulation of interleukin-2 production	7/517	40/21069	4.75144e-05	0.00354357	0.00301056	LAPTM5/IL20RB/ZFP36/CD34/GATA3/HOMER2/PRNP	7
Buffalo	GO:0006641	triglyceride metabolic process	12/517	123/21069	5.11411e-05	0.0035918	0.00305154	TNXB/INSIG1/ACSL1/PNPLA2/SERPINA12/SREBF1/ABHD5/DAGLB/APOE/THRSP/SCARB1/GPX1	12
Buffalo	GO:0071772	response to BMP	15/517	184/21069	5.14254e-05	0.0035918	0.00305154	SPINT2/TOB1/BAMBI/FAM83G/SOSTDC1/CDH5/EGR1/COL2A1/SFRP4/GATA3/DLX3/PDCD4/TGFBR3/SFRP1/DSG4	15
Buffalo	GO:0071773	cellular response to BMP stimulus	15/517	184/21069	5.14254e-05	0.0035918	0.00305154	SPINT2/TOB1/BAMBI/FAM83G/SOSTDC1/CDH5/EGR1/COL2A1/SFRP4/GATA3/DLX3/PDCD4/TGFBR3/SFRP1/DSG4	15
Buffalo	GO:0003158	endothelium development	14/517	163/21069	5.15408e-05	0.0035918	0.00305154	S1PR1/CDH5/SLC40A1/CD34/SOX18/PECAM1/CLDN1/FASN/F11R/BTG1/CLDN5/COL18A1/F2RL1/GPX1	14
Buffalo	GO:0016055	Wnt signaling pathway	27/517	480/21069	6.17811e-05	0.00416875	0.0035417	PPP2CA/NDRG2/GID8/BAMBI/APCDD1/SOSTDC1/HBP1/CTNNBIP1/FZD10/PFDN5/EGR1/APOE/SDC1/SLC9A3R1/PLPP3/CPZ/SFRP4/GATA3/DLX3/JUP/SHISA2/MDFI/MYOC/SFRP1/NRARP/RAB5A/SOX7	27
Buffalo	GO:0036294	cellular response to decreased oxygen levels	14/517	166/21069	6.29015e-05	0.00417803	0.00354959	FOS/EGLN3/AQP3/EGR1/CD34/FAM162A/EEF2K/CDKN1B/TMBIM6/NOP53/ZFP36L1/SFRP1/JUND/EGLN1	14
Buffalo	GO:0198738	cell-cell signaling by wnt	27/517	482/21069	6.62598e-05	0.00430604	0.00365834	PPP2CA/NDRG2/GID8/BAMBI/APCDD1/SOSTDC1/HBP1/CTNNBIP1/FZD10/PFDN5/EGR1/APOE/SDC1/SLC9A3R1/PLPP3/CPZ/SFRP4/GATA3/DLX3/JUP/SHISA2/MDFI/MYOC/SFRP1/NRARP/RAB5A/SOX7	27
Buffalo	GO:0007162	negative regulation of cell adhesion	23/517	378/21069	6.68545e-05	0.00430604	0.00365834	SPINT2/LGALS3/TACSTD2/CXCL12/LAPTM5/EPCAM/IL20RB/FGL2/CCL21/ERBB3/VSIR/CD9/CD74/PLET1/CDH1/EFNA5/TNFRSF21/MYOC/ZBTB7B/CDSN/APOD/NRARP/PRNP	23
Buffalo	GO:0071248	cellular response to metal ion	16/517	211/21069	6.97952e-05	0.00442835	0.00376225	TFAP2A/JUN/FOS/ACER1/SLC40A1/JUNB/CHP2/CLDN1/MT4/CDH1/EEF2K/TSPO/CDKN1B/FABP4/PRNP/JUND	16
Buffalo	GO:0042632	cholesterol homeostasis	11/517	110/21069	8.34258e-05	0.00513976	0.00436665	INSIG1/MYLIP/TMEM97/APOE/NR1D1/SCARB1/EPHX2/TSPO/NPC2/MALL/FABP4	11
Buffalo	GO:0055076	transition metal ion homeostasis	13/517	150/21069	8.64822e-05	0.00518722	0.00440698	LTF/SLC31A2/SLC39A8/S100A9/SLC40A1/S100A8/MT4/SCARA5/CYB561/FBXL5/HEPHL1/PRNP/EGLN1	13
Buffalo	GO:1901654	response to ketone	16/517	215/21069	8.71487e-05	0.00518722	0.00440698	FOS/SREBF1/CCL21/POSTN/CLDN1/DSG1/EFNA5/GJB2/TSPO/IGFBP7/GAS6/TXNIP/TGFBR3/CLDN4/SFRP1/KLF2	16
Buffalo	GO:0071356	cellular response to tumor necrosis factor	19/517	286/21069	9.09901e-05	0.00522701	0.00444078	ZFP36L2/FOS/PLVAP/LAPTM5/NPNT/ZFP36/CCL21/CCL14/NR1D1/CLDN1/GATA3/CHI3L1/GAS6/TNFRSF21/ZFP36L1/SFRP1/F2RL1/FABP4/KLF2	19
Buffalo	GO:0001890	placenta development	13/517	153/21069	0.000105812	0.00576677	0.00489936	SPINT2/PRDM1/KRT19/GJB5/JUNB/CTSB/GJB3/DLX3/GJB2/CDKN1B/MDFI/ZFP36L1/EGLN1	13
Buffalo	GO:0010631	epithelial cell migration	23/517	393/21069	0.000119651	0.00635796	0.00540162	GIPC1/JUN/TACSTD2/CLEC14A/EMP2/CDH5/ARSB/APOE/PLPP3/SOX18/HSPB1/SCARB1/EFNB2/GATA3/JUP/RAB25/TGFBR2/EFNA1/FGFBP1/S100A2/KRT2/EMC10/GPX1	23
Buffalo	GO:0090132	epithelium migration	23/517	396/21069	0.000133843	0.00685502	0.00582391	GIPC1/JUN/TACSTD2/CLEC14A/EMP2/CDH5/ARSB/APOE/PLPP3/SOX18/HSPB1/SCARB1/EFNB2/GATA3/JUP/RAB25/TGFBR2/EFNA1/FGFBP1/S100A2/KRT2/EMC10/GPX1	23
Buffalo	GO:0032496	response to lipopolysaccharide	23/517	398/21069	0.000144116	0.00720749	0.00612337	LTF/FOS/ACP5/PENK/LITAF/S100A9/SELE/MIF/ZFP36/NR1D1/CHMP5/S100A8/CLDN1/SCARB1/CD14/EFNB2/GJB2/IL1F10/TSPO/PDCD4/GJB6/IL36RN/JUND	23
Buffalo	GO:2000107	negative regulation of leukocyte apoptotic process	8/517	63/21069	0.000147425	0.00723178	0.006144	CXCL12/MIF/CCL21/SLC46A2/ORMDL3/CD74/GAS6/EFNA1	8
Buffalo	GO:0006665	sphingolipid metabolic process	14/517	180/21069	0.000149705	0.00723178	0.006144	PPP2CA/GLTP/CERS3/CPTP/ACER1/DEGS2/PLPP3/ALDH3B2/FA2H/ORMDL3/ELOVL4/ELOVL3/SERINC2/SPTSSB	14
Buffalo	GO:0060317	cardiac epithelial to mesenchymal transition	6/517	34/21069	0.000158984	0.00742683	0.00630971	EMP2/PDCD4/TGFBR2/EFNA1/SPRY1/TGFBR3	6
Buffalo	GO:0001570	vasculogenesis	9/517	81/21069	0.000163696	0.00748251	0.00635701	EMP2/CD34/SOX18/JUNB/TGFBR2/RAMP2/TGFBR3/ZFP36L1/EGFL7	9
Buffalo	GO:0002286	T cell activation involved in immune response	12/517	141/21069	0.000190392	0.00834603	0.00709065	LGALS3/FGL2/HLA-DRA/NFKBIZ/JUNB/HLA-DMB/CD74/GATA3/ZBTB7B/FCER1G/F2RL1/CD81	12
Buffalo	GO:0044706	multi-multicellular organism process	16/517	230/21069	0.000190441	0.00834603	0.00709065	PRDM1/FOS/ARHGDIB/EMP2/SLC2A1/DDR1/JUNB/ENDOU/CTSB/DSG1/GJB2/ITGB4/RPL29/IGFBP7/TGFBR2/CLDN4	16
Buffalo	GO:0046916	cellular transition metal ion homeostasis	11/517	121/21069	0.000196266	0.00839652	0.00713354	SLC31A2/SLC39A8/S100A9/SLC40A1/S100A8/MT4/SCARA5/CYB561/HEPHL1/PRNP/EGLN1	11
Buffalo	GO:0072659	protein localization to plasma membrane	19/517	311/21069	0.00026789	0.0106986	0.00908933	PPP2R5A/RAB10/RAB3D/LGALS3/PIK3R2/EMP2/SLC9A3R1/ATP1B3/CDH1/JUP/F11R/RAMP2/GAS6/VAMP8/LRRC15/CD81/PKP3/PRNP/VAMP2	19
Buffalo	GO:0009636	response to toxic substance	18/517	286/21069	0.000269289	0.0106986	0.00908933	FOS/PENK/S100A9/MGST1/PRDX5/APOE/SDC1/RDH12/CLDN1/MT4/EPHX2/CDH1/PRXL2A/MGST2/PON3/GPX3/GPX1/SNN	18
Buffalo	GO:1904035	regulation of epithelial cell apoptotic process	11/517	127/21069	0.000299819	0.0115866	0.00984382	CDH5/ZFP36/SFRP4/GATA3/CDKN1B/PDCD4/RAMP2/GSN/GAS6/ZFP36L1/SERPINB13	11
Buffalo	GO:0072091	regulation of stem cell proliferation	9/517	88/21069	0.000308206	0.0116141	0.00986717	IRF6/EPCAM/SFN/SOX18/OVOL1/TP63/TGFBR2/ZFP36L1/NFIB	9
Buffalo	GO:0036293	response to decreased oxygen levels	20/517	341/21069	0.000317638	0.0117748	0.0100036	FOS/PENK/CXCL12/EGLN3/AQP3/SLC2A1/EGR1/CD34/FAM162A/EEF2K/AHCY/CDKN1B/TMBIM6/TGFBR2/NOP53/TGFBR3/ZFP36L1/SFRP1/JUND/EGLN1	20
Buffalo	GO:0043114	regulation of vascular permeability	7/517	54/21069	0.000335753	0.0120957	0.0102763	OCLN/PLVAP/CTNNBIP1/CDH5/APOE/RAMP2/CLDN5	7
Buffalo	GO:0048013	ephrin receptor signaling pathway	7/517	54/21069	0.000335753	0.0120957	0.0102763	EPHA1/EFNA4/EPHB6/EFNA5/EFNB2/EFNA1/EFNA3	7
Buffalo	GO:0002573	myeloid leukocyte differentiation	17/517	267/21069	0.000345644	0.0123169	0.0104642	LTF/MAFB/JUN/FOS/CTNNBIP1/C1QC/JUNB/TOB2/CD74/FASN/GATA3/TGFBR2/PRXL2A/ZFP36L1/SFRP1/F2RL1/CD81	17
Buffalo	GO:0045229	external encapsulating structure organization	21/517	371/21069	0.00036502	0.0127188	0.0108057	SPINT2/CST3/MPZL3/TNXB/TGM3/SERPINB5/COL17A1/TGM1/SLC39A8/MFAP4/NPNT/DDR1/POSTN/COL2A1/KLK5/CTSV/CTSS/MATN2/RAMP2/GAS6/COL18A1	21
Buffalo	GO:0035336	long-chain fatty-acyl-CoA metabolic process	5/517	26/21069	0.00037458	0.0129458	0.0109986	THEM5/ACSL1/FAR2/ELOVL4/ELOVL3	5
Buffalo	GO:0140467	integrated stress response signaling	6/517	40/21069	0.000400661	0.0134111	0.0113938	MAFB/JUN/NFE2L3/FOS/JUNB/CEBPD	6
Buffalo	GO:0072073	kidney epithelium development	12/517	154/21069	0.000429639	0.014167	0.0120361	TACSTD2/CTNNBIP1/EPCAM/NPNT/CD34/SDC1/PECAM1/EFNB2/GATA3/MTSS1/SPRY1/SFRP1	12
Buffalo	GO:0007160	cell-matrix adhesion	17/517	273/21069	0.000446141	0.0145888	0.0123944	TNXB/COL17A1/EPHA1/NPNT/EMP2/BCAM/CCL21/CD34/DDR1/PLET1/EFNA5/JUP/LYPD3/ITGB4/MYOC/APOD/SFRP1	17
Buffalo	GO:0050900	leukocyte migration	24/517	459/21069	0.000455555	0.0146713	0.0124645	LGALS3/ECM1/CXCL12/PLVAP/S1PR1/S100A9/EMP2/SELE/MIF/CCL21/CD34/CCL14/PECAM1/S100A8/CD9/CD74/GATA3/F11R/GAS6/APOD/FCER1G/F2RL1/XG/CD81	24
Buffalo	GO:1904019	epithelial cell apoptotic process	12/517	155/21069	0.000455566	0.0146713	0.0124645	CDH5/ZFP36/SFRP4/GATA3/CDKN1B/PDCD4/TGFBR2/RAMP2/GSN/GAS6/ZFP36L1/SERPINB13	12
Buffalo	GO:0045765	regulation of angiogenesis	21/517	381/21069	0.000517272	0.0161686	0.0137365	ECM1/EPHA1/F3/EMP2/CDH5/CD34/HSPB1/ISM1/JUP/CHI3L1/TGFBR2/RAMP2/EFNA1/BTG1/CLDN5/SFRP1/EFNA3/EMC10/KRT1/KLF2/EGLN1	21
Buffalo	GO:0060343	trabecula formation	5/517	28/21069	0.000537481	0.0166271	0.0141261	SLC40A1/CHAD/TGFBR3/SFRP1/EGLN1	5
Buffalo	GO:0010719	negative regulation of epithelial to mesenchymal transition	6/517	43/21069	0.000598064	0.0178202	0.0151398	PPP2CA/ZNF750/GATA3/EFNA1/SPRY1/SFRP1	6
Buffalo	GO:0030098	lymphocyte differentiation	24/517	468/21069	0.000599457	0.0178202	0.0151398	PRDM1/PIK3R2/PGLYRP1/MAFB/ZFP36L2/TPD52/FGL2/EGR1/HLA-DRA/VSIR/NFKBIZ/JUNB/SLC46A2/CD74/GATA3/TGFBR2/GAS6/ZBTB7B/FCER1G/ZFP36L1/SFRP1/LY6D/NRARP/IRF2BP2	24
Buffalo	GO:0072012	glomerulus vasculature development	5/517	29/21069	0.000636477	0.0184059	0.0156373	EGR1/CD34/PECAM1/SERPINB7/NOTCH3	5
Buffalo	GO:0042476	odontogenesis	11/517	139/21069	0.000647699	0.0186038	0.0158055	TFAP2A/SP6/APCDD1/SOSTDC1/AQP3/CD34/SDC1/KLK5/TP63/NECTIN1/DLX3	11
Buffalo	GO:1900153	positive regulation of nuclear-transcribed mRNA catabolic process, deadenylation-dependent decay	4/517	17/21069	0.000661446	0.0188712	0.0160327	TOB1/ZFP36L2/ZFP36/ZFP36L1	4
Buffalo	GO:0006826	iron ion transport	7/517	61/21069	0.000713775	0.0202284	0.0171857	LTF/SLC39A8/SLC40A1/PGRMC2/NECTIN1/SCARA5/HEPHL1	7
Buffalo	GO:0044000	movement in host	15/517	236/21069	0.000770407	0.0214052	0.0181855	CHMP5/CTSB/CLDN1/SCARB1/CD74/NECTIN1/EFNB2/LY6E/F11R/NECTIN4/IST1/GSN/GAS6/VAMP8/CD81	15
Buffalo	GO:0007584	response to nutrient	12/517	165/21069	0.00079572	0.021965	0.0186611	ACSL1/PENK/ARSB/AQP3/POSTN/RXRA/TSPO/AHCY/TGFBR2/GAS6/SFRP1/GPX1	12
Buffalo	GO:0006066	alcohol metabolic process	21/517	395/21069	0.000821715	0.0225362	0.0191464	INSIG1/MSMO1/IDI1/PNPLA2/SERPINA12/CYP11A1/SREBF1/ACER1/ALDH2/DEGS2/APOE/PLPP3/ALDH3B2/RDH12/SDR9C7/CYP27A1/SCARB1/EPHX2/SDR16C5/NPC2/SPTSSB	21
Buffalo	GO:0071295	cellular response to vitamin	5/517	31/21069	0.000874648	0.023192	0.0197035	PENK/POSTN/RXRA/GAS6/SFRP1	5
Buffalo	GO:0072089	stem cell proliferation	10/517	123/21069	0.000915903	0.024034	0.0204189	IRF6/EPCAM/SFN/CD34/SOX18/OVOL1/TP63/TGFBR2/ZFP36L1/NFIB	10
Buffalo	GO:0070293	renal absorption	5/517	32/21069	0.00101594	0.0264955	0.0225101	AQP3/SLC9A3R1/GSN/GAS6/CLDN4	5
Buffalo	GO:2000269	regulation of fibroblast apoptotic process	4/517	20/21069	0.0012702	0.030855	0.0262139	TP63/GAS6/BTG1/SFRP1	4
Buffalo	GO:0008203	cholesterol metabolic process	11/517	151/21069	0.00128124	0.0309462	0.0262914	INSIG1/MSMO1/IDI1/SERPINA12/CYP11A1/SREBF1/APOE/CYP27A1/SCARB1/EPHX2/NPC2	11
Buffalo	GO:0071887	leukocyte apoptotic process	10/517	129/21069	0.00131842	0.0314866	0.0267505	LGALS3/CXCL12/MIF/CCL21/SLC46A2/ORMDL3/CD74/GAS6/TNFRSF21/EFNA1	10
Buffalo	GO:0045444	fat cell differentiation	16/517	275/21069	0.00133139	0.0314883	0.0267519	INSIG1/KLF5/ARL4A/PSMB8/MAFB/ZFP36L2/SREBF1/ZFP36/NR1D1/GATA3/ZBTB7B/ZFP36L1/SFRP1/FABP4/CEBPD/GPX1	16
Buffalo	GO:0061383	trabecula morphogenesis	6/517	50/21069	0.00134915	0.0315124	0.0267724	S1PR1/SLC40A1/CHAD/TGFBR3/SFRP1/EGLN1	6
Buffalo	GO:0120009	intermembrane lipid transfer	6/517	50/21069	0.00134915	0.0315124	0.0267724	GLTP/CPTP/APOE/STARD5/TSPO/NPC2	6
Buffalo	GO:0003093	regulation of glomerular filtration	3/517	10/21069	0.00154995	0.0341391	0.029004	EMP2/GAS6/F2RL1	3
Buffalo	GO:0035878	nail development	3/517	10/21069	0.00154995	0.0341391	0.029004	HOXC13/ITGB4/KRT84	3
Buffalo	GO:0046718	viral entry into host cell	13/517	203/21069	0.00158046	0.0344541	0.0292716	CTSB/CLDN1/SCARB1/CD74/NECTIN1/EFNB2/LY6E/F11R/NECTIN4/GSN/GAS6/VAMP8/CD81	13
Buffalo	GO:0042552	myelination	11/517	156/21069	0.0016645	0.0361009	0.0306707	CTSC/MAL2/FA2H/ORMDL3/CD9/ITGB4/TNFRSF21/MYOC/CLDN5/MALL/KLK6	11
Buffalo	GO:0015909	long-chain fatty acid transport	7/517	71/21069	0.00176402	0.0375999	0.0319443	ACSL1/PLIN2/MIF/SLC2A1/APOE/FABP4/FABP5	7
Buffalo	GO:0030193	regulation of blood coagulation	7/517	71/21069	0.00176402	0.0375999	0.0319443	F3/APOE/CD34/CD9/SERPING1/F2RL1/KRT1	7
Buffalo	GO:1902895	positive regulation of miRNA transcription	6/517	54/21069	0.00201946	0.0408292	0.0346878	KLF5/JUN/FOS/SREBF1/EGR1/GATA3	6
Buffalo	GO:1900046	regulation of hemostasis	7/517	73/21069	0.00207264	0.0409921	0.0348262	F3/APOE/CD34/CD9/SERPING1/F2RL1/KRT1	7
Buffalo	GO:0002604	regulation of dendritic cell antigen processing and presentation	3/517	11/21069	0.00209252	0.0409921	0.0348262	FGL2/CCL21/CD74	3
Buffalo	GO:0006707	cholesterol catabolic process	3/517	11/21069	0.00209252	0.0409921	0.0348262	APOE/CYP27A1/SCARB1	3
Buffalo	GO:0016127	sterol catabolic process	3/517	11/21069	0.00209252	0.0409921	0.0348262	APOE/CYP27A1/SCARB1	3
Buffalo	GO:0098883	synapse pruning	3/517	11/21069	0.00209252	0.0409921	0.0348262	C1QA/C1QC/C1QB	3
Buffalo	GO:0001952	regulation of cell-matrix adhesion	10/517	139/21069	0.00230088	0.0444592	0.0377718	EPHA1/EMP2/CCL21/DDR1/PLET1/EFNA5/JUP/MYOC/APOD/SFRP1	10
Buffalo	GO:0032623	interleukin-2 production	7/517	75/21069	0.00242141	0.0463668	0.0393924	LAPTM5/IL20RB/ZFP36/CD34/GATA3/HOMER2/PRNP	7
Buffalo	GO:0150105	protein localization to cell-cell junction	4/517	24/21069	0.00257789	0.0491417	0.04175	CDH5/PECAM1/DSP/F11R	4
Buffalo	GO:0050818	regulation of coagulation	7/517	76/21069	0.0026119	0.0494425	0.0420056	F3/APOE/CD34/CD9/SERPING1/F2RL1/KRT1	7
Cattle	GO:0030199	collagen fibril organization	23/448	82/21069	8.18374e-20	3.3807e-16	2.78506e-16	PLOD3/BMP1/LUM/LOXL2/LOXL1/CYP1B1/EMILIN1/FKBP10/AEBP1/LOX/COL1A1/FMOD/SFRP2/COL12A1/LOXL4/COL11A1/EFEMP2/P3H4/COL5A2/P4HA1/COL5A1/GREM1/PXDN	23
Cattle	GO:0031589	cell-substrate adhesion	37/448	411/21069	1.51905e-13	1.25504e-10	1.03391e-10	ILK/PARVA/AKIP1/THBS1/AXL/NTN4/FBLN2/PEAK1/P4HB/ACTG1/CCN2/NID1/FN1/ITGA11/CCN1/ITGB3/FLNA/EMILIN1/LAMB1/COL1A1/ITGA5/ITGB5/SERPINE1/FERMT2/DLC1/ITGB1/ADAM9/ZYX/FBLN5/ACTN1/DAPK3/EFEMP2/NID2/TLN1/RSU1/CDH13/GREM1	37
Cattle	GO:0001503	ossification	39/448	477/21069	6.9902e-13	4.81275e-10	3.96479e-10	TNC/ILK/CCN4/BMP1/IARS1/FHL2/FZD1/PTN/FSTL3/TPM4/CLEC11A/CREB3L1/CCN2/RFLNB/CHSY1/ITGA11/CCN1/ASPN/LOX/COL1A1/SNAI2/SMO/PTGS2/FERMT2/VEGFC/VCAN/DCHS1/MRC2/SFRP2/MMP2/PKDCC/CTSK/COL11A1/COL5A2/ID3/SMOC1/CDH11/CTHRC1/GREM1	39
Cattle	GO:0007178	transmembrane receptor protein serine/threonine kinase signaling pathway	34/448	415/21069	2.09854e-11	1.23844e-08	1.02024e-08	ILK/PARP1/LRRC32/THBS1/CCN3/FZD1/FBN1/TGFB1I1/RBBP7/FSTL3/FST/DKK3/HSPA5/NOTCH2/HTRA1/CCN1/LRP1/EMILIN1/ASPN/RGMB/LOX/ITGB5/FERMT2/FMOD/ADAM9/ZYX/VIM/SFRP2/LTBP2/FSTL1/VASN/HTRA3/INHBA/GREM1	34
Cattle	GO:0032964	collagen biosynthetic process	12/448	51/21069	5.53061e-10	2.53855e-07	2.09128e-07	LARP6/CREB3L1/CCN2/ERRFI1/EMILIN1/COL1A1/VIM/PCOLCE/RCN3/P3H4/COL5A1/INHBA	12
Cattle	GO:0032963	collagen metabolic process	17/448	121/21069	7.98867e-10	3.30012e-07	2.71867e-07	PLOD3/LARP6/CREB3L1/CCN2/ERRFI1/EMILIN1/COL1A1/MRC2/ITGB1/VIM/MMP2/PCOLCE/CTSK/RCN3/P3H4/COL5A1/INHBA	17
Cattle	GO:0010810	regulation of cell-substrate adhesion	23/448	239/21069	1.87304e-09	6.44794e-07	5.31187e-07	ILK/THBS1/FBLN2/PEAK1/P4HB/ACTG1/NID1/FN1/CCN1/ITGB3/FLNA/EMILIN1/COL1A1/ITGA5/SERPINE1/FERMT2/DLC1/DAPK3/EFEMP2/TLN1/RSU1/CDH13/GREM1	23
Cattle	GO:0033627	cell adhesion mediated by integrin	14/448	90/21069	6.54238e-09	2.07897e-06	1.71267e-06	CCN3/FBN1/EMILIN2/ITGA11/ITGB3/CYP1B1/EMILIN1/SNAI2/ITGA5/ITGB5/SERPINE1/ITGB1/ADAM9/SFRP2	14
Cattle	GO:0009612	response to mechanical stimulus	21/448	227/21069	1.91584e-08	5.20316e-06	4.28641e-06	MAP1B/THBS1/PTN/IGFBP2/ACTG1/FOSL1/GPI/MTPN/SERPINE2/ITGB3/ANKRD1/CAPN2/PSPH/COL1A1/GADD45A/PTGS2/MMP2/PKD2/CNN2/COL11A1/TMEM150C	21
Cattle	GO:0007015	actin filament organization	32/448	488/21069	2.01526e-08	5.20316e-06	4.28641e-06	ARHGEF2/HSP90B1/ACTR3/TPM4/ACTG1/CCN2/SYNPO2/RFLNB/MTPN/DPYSL3/PFN2/FLNA/MYO1B/TPM2/PLS3/LIMA1/HAX1/WDR1/ITGB5/CALD1/RHOC/FERMT2/MICAL2/CFL2/MYO1D/DLC1/ZYX/ACTN1/FAT1/CDC42EP3/RND3/MSRB1	32
Cattle	GO:0001649	osteoblast differentiation	23/448	282/21069	4.3086e-08	1.0214e-05	8.41439e-06	TNC/ILK/CCN4/IARS1/FHL2/FZD1/TPM4/CREB3L1/ITGA11/CCN1/LOX/COL1A1/SNAI2/SMO/FERMT2/VEGFC/VCAN/MRC2/SFRP2/ID3/SMOC1/CTHRC1/GREM1	23
Cattle	GO:0071560	cellular response to transforming growth factor beta stimulus	23/448	284/21069	4.9073e-08	1.06695e-05	8.78963e-06	PARP1/LRRC32/THBS1/FBN1/TGFB1I1/RBBP7/DKK3/HSPA5/HTRA1/EMILIN1/ANKRD1/ASPN/LOX/COL1A1/ITGB5/FERMT2/FMOD/ADAM9/ZYX/CTSK/LTBP2/VASN/HTRA3	23
Cattle	GO:0018126	protein hydroxylation	8/448	27/21069	6.11398e-08	1.20271e-05	9.90802e-06	PLOD3/P4HA2/PLOD1/P4HB/PLOD2/FKBP10/P3H4/P4HA1	8
Cattle	GO:0071559	response to transforming growth factor beta	23/448	290/21069	7.1973e-08	1.35146e-05	1.11334e-05	PARP1/LRRC32/THBS1/FBN1/TGFB1I1/RBBP7/DKK3/HSPA5/HTRA1/EMILIN1/ANKRD1/ASPN/LOX/COL1A1/ITGB5/FERMT2/FMOD/ADAM9/ZYX/CTSK/LTBP2/VASN/HTRA3	23
Cattle	GO:0008360	regulation of cell shape	17/448	171/21069	1.54293e-07	2.65577e-05	2.18785e-05	PARVA/MSN/FN1/MYH9/WDR1/RHOQ/RHOC/FERMT2/DLC1/FMNL3/FBLIM1/DAPK3/MYH10/CDC42EP3/ATP10A/CCL2/RND3	17
Cattle	GO:0006418	tRNA aminoacylation for protein translation	10/448	54/21069	1.77215e-07	2.81567e-05	2.31958e-05	IARS1/WARS1/EPRS1/SARS1/TARS1/YARS1/MARS1/GARS1/NARS1/AARS1	10
Cattle	GO:0007599	hemostasis	21/448	263/21069	2.38666e-07	3.39976e-05	2.80076e-05	ILK/THBS1/AXL/EMILIN2/ACTG1/GPI/LMAN1/FN1/SERPINE2/ITGB3/MYH9/FLNA/EMILIN1/PLAUR/SERPINE1/TBXA2R/CSRP1/ANXA5/TLN1/ACTB/GNAS	21
Cattle	GO:0035987	endodermal cell differentiation	10/448	56/21069	2.5386e-07	3.49566e-05	2.87976e-05	FN1/LAMB1/ITGA5/ITGB5/MMP2/COL12A1/COL11A1/COL5A2/COL5A1/INHBA	10
Cattle	GO:0043039	tRNA aminoacylation	10/448	57/21069	3.02086e-07	3.99492e-05	3.29105e-05	IARS1/WARS1/EPRS1/SARS1/TARS1/YARS1/MARS1/GARS1/NARS1/AARS1	10
Cattle	GO:0070527	platelet aggregation	12/448	87/21069	3.09459e-07	3.99492e-05	3.29105e-05	ILK/EMILIN2/ACTG1/FN1/SERPINE2/ITGB3/MYH9/FLNA/CSRP1/TLN1/ACTB/GNAS	12
Cattle	GO:0050817	coagulation	20/448	261/21069	8.85217e-07	9.14208e-05	7.53133e-05	ILK/THBS1/AXL/EMILIN2/ACTG1/LMAN1/FN1/SERPINE2/ITGB3/MYH9/FLNA/EMILIN1/PLAUR/SERPINE1/TBXA2R/CSRP1/ANXA5/TLN1/ACTB/GNAS	20
Cattle	GO:0034109	homotypic cell-cell adhesion	13/448	114/21069	9.42986e-07	9.50116e-05	7.82715e-05	ILK/EMILIN2/ACTG1/FN1/SERPINE2/ITGB3/MYH9/FLNA/PLAUR/CSRP1/TLN1/ACTB/GNAS	13
Cattle	GO:0003007	heart morphogenesis	20/448	264/21069	1.05851e-06	0.000101926	8.39675e-05	RBP4/ILK/PARVA/FHL2/FZD1/SEMA3C/NOTCH2/CCN1/FLNA/ANKRD1/SNAI2/SMO/MICAL2/DCHS1/DLC1/SFRP2/PKD2/COL11A1/FLRT2/COL5A1	20
Cattle	GO:0061448	connective tissue development	21/448	288/21069	1.06096e-06	0.000101926	8.39675e-05	CCN4/BMP1/CCN3/PRRX1/BGN/LOXL2/CCN2/RFLNB/CHSY1/CCN1/ITGB3/LOX/COL1A1/SNAI2/SFRP2/PKDCC/CTSK/COL11A1/SELENOM/COL5A1/GREM1	21
Cattle	GO:1903036	positive regulation of response to wounding	11/448	81/21069	1.1303e-06	0.00010612	8.74223e-05	CCN4/THBS1/PTN/EMILIN2/ACTG1/FLNA/EMILIN1/SERPINE1/FERMT2/TBXA2R/ITGB1	11
Cattle	GO:0016055	Wnt signaling pathway	28/448	480/21069	1.63938e-06	0.000147223	0.000121284	ILK/CCN4/AMOTL2/NXN/FZD1/TGFB1I1/DKK3/CCNY/IGFBP2/RSPO3/IGFBP4/LRP1/COL1A1/SNAI2/FERMT2/CCNYL1/CCND1/TBX18/SFRP2/APC/PKD2/DAPK3/GPC4/RUVBL1/CTHRC1/CDK14/GREM1/FZD8	28
Cattle	GO:0007044	cell-substrate junction assembly	12/448	102/21069	1.7683e-06	0.000152943	0.000125996	THBS1/PEAK1/ACTG1/FN1/ITGB3/ITGA5/FERMT2/DLC1/ACTN1/DAPK3/TLN1/GREM1	12
Cattle	GO:0198738	cell-cell signaling by wnt	28/448	482/21069	1.77712e-06	0.000152943	0.000125996	ILK/CCN4/AMOTL2/NXN/FZD1/TGFB1I1/DKK3/CCNY/IGFBP2/RSPO3/IGFBP4/LRP1/COL1A1/SNAI2/FERMT2/CCNYL1/CCND1/TBX18/SFRP2/APC/PKD2/DAPK3/GPC4/RUVBL1/CTHRC1/CDK14/GREM1/FZD8	28
Cattle	GO:0090130	tissue migration	25/448	401/21069	1.83687e-06	0.00015486	0.000127575	THBS1/CCN3/PTN/LOXL2/VSTM4/GPI/ANLN/KANK2/SERPINF1/ITGB3/MYH9/CYP1B1/PFN2/SNAI2/GADD45A/PTGS2/VEGFC/TBXA2R/ACTG2/ITGB1/ADAM9/FSTL1/CDH13/GREM1/FGF7	25
Cattle	GO:0030865	cortical cytoskeleton organization	10/448	69/21069	1.8947e-06	0.00015654	0.000128959	ANLN/RACGAP1/WDR1/RHOQ/RHOC/FMNL3/CAVIN3/EHD2/TLN1/RND3	10
Cattle	GO:0045765	regulation of angiogenesis	24/448	381/21069	2.47095e-06	0.000200147	0.000164883	PGK1/PKM/THBS1/EMILIN2/WARS1/CREB3L1/SERPINF1/ITGB3/CYP1B1/EMILIN1/SARS1/ITGA5/GADD45A/SERPINE1/VEGFC/TBXA2R/ITGB1/SFRP2/HSPB6/MYDGF/THBS2/DDAH1/RNH1/GREM1	24
Cattle	GO:0007584	response to nutrient	15/448	165/21069	2.57276e-06	0.000204386	0.000168375	MAP1B/IGFBP2/KANK2/CYP1B1/BCHE/COL1A1/SNAI2/PTGS2/TBXA2R/SST/CCND1/SFRP2/NQO1/GNAI2/LIPG	15
Cattle	GO:0150115	cell-substrate junction organization	12/448	108/21069	3.254e-06	0.000248931	0.000205072	THBS1/PEAK1/ACTG1/FN1/ITGB3/ITGA5/FERMT2/DLC1/ACTN1/DAPK3/TLN1/GREM1	12
Cattle	GO:0051216	cartilage development	17/448	213/21069	3.37189e-06	0.000253259	0.000208637	CCN4/BMP1/CCN3/PRRX1/BGN/LOXL2/CCN2/RFLNB/CHSY1/CCN1/COL1A1/SNAI2/SFRP2/PKDCC/CTSK/COL11A1/GREM1	17
Cattle	GO:0010631	epithelial cell migration	24/448	393/21069	4.2095e-06	0.000305078	0.000251326	THBS1/CCN3/PTN/LOXL2/VSTM4/GPI/ANLN/KANK2/SERPINF1/ITGB3/MYH9/CYP1B1/PFN2/SNAI2/GADD45A/PTGS2/VEGFC/TBXA2R/ITGB1/ADAM9/FSTL1/CDH13/GREM1/FGF7	24
Cattle	GO:0010712	regulation of collagen metabolic process	8/448	46/21069	5.04318e-06	0.000336023	0.000276819	LARP6/CREB3L1/CCN2/ERRFI1/EMILIN1/ITGB1/VIM/INHBA	8
Cattle	GO:0007163	establishment or maintenance of cell polarity	18/448	246/21069	5.93366e-06	0.000389079	0.000320527	ILK/PARVA/AMOTL2/MAP1B/ACTR3/MSN/CLIC4/MYH9/WDR1/RHOQ/RHOC/MAP4/ITGB1/LMNA/GPSM1/FAT1/ACTB/RND3	18
Cattle	GO:0034446	substrate adhesion-dependent cell spreading	12/448	115/21069	6.29388e-06	0.00040625	0.000334673	ILK/PARVA/AKIP1/AXL/NTN4/PEAK1/P4HB/FN1/ITGB3/FLNA/LAMB1/FERMT2	12
Cattle	GO:0071496	cellular response to external stimulus	22/448	351/21069	7.01411e-06	0.000439019	0.000361668	SESN2/AXL/ASNS/WDR45B/FOSL1/HSPA5/MTPN/KANK2/ITGB3/NUAK1/ANKRD1/COL1A1/HSPA8/SNAI2/GADD45A/PTGS2/SFRP2/CNN2/CTSK/TMEM150C/DCTPP1/PMAIP1	22
Cattle	GO:0042692	muscle cell differentiation	25/448	434/21069	7.38202e-06	0.000455151	0.000374958	FHL2/CCN3/ACTG1/FLNC/NID1/MTPN/PTGFRN/MYH9/LAMB1/ANKRD1/CAPN2/PDLIM5/LOX/SMO/WDR1/CFL2/ITGB1/CSRP1/LMNA/TBX18/ACTN1/EHD2/EFEMP2/GREM1/EHD1	25
Cattle	GO:0031960	response to corticosteroid	15/448	181/21069	8.03457e-06	0.0004881	0.000402101	PARP1/IGFBP2/FOSL1/CCN2/ERRFI1/FIBIN/SERPINF1/CYP1B1/BCHE/PCK2/COL1A1/PTGS2/GLB1/ADAM9/CCND1	15
Cattle	GO:1901654	response to ketone	16/448	215/21069	1.5751e-05	0.000903716	0.00074449	PARP1/THBS1/GNG2/MSN/FOSL1/GPI/ERRFI1/FIBIN/SERPINF1/CYP1B1/PCK2/PSPH/TBXA2R/GLB1/CCND1/NQO1	16
Cattle	GO:0002040	sprouting angiogenesis	15/448	194/21069	1.84354e-05	0.00102914	0.000847819	PARVA/PKM/THBS1/ESM1/CREB3L1/LOXL2/VSTM4/RSPO3/ITGA5/PTGS2/VEGFC/TBXA2R/ITGB1/CDH13/GREM1	15
Cattle	GO:0032328	alanine transport	5/448	17/21069	2.12959e-05	0.00115755	0.000953597	SLC6A17/SLC1A4/SLC38A5/SLC3A2/SFXN1	5
Cattle	GO:0007492	endoderm development	10/448	93/21069	2.85985e-05	0.00145852	0.00120155	FN1/LAMB1/ITGA5/ITGB5/MMP2/COL12A1/COL11A1/COL5A2/COL5A1/INHBA	10
Cattle	GO:0009410	response to xenobiotic stimulus	25/448	472/21069	3.03382e-05	0.00150997	0.00124393	CTPS1/MAP1B/THBS1/FZD1/EMX2/IGFBP2/SEMA3C/FOSL1/HSPA5/ITGB3/CYP1B1/BCHE/ANKRD1/LOX/COL1A1/PTGS2/RPN2/VEGFC/TBXA2R/SST/CCND1/SFRP2/MMP2/NQO1/INHBA	25
Cattle	GO:0044319	wound healing, spreading of cells	7/448	44/21069	3.64047e-05	0.00172859	0.00142403	CCN1/FLNA/ITGA5/RHOC/FERMT2/ITGB1/COL5A1	7
Cattle	GO:0090505	epiboly involved in wound healing	7/448	44/21069	3.64047e-05	0.00172859	0.00142403	CCN1/FLNA/ITGA5/RHOC/FERMT2/ITGB1/COL5A1	7
Cattle	GO:0045214	sarcomere organization	7/448	46/21069	4.90213e-05	0.00222535	0.00183326	ACTG1/FLNC/ANKRD1/WDR1/CFL2/ITGB1/CSRP1	7
Cattle	GO:0006888	endoplasmic reticulum to Golgi vesicle-mediated transport	12/448	143/21069	5.68061e-05	0.00252329	0.00207871	GOLT1B/TMED3/SEC24D/SEC23A/LMAN1/KDELR2/KDELR3/HYOU1/TMED1/COPG1/ERGIC1/SEC13	12
Cattle	GO:0051261	protein depolymerization	11/448	122/21069	5.99969e-05	0.00258174	0.00212687	ARHGEF2/MAP1B/MTPN/LIMA1/HSPA8/WDR1/MAP1A/MICAL2/CFL2/NES/APC	11
Cattle	GO:1902903	regulation of supramolecular fiber organization	23/448	434/21069	6.22476e-05	0.00265098	0.0021839	ARHGEF2/MAP1B/ACTG1/CCN2/SYNPO2/MTPN/PFN2/FLNA/EMILIN1/AEBP1/LIMA1/HAX1/HSPA8/WDR1/MAP1A/RHOC/FERMT2/CFL2/DLC1/APC/DAPK3/EFEMP2/CDC42EP3	23
Cattle	GO:0006024	glycosaminoglycan biosynthetic process	9/448	83/21069	6.70141e-05	0.00274094	0.00225802	B4GALT4/ST3GAL6/DSE/CHSY1/CEMIP/B3GAT3/HS3ST2/CHPF/DSEL	9
Cattle	GO:0001655	urogenital system development	21/448	381/21069	7.43518e-05	0.00295334	0.00243299	RBP4/TNC/ILK/FBN1/EMX2/SEC61A1/NID1/NOTCH2/MAGED1/GLIS2/KANK2/SERPINF1/ITGB3/SMO/DCHS1/TBX18/MMP2/PKD2/RDH10/ID3/GREM1	21
Cattle	GO:0006457	protein folding	16/448	247/21069	8.43012e-05	0.00328536	0.00270651	PPIC/SACS/HSP90B1/P4HB/LMAN1/HSPA5/HYOU1/HSPA9/FKBP10/HSPA13/HSPA8/QSOX1/FKBP9/PDIA4/HSPB6/DNAJB4	16
Cattle	GO:1902041	regulation of extrinsic apoptotic signaling pathway via death domain receptors	7/448	51/21069	9.67722e-05	0.00367779	0.0030298	ARHGEF2/THBS1/PEA15/SERPINE1/SFRP2/TIMP3/PMAIP1	7
Cattle	GO:0030203	glycosaminoglycan metabolic process	11/448	129/21069	9.96102e-05	0.00374082	0.00308172	B4GALT4/ST3GAL6/DSE/BGN/CHSY1/CEMIP/GLB1/B3GAT3/HS3ST2/CHPF/DSEL	11
Cattle	GO:0051893	regulation of focal adhesion assembly	8/448	69/21069	0.000105486	0.00389076	0.00320524	THBS1/PEAK1/ACTG1/FERMT2/DLC1/DAPK3/TLN1/GREM1	8
Cattle	GO:0090109	regulation of cell-substrate junction assembly	8/448	69/21069	0.000105486	0.00389076	0.00320524	THBS1/PEAK1/ACTG1/FERMT2/DLC1/DAPK3/TLN1/GREM1	8
Cattle	GO:0007517	muscle organ development	20/448	364/21069	0.000114524	0.00418672	0.00344906	FZD1/MSC/TAGLN/FHL3/MKX/MTPN/ITGA11/MYL6/ANKRD1/LOX/SMO/CFL2/ITGB1/CD164/COL11A1/EFEMP2/LARGE1/FLNB/COL6A3/ID3	20
Cattle	GO:0050654	chondroitin sulfate proteoglycan metabolic process	6/448	37/21069	0.000118806	0.00430517	0.00354664	DSE/BGN/CHSY1/B3GAT3/CHPF/DSEL	6
Cattle	GO:0070482	response to oxygen levels	20/448	369/21069	0.000137529	0.00481764	0.00396882	PGK1/LONP1/THBS1/PLOD1/HSP90B1/CCNA2/P4HB/LOXL2/CCN2/PLOD2/HYOU1/CAPN2/COL1A1/PTGS2/VEGFC/LMNA/MMP2/DDAH1/VASN/PMAIP1	20
Cattle	GO:1901879	regulation of protein depolymerization	9/448	91/21069	0.000137614	0.00481764	0.00396882	ARHGEF2/MAP1B/MTPN/LIMA1/WDR1/MAP1A/CFL2/NES/APC	9
Cattle	GO:0048771	tissue remodeling	13/448	184/21069	0.000164002	0.00537691	0.00442955	PTN/AXL/SEMA3C/NOTCH2/RSPO3/ITGB3/FLNA/CSPG4/MMP2/CTSK/P3H4/CTHRC1/GREM1	13
Cattle	GO:0032970	regulation of actin filament-based process	22/448	434/21069	0.000169083	0.00541504	0.00446096	ACTG1/CCN2/SYNPO2/MTPN/NOTCH2/ITGB3/MYH9/LRP1/PFN2/FLNA/LIMA1/HAX1/WDR1/RHOQ/RHOC/FERMT2/CFL2/DLC1/DAPK3/CNN2/CDC42EP3/RND3	22
Cattle	GO:1905049	negative regulation of metallopeptidase activity	4/448	14/21069	0.000170465	0.00541504	0.00446096	PICALM/LRP1/TIMP2/TIMP3	4
Cattle	GO:0150116	regulation of cell-substrate junction organization	8/448	74/21069	0.000173354	0.00541504	0.00446096	THBS1/PEAK1/ACTG1/FERMT2/DLC1/DAPK3/TLN1/GREM1	8
Cattle	GO:0098869	cellular oxidant detoxification	10/448	115/21069	0.00017434	0.00541504	0.00446096	NXN/SESN2/SRXN1/TXNRD1/PTGS2/FBLN5/GPX7/NQO1/GPX8/PXDN	10
Cattle	GO:0071260	cellular response to mechanical stimulus	8/448	75/21069	0.000190502	0.00585895	0.00482666	MTPN/ITGB3/ANKRD1/COL1A1/GADD45A/PTGS2/CNN2/TMEM150C	8
Cattle	GO:0050818	regulation of coagulation	8/448	76/21069	0.000209019	0.00625693	0.00515452	THBS1/EMILIN2/SERPINE2/EMILIN1/PLAUR/SERPINE1/TBXA2R/ANXA5	8
Cattle	GO:0043434	response to peptide hormone	22/448	442/21069	0.000218431	0.00649166	0.00534789	PARP1/PKM/LONP1/MAP1B/FBN1/SESN2/CCNA2/CCN2/ERRFI1/EPRS1/ITGB3/CYP1B1/PCK2/COL1A1/RHOQ/PTGS2/BSG/TRIB3/APC/GNAI2/CTSK/INHBA	22
Cattle	GO:2000027	regulation of animal organ morphogenesis	11/448	142/21069	0.000233368	0.00678902	0.00559286	FZD1/NTN4/RSPO3/MAGED1/SNAI2/SMO/SFRP2/GPC4/CTHRC1/GREM1/FGF7	11
Cattle	GO:0061138	morphogenesis of a branching epithelium	14/448	218/21069	0.000252271	0.00718712	0.00592082	ILK/NTN4/SEMA3C/RSPO3/MAGED1/CLIC4/SNAI2/SMO/DCHS1/SFRP2/PKD2/RDH10/GREM1/FGF7	14
Cattle	GO:0006929	substrate-dependent cell migration	5/448	28/21069	0.000278899	0.00768087	0.00632757	FN1/ITGA11/CSPG4/SNAI2/VEGFC	5
Cattle	GO:0031639	plasminogen activation	5/448	28/21069	0.000278899	0.00768087	0.00632757	PGK1/THBS1/SERPINE2/PLAUR/SERPINE1	5
Cattle	GO:0060343	trabecula formation	5/448	28/21069	0.000278899	0.00768087	0.00632757	RBP4/FHL2/COL1A1/MMP2/GREM1	5
Cattle	GO:0032956	regulation of actin cytoskeleton organization	20/448	391/21069	0.000294396	0.00805396	0.00663493	ACTG1/CCN2/SYNPO2/MTPN/NOTCH2/ITGB3/LRP1/PFN2/FLNA/LIMA1/HAX1/WDR1/RHOQ/RHOC/FERMT2/CFL2/DLC1/DAPK3/CDC42EP3/RND3	20
Cattle	GO:0030194	positive regulation of blood coagulation	5/448	29/21069	0.000331163	0.00882602	0.00727096	THBS1/EMILIN2/EMILIN1/SERPINE1/TBXA2R	5
Cattle	GO:0021915	neural tube development	12/448	176/21069	0.000401304	0.0104923	0.00864368	PLOD3/FZD1/GORAB/SEMA3C/SMO/DCHS1/DLC1/SFRP2/PKD2/EN1/CTHRC1/PHGDH	12
Cattle	GO:0030336	negative regulation of cell migration	20/448	401/21069	0.000406886	0.0105185	0.00866524	THBS1/CCN3/S1PR2/RBBP7/EMILIN2/CLIC4/SERPINF1/CYP1B1/DPYSL3/LRP1/PFN2/EMILIN1/GADD45A/SERPINE1/TBXA2R/DLC1/SFRP2/CNN2/CCL2/GREM1	20
Cattle	GO:0061351	neural precursor cell proliferation	11/448	152/21069	0.000419508	0.0107237	0.00883432	ARHGEF2/ILK/PTN/EMX2/ATF5/RACGAP1/SMO/VEGFC/NES/ITGB1/GNAI2	11
Cattle	GO:1903829	positive regulation of protein localization	23/448	495/21069	0.000420539	0.0107237	0.00883432	RBP4/PARP1/SESN2/MSN/STAC/CEMIP/GLIS2/LRP1/FLNA/ANKRD1/PCK2/LRRC8A/SMO/MAP1A/PTGS2/FERMT2/VEGFC/ITGB1/B3GAT3/C1QTNF3/ADAM9/APC/MYH10	23
Cattle	GO:0031099	regeneration	13/448	203/21069	0.000426828	0.0108173	0.00891143	TNC/MAP1B/CCN3/PTN/AXL/PRRX1/CCNA2/MTPN/PTGFRN/FLNA/CCND1/MMP2/LARGE1	13
Cattle	GO:0001763	morphogenesis of a branching structure	14/448	233/21069	0.000494264	0.012035	0.00991458	ILK/NTN4/SEMA3C/RSPO3/MAGED1/CLIC4/SNAI2/SMO/DCHS1/SFRP2/PKD2/RDH10/GREM1/FGF7	14
Cattle	GO:0030166	proteoglycan biosynthetic process	7/448	66/21069	0.000495269	0.012035	0.00991458	DSE/CHSY1/B3GAT3/HS3ST2/CHPF/DSEL/HS3ST4	7
Cattle	GO:0046683	response to organophosphorus	10/448	132/21069	0.000530478	0.0126518	0.0104227	HSP90B1/FOSL1/HSPA5/CYP1B1/COL1A1/PTGS2/P2RX5/BSG/PKD2/NT5E	10
Cattle	GO:0060537	muscle tissue development	21/448	442/21069	0.000555837	0.0131209	0.0108092	RBP4/FHL2/MSC/SEMA3C/MTPN/NOTCH2/MYL6/ANKRD1/PDLIM5/LOX/SMO/CFL2/ITGB1/CSRP1/LMNA/TBX18/PKD2/COL11A1/EFEMP2/FLNB/GREM1	21
Cattle	GO:0010038	response to metal ion	19/448	383/21069	0.000601162	0.01408	0.0115992	PARP1/LONP1/SYT4/THBS1/CPNE2/IGFBP2/ACTG1/LOXL2/GPI/FIBIN/HSPA5/CLIC4/SERPINF1/PTGS2/BSG/ADAM9/CCND1/PKD2/NQO1	19
Cattle	GO:0010755	regulation of plasminogen activation	4/448	19/21069	0.000606689	0.01408	0.0115992	THBS1/SERPINE2/PLAUR/SERPINE1	4
Cattle	GO:0003333	amino acid transmembrane transport	9/448	113/21069	0.000695896	0.015709	0.0129412	PRAF2/SLC1A4/SLC25A15/SLC38A5/LRRC8A/SLC3A2/SLC1A5/SFXN1/ITGB1	9
Cattle	GO:0033688	regulation of osteoblast proliferation	5/448	34/21069	0.00071111	0.0158789	0.0130812	NPR3/CCN1/ITGB3/CTHRC1/GREM1	5
Cattle	GO:0033628	regulation of cell adhesion mediated by integrin	6/448	51/21069	0.00071636	0.0159101	0.0131069	ITGB3/CYP1B1/SNAI2/SERPINE1/ADAM9/SFRP2	6
Cattle	GO:0060485	mesenchyme development	17/448	330/21069	0.000758789	0.0167623	0.013809	TGFB1I1/SEMA3C/LOXL2/RFLNB/FN1/FLNA/COL1A1/SNAI2/SMO/FERMT2/DCHS1/ACTG2/SFRP2/PKD2/RDH10/VASN/GREM1	17
Cattle	GO:0042476	odontogenesis	10/448	139/21069	0.000794271	0.0171787	0.014152	FST/HTRA1/LAMB1/ASPN/COL1A1/SMO/SERPINE1/BSG/ID3/INHBA	10
Cattle	GO:0006979	response to oxidative stress	22/448	488/21069	0.000829683	0.0177587	0.0146298	PYCR1/PARP1/LONP1/FZD1/SESN2/AXL/P4HB/FOSL1/CYP1B1/SRXN1/CAPN2/COL1A1/PTGS2/ADAM9/FBLN5/GPX7/MMP2/PKD2/NQO1/GPX8/MSRB3/PXDN	22
Cattle	GO:0040013	negative regulation of locomotion	21/448	457/21069	0.000850933	0.0180267	0.0148506	THBS1/CCN3/S1PR2/RBBP7/EMILIN2/SEMA3C/CLIC4/SERPINF1/CYP1B1/DPYSL3/LRP1/PFN2/EMILIN1/GADD45A/SERPINE1/TBXA2R/DLC1/SFRP2/CNN2/CCL2/GREM1	21
Cattle	GO:0071498	cellular response to fluid shear stress	4/448	21/21069	0.000905808	0.019038	0.0156837	SOCS5/PTGS2/MMP2/PKD2	4
Cattle	GO:0048730	epidermis morphogenesis	5/448	36/21069	0.000930452	0.0192185	0.0158324	PLOD3/GORAB/FST/SMO/FGF7	5
Cattle	GO:0090025	regulation of monocyte chemotaxis	5/448	36/21069	0.000930452	0.0192185	0.0158324	CCN3/CREB3/SERPINE1/TNFSF18/GREM1	5
Cattle	GO:0000768	syncytium formation by plasma membrane fusion	7/448	74/21069	0.000989723	0.0200419	0.0165107	PTGFRN/MYH9/CAPN2/ITGB1/ADAM9/EHD2/EHD1	7
Cattle	GO:0042698	ovulation cycle	7/448	74/21069	0.000989723	0.0200419	0.0165107	PTN/AXL/HSPA5/SERPINF1/CYP1B1/MMP2/INHBA	7
Cattle	GO:0140253	cell-cell fusion	7/448	74/21069	0.000989723	0.0200419	0.0165107	PTGFRN/MYH9/CAPN2/ITGB1/ADAM9/EHD2/EHD1	7
Cattle	GO:0014012	peripheral nervous system axon regeneration	3/448	10/21069	0.00102526	0.0204607	0.0168557	TNC/MAP1B/MMP2	3
Cattle	GO:0001101	response to acid chemical	10/448	144/21069	0.00104217	0.0206982	0.0170514	SESN2/CCN2/CAPN2/COL1A1/SST/MMP2/PKD2/NQO1/COL5A2/PDGFC	10
Cattle	GO:0060348	bone development	14/448	252/21069	0.00106233	0.0209975	0.0172979	CCN4/FBN1/BGN/RFLNB/CHSY1/NOTCH2/FLNA/PLS3/LOX/COL1A1/DCHS1/PDGFC/GREM1/GNAS	14
Cattle	GO:0048659	smooth muscle cell proliferation	12/448	197/21069	0.00108699	0.0212079	0.0174713	CCN4/THBS1/CCN3/S1PR2/NPR3/ITGB3/CNN1/PTGS2/MMP2/GNAI2/EFEMP2/CDH13	12
Cattle	GO:1901653	cellular response to peptide	19/448	404/21069	0.00113112	0.0217334	0.0179042	ARHGEF2/PARP1/PKM/LONP1/MAP1B/FBN1/CCNA2/ERRFI1/EPRS1/ITGB3/CYP1B1/LRP1/PCK2/RHOQ/TRIB3/VIM/APC/GNAI2/INHBA	19
Cattle	GO:0031668	cellular response to extracellular stimulus	15/448	283/21069	0.00114747	0.0219453	0.0180787	SESN2/AXL/ASNS/WDR45B/FOSL1/HSPA5/KANK2/NUAK1/COL1A1/HSPA8/SNAI2/SFRP2/CTSK/DCTPP1/PMAIP1	15
Cattle	GO:0014074	response to purine-containing compound	10/448	146/21069	0.00115759	0.0220368	0.0181541	HSP90B1/FOSL1/HSPA5/CYP1B1/COL1A1/PTGS2/P2RX5/BSG/PKD2/NT5E	10
Cattle	GO:0007156	homophilic cell adhesion via plasma membrane adhesion molecules	11/448	174/21069	0.0012861	0.0242443	0.0199727	PALLD/AMIGO2/NEXN/DCHS1/PCDH18/ITGB1/BSG/FAT1/CDH11/CDH13/PVR	11
Cattle	GO:0010761	fibroblast migration	6/448	57/21069	0.00129702	0.0242443	0.0199727	ILK/THBS1/CCN3/ITGB3/ITGB1/CD248	6
Cattle	GO:0033687	osteoblast proliferation	5/448	39/21069	0.00134876	0.0249225	0.0205314	NPR3/CCN1/ITGB3/CTHRC1/GREM1	5
Cattle	GO:0062197	cellular response to chemical stress	18/448	384/21069	0.00156795	0.0279302	0.0230091	PYCR1/ARHGEF2/PARP1/LONP1/FZD1/SESN2/AXL/P4HB/ERRFI1/CYP1B1/SRXN1/PTGS2/FBLN5/GPX7/MMP2/PKD2/NQO1/GPX8	18
Cattle	GO:0001890	placenta development	10/448	153/21069	0.0016465	0.0289434	0.0238439	PARP1/PTN/FOSL1/NOTCH2/RSPO3/HTRA1/CCN1/PTGS2/BSG/PKD2	10
Cattle	GO:0003382	epithelial cell morphogenesis	5/448	41/21069	0.00169559	0.0296799	0.0244506	PLOD3/PALLD/CLIC4/FAT1/FLNB	5
Cattle	GO:0034976	response to endoplasmic reticulum stress	15/448	295/21069	0.00172733	0.0301081	0.0248033	THBS1/SESN2/HSP90B1/P4HB/CREB3L1/HSPA5/HYOU1/CREB3/TRIB3/PDIA4/CCND1/RCN3/MAN1A1/MANF/PMAIP1	15
Cattle	GO:0043200	response to amino acid	9/448	129/21069	0.00177554	0.0306893	0.0252821	SESN2/CCN2/CAPN2/COL1A1/SST/MMP2/NQO1/COL5A2/PDGFC	9
Cattle	GO:0035904	aorta development	6/448	62/21069	0.00201029	0.0333515	0.0274753	LOXL1/LRP1/FKBP10/LOX/PKD2/EFEMP2	6
Cattle	GO:0051653	spindle localization	6/448	62/21069	0.00201029	0.0333515	0.0274753	ACTR3/KPNB1/MYH9/MAP4/ITGB1/GPSM1	6
Cattle	GO:0033622	integrin activation	4/448	26/21069	0.00208056	0.0338378	0.0278759	FN1/FERMT2/FBLIM1/TLN1	4
Cattle	GO:1905048	regulation of metallopeptidase activity	4/448	26/21069	0.00208056	0.0338378	0.0278759	PICALM/LRP1/TIMP2/TIMP3	4
Cattle	GO:0010463	mesenchymal cell proliferation	5/448	43/21069	0.00210368	0.0340796	0.0280751	PRRX1/SMO/DCHS1/LMNA/FGF7	5
Cattle	GO:0000302	response to reactive oxygen species	12/448	214/21069	0.00218837	0.0351757	0.0289781	PYCR1/SESN2/AXL/FOSL1/CYP1B1/CAPN2/COL1A1/ADAM9/FBLN5/MMP2/PKD2/NQO1	12
Cattle	GO:0035437	maintenance of protein localization in endoplasmic reticulum	3/448	13/21069	0.00233018	0.0363619	0.0299553	HSPA5/KDELR2/KDELR3	3
Cattle	GO:0090177	establishment of planar polarity involved in neural tube closure	3/448	13/21069	0.00233018	0.0363619	0.0299553	FZD1/SFRP2/CTHRC1	3
Cattle	GO:2001046	positive regulation of integrin-mediated signaling pathway	3/448	13/21069	0.00233018	0.0363619	0.0299553	NID1/FLNA/LAMB1	3
Cattle	GO:0071634	regulation of transforming growth factor beta production	5/448	44/21069	0.00233259	0.0363619	0.0299553	LRRC32/LUM/THBS1/FN1/PTGS2	5
Cattle	GO:1900026	positive regulation of substrate adhesion-dependent cell spreading	5/448	44/21069	0.00233259	0.0363619	0.0299553	ILK/P4HB/ITGB3/FLNA/FERMT2	5
Cattle	GO:0071900	regulation of protein serine/threonine kinase activity	19/448	433/21069	0.00248368	0.0384273	0.0316568	THBS1/SESN2/CCNA2/CCNY/CEMIP/MAGED1/GADD45A/FERMT2/PRKAR2B/CCNYL1/TRIB3/ADAM9/CCND1/SFRP2/APC/PKD2/ACTB/PDGFC/FZD8	19
Cattle	GO:0001658	branching involved in ureteric bud morphogenesis	6/448	65/21069	0.002561	0.0388951	0.0320422	ILK/MAGED1/SMO/DCHS1/PKD2/GREM1	6
Cattle	GO:0043277	apoptotic cell clearance	6/448	65/21069	0.002561	0.0388951	0.0320422	THBS1/AXL/MFGE8/ITGB3/LRP1/CCL2	6
Cattle	GO:0060688	regulation of morphogenesis of a branching structure	6/448	65/21069	0.002561	0.0388951	0.0320422	NTN4/MAGED1/SNAI2/SMO/GREM1/FGF7	6
Cattle	GO:0051085	chaperone cofactor-dependent protein refolding	5/448	45/21069	0.00257908	0.0390263	0.0321502	HSPA5/HSPA9/HSPA13/HSPA8/DNAJB4	5
Cattle	GO:0006986	response to unfolded protein	10/448	163/21069	0.00262259	0.0395398	0.0325733	THBS1/CREB3L1/HSPA5/HSPA9/CREB3/HSPA13/HSPA8/CCND1/DNAJB4/MANF	10
Cattle	GO:0097529	myeloid leukocyte migration	14/448	280/21069	0.002828	0.0421083	0.0346892	THBS1/CCN3/CXCL6/EMILIN1/CREB3/WDR1/SERPINE1/VEGFC/BSG/MMP2/CNN2/CCL2/TNFSF18/GREM1	14
Cattle	GO:0071542	dopaminergic neuron differentiation	5/448	46/21069	0.00284392	0.0421083	0.0346892	FZD1/SMO/SFRP2/EN1/MANF	5
Cattle	GO:0072659	protein localization to plasma membrane	15/448	311/21069	0.00286396	0.0422536	0.0348089	PICALM/SEC23A/HYCC1/STAC/LRP1/FLNA/RHOQ/DCHS1/ITGB1/BSG/TSPAN17/PKDCC/EHD2/ACTB/EHD1	15
Cattle	GO:0006094	gluconeogenesis	7/448	89/21069	0.00288915	0.0424736	0.0349901	RBP4/PGK1/SESN2/GPI/PCK2/G6PC3/C1QTNF3	7
Cattle	GO:0048660	regulation of smooth muscle cell proliferation	11/448	193/21069	0.00290753	0.0425922	0.0350879	CCN4/THBS1/S1PR2/NPR3/ITGB3/CNN1/PTGS2/MMP2/GNAI2/EFEMP2/CDH13	11
Cattle	GO:0060394	negative regulation of pathway-restricted SMAD protein phosphorylation	3/448	14/21069	0.00291919	0.0426119	0.0351041	LRP1/EMILIN1/GREM1	3
Cattle	GO:0031346	positive regulation of cell projection organization	17/448	375/21069	0.00295356	0.0429618	0.0353924	MAP1B/FZD1/PTN/ACTR3/NGF/HSPA5/FN1/ANLN/SERPINF1/DPYSL3/FLNA/RHOQ/VLDLR/APC/CDC42EP3/ENC1/EHD1	17
Cattle	GO:0061640	cytoskeleton-dependent cytokinesis	8/448	114/21069	0.0030356	0.0440002	0.0362478	SEPTIN2/ACTR3/ANLN/RACGAP1/BIRC5/RHOC/APC/MYH10	8
Cattle	GO:0071604	transforming growth factor beta production	5/448	47/21069	0.00312787	0.0447801	0.0368903	LRRC32/LUM/THBS1/FN1/PTGS2	5
Cattle	GO:0060445	branching involved in salivary gland morphogenesis	4/448	29/21069	0.0031436	0.0447801	0.0368903	NTN4/SEMA3C/SNAI2/FGF7	4
Cattle	GO:1903902	positive regulation of viral life cycle	4/448	29/21069	0.0031436	0.0447801	0.0368903	AXL/P4HB/KPNA2/LGALS1	4
Cattle	GO:0007405	neuroblast proliferation	6/448	68/21069	0.00321784	0.0455236	0.0375028	ARHGEF2/PTN/RACGAP1/SMO/VEGFC/ITGB1	6
Cattle	GO:0016331	morphogenesis of embryonic epithelium	10/448	168/21069	0.00326019	0.0456537	0.03761	FZD1/TGFB1I1/ALDH1A3/VEGFC/DLC1/TBX18/SFRP2/RDH10/CTHRC1/GREM1	10
Cattle	GO:0044703	multi-organism reproductive process	12/448	226/21069	0.0034166	0.0473623	0.0390175	PARP1/PTN/IGFBP2/FOSL1/SERPINE2/ITGB3/CAPN2/ITGA5/PTGS2/BSG/MMP2/MAGED2	12
Cattle	GO:0045216	cell-cell junction organization	12/448	226/21069	0.0034166	0.0473623	0.0390175	ACTG1/FLNA/SNAI2/WDR1/RHOC/FERMT2/DCHS1/APC/SVEP1/TLN1/ACTB/CDH11	12
Cattle	GO:2000177	regulation of neural precursor cell proliferation	7/448	92/21069	0.00348	0.0477603	0.0393454	ILK/PTN/SMO/VEGFC/NES/ITGB1/GNAI2	7
Cattle	GO:0098754	detoxification	10/448	170/21069	0.00354738	0.0480192	0.0395587	NXN/SESN2/SRXN1/TXNRD1/PTGS2/FBLN5/GPX7/NQO1/GPX8/PXDN	10
Cattle	GO:0032231	regulation of actin filament bundle assembly	8/448	117/21069	0.00356091	0.0480192	0.0395587	ACTG1/CCN2/SYNPO2/PFN2/FLNA/RHOC/FERMT2/DLC1	8
Cattle	GO:0046655	folic acid metabolic process	3/448	15/21069	0.00359185	0.0480192	0.0395587	MTHFD2/ALDH1L2/SHMT2	3
Cattle	GO:0007611	learning or memory	15/448	320/21069	0.00373705	0.04948	0.0407621	PICALM/SYT4/PTN/FOSL1/GPI/NGF/SERPINF1/BCHE/ITGA5/MAP1A/PTGS2/PRKAR2B/ITGB1/VLDLR/EN1	15
Cattle	GO:0021575	hindbrain morphogenesis	5/448	49/21069	0.00375615	0.0495739	0.0408395	HSPA5/MTPN/SERPINE2/SMO/DLC1	5
